# Supplementary material
Source: publisher figshare collection journal article supplement (https://acs.figshare.com/ndownloader/files/20136311)
Supplement: Supplementary file 1 [file 20136311]

## Sheet: Overview
Overview
		Absolute abundances of enrichment methods
	Whole cell lysate (Lysate)	Replicate 1	Replicate 2	Replicate 3
	OEP (Organelle enriched pellet)	Replicate 1	Replicate 2	Replicate 3
	SDGC (Sucrose density gradient centrifugation)	Replicate 1	Replicate 2	Replicate 3
	SPIONs (Superparamagnetic iron oxide nanoparticles)	Replicate 1	Replicate 2	Replicate 3
	TMEM-IP (TMEM192-3xHA immunoprecipitation)	Replicate 1	Replicate 2	Replicate 3
	Values indicating the absolute abundance of proteins
	Missing values have been annotated with "Filtered"

## Sheet: Lysate
Abundances - Whole cell lysate (Lysate)
PG.ProteinAccessions	Replicate 1	Replicate 2	Replicate 3
A0AVT1	126824	85963.2	100230
A0FGR8-2;H7BXI1	190554	323541	392473
A0JLT2;A0JLT2-2	50431.8	86210	80769.9
A0JNW5	15609.9	12044.3	16531.8
A0MZ66;A0MZ66-2;A0MZ66-3;A0MZ66-4;A0MZ66-5;A0MZ66-6;B7Z7Z9	35290.1	25015	33671.1
A0PJW6	36104.6	67569.2	100042
A0PJZ3	Filtered	Filtered	Filtered
A0T4C8;E7ETB1;E9PCV4;Q9NRA0;Q9NRA0-2	17279.8	16771.6	22421.9
A1KXE4;A1KXE4-2;E7EVB9	45349.4	29925.3	32119.8
A1L020	35739.6	39340.2	51010.9
A1L0T0	120263	187919	231969
A1L170;A1L170-2;F8W6W0	Filtered	Filtered	Filtered
A1L188	18031.2	19603.6	24945.9
A1L443;D3YTH6;E2QRH1;F2Z373;Q5VZR2	Filtered	Filtered	Filtered
A1XBS5;A1XBS5-2;A1XBS5-3;A1XBS5-4;E5RGD0;F5H8I5;F8W7P5;G8JLC7;G8JLK8;H0YC32	30414.2	40597.5	59041.2
A2A2E9;Q86X10;Q86X10-3	126007	48170	41606.5
A2A2G4;Q9Y672	55873.2	46984.5	59600.4
A2A2L5;A8MSH5;Q9BY42	42128.6	23460	26839.7
A2A2Q9;Q9Y312	82797.2	102161	134756
A2A3N8;E7ENY0;E7EV99;P35611;P35611-2;P35611-3	190734	264857	255188
A2AAT3;B0S7V1;E9PD01;F6QTR8;F6REG0;F6RG32;F6SGB5;F6U8F7;F6UB75;F6UBK4;F6UKM5;F8VZ50;P28068	Filtered	Filtered	4891.56
A2AB90;A2ABB9;A8MUD0;D3YTI9;G5E9H8;O15533;O15533-2;O15533-3	12526.6	10136.2	11505
A2ABE9;A3KGM4;A3KGM5;A3KGM6;A3KGM7;B0UXD5;B0UXD6;B0UXD7;E7ENS8;H7C2J4;H7C5D6;O43196;O43196-2;O43196-3;O43196-4;Q5SSQ8;Q5SSR2	65721.4	75866.9	71974.9
A2ABF8;A2ABF9;B0UZY0;B0UZY1;B0UZY3;H0YHA9;H0YIM0;Q96KQ7;Q96KQ7-2	37409.1	67088.5	102213
A2AEA2;A2AEA4;F5GXA6;P10321	75479.5	70022.7	111824
A2BEU2;F5H135;P04440	Filtered	Filtered	61221.2
A2RRP1	46693.6	167175	127890
A2RTX5;A2RTX5-2	72620.4	71433	79055.9
A2RU67	10784.9	33214.6	42188.2
A2VCQ3;Q01973	Filtered	20893.2	24477.8
A3KFJ0;O14965	12831.2	12600.9	279379
A3KFL4	115097	181267	417282
A3KMH1;A3KMH1-3	25878	55110.3	73566.4
A3KMH1-2	Filtered	Filtered	Filtered
A3KN83;A3KN83-2;A3KN83-3	88138.6	87185.3	104134
A4D104	Filtered	Filtered	Filtered
A4D1D5;P21439;P21439-2	Filtered	Filtered	Filtered
A4D1E9	83051.9	184221	172751
A4D1P6	42007.4	44768.7	65570
A4D1S0;A4D1S0-2	10386.5	19322.4	20993.1
A4D1U4	23086.1	27511.8	31475.9
A4D1W8;Q9UM22	7895.71	9336.54	47705.3
A4D212;Q8N201	49252.3	84568.3	51191.4
A4D2Q0;E9PHI4	55000.9	78126	108350
A4D7V1;B8ZZU6;E9PBF9;E9PEK8;F5H629;G8JLM5;H7C2N6;P15336;Q8TAR1	12926.1	26837.4	30080.8
A4PB68;B0QZ55;H7BY62;Q3T8J9;Q3T8J9-2;Q3T8J9-3;Q9H869-2;Q9H869-3;Q9H869-5	3746.53	5615.1	11715.8
A5D8V6;F5H3K0;F5H4Q5	20183.4	30009.3	34056.5
A5PLL7;Q5TGE1;Q5TGE2	Filtered	56044.9	46547.5
A5PLN9;A5PLN9-2;A5PLN9-4;A5PLN9-5;A5PLN9-7;F5GXC3	442166	Filtered	89585.2
A5YKK6	122642	69789.5	81724
A6H8M8;B0UZ83;B0V2C8;F8VSI2;F8VW91;F8VZD8;P0C0L4;P0C0L5;Q5JNX2	287964	Filtered	Filtered
A6H8Z7;Q6UWP7	136850	276237	375403
A6NCB2;A6NMG4;Q9BX74	Filtered	Filtered	9324.34
A6NCD9;A6NKJ2;F8W8M4;F8WAB0;F8WAB1;H0Y3K7;O14639;O14639-2;O14639-3;O14639-4;O14639-5;Q5JVV3;Q5T6N2;Q5T6N4	38233.4	48699.8	85439.3
A6NCE7;H3BTL1;Q9GZQ8	138699	98057.1	111646
A6NCI0;Q9Y6G3	34799.3	61540.6	63725
A6NCN2	Filtered	Filtered	Filtered
A6NCZ0;C9JFX6;Q9BUJ0	Filtered	Filtered	Filtered
A6NCZ6;Q9BWM7	58455.9	33940.1	84859.9
A6NDG6	228676	185796	191828
A6NDJ8;Q86YS6	66224.7	85269.4	40794.1
A6NDN0;O43617	356280	250998	312706
A6NDS2;Q86WR7;Q86WR7-2	Filtered	Filtered	Filtered
A6NDU8	53265.9	34249.4	41595.8
A6NDW3;B4DKL4;E9PHD4;Q86X29	23722.6	58295.2	110111
A6NDW6;H0YDD3;H0YDQ1;Q9BVK2	107698	110013	129721
A6NDY9	173158	108863	94455.4
A6NE20;E7EQL6;F8WB49;O43272;O43272-1;O43272-2	Filtered	Filtered	Filtered
A6NED2;G3V2I3	37364	32627.5	32875.3
A6NEM2	458936	611022	730850
A6NEP9;H7BXY6;Q8NG11;Q8NG11-2;Q8NG11-3	9644.18	14558.9	21020.4
A6NES3;E9PL33;E9PM05;E9PS58;O14681	183264	306405	334049
A6NF48;Q9Y2X9	35976.2	77195.3	59739.3
A6NFN2;F5H1G9;F8WA55;F8WA56;Q8IZP0;Q8IZP0-10;Q8IZP0-2;Q8IZP0-3;Q8IZP0-4;Q8IZP0-5;Q8IZP0-6;Q8IZP0-7;Q8IZP0-8;Q8IZP0-9	140432	160580	148290
A6NFN6;Q9ULL5;Q9ULL5-2;Q9ULL5-3	Filtered	66010.3	94176.6
A6NFQ9;A6NMH6;F6W7K9;F8W8I8;Q92599;Q92599-2	142912	106111	98223.7
A6NFV8;Q96EV8	73925.4	47899.3	47253.8
A6NFX8;Q9UKK9	275641	321187	244277
A6NFY7	12807.8	11976.6	12318
A6NG10;B4DFG2;E7EX86;Q969T9	16715.9	Filtered	19544.3
A6NG79;Q92733	121469	186033	206585
A6NGJ4;Q7Z7H8	97073.3	120606	158418
A6NGW1;O95070	52809.8	63775.6	79708.1
A6NHB5;A6NHN7;Q14202;Q14202-2	65500.1	109797	145330
A6NHF2;B4DLJ9;F8W1Q3;P43251	5448.34	6584.78	589.88
A6NHR9	197493	247288	331977
A6NHS7	249760	29906.7	87820.5
A6NI00;P63092;P63092-2;P63092-3	353237	566807	728451
A6NI04;B4E3U2;E9PJM3;E9PL46;Q9UK99;Q9UK99-2;Q9UK99-3	94605.8	59891.5	72358.6
A6NI12;C9JDH3;H7BXQ4;H7BYF2;Q5JRG1;Q9BVL2;Q9BVL2-2	89058.4	92982	112580
A6NIG5;Q969Y2;Q969Y2-2;Q969Y2-3	69665.7	142665	166306
A6NIH7	140604	84600.1	71699.4
A6NIR2;Q9Y547	126791	43977.7	52582.7
A6NIW1;P14209	57560.5	71960.4	61605.6
A6NIW2;Q5JSL3	4333.24	Filtered	33699
A6NJ78	16497.2	31020.9	32320
A6NJD7;Q8IWP9	32292.2	29075.8	30060.6
A6NJF5;Q9UI36;Q9UI36-2	25901.2	54443.4	42483.4
A6NJK7;Q76FK4;Q76FK4-2;Q76FK4-3;Q76FK4-4	55527.3	59457.5	71099.8
A6NJM0;B1AKC9;P29323;P29323-2;P29323-3	Filtered	2623.91	5543.96
A6NJP5;P32189;P32189-1;P32189-2	58654	54616.9	78474.5
A6NJX0;A8K7N4;Q9H4F1	Filtered	Filtered	738534
A6NJZ6;O75054-2	23085.7	25479.3	50371.7
A6NJZ9;Q8WTT2	132486	245570	296551
A6NK58	17783.2	40694.6	43571.6
A6NKD9	20195.1	20334.9	45013
A6NKF1;F8WC89	192629	87354.2	201138
A6NKF9;B7ZAQ6;B7ZAQ6-2;B7ZAQ6-3;P0CG08	56648.6	97949.9	119664
A6NLH6;Q9P003	247867	154518	237948
A6NMI8;Q9BX70;Q9BX70-2;Q9H0C5	7444.24	Filtered	Filtered
A6NML8;C9J6U3;F5H7I1;O60879;O60879-2;O60879-3	7916.84	23913.2	26597.5
A6NMN0;P46020;P46020-2	36286.9	27415.5	31638.9
A6NMQ1;P09884	416048	278429	437911
A6NN50;O75147	21687.4	24018	34066.8
A6NNI4;B4DPP0;G8JLH6;P21926	61025.5	76379	63825.2
A6NNL5	59897.2	52824.9	237599
A6NNV6;O95229	52563.3	24498.6	23635.2
A6PVM9;F5GYC9;Q9BQI0;Q9BQI0-2;Q9BQI0-3	111691	39530.5	34403.3
A6PVN5;Q15257;Q15257-2;Q15257-3	220972	72166	66974.4
A6PVT6;A8MSQ5;F5GZV0;F5H083;F8WEA4;Q9NR82;Q9NR82-2;Q9NR82-3;Q9NR82-4	Filtered	Filtered	311707
A6PW55;Q15906	86029	136819	220893
A6PW57;Q99755-2;Q99755-3	71654.1	78925.1	114854
A6PWM2;Q6UXH1;Q6UXH1-2;Q6UXH1-3;Q6UXH1-4;Q6UXH1-5;Q6UXH1-6	94751.3	68401.6	13470
A6QRH6;P98173;Q5HY75	21198.9	47091.1	69550.1
A7E2V4;A7E2V4-3;A7E2V4-4;A7E2V4-5	15616.2	24075.5	31519.1
A7MAP0;Q9ULV4	537567	699009	703703
A8CG34	58688.6	111786	152424
A8CTX8;A8CTY3;B4DTM2;E7ERJ0	66230.5	43377.7	70407
A8K040	43363.9	50778.4	53609.4
A8K092	3.0604e+06	6.84684e+06	9699788
A8K1B6	478520	442803	602101
A8K1C9;Q96LT9	14754.8	20086.9	19645.6
A8K2U0;F5H2W3	Filtered	Filtered	Filtered
A8K2U1;F5H225;Q5NDL2;Q5NDL2-2;Q5NDL2-3	Filtered	7031.43	Filtered
A8K327;B4E0V4;Q9UQ49	Filtered	Filtered	Filtered
A8K3Z3;P62195	449584	534138	516408
A8K7Q2	95786.1	79855.7	84796.7
A8MPX7;F5GWL7;Q9H5V9	126127	145117	166382
A8MPX9;O75140;O75140-3;O75140-4;O75140-8	19179.2	158690	Filtered
A8MQB8;G3V0J0;Q06787-2	152827	117135	131011
A8MST6;E7ERV6;E9PHX5;Q5JTW2;Q5JTW2-2;Q5JTW2-3	29128	87596.1	103234
A8MT24;E5RGQ3;Q9H446	159552	123969	112341
A8MT69;A8MT69-2;A8MT69-3	5225.84	12881.8	7874.33
A8MT70;A8MT70-2;F2Z370	Filtered	28641.1	41674.7
A8MTC3;C9JWB0;Q7Z5J4;Q7Z5J4-2	44888.4	34443.1	79150.6
A8MTG3;E1P660;H0Y3M2;O43670;O43670-2	258077	239118	211692
A8MTG8;B7Z441;C9JAA7;C9JBY2;F5GWK4;G5E9V6;Q8IUR7;Q8IUR7-2;Q8IUR7-6	74111.9	87888.7	72436
A8MTH6;C9J0K6;P30626	944050	599069	632178
A8MTN3;F5H1T9;F5H6S0;P0C7H8;Q9BYR9;Q9BYU5	Filtered	Filtered	Filtered
A8MTT3	38324.9	Filtered	65580
A8MTY9;O14972	48294.2	40550.6	63154.8
A8MU17;F5H2B2;F5H6B6;F5H8A0;Q86TN4;Q86TN4-2	41822.6	47149.7	51840.3
A8MU27;A8MUA9;B4DUW4;P55854	3.98837e+06	4480212	3.03048e+06
A8MU44;Q9UJC3	9739.05	6162.26	11331.6
A8MU99;Q9NRP7;Q9NRP7-2	105456	91227	116298
A8MUB1;P68366	Filtered	Filtered	Filtered
A8MUM1;Q53HC9	62676.6	58400.5	51009.5
A8MUS2	120272	478470	496477
A8MUW5	363154	391494	394308
A8MV58;Q16643;Q16643-2	272223	403987	479854
A8MV89;Q5M775;Q5M775-2;Q5M775-3;Q5M775-4;Q5M775-5	43206.4	60565.9	21638.4
A8MVZ6;F8W113;Q96G01;Q96G01-3	14401	11307.8	18270.7
A8MWB4;B7Z1T4;O43739;O43739-2;Q15438;Q15438-2;Q99418;Q99418-2	49007.2	51506.4	55410.5
A8MWD3;O15371	804219	724338	1147954
A8MWD9;F5H013;P62308;Q49AN9	1.23871e+06	1.15246e+06	959183
A8MWK3;P19022	73060.2	123554	138733
A8MWX0;Q96HR9	147404	79468.4	90102.8
A8MWY0	Filtered	Filtered	Filtered
A8MWY4;Q13029;Q13029-2;Q13029-3;Q5THJ1	1675.39	5345.24	Filtered
A8MX09;O94967;O94967-2;O94967-3	1262.01	2822.09	1808.44
A8MXF4;C9JX84;E7ET33;Q06033;Q06033-2	Filtered	11944.1	11712.7
A8MXP7;E9PAJ8;Q6NUT3;Q6NUT3-2	Filtered	Filtered	Filtered
A8MXP9;P43243	1.0469e+06	1.81876e+06	2.29649e+06
A8MXQ1;P53801	86926.4	278166	115195
A8MXR0;Q9Y608;Q9Y608-2;Q9Y608-4	34152.9	20715.8	31579.3
A8MXV4	131054	326806	371232
A8MYC7;B1AMF0;Q8N2K1;Q8N2K1-2	Filtered	Filtered	12593.3
A8MYH2;B7WPL9;D6RBU4;D6RFZ8;E9PGM8;F8W9A8;H7BXU5;O43314;O43314-2;Q6PFW1;Q6PFW1-2;Q6PFW1-3;Q6PFW1-4;Q6PFW1-5;Q6PFW1-6;Q6PFW1-7	46818.8	Filtered	50350.5
A8MYQ9;Q9BZG1	151897	28900.2	178192
A8MYY3;Q9UPQ9-1	19552.5	17608.9	17658.5
A8MZF9;P55039	184126	133033	185236
A9C4B9;B0V3J0;E7EQB3;Q9BSV6	89251	63404.1	58477.7
A9X3U0;Q96GF1	31799.7	46944	57104.3
A9Z1X7;E9PCT1;Q8IYB3;Q8IYB3-2	326588	479948	507621
B0AZR7;Q13303;Q13303-2	30094	10307.2	2326.59
B0AZS3;B7Z5Z0;B7Z8R1;B7Z9U0;Q9UFF9	15532.9	17657.3	19655.6
B0AZS9;H0YBC7;H7BXD2;O60238	11713.4	24547.2	38568.6
B0QXZ6;O95503	6616.38	7882.65	13079.9
B0QXZ8;B0QXZ9;Q9UGU5	16921.6	29149.8	27411.3
B0QY29;Q9NWS6	30211.2	20546.2	26761.9
B0QY62;Q9UH99	65930	116364	129989
B0QY89;Q9Y262	396792	373404	575389
B0QY95;Q9NQG6	1996.63	58495	28638.4
B0QYK0;B0QYK1;Q01844;Q01844-3;Q01844-5	682735	757303	705582
B0QYM8;Q9HBI1;Q9HBI1-2	3902.03	1890.36	2539.19
B0QYW5;B4DU97;F5GYD1;O43808	50773.9	27050.2	56524.7
B0QZ44;P41229;P41229-2	65281.8	85359.7	133469
B0QZ88;Q9H7B4	178507	165592	187788
B0QZE2;B7Z293;B7Z3Z1;E7ENI9;F5H449;F6UH50;Q15326;Q2LD45;Q5BJG6;Q5VUI0	Filtered	16712	23357.4
B0S7Q4;F8VSH7;F8VX15;H7C4U4;H7C5B5;H7C5D3;Q0P5T2;Q5SQH8;Q5SQH8-2;Q5SQH8-3	Filtered	4110.58	6049.93
B0S872;G8JLE1;Q9UMR5	53467	52775.2	186084
B0S8I7;Q14657	65851.3	46455.3	50590.6
B0UX83;G3V1Z5;P46379;P46379-2;P46379-3	297065	177054	259794
B0UZZ8	156749	174280	302250
B0V043;P26640	562669	319663	422092
B0YJ65;Q86UU1;Q86UU1-2;Q86UU1-3	Filtered	Filtered	Filtered
B1AH87;P30536	55388.3	180104	154192
B1AH89;Q14166	246705	190134	175881
B1AHH4;B1AHH5;B1AHH6;Q9H7Q0;Q9UIA0	Filtered	Filtered	Filtered
B1AHL2;P23142-4	Filtered	5728.72	6555.17
B1AHQ6;Q9NSP4;Q9NSP4-3	2846.07	1615.19	4439.18
B1AHR1;B1AHR2;B7Z686;Q9UH03;Q9UH03-2	114357	37679.5	Filtered
B1AJY5;B1AJY7;O75832	262265	224704	269763
B1AK13;P35914	40029.6	101708	116762
B1AK44;Q9UI95	94244.4	144389	192291
B1AK51	89510.9	97755.2	132786
B1AK64;Q9HAF1;Q9HAF1-2;Q9HAF1-3	62644.2	138027	159381
B1AK87;B1AK88;E7EQ40;P47756-2	478666	336072	436240
B1AKB1;B1AKB2;B1AKB4;P19484	Filtered	Filtered	Filtered
B1AKC7;F8W755;Q9UJF2	Filtered	Filtered	56067.7
B1AKD8;Q5TZA2	98493.9	53278.4	39652.1
B1AKJ5;O43847;O43847-2	99129.8	63269	73570.8
B1AKN3;Q9P2R6;Q9P2R6-2	13222.9	19115.5	18925.4
B1AKR6;Q9NP97	620208	351752	314344
B1AKT6;Q9Y483	102685	163012	217272
B1AKU4;B1AKU5;F5H591;Q92845	1092.51	930.884	1339.22
B1ALH6;O14832	52148.7	Filtered	76678.5
B1ALK7;B7Z6G2;Q14155-1;Q14155-5	154782	142813	159457
B1ALM5;Q9P0T7	37565.3	100118	120676
B1ALU3;O95490;O95490-2;O95490-5;O95490-6;O95490-7	42515.4	59689.2	74657.4
B1AM27;F5GZ07;F8W8M9;O14795	Filtered	Filtered	Filtered
B1AMS2;F5H1J5;Q14141;Q14141-2;Q14141-4	136778	113677	123208
B1AMV7	Filtered	Filtered	Filtered
B1AMW1;P19256;P19256-2;P19256-3	29604.9	46250.6	51515
B1AN99;F8W7P3;P35030;P35030-2;P35030-3;P35030-4	Filtered	Filtered	Filtered
B1ANH0;Q16774-2	56930.4	143441	124529
B1ANR0;Q13310;Q13310-2;Q13310-3	1.03995e+06	875230	655817
B1AP13;E9PSH2;H3BLV0;P08174;P08174-2;Q14UF4;Q14UF5;Q14UF6	174795	278750	337708
B1AP58;P15169	Filtered	Filtered	Filtered
B1APM4;P35610	82707.4	180151	249572
B1APS8;Q96S38	Filtered	Filtered	Filtered
B1APY4	Filtered	25601.7	20767
B1AQP1;E9PME6;P22415;Q7Z5Y1	35433.6	99502.9	112101
B1AT46;Q9Y692;Q9Y692-2	35938.8	41902.4	921445
B1AVT0;P49760;P49760-3	61653.9	112849	115699
B1AVU8;P07602	834731	1.15856e+06	831948
B1AZV3;F5H648;Q03518	27396	39079	33418.6
B1Q2X3;P21675;P21675-2;P21675-3;P21675-4	Filtered	64133.7	58693
B2CI53;B5M453;D3K174;E9PDL9	40850.4	64999.1	92865.8
B2R603;P07910	379672	287456	89273
B2RD65;Q5PSV4	61263.9	72267.9	92917
B2RXF5	132804	43528.5	61786.3
B2WTI4;Q6NYC1;Q6NYC1-2;Q6NYC1-3	106804	131963	176530
B3KMX7;B4DV65;F5H1A6;H0YKU8;H0YL81;H0YLB7;H0YLG0;H0YMI4;Q6JHV3;Q9Y6I4	45001.2	84969.5	143117
B3KNT8;F5H4R6;F8VY35;H0YIV4;P55209	2.71724e+06	2687197	2.93762e+06
B3KP14;F5H5I6;H0Y8R1;H0YAK1;Q12849	336911	617403	679471
B3KP49;B4DID0;B4DQH9;Q6VN20	17974.3	17562.4	22003.5
B3KP61;C9K000;P31751;Q0VAN0	53884.9	43867	98301.1
B3KPJ4;Q8IXK0;Q8IXK0-2;Q8IXK0-4;Q8IXK0-5	82676.9	117163	115724
B3KPS6	Filtered	24713.9	Filtered
B3KQ29	44581.3	47825.7	Filtered
B3KQW7;I3L1H5;Q9BZG8;Q9BZG8-2;Q9BZG8-3	57878.7	44257.5	55329.2
B3KR41;Q9Y6D9	54801	45161.8	48245
B3KRD1;B7Z4D2;Q9NX95;Q9NX95-2;Q9NX95-3;Q9NX95-4;Q9NX95-5	Filtered	Filtered	21681.8
B3KRF7;E9PC66;P17029	24713.3	19564.2	24948.5
B3KRJ9;Q8WXA9-2	158159	284747	289378
B3KRR0;P07992;P07992-3	Filtered	38334.2	Filtered
B3KRS5;Q92769	584268	546295	778488
B3KRY5;Q6NZI2	20421.2	31480.4	47451.7
B3KS61;O60725	69813.6	98850.4	154163
B3KSH1;B4DMT5;O00303	936349	653512	810472
B3KSI9;Q9NQ48	78966.9	58455.9	59181.3
B3KSY9;O75925	7077.79	16197.9	23592.9
B3KT25;Q96S55;Q96S55-2	64764.1	64765.2	79951.4
B3KTC7;P49959	149918	173035	220997
B3KTH8;P20265;P20265-2;P20265-3	32142.2	30353	30812.8
B3KTI1;P04745;P04746;P19961	Filtered	Filtered	Filtered
B3KTM8;H0YMJ0;Q9UBU8-2	102752	134684	159883
B3KTR6;Q9BRK3;Q9BRK3-2	Filtered	56868.5	54399.5
B3KU92;Q6P2P2;Q6P2P2-2	10682.4	5831.42	6705.66
B3KUB4;O43570;O43570-2	17316	41658.3	56651.8
B3KUV7;P37287;P37287-2;P37287-3	12358.6	34781.6	38070.9
B3KV94;F5H7Y2;Q9UGL1;Q9UGL1-2	23365.6	60183.5	79686.8
B3KVH8;I3L4Q4;Q9BUL5	79873.2	42814.4	60651.1
B3KVR1;E7ENP4;P14678;P14678-2;P14678-3;P63162	3341681	3.55525e+06	3.78425e+06
B3KVU0;H7BZK4;Q8WUM9	20504.9	25315.9	33256.6
B3KVZ3;H0Y9E6;Q9H3R5	29284.8	25491.8	41284.2
B3KXE0;P32780	19002.3	26159.8	27735.9
B3KXK7;F8VZA2;Q6P1Q0	Filtered	35263.4	31335.3
B3KXS5;P36776	351350	711212	1122086
B3KXW5;O43747;O43747-2	138022	102904	143789
B3KXX3;Q9UHW9;Q9UHW9-2;Q9UHW9-3;Q9UHW9-4;Q9UHW9-5;Q9UHW9-6	18742.8	16275.9	16163.8
B3KY39;Q8TCG2	20370.1	65603.3	86135.1
B3KY94;H3BTV1;O14735	95832.6	175154	191427
B3KYA7;Q13188	127501	114410	132480
B3V0L1;F8WCT1;Q66PJ3;Q66PJ3-2;Q66PJ3-3	158025	167013	226825
B4DDD1;Q8IZ73	77563.3	57484.9	68498.6
B4DDF4;B4DUT8;Q99439;Q99439-2	Filtered	32567.4	31231
B4DDF7	2.32243e+06	1.86752e+06	2.33947e+06
B4DDG0;B4DEA5;B4DEB8;B4E171;P41732	15802.6	Filtered	5386.93
B4DDG7;Q9BXS5;Q9BXS5-2	169286	111055	179543
B4DDK9;Q10469	165630	291526	445001
B4DDP2;E7EV43;Q6NW29	85146.6	72487.5	58586.2
B4DDR3	214684	271136	327087
B4DDT2;O75191	108602	114554	77392.7
B4DDT7;F8VYY9;F8W9D1;H0YHF8;P54619	112022	146576	66528.5
B4DDV1;Q13325	16250.3	6675.52	8510.89
B4DDV3;Q8N6T7;Q8N6T7-2;Q8N6T7-4	53209.2	66578.3	84467.6
B4DDV7;B7ZM03;C9J121;C9J2P9;Q75N03	101048	151607	167144
B4DDY7;B4DNN0;Q5T4K2;Q5T4K3;Q5T4K4;Q9NY26	Filtered	Filtered	Filtered
B4DE11;E7EW45;P78381;P78381-2	7935.14	Filtered	5614.7
B4DE98	Filtered	15032.5	13736.8
B4DEH8;G3V4T2	67805.6	154334	250752
B4DEI4;B4DKT0;Q9H8Y8	126046	150456	153724
B4DEN4;E7EV05;E9PFU9;Q8WV99;Q8WV99-2	73403.6	84985.1	97259.3
B4DEX5;C9JA75;E9PDK8;H0Y4B0;O43414;O43414-2;O43414-3	123866	77241.9	90079.6
B4DF08;B4DJB7;B7WPA5;B8ZZN1;Q96CS7;Q96CS7-2;Q96CS7-3	Filtered	Filtered	Filtered
B4DF14;P43003;P43003-2	72500.6	188266	376152
B4DF64;Q68CZ6	7842.02	5279.28	8131.68
B4DFH6	145611	Filtered	Filtered
B4DFI4;E9PQZ8;H0YEM7;O75143;O75143-2;O75143-3	29977.7	8584.53	11916.6
B4DFQ6;B4DHT5;Q96CM8	140663	82813	263235
B4DFR4;B4DGM3;C0IMW5;Q969G3;Q969G3-2	177025	249444	233413
B4DFT0;H3BPN6;H3BT78;Q6PHR2;Q6PHR2-2;Q6PHR2-3	14055.6	7546.33	10278.5
B4DFW2;P16035	Filtered	Filtered	Filtered
B4DG42;C9J5M0;C9JC07;C9JJV6;C9JZL8;Q96S97	48143.8	49203.7	74137.8
B4DG62;P19367	624303	954428	1.23245e+06
B4DGI9;E9PGY0;F5H6Z6;Q99081;Q99081-3	19317.5	34850.5	21824.6
B4DGM2;Q9H875	12762	14542.7	14142.9
B4DGM4;Q9NX70	61461.8	98888.8	114988
B4DGR6;Q8NEZ3	4208.32	Filtered	3156.33
B4DGU4;P35222	120274	215182	257860
B4DGX2;P48426	90260.4	81235.3	93654
B4DH44;P45985;P45985-2	91201.9	61834.7	61984.3
B4DH52;P78347;P78347-2;P78347-3;P78347-4	1.26417e+06	1.60476e+06	1.87145e+06
B4DH53;Q66K74	92385.6	55895.5	80522.4
B4DH70;Q9UKB1;Q9UKB1-2;Q9UKB1-3	46092.6	46205.5	50138.3
B4DHE8;Q96DH6;Q96DH6-2	116761	141489	126190
B4DHJ7;Q12983	8004.6	11033.1	18341.3
B4DHN0;P28482	383499	310668	346421
B4DHP5	1.56303e+06	1.30773e+06	1.21733e+06
B4DHY4;B4DT77;P20073;P20073-2	223733	193287	216117
B4DI13;B7Z821;E9PCU2;H0Y3I0;H0Y818;P40692	38443.9	41721	54527
B4DI41;Q9UIS9;Q9UIS9-4;Q9UIS9-5;Q9UIS9-7;Q9UIS9-8;Q9UIS9-9	39618.7	93436.6	111930
B4DI61;O00622	Filtered	Filtered	Filtered
B4DII8;P05067;P05067-8	69157.9	106522	159775
B4DIJ9;Q59FJ7	64698	108801	131697
B4DIQ0;O60942	76986.4	77848.1	85715.4
B4DIR7;Q99504	27495.2	27324	39689
B4DIV9;B7Z3B1;Q9Y2E8;Q9Y2E8-2	Filtered	Filtered	Filtered
B4DJJ3;Q6NXT6;Q6NXT6-2	Filtered	33833.6	57905.2
B4DJL6;B4DVD5;B4DVT3;H3BRY6;Q96SY0;Q96SY0-3	40091.5	48217.9	50387.1
B4DJN2;B4DMK1;O95258;O95258-2	55332.8	30567.9	Filtered
B4DJP7;P62318	903514	1248174	1.32694e+06
B4DJU2;D3DWC4;H7C1W3;Q86VZ5;Q86VZ5-2	Filtered	Filtered	22905.4
B4DJV2;O75390	2.94576e+06	5719089	7.05387e+06
B4DK30;Q15029	1.0187e+06	1.54736e+06	2.4893e+06
B4DK60;Q8TDN4;Q8TDN4-2	5724.97	Filtered	Filtered
B4DK95;Q9C0D3	31751.7	22680	50671.9
B4DKB9;E7EWT6;Q9P1Z2;Q9P1Z2-2;Q9P1Z2-3;Q9P1Z2-4	Filtered	Filtered	Filtered
B4DKC2;Q7L099;Q7L099-2;Q7L099-3;Q7L099-4	41352	32576.3	26036.2
B4DKJ1;Q14CX5	Filtered	Filtered	Filtered
B4DKK6	252051	309864	448198
B4DKR6;O15234	16053.7	11156.3	27988.7
B4DKX7;Q8IW45;Q8IW45-2	69167.8	65561.9	85103.6
B4DKY1;P49589;P49589-2;P49589-3	173233	124058	159893
B4DL13;Q9UL03;Q9UL03-3	25007.2	32016.5	34122.4
B4DL14	Filtered	4255.18	Filtered
B4DL54;B4E1A0;H0YHI0;P49356	113070	53413.3	87571.4
B4DLC0	481916	529595	486610
B4DLE8	3568.65	2768.75	4128.83
B4DLH4;Q9H910	669366	516828	506904
B4DLP8;B4DV66;Q9BWT1;Q9BWT1-2;Q9BWT1-3	66494.8	126062	186640
B4DLP9;Q7KYR7	49514.5	36581.2	63979.7
B4DLT4;F6UYM1;P23443;P23443-2	92281.2	53024	77715
B4DLX8;C9J453;O15344;O15344-2	98589.9	63568	52972.5
B4DLZ9;F8WB55;Q5TDE7;Q5TDE8;Q5VTB9	89108	69113.1	73191
B4DM24;C9J9E2;E7ETR1;Q8NCB2;Q8NCB2-2;Q8NCB2-3	21172.3	18028.5	21133.1
B4DMI6;Q5MNZ6	40852.3	46622.2	27974.5
B4DMU0;P32322	74313.5	121552	112809
B4DMV3;H7C5G1;Q2TAA2	46391.9	43446.7	51283.8
B4DN34;Q96GC5	105385	190604	288683
B4DN50;P17302	39508.3	43093	57359
B4DN67;Q5W0F9;Q5W0G0;Q96J84;Q96J84-2;Q96J84-3	12584.7	20238	31257.8
B4DN88;E7ETU5;P29558;P29558-2	78580.9	137177	150775
B4DNH5;P58317	6570.1	25801.2	7800.76
B4DNI1;C9K0U0;Q7Z422;Q7Z422-2;Q7Z422-3;Q7Z422-4	81763.7	59312.2	62036.1
B4DNJ6;Q9Y3F4	657075	681915	745063
B4DNR3;F8W9U3;Q96IU4	58037.6	20534.4	18959.7
B4DNX9;Q14592	8179.51	7572.99	9483.53
B4DP11;Q15185	1.55809e+06	4543332	3.66239e+06
B4DP24;Q9BW60	5864.66	5180.44	6225.65
B4DP27;Q15363	246508	113393	133106
B4DP36;E7ENK0;E9PBE5;Q13137	36756.5	33854.3	25960.7
B4DPC1;F5H869;H0Y6D8;P20226	55967.4	71247.2	75890.8
B4DPR4;C9J494;Q9H000	88162.5	113675	130022
B4DPR9;Q99551	Filtered	28222.3	28232.8
B4DPV8;Q8NC54	71723.5	99305.7	95364
B4DPW7;E7EQF4;E9PDG2;G3XAB1;H7C3C0;Q9HBG6;Q9HBG6-2;Q9HBG6-3;Q9HBG6-4	Filtered	Filtered	Filtered
B4DPY8;F6TTN0;O94842	149944	144913	146722
B4DQ14;Q9BY44	184144	159741	194000
B4DQ19	361533	313376	436085
B4DQ42;E7ENF4;Q9HC62	291988	31322	284012
B4DQ47	44974	38096.3	44962
B4DQE4;P10588	173567	317087	369402
B4DQI6;B4DUA9;Q13595	318123	394971	387813
B4DQJ8;P52209	606895	806814	955956
B4DQK0;Q96BI3	97839.5	131555	178568
B4DQL2;Q9HD23;Q9HD23-2	43214.6	35830.5	35143
B4DQM7;Q15036	10861.5	241274	61124.5
B4DQQ4	Filtered	Filtered	Filtered
B4DR12;E9PB19;O60291;O60291-2;O60291-3;O60291-4	Filtered	Filtered	1111.37
B4DR21;Q14703	Filtered	11967.4	7011.05
B4DR31	149688	108506	111967
B4DR61;P61619	206986	289779	397416
B4DR70;P35637;P35637-2	3.30801e+06	4.70325e+06	3.75794e+06
B4DR80;Q9Y6E0;Q9Y6E0-2	225838	230841	281431
B4DR87;Q02809	235433	398814	492280
B4DRD7	122704	96291.5	87546
B4DRF9;P18846	52982.1	76960.8	69886.6
B4DRL5;Q5JVZ5;Q96JJ3	59464.4	43528.6	56539.7
B4DRL9;P24386	21296.4	13485.6	13690
B4DRN7;F5H2A1;Q86YS7;Q86YS7-2	69758.9	91971.3	113750
B4DRN8;Q2TB82;Q5W0Z9;Q5W0Z9-3	Filtered	39222.8	73655.1
B4DRT2;Q92552	179023	266161	435468
B4DRY3;Q7L9L4;Q9H8S9	185631	127251	151312
B4DS44;Q8N1B4	56802.2	49058.8	62629
B4DS52;C9JY70;H0Y997;Q96J42;Q96J42-2	32551.3	67692.5	105434
B4DS80;F5GZN7;Q86V97;Q8WVZ9	9093.21	3315.25	3181.23
B4DS82;Q14457	47276	5752.07	22946
B4DSD4;Q5T8U9;Q5T8V1;Q8N4J0	58071.7	38768.3	48200.4
B4DSM5;G3XAG1;Q96ME7	120833	243311	203819
B4DSN4;E7EML5;E7ET57;Q8NHM5;Q8NHM5-2;Q8NHM5-3;Q8NHM5-4	42339.3	129061	149977
B4DSS3;F5H5A3;Q8IVH8;Q8IVH8-2;Q8IVH8-3	24320.5	15952.1	16680
B4DST0;O43463	36591.3	46202.1	57048.6
B4DT16;F5H2Y4;Q9H165;Q9H165-2;Q9H165-6	31686.8	46275.3	72133.1
B4DT31	472876	453850	394681
B4DT35;Q7Z3B4	197738	271710	325595
B4DT67;Q9NUQ6;Q9NUQ6-2	54217.6	40905	42892.1
B4DT74;I3L295;O75352;Q1HDL3;Q96K24;Q9H3L2	158811	99078.9	147368
B4DTA3;Q96AG3	Filtered	Filtered	36608
B4DTC3;H7BXN2;Q14103-2;Q14103-4	35906	35261.6	14520.3
B4DTE8;C9J7K9;O15162	58959.8	154075	185237
B4DTG2;P26641	4.11814e+06	2.3023e+06	3005682
B4DTG6;Q8ND56;Q8ND56-2	103120	86513	88970.4
B4DTU0;Q13740;Q13740-2	79799	269481	280806
B4DTZ6;P19634;Q5TBB2;Q5TBB3	22872.7	31136.4	33070.1
B4DTZ7;Q68DH5	21104.2	16987.9	31336.4
B4DUB1;H0Y3K1;Q9BWU1;Q9BWU1-2	27590.2	30146.2	30460.2
B4DUD5;E7EWR4;P33240;P33240-2	398260	566016	583895
B4DUE9;F5GY47;Q13530	12912.9	Filtered	8389.94
B4DUS5;Q96B01;Q96B01-2;Q96B01-3	Filtered	Filtered	Filtered
B4DV38;E9PC61;H3BQM0;Q8NDF8	16209.7	25559.3	28174.7
B4DV79;F8W8C8;P55884;P55884-2	740433	624394	897867
B4DVE7;E9PDK5;P50995	414725	351851	372888
B4DVN1;O75190	59868.3	33179.4	47540.5
B4DVP2;Q9Y478	40939.2	22039.3	23450.2
B4DVQ4;Q86Y37;Q86Y37-4	5566.36	Filtered	8772.11
B4DVQ5;Q99613	679349	645401	998384
B4DVZ5;Q92791	55498.5	66721.3	81301.3
B4DW92;Q86WQ0	21496.5	16103.6	16383.6
B4DWD7;Q53TN4	Filtered	Filtered	11509.1
B4DWI1;Q9UJ83	99680	228546	242835
B4DWS0;C9JGX3;Q96F24;Q96F24-2	Filtered	60616.4	Filtered
B4DWT2;Q5JW54;Q5JW58;Q9H410;Q9H410-2;Q9H410-3	52000.4	73140.5	71188.4
B4DWW1;P40616	142659	65021	95515.3
B4DX32;F5GXB3;O60870	50401.9	113061	144874
B4DX68;Q96KB5	124461	107916	72807.1
B4DXA1;I3L3Y9;I3L4X7;Q13227	255238	102256	192652
B4DXL3;H3BPM8;Q13286;Q13286-2;Q13286-3;Q13286-4	36530.4	54511.1	75663.7
B4DXP5	647025	489496	245271
B4DXR9;B4E159;D6RB60;D6RGC2;D6RIY0;E5RGH0;E9PN20;F5H663;Q15928;Q3SXZ3;Q8IYB9;Q8TB69	142006	151199	166165
B4DY08	18678338	21447212	33934104
B4DY26;F8W1R9;P36897;P36897-2;P36897-3	10153.7	9620.65	4729.03
B4DY38;E7EPF0;Q9NP64;Q9NP64-2	92558.5	98058.6	88023.8
B4DY81;Q9UNS2	226800	178070	253834
B4DYB4;Q8NFH5	166600	347676	388701
B4DYM7;Q6UVJ0	36232	27466.7	36423.4
B4DZC3;Q9H0D6;Q9H0D6-2	205683	372806	483020
B4DZI8;P35606	440884	368974	439125
B4DZM7;E7ERJ8;E9PFK9;H7BYE7;Q3HKR1;Q9UJ41;Q9UJ41-2;Q9UJ41-3	238260	243808	196459
B4DZV1;C9K053;F5H175;G5E9H3;Q49AM3;Q49AM3-2	18712.4	19879.9	22563.4
B4DZX6;G8JLA9;H7BYZ6;Q9Y575;Q9Y575-2	73368.1	67068.2	111379
B4E040;P11234	67560.6	103004	118435
B4E0K5;Q16539	100251	72564.2	73514.9
B4E0K9;G5E928;O00754	80645	89512.5	142847
B4E0P8;Q04323	359942	287293	152937
B4E0T7;Q96II8;Q96II8-2	51014.8	16587.5	61376
B4E0X8	1.75184e+06	1.97616e+06	1.91023e+06
B4E0X9;P48553	15592	17250.9	21313.1
B4E0Y9;Q8NBY1;Q9P289	302597	260362	320133
B4E1D3;P02675	Filtered	41405.7	Filtered
B4E1G1;Q9BUN8;Q9BUN8-2	178842	252488	305016
B4E1J0;F5H2F6;F5H6Z1;Q96AQ6;Q96AQ6-2;Q96AQ6-3	16731.3	20170.4	25867.3
B4E1K0	17516.8	24316	28287.3
B4E1N7;P01106	96420.2	83092	112093
B4E1S6;P31431	Filtered	Filtered	Filtered
B4E1W4;E7EU88;Q9P2N6;Q9P2N6-2;Q9P2N6-3;Q9P2N6-4;Q9P2N6-5;Q9P2N6-6	861.416	1349.82	1920.03
B4E241;P84103	4.72294e+06	7757162	9074385
B4E2D5;E7ER46;F5GX46;Q8NEM7;Q8NEM7-2	42392.1	71557.4	88366.7
B4E2G8;F6XBD8;P35221;P35221-2	231024	265250	266621
B4E2J0;Q6P2Q0;Q9NP78;Q9NP78-2	Filtered	916698	Filtered
B4E2N0;Q8WZA0	102339	61433.2	53717.4
B4E2P0;G3V4A5;O75586	36507.2	40080.3	44342.7
B4E2P2;C9JA28;Q9UNL2	127380	48355.9	62560.2
B4E2S7;P13473-2	806398	989302	1127100
B4E2V5;P27105	165700	189063	279734
B4E2X3;Q8N6R0	62991.9	49966.6	66214.9
B4E3E5;Q92997	89570.5	65915.8	58258.3
B4E3J8;F5H277;H0YGN4;Q15208;Q9Y2H1	32061.9	34660.6	37923.1
B4E3T4;F5H357;Q93062;Q93062-2;Q93062-3;Q93062-4;Q93062-5	23290.6	19332.4	38449.3
B4E3W0;G5E9D4;Q96EB1;Q96EB1-2	24144	Filtered	Filtered
B5B2M6;E7EMS4;E7EP33;O95644;O95644-2;O95644-3;O95644-4;O95644-5;O95644-6;O95644-8	Filtered	39941.4	83780.8
B5MBW9;H0YBG0;Q8WYQ3	38796.5	39699.8	171010
B5MBX0;Q96FF9	40066.5	73087.6	92998.3
B5MBZ0;Q9HC35	154326	103148	116368
B5MBZ5;Q9HCN4;Q9HCN4-2;Q9HCN4-3	44581.2	26184.6	37928.6
B5MC00	36864.9	41854.4	57816.8
B5MC02;G5E9C6;Q8NFT2;Q8NFT2-2	Filtered	33062	43910.2
B5MC40;Q86YP4;Q86YP4-2	75553.5	113358	145676
B5MC53;B5MCF8;P39210	Filtered	15280.4	19304.6
B5MC72;Q96DZ1	36980	77057.6	82024.1
B5MCA1;Q96G28;Q96G28-2	25654.2	2175.6	11013.2
B5MCD7;O43759;O43759-2	121680	44275.3	85476.1
B5MCF9;O00541	405099	530286	854535
B5MCG1;P84101	43042.9	31790	32404.5
B5MCQ5;B7Z254;F8WA83;Q15084;Q15084-2	2103596	3293116	3205359
B5MCW3;H7C127;H7C128;H7C179;Q9H0E9;Q9H0E9-2;Q9H0E9-4	65810.8	118102	133797
B5MDE0;Q96AA3	48788.5	65301.4	95745.6
B5MDF5;P62826	8755879	8909576	10824494
B5MDL5;F6TXG5;P53778	991.521	Filtered	1003.44
B5MDQ0;Q2NKX8	66672.4	41615.2	56995.9
B5MDU6;Q9H6V9;Q9H6V9-2	42590.6	63544.5	96986.3
B5ME50;E7EMY0;E7EP16;E7ERA9;Q71SY5;Q71SY5-2;Q71SY5-3;Q71SY5-4;Q71SY5-5	76471.5	63705.4	81011.8
B5ME91;Q53EL6	649823	661719	745376
B5ME97;E7EW69;E7EX04;Q9P0V9;Q9P0V9-2	68717.8	53564.4	57637.5
B5MEB7;Q8WXE1;Q8WXE1-2;Q8WXE1-3	147078	70899.5	165950
B5MEC7;Q9BZL4;Q9BZL4-2;Q9BZL4-3;Q9BZL4-4	1936.07	11122.3	6250.13
B5MEE5;C9JLZ9;C9JM97;C9K0L0;F8W9P9;Q8WXG6;Q8WXG6-2;Q8WXG6-3;Q8WXG6-4;Q8WXG6-5;Q8WXG6-6;Q8WXG6-7	10797.4	7542.64	7087.01
B5MEG5;E7EN22;E7EST9;E7ETS0;E9PEG8	87528.9	75285.5	113640
B6ZDS1;C9J4X5;Q9H160	324.919	Filtered	Filtered
B7WNP8;Q7Z392;Q7Z392-3;Q7Z392-4	35686.8	28839.2	30480.8
B7WNT5;D4PHA3;E2GH20;E9PDK3;F8W742;F8W7T5;G8JLE2;H0YAR8;H0YBC8;H0YBP2;H0YEE5;P36402;P36402-10;P36402-11;P36402-12;P36402-13;P36402-14;P36402-15;P36402-16;P36402-2;P36402-3;P36402-4;P36402-5;P36402-6;P36402-7;P36402-8;P36402-9;Q5JRY3;Q5JRY4;Q5JRY5;Q9NQB0;Q9NQB0-10;Q9NQB0-2;Q9NQB0-3;Q9NQB0-4;Q9NQB0-5;Q9NQB0-6;Q9NQB0-7;Q9NQB0-8;Q9NQB0-9;Q9UJU2;Q9UJU2-3;Q9UJU2-5;Q9UJU2-6	Filtered	44828.6	35899.4
B7WP27;Q9HCG8	97573.1	101571	206771
B7WPG3;C9J9G0;Q5JB52;Q8WVV9;Q8WVV9-4	270264	932583	1.05192e+06
B7Z1I8;O75461	13223.8	23687.1	37449.1
B7Z1J2;D6RAC5;D6RH18;E9PB74;E9PDA8;P81877;Q9BWW4;Q9BWW4-2;Q9BWW4-3	32912.1	30242.8	54334.4
B7Z1J9;Q8NB37	258228	385077	401757
B7Z1T1;H7BYE5;O00258;O00258-2	32899.2	37933.5	51177.6
B7Z1T6;E5RHV0;E5RHY8;E5RI52;Q6NTE8;Q6NTE8-2	Filtered	727096	612333
B7Z1Y4;B8ZZV9;B8ZZX2;Q9H8M1	8039.6	10474.8	14051.1
B7Z202;E9PEY4;F5GZG4;G5E9F6;O60941	Filtered	142369	161707
B7Z287;Q9NP50	35033.5	44616.2	60995.3
B7Z2A4;P18433;P18433-2;P18433-3;P18433-4	35551.3	74791.5	75221.3
B7Z2A7	21234.2	36985.6	32542.4
B7Z2D6;P35520;P35520-2	294842	301401	322548
B7Z2I1;C9J3K0;F5H6X3;Q96JH8;Q96JH8-1	Filtered	Filtered	Filtered
B7Z2L7;B7Z2U2;F5GXH5;F5H3S6;Q6ZVM7;Q6ZVM7-2;Q6ZVM7-3;Q6ZVM7-4	33148.2	28893.8	29103.6
B7Z2R4;E9PEH6;G5E9K6;O43556	Filtered	13766.3	22765.2
B7Z2S5;E7ESI6;Q16881;Q16881-3;Q16881-4	193305	161092	143504
B7Z2T7;O15075;O15075-2;Q5VZY9	15442.7	11078.7	16387.2
B7Z2Y2;B7Z7N2;F5H1E5;Q14746;Q14746-2	51402.6	30411.6	32457.5
B7Z2Y5;O75582	87199.1	76962.8	82543.9
B7Z355;C9IZI7;C9J7Z4;G5E9Q3;Q8NCE0;Q8NCE0-2;Q8NCE0-3	25026.7	9659.99	24781.4
B7Z367;D6RJ07;Q9UL40	84659.4	139058	142587
B7Z382;P49902	69433.1	34153.3	41468
B7Z3K8;Q9Y2Z9	610747	573731	798961
B7Z3N3;Q6P1A2	82164	77497.8	99857.3
B7Z3P9;B7Z4N7;F5H2Q9;F5H7Q0;G5E9G3;Q8IXQ5;Q8IXQ5-2	15308.7	22242.7	28489.8
B7Z468;B7Z574;E7ES10;E7ESM9;E7EVY3;E9PCH5;G5E946;G5E9D3;P20810;P20810-2;P20810-3;P20810-4;P20810-5;P20810-6;P20810-7	145896	57833.2	31607.9
B7Z473;F5GYS0;H0YGC8;Q8NCS7;Q8NCS7-2;Q8NCS7-3	Filtered	Filtered	Filtered
B7Z4B9;Q86SQ9;Q86SQ9-2;Q86SQ9-3	26994	31834.3	40012.6
B7Z4K6;O00115	191255	143321	130619
B7Z4L1;B7Z4U3;C9JU30;E7EPD9;H7BXS2;Q9NRC1;Q9NRC1-4	Filtered	Filtered	Filtered
B7Z4M2;O75554	47976.7	62300.4	71577.1
B7Z4Q3	418551	488975	403332
B7Z4R5;E7EPF7;Q99571	Filtered	15528.2	31689.3
B7Z4S8;Q99538	47175.4	109319	62504.4
B7Z4U0;Q969M1	Filtered	28699.2	19951
B7Z4V2;P38646	3.14461e+06	5151191	7900551
B7Z4V9;Q9BT40;Q9BT40-2	31200.4	24549	30055.9
B7Z4X2;E7EQB2;E7ER44;P02788	99200.4	186244	223593
B7Z4Y6;P05186;P05186-2	Filtered	Filtered	12303.4
B7Z549;F5H7E1;P19827	Filtered	Filtered	Filtered
B7Z560;Q9NV88;Q9NV88-2	47859.8	75777.1	92936.4
B7Z5B0;E7EMV7;E7EPY1;E7ERB0;E7ET96;E7EW15;F5GYD7;F5H4X3;Q15025;Q15025-2;Q6N077	Filtered	Filtered	1863.21
B7Z5J4;Q9UI42;Q9UI42-2	Filtered	Filtered	Filtered
B7Z5N6;B7ZBU3;E7EQG4;E9PDG7;H0Y6Y1;Q5T1V6;Q5T1V6-2;Q5T1W1	332235	Filtered	211482
B7Z5R1;G3V2I6;G3V3X1;P31749	147775	100262	114682
B7Z5U5;Q9H4Z3	20301.7	21227.4	26103
B7Z5W1;Q9Y624	52172.1	119599	155687
B7Z5Z2;P62070	121920	166675	257174
B7Z660;C9JS40;Q5VZ89;Q5VZ89-2;Q5VZ89-3;Q5VZ89-5;Q5VZ89-6	12851.7	12125.4	15021.1
B7Z6B8;Q16698	Filtered	134542	179897
B7Z6C0;H0YFA4;P52943	19304.1	20996.2	14203.2
B7Z6F5;C9JFB2;Q9Y548	12112.2	12096.1	20837
B7Z729;Q92484	15705	27683.7	25620.3
B7Z765;Q9UL01	5995.77	9161.63	49577.2
B7Z7D3;Q9BXW6	132509	Filtered	Filtered
B7Z7P8;P62495;Q96CG1	809666	563141	629726
B7Z7V7;F5GYW7;G5E9F1;Q96RG2;Q96RG2-2	39392.6	26151.5	36041.7
B7Z7X8;Q8NHH9	49374	100844	163175
B7Z800;P55263;P55263-2	122708	77528.3	115879
B7Z806;P13807;P13807-2	120437	78062.8	120339
B7Z817;Q15392	86769.3	99764.9	139407
B7Z831;D2DFB0;F5H4A4;Q9NZH0	Filtered	Filtered	22887.7
B7Z8C9;Q5TAQ9	66857.3	49776.7	62033
B7Z8G2;Q13451	133788	130546	132379
B7Z8R4;E9PCX3;Q15723;Q15723-1;Q15723-2;Q15723-3	33018.8	49933.8	58439.1
B7Z8T0;F5H203;Q00536	64617.7	57518.4	93188.1
B7Z8V9;B7Z929;Q9H336	Filtered	Filtered	Filtered
B7Z8Y7;O94762	20466.9	66066	52954.1
B7Z976;O60704	Filtered	Filtered	Filtered
B7Z984;F8VPI1;F8VPZ7;F8VQQ5;F8VQW0;F8VR05;F8VSI7;F8VVJ4;F8VX73;F8W086;F8W1G3;F8W201;P55061	16935.2	29681.2	48450.8
B7Z9G5;Q5VW32	173568	155584	168815
B7Z9I3;O75787	95665.2	95979.5	148204
B7Z9L2	Filtered	Filtered	Filtered
B7ZAA0;E7EQE2;E9PC65;E9PH88;P54277;P54277-3;Q3BDU3	32184.8	34594.4	17250.9
B7ZAS8;F5H2X7;H0Y5D5;Q5SYW2;Q9BTG3;Q9ULV3;Q9ULV3-2	53711.7	84350.3	105534
B7ZAX5;Q01415;Q01415-2	39415.2	31997.7	37010.3
B7ZB80;P21953	71811.7	231000	262533
B7ZC38;Q9NR46	55573.9	41015.1	38434.8
B7ZKJ8;E9PGN5;F5H194;Q14624;Q14624-2	Filtered	Filtered	171857
B7ZKK9;Q16537	77878.8	84960.3	95896.2
B7ZKM0;Q15020	256120	271571	294051
B7ZKM8;O95487;O95487-2	108146	116738	143281
B7ZKN0;Q92859;Q92859-2;Q92859-3	20215.8	26613.7	28378
B7ZKQ9;Q8WTV0-2;Q8WTV0-4	89247.1	103542	211786
B7ZKS7;Q86UV5	145588	194454	246243
B7ZKT7;Q9BQS8	97587.4	113638	93531.1
B7ZKZ4;E7EWY8;P43694	22456.8	25470.2	35722.8
B7ZL00;D6REX3;H7C2W3;O94979;O94979-2;O94979-3;O94979-4;O94979-6;O94979-8	343836	265431	346579
B7ZL11;C9JY66;Q9BZ95;Q9BZ95-2;Q9BZ95-4	70638.2	84735.6	93792.3
B7ZL31;F8WBF5;P49759;P49759-3;Q9HAZ1	48092	56620	84904.6
B7ZL88;Q8N8Q8	Filtered	16684.1	17028.9
B7ZLE7;P53355;P53355-3	12691.5	21142.5	163583
B7ZLM8;H0YNM1;P30047	30729.9	23357.3	Filtered
B7ZLN5;Q17RB6;Q9ULD4	59153.9	72588.7	120615
B7ZLQ8;E5RJM0;Q17RY0;Q17RY0-2	20690.5	42693.1	25106.9
B7ZLX3;E7EUA5;F5GWS0;Q7Z460-2;Q7Z460-3	63608.5	43472.4	56986
B7ZLZ2;Q9BZQ6	13667.1	37648.6	38100.1
B7ZM82	84892.4	175821	221168
B7ZMG0;E9PGC5;F5GXI4;Q15262;Q15262-2;Q15262-3;Q5TG12	20568.8	32936.4	38530.6
B7ZMI4;E7EPZ1;F5H1U9;O75970;O75970-2;O75970-3	21205.5	28924.7	32694.5
B8QGS9;Q99959;Q99959-2	37152.8	50760.5	88520.2
B8ZZ87;H7C173;Q6NZ67	117003	99910.5	98014.6
B8ZZA1;B8ZZQ6;B8ZZW7;H7C2N1;P06454;P06454-2	169692	106044	83518.1
B8ZZC8;B8ZZE3;B8ZZY8;E7EMN2;F5GXZ1;F5H4E8;Q9NRN9	25441.4	39482.4	42990.3
B8ZZD4;E7ENV2;Q86VP1;Q86VP1-2	Filtered	Filtered	Filtered
B8ZZF6;C9J128;C9J173;C9J2Z6;E7ENF2;E7ET59;E7EUX4;P49441	62003.4	45583.8	57481.9
B8ZZJ1	45873.3	50581	69875.7
B8ZZJ9	191904	159746	267402
B8ZZN6;P63165	942711	1.59499e+06	1.18079e+06
B8ZZT7;Q9UK76;Q9UK76-2	439854	319690	240314
B8ZZV6;B8ZZY4;Q8WV83;Q8WV83-2	Filtered	Filtered	Filtered
B8ZZW9;Q8N3F0;Q8N3F0-2	Filtered	31134.5	26293.4
B9A018;Q53GS9	272113	424867	550017
B9A054;Q8TEB9;Q8TEB9-2	Filtered	Filtered	91211.4
B9EG97;E9PEP7;P08048;P08048-2;P08048-3;P17010;P17010-2	Filtered	33492.2	28889
B9EGA3;Q92925;Q92925-2;Q92925-3	194648	294001	353287
B9EGP5;F8VWA6;F8W1Z6;Q7Z3U7;Q7Z3U7-2;Q7Z3U7-3;Q7Z3U7-4	67031.1	21081.3	39168.8
B9EK38;E7EQJ8;Q6GYQ0;Q6GYQ0-2;Q6GYQ0-4;Q6GYQ0-5;Q6GYQ0-6	34849.6	44415.7	90021.3
B9ZVR8;C9JV64;Q70CQ2;Q70CQ2-2;Q70CQ2-3	16143.2	45392.1	55567.2
B9ZVV8;E7EN68;Q53H47	14081.2	17079.1	16914.3
C0H5Y7;Q16611	71143.8	105967	73759.8
C4AM86;Q92764	Filtered	Filtered	Filtered
C4AMA3;I3L2N9;O76011	Filtered	23323.2	Filtered
C4AMC7;Q6VEQ5	149347	143908	135307
C4P093;C4P0B0;E2QRA4;F5H1F1;Q5T409;Q9NRI5;Q9NRI5-2;Q9NRI5-3;Q9NRI5-4;Q9NRI5-5;Q9NRI5-6;Q9NRI5-7;Q9NRI5-8	Filtered	Filtered	2815.03
C6GKU9;Q96HR3	Filtered	35081	41265.8
C9EI59;Q9H7T9	Filtered	Filtered	Filtered
C9IY53;F8W8D3;Q14493	40352.8	27996	25242.5
C9IYG0;H7C1Z7;H7C270;Q9GZU7;Q9GZU7-2	14574	25662.3	42094
C9IYL4;P29083	115196	188404	363220
C9IYN9;E2QRN5;F8WEJ9;Q6GMV2	71462.9	35550.2	46897.2
C9IZI4;H7BXR8;H7C5Z9;Q14CB8;Q14CB8-2;Q14CB8-3;Q14CB8-5;Q14CB8-6;Q14CB8-7;Q8NA01	24158.2	28386	36920
C9IZU6;Q969T4;Q96LR5	362938	176835	226920
C9J016;Q9H977	80968.5	63174	79391.7
C9J066;Q8N4C6;Q8N4C6-10;Q8N4C6-2;Q8N4C6-4;Q8N4C6-7	30420.2	39985	42592
C9J0E4;P01040	215556	76773.3	80562.4
C9J0F0;E7ETP1;E9PFD3;F5GYL1;G5E965;G5E9V8;H0Y882;Q8NAN6;Q9H334;Q9H334-2;Q9H334-3;Q9H334-4	7087.23	5518.52	4302.2
C9J0I9;Q86WB0;Q86WB0-2	85490.5	78946.4	89471.8
C9J0J0;Q96EE4	5595.41	9661.9	10462.7
C9J0J7;G5E9Q6;P35080-2	683833	457057	363449
C9J0Q5;C9J239;C9J7T7;C9JE98;C9JFD3;C9JJF6;Q9Y618;Q9Y618-3;Q9Y618-4;Q9Y618-5	Filtered	14784.5	24350.5
C9J0W7;C9JNM5;F8W782;Q96A54	46779.1	26879.1	40951.3
C9J114;C9JV08;P17181;P17181-2;P17181-3	Filtered	Filtered	Filtered
C9J154;F2Z3A6;F8W8C2;Q9HBM0	22266.9	19184.9	20919.7
C9J164;C9K0J5;Q70E73;Q70E73-2;Q70E73-3;Q70E73-4;Q70E73-5;Q70E73-6;Q70E73-7;Q70E73-8;Q70E73-9	14208	10763	12978.6
C9J1C6;C9J391;F8WBU5;H7C426;Q9P0P0	182248	102108	98284.3
C9J2F8;Q5JS54	38212.4	24632.6	28704.1
C9J2G7;C9JCG1;C9JRS3;C9JTC5;E7EN86;E7ER34;E9PJF2;E9PLN4;E9PLS7;E9PMY8;E9PPB0;E9PS81;P52747;P52747-2	Filtered	Filtered	Filtered
C9J2K4;Q16864	82561.1	77306.3	170693
C9J2P0;C9J8K2;H7C061;P51965	1.09518e+06	533649	584638
C9J2U4	121856	243068	306474
C9J2Y9;P30876	224614	172540	251702
C9J384;E9PHS3;Q9BQ75	185841	217057	237401
C9J3D7;E7EQF2;Q9UKG9	7201.83	15706.4	28507.8
C9J3F9;C9JW41;Q9NQ55;Q9NQ55-2	271373	346348	555972
C9J3L7;C9J7N1;C9JYJ8;C9JZE3;E7EVL6;Q9BWE0	17025.9	14338.7	20064.8
C9J3Q3;C9J6N5;C9J6Y8;C9JP05;C9JQ40;C9JW51;C9JYP1;Q9H098;Q9H098-2	10074.5	7196.85	Filtered
C9J406	14049.3	27209.5	19750.3
C9J412;Q7Z736;Q7Z736-2;Q7Z736-3;Q7Z736-4	12172.4	34591.4	38552.7
C9J436;G3XAL7;Q96M27;Q96M27-2;Q96M27-3	188321	154340	275005
C9J4G0;F8W038;Q8IXM2	262062	297239	269804
C9J4K5;C9JSP0;F8W8A5;F8WD19;H7C006;H7C1C1;H7C1M7;H7C304;Q9NYP3;Q9NYP3-2;Q9NYP3-3	19561.7	19097.6	25221.6
C9J4P6;E7EUS0;Q6E0U4;Q6E0U4-2;Q6E0U4-3;Q6E0U4-4;Q6E0U4-5;Q6E0U4-6;Q6E0U4-7	Filtered	Filtered	Filtered
C9J502;D0UFD1;D0UFD3;D3YTI0;P55327;P55327-2;P55327-3;P55327-4	176292	89797.7	66954.1
C9J5C7;C9JU06;C9JZ00;F8WC44;Q86W33;Q86W33-2;Q86W33-3	Filtered	Filtered	Filtered
C9J5J4;H0Y322;H7C4T7;Q5TKA1;Q5TKA1-2;Q5TKA1-3	35160.1	74789.7	73634.3
C9J5N1;Q9BTE6;Q9BTE6-2;Q9BTE6-3	113430	219245	171728
C9J5X1;P08069	83754.1	135605	179304
C9J6I6;C9JMV9;Q03154	41144.9	40573.6	34325.4
C9J6P4	113577	131318	204653
C9J6W2;Q96Q89;Q96Q89-2;Q96Q89-3	9753678	2646805	1.224e+06
C9J712;P35080	309255	322817	246504
C9J7E5;Q9Y5L0;Q9Y5L0-1	128373	95893.9	126117
C9J7E8;Q9UL63;Q9UL63-2	18527.7	10565.3	13043.9
C9J7M1;O95749	73999.9	54910.3	67147.9
C9J8D0;C9JA69;F8W9C0;Q8WY36;Q8WY36-2	12217.7	41286	42502.2
C9J8E1;Q16644	85869.9	56527.1	67606.4
C9J8U1;F5H1H6;F8WAN1;H0Y3Q3;Q69YQ0	18304.5	33569.7	56914.3
C9J959	71592.5	79219.1	62061.8
C9J9I1;Q9C0D9	32638.7	33560	33010.1
C9J9K3;P08865	5.89516e+06	5783288	7018449
C9J9V6;O75414	54704.5	104121	126862
C9JA05;D6RD17;D6RHJ6;P01591	Filtered	Filtered	Filtered
C9JA08;Q96D46	148172	73520.2	79382.2
C9JA65;O00458	22729.9	33100.4	29340.1
C9JA77;P13646-2	Filtered	Filtered	22770.7
C9JAB2;G5E9M3;Q16629;Q16629-2;Q16629-3	3.36961e+06	5171118	5.66559e+06
C9JAK5	395717	198451	262076
C9JAL9;Q9BZE9;Q9BZE9-2;Q9BZE9-3;Q9BZE9-4	86725.8	73881.7	74192.6
C9JAX1;Q16595	52068.2	65080.4	71426.8
C9JB30;Q9UPY8;Q9UPY8-2	54031.6	34700.5	37238.9
C9JBG5;Q8NBJ9;Q8NBJ9-2	Filtered	41288.6	22647.2
C9JBL1;Q9Y6A9	189556	120914	100998
C9JBY7;F5H3P2;Q9Y291	242147	296278	326610
C9JBZ4;Q9BT25;Q9BT25-2	26969.1	32995.3	23579.1
C9JC60;G5E977;Q6XQN6;Q6XQN6-2	47387	34962.8	42178
C9JC84;C9JEU5;P02679;P02679-2	Filtered	Filtered	Filtered
C9JCC6;E9PNC7;Q14919;Q14919-2	223980	169537	153547
C9JCW7;C9JE12;Q9BVT8	55814.3	76846.3	151237
C9JD84;E7EV71;Q14766;Q14766-2;Q14766-3;Q14766-4;Q14766-5	Filtered	Filtered	Filtered
C9JDG0;Q9NSV4	39521.7	56487.8	77887.7
C9JDM9;H0Y7R9;Q9NYQ6;Q9NYQ6-2	39381.3	46287.9	64383.9
C9JE15;H7C4I2;Q7Z695	Filtered	Filtered	Filtered
C9JEH3;C9JG97;Q13685	379094	238725	278714
C9JEJ2;P49585	90637.4	58623.1	46570.6
C9JF17;P05090	56169.8	Filtered	Filtered
C9JF58;H7C0S2;Q8WVF1;Q8WVF1-2;Q8WVF1-3	9149	5138.72	8413.74
C9JFM0;P23471;P23471-2	82781.2	48498.4	Filtered
C9JGP9;E7ESZ7;O95299	363189	781042	1.06411e+06
C9JHX9;Q2TB10	22485.6	33394.3	43678.2
C9JI34;C9JSK7;E5RHG5;E7EW39;Q7Z2H8	3419.57	Filtered	Filtered
C9JIE4;O15061;O15061-2;O15061-3	Filtered	Filtered	Filtered
C9JIF9;P13798	264202	222809	253837
C9JIQ2;Q6IQ49;Q6IQ49-2	43043.3	55345.9	49776.5
C9JIZ8;O15119;O15119-2;O15119-3	Filtered	18752.6	Filtered
C9JJ19;P82930	570203	980226	1.32642e+06
C9JJ91;Q5T2R2;Q5T2R2-3	41389.7	24984.4	27376.4
C9JJN9;Q8N3P4;Q8N3P4-2;Q8N3P4-3	Filtered	30271.8	41550
C9JJV1;Q9Y5U2;Q9Y5U2-2	67093.5	89904	72806.5
C9JJX6;E9PDC3;O00192;O00192-2	15359.6	14474.6	16709.3
C9JK10;G5E9H1;P23229;P23229-2;P23229-3;P23229-4;P23229-5;P23229-6;P23229-9	26794.5	92159.9	13754.1
C9JKA9;H7BYN9;Q9NS87;Q9NS87-2;Q9NS87-4	38687.5	37848.4	42454.8
C9JKC4;Q969T7	63221.3	81212	12101.1
C9JKL2;C9JPX5;O95772	12165.3	54157	74845.4
C9JKU3;Q9P1Q0;Q9P1Q0-2;Q9P1Q0-4	Filtered	Filtered	4142.86
C9JKX0;F8VVB8;I1E4Y4;Q9Y4F3;Q9Y4F3-3;Q9Y4F3-4;Q9Y4F3-5	Filtered	Filtered	Filtered
C9JL12	Filtered	Filtered	99396.2
C9JL36;Q8WUT9;Q8WUT9-2	Filtered	Filtered	47251.7
C9JL75;Q12767;Q12767-2	Filtered	Filtered	Filtered
C9JLE3;P51654	Filtered	91413.7	24556.5
C9JLU1;P52434	293595	185717	186336
C9JLW8;I3L2L5;I3L4Q0	210466	149288	120226
C9JLX3;E7EM89;O60266	Filtered	Filtered	26086.6
C9JLZ0;O95104;O95104-2	194608	212129	200623
C9JMG9;E9PG60;H7C107;Q5JU85;Q5JU85-2;Q5JU85-3;Q6DN90;Q6DN90-2	Filtered	Filtered	150317
C9JMP5;C9JT95;F8WAF5;H7C0W4;Q96AH0;Q96AH0-2;Q96AH0-3;Q9BQ15	78951.2	144903	144961
C9JMZ0;D6R942;D6R9J8;D6RAH2;D6RB91;D6RC63;D6RCM6;D6RG14;D6RG21;D6RJA7;D6RJG6;F8W7V7;F8W966;H0YM62;Q02078;Q02078-2;Q02078-3;Q02078-4;Q02078-5;Q02078-6;Q05BX2;Q06413;Q06413-2;Q06413-3;Q06413-4;Q14814;Q14814-2;Q14814-3;Q14814-4;Q14814-5;Q14814-6;Q5T9U4	10687.8	12915.5	11274.9
C9JN85;Q13309	147989	99000.9	151858
C9JNE2;Q9Y530	54699.2	52207.4	55239.4
C9JNE5;P58340;P58340-2;P58340-3;P58340-4;Q2TLE3	1126.04	Filtered	Filtered
C9JNZ0;C9JRY4;Q96IW7	26256.8	58531.4	57641.1
C9JP00;Q9NR56	111005	147955	104363
C9JP52;Q92609	23151.4	22481.3	25304.1
C9JP84;E9PB45;F8VUW5;Q15038	11486	Filtered	3091.65
C9JP85;Q16656;Q16656-2;Q96AN2	Filtered	158586	179903
C9JPG0;Q12765	115934	110886	99426.7
C9JPL0;Q9UK58;Q9UK58-4	26267.3	31885.4	40700.7
C9JPP2;H7BXP1;Q9NYR9;Q9NYR9-2;Q9NYR9-3	62088.7	71192.3	79431.9
C9JQ25;Q0VFZ6	99943.9	158197	64266.4
C9JQ41;H7C525;Q4VC31	292978	649891	534734
C9JQV6;E9PB63;E9PE62;E9PEE0;F5H096;F5H211;F5H4C0;F5H7N7;G3V3R7;G3V4U9;P54252;P54252-2	78900.5	58091.1	63050.5
C9JQW2;F8WE30;F8WF93;H7BZZ2;H7C0X4;Q92685	26330	40027.8	63325.6
C9JR56;Q3ZB87;Q9UPW6	133506	132541	228160
C9JR60;Q8IX18;Q8IX18-3	72897	81862.5	127446
C9JRD2;C9JXB9;P25686;P25686-2	Filtered	Filtered	Filtered
C9JRJ5;Q9UGP4	60140.3	Filtered	Filtered
C9JRS0;P42575;P42575-2	15122.8	8615.03	8101.12
C9JRZ6;Q9NX63	236020	565454	576320
C9JS35;Q92890;Q92890-1	264433	333570	401667
C9JS86	482547	625763	656924
C9JSC3;H7C2K2;Q9NZQ3;Q9NZQ3-2;Q9NZQ3-3;Q9NZQ3-4;Q9NZQ3-5	32097.1	31819.6	46630.5
C9JSZ2;Q96NT5;Q96NT5-2	Filtered	15532.6	30033.5
C9JTE9;G5E9L4;H7C5E2;Q9UHQ4	11648.6	13510.3	12480.3
C9JU26;F5H4H2;P56134;P56134-2	Filtered	Filtered	2492.25
C9JU51;Q93063;Q93063-2	13180.1	26539.9	41867.8
C9JUF4;O43768;O43768-3;O43768-5;O43768-7	436956	387682	214930
C9JUT4;Q93052	56436.4	19001.4	32264
C9JUU1;F5H6I7;Q6DD88	Filtered	Filtered	Filtered
C9JV30;E7EQS0;P20839;P20839-3	190013	171540	175684
C9JV86;F8VV56;F8VWK8;F8VZE2;F8W022;P08962;Q8N6Z9	33146.6	11301.2	30216.6
C9JVM4;E5RHU8;E5RIL0;E5RJS9;E9PHP8;H0YBC1;O95214	16713.8	Filtered	Filtered
C9JVN5;E9PD49;F8WAA2;Q9Y6N7;Q9Y6N7-2;Q9Y6N7-3;Q9Y6N7-4;Q9Y6N7-5	26198.7	30552.6	40063.9
C9JW63;Q9BSB7;Q9Y2D2;Q9Y2D2-2	12977.7	20738.8	25873
C9JWD3;Q9BQE9	81188	101001	104222
C9JWJ8;F8W8H9;Q14938;Q14938-2;Q14938-3;Q14938-5	Filtered	20668.7	27499
C9JWM7;P59998	862520	582274	796053
C9JWR9;E9PER6;O15530;O15530-3	21369.7	15545.5	26442.1
C9JWV4;H7C0G7;Q9H9Q4;Q9H9Q4-2	50876.8	25931.7	22428.8
C9JX01;Q9UM00;Q9UM00-2	351027	373649	547342
C9JX46;O95905	43804.4	40704.6	47536.8
C9JXA2;P29320	41985.8	64047.2	77556.3
C9JY04;Q9BU79	Filtered	Filtered	Filtered
C9JYJ4;Q8IUH4	383448	74872.9	131910
C9JYM0;O75817	75204.6	67778.5	77680.4
C9JYQ9;H0Y8C2;Q6P5R6	60106.8	67065.8	70606.1
C9JYS5;Q96ET8-3;Q9NYZ1	42044.6	35582.5	26898.5
C9JYY6;E9PDA4;F5GYD3;F8W774;F8W775;Q92823;Q92823-2;Q92823-3;Q92823-4;Q92823-5	20463.6	43963.4	43522.4
C9JZI4;Q9NP80	166193	159925	35831.8
C9JZR4;E9PB03;Q9NP61	44308.6	31554.9	34671.8
C9K005;Q9H330;Q9H330-2;Q9H330-4	35215.7	55271.1	63842.3
C9K0X5;H3BQR0;H3BRI5;H3BSK1;H3BTA6;O95149	12382.8	9224.93	10434.6
D3DNV8;Q8IVL5	Filtered	Filtered	Filtered
D3DU85;Q15599;Q15599-2	30210	43997	34352.8
D3YTA9;F6U1T9;P63098	30279.8	37163.8	21150.9
D3YTB5;P51617;P51617-2;P51617-3	84235.3	63963.1	78757.4
D6R933;D6R980;D6R9F6;D6RGD0;D6RIZ3	66983.5	304709	23610.5
D6R938;E9PBG7;E9PF82;Q13557;Q13557-10;Q13557-11;Q13557-6;Q13557-8	193701	136105	211509
D6R9E3;D6RCT6;D6RIA0;Q9BWT6	29120.3	40025.2	38777.8
D6R9L8;D6RD98;D6RDG6;Q6ZTZ1	Filtered	Filtered	13571
D6R9M8;D6RAE5;Q5Q9G5;Q5Q9G7;Q5Q9G8;Q9UBT6;Q9UBT6-2;Q9UBT6-4	273262	402257	280223
D6R9Q4;D6RAY6;Q96MT8;Q96MT8-2;Q96MT8-3;Q96MT8-4	3873.72	12650	21156.9
D6R9Q7;E7ESU6;Q8NBW4;Q8NBW4-2	52247.3	45506.8	87389.6
D6R9S7;D6RDB0;D6RDM3;D6RHE3;E7ENY4;E7ES98;Q96GZ6;Q96GZ6-2;Q96GZ6-5;Q96GZ6-6;Q96GZ6-7;Q96GZ6-8	6470.53	2415.73	2665.92
D6R9S8;D6RA76;D6RAZ7;D6RC11;D6RCE6;D6RCR8;D6RD48;D6RDI6;D6RDP6;D6RDY1;D6RFX6;D6RHI6;D6RHU6;D6RIU2;H0Y8T9;Q9NY35;Q9NY35-2	19551.3	23178.3	22745.1
D6R9W2;H9KV97;Q8NEC7	9137.49	7782.35	7007.83
D6RA47;D6RE79;D6RIZ4;Q14728	21827.8	88472.1	101630
D6RAD4;P50613	108313	108301	72716
D6RAK8;D6RBJ7;D6RF35;P02774;P02774-2	Filtered	Filtered	Filtered
D6RAU4;Q9H8E8	Filtered	8656.42	15808.5
D6RB01;Q9Y6X4	70236.9	42482	38612.9
D6RB59;Q6P2E8	89393.1	73551.3	97184.9
D6RB81;F8W9N1;Q9UHK6	Filtered	Filtered	10965.6
D6RBB0;O60683	Filtered	19148.5	46118.1
D6RBB5;Q99735	429676	342123	378661
D6RBI1;D6RFY6;D6RJ86;H0Y8S5;Q96H20;Q96H20-2	76686.8	66048.3	74474.8
D6RBN9;Q8IUW5	29195.9	129449	Filtered
D6RBR7;Q9Y3S2	10657.8	28408.2	16123.6
D6RBS5;Q8IZ81	113224	101856	133434
D6RBW1;P06730;P06730-2;P06730-3	540355	449403	461514
D6RC10	159559	160175	226291
D6RC82;D6RFZ2;Q0IIM8;Q0IIM8-2;Q0IIM8-3	15190.2	Filtered	Filtered
D6RCD0;Q8NBQ5	48283.2	62901.8	106186
D6RD20;D6RJC2;G3V1P6;P30307;P30307-2	19077.3	24934.7	37167.4
D6RD25;Q9Y255	Filtered	26966.6	35945.6
D6RDI3;H0Y8R4;H0Y919;Q9BVS4	88010.5	Filtered	68651.5
D6RDY7;Q9UJT9	Filtered	99738.1	Filtered
D6REA1;Q9H173	27785.6	23924	53549.6
D6REA6;F6TF62;F6VM53;H3BMF3;H3BNB2;H3BNT3;H3BQ55;H3BRT2;H3BS73;Q96S19;Q96S19-2;Q96S19-3	81106.6	161753	Filtered
D6REB5;P35475	Filtered	5444.46	Filtered
D6REN6;P12081	376731	299140	354010
D6REQ6	Filtered	Filtered	Filtered
D6RER5;D6RGI3;Q9NVA2;Q9NVA2-2	360372	332650	335340
D6REX7;D6RHD2;O43609	Filtered	Filtered	19609.8
D6RF48;Q9P2W9	97856.5	103267	140702
D6RFI3;D6RGI4;E7EQR8;Q9GZM5	155398	392311	216480
D6RFI4;Q99697;Q99697-2;Q99697-3	61474.5	40278.1	35838.1
D6RG18;D6RHI7;P51946	20387.4	22055	24309.8
D6RGG3;Q99715;Q99715-4	Filtered	Filtered	Filtered
D6RGK9;H0Y9C1;H0Y9Z5;Q96LI5;Q9ULM6	81570.8	74845.5	118802
D6RGV5;D6RIE3;P14406	1.32875e+06	1.98608e+06	2.52785e+06
D6RHE1	78039.2	67841.5	75494.7
D6RHG7;H7BXS5;Q86VE9;Q86VE9-2;Q86VE9-3;Q86VE9-4	Filtered	5791.9	Filtered
D6RHI9	164683	239843	163816
D6RI04;Q53HV7	6604.91	8001.43	9393.29
D6RIA1;E9PH99;Q9Y4E5;Q9Y4E5-2	47028.4	90846.8	95968.7
D6RIW7	Filtered	Filtered	Filtered
D6RJ90;Q9Y6G5	Filtered	Filtered	Filtered
D6RJG9;Q9Y5W7;Q9Y5W7-2;Q9Y5W7-3;Q9Y5W7-4	Filtered	40778.4	41949.3
D7UEQ6;H7BXT2;Q9BSW2;Q9BSW2-2	Filtered	13085	20409.1
D7UEQ7;D9N155;F8W7N8;H0Y8B3;Q96HN2;Q96HN2-2;Q96HN2-3	43973.8	41483	55026.2
E0CX11	Filtered	13877.6	19136.1
E1B6X0;P43007	28015.4	Filtered	36839.3
E2QC23;O75600	38682	39573.6	34257.2
E2QRD4;Q6ZRQ5	48570.8	59123.7	75515.6
E2QRD5	59822.9	47816.6	38929
E2QRF9;O75496	92567.4	43139	96776.8
E2QRH7;F6SH78;Q5TGH5;Q9NYP7	98470.9	138002	219739
E3W978;F8WCW5;O75330;O75330-2;O75330-3;O75330-4	13894.8	Filtered	Filtered
E5KQS6;E9PK26;E9PMW6;Q9NRS6;Q9NRS6-2	68982.3	Filtered	23992.4
E5RFG5;E5RFT3;E5RGA0;E5RGW5;E5RIW0;E5RJH2;G3V105;O14920;O14920-3	65421.9	56321.1	Filtered
E5RFJ1;Q96MF7	60557.4	68773.2	76337.6
E5RFY4;E5RGP2;E5RIV2;G3V140;G5E992;Q5T6A0;Q8IYX8	Filtered	Filtered	Filtered
E5RG17;Q6P1N9	82635	169736	110280
E5RGN3;E5RIM7;O00244	177587	109838	50686.2
E5RGS2;E5RJV5;Q9H6H4	76952.2	142695	198058
E5RGT2;Q96MH6;Q96MH6-2	30202.8	93627.3	122527
E5RGZ2;H0YC02;H0YKJ1;Q6NT76;Q6NT76-2;Q6NT76-3;Q6NT76-5	32381.7	52582.8	64512.9
E5RH35;E5RJA8;E5RJP8;E5RJZ7;Q9Y646	Filtered	Filtered	Filtered
E5RHG8;Q15369	283921	398344	353068
E5RI87;Q86XS8	Filtered	Filtered	Filtered
E5RIA9;E5RJK1;H0YAN3;Q9UJ68;Q9UJ68-2;Q9UJ68-3;Q9UJ68-4;Q9UJ68-5	33614.9	31725.8	25200
E5RIE8;O43513	36926.9	32141.5	33642.7
E5RIH5;E5RIZ0;Q6NXR4	10893.4	16722.2	16262.5
E5RIQ5;Q9BX73;Q9BX73-2	15909.4	10889.4	6415.85
E5RIW6;F5H8H8;Q5SVS4	Filtered	Filtered	Filtered
E5RJ26;P49810;P49810-3	Filtered	Filtered	14254.5
E5RJ52;P53677	79906.6	55901.8	75985.6
E5RJ68;O00203	197153	111423	179453
E5RJ99;Q8TCF1	100947	46001.4	35639
E5RJD8;O75347	1.71567e+06	1.2213e+06	805852
E5RJF8;E5RK82;O15182	51866.8	54136.7	52408.6
E5RJN7;E7EPX0;E7ER74;E7EVJ4;E9PEI3;E9PF26;E9PF50;E9PH62;F8VPI7;G5EA18;Q9NUL3;Q9NUL3-2;Q9NUL3-3;Q9NUL3-4	51024.4	38666.4	44077
E5RJR5;P63208	1.54031e+06	1.07758e+06	985787
E5RJS5;Q15390	19613.5	45134	46452.1
E7EM48;P33991	829515	789215	894086
E7EM60;P51398;P51398-2	167414	191949	256713
E7EM64;Q7L5N1	120258	76177.3	103028
E7EM77;H0Y861;H0Y870;Q5SSC2;Q9H0R3	Filtered	9984.64	14326.6
E7EM99	136796	39047.9	49351.3
E7EMB1;Q9UH65	490134	29900.2	29373
E7EMB3;E7ETZ0;H0Y7A7;P62158	3.40466e+06	1921115	1.48199e+06
E7EMC3;E9PBC1;E9PBC2;F6PQP6;O95208;O95208-2	47520.7	37771.3	44187.2
E7EMF1;E7ESP4	41177.5	62816.5	72787.2
E7EMN6;P41236	258751	201097	164041
E7EMP9;H0Y2N2;Q9NRR4;Q9NRR4-2	28785.5	15485.6	25700.2
E7EMR3;E7EN28;E7ENK1;E7ES20;E7ESV6;E7ETE3;E7EUP0;E7EUW2;E7EVD6;E7EW95;E7EX52;E9PBG4;E9PCJ6;E9PE04;H0Y9K5;Q9HAR2;Q9HAR2-2	24894.4	41497.5	47927.6
E7EMS2;G3V3D1;G3V3E8;P61916	93882.5	113908	105900
E7EMT1;E9PE96;Q9Y6V0;Q9Y6V0-2;Q9Y6V0-5;Q9Y6V0-6	58143.8	112078	68593.5
E7EMX7;E9PED3;Q9P0K7;Q9P0K7-2;Q9P0K7-3	79622.6	76974.4	104740
E7EN32;O00255;O00255-2	36393.5	47394.9	69747.8
E7EN46;Q8TB03;Q8TB03-3	60472.6	48297.6	59702.5
E7EN60;E7EPS3;Q9H2P9;Q9H2P9-2;Q9H2P9-3;Q9H2P9-4;Q9H2P9-5	101879	49434.6	46442.4
E7EN63;E9PBF2;Q9UBC3;Q9UBC3-2;Q9UBC3-3;Q9UBC3-6	80031.5	136803	182135
E7EN73;Q8IZA0;Q8IZA0-2	57269.3	73318.3	101277
E7EN96;E9PGW7;Q15528;Q15528-2;Q5T8T7;Q5T8T8	43807.1	56853.8	56995.3
E7END2;E9PHV5;P28290;P28290-2;P28290-3	10970.8	19200	72102.7
E7END7	39079.9	90886.8	88467.8
E7ENF1;F5H7W8;Q96C57	119896	120508	119001
E7ENH9;P53396	1.57453e+06	1.25241e+06	1.67893e+06
E7ENI0;F5H7K2;Q8IWI9	10795.5	34231.3	48068.8
E7ENN3;E7EQI5;E9PEL9;Q8NF91;Q8NF91-2;Q8NF91-4;Q8NF91-8	1.31462e+06	3.18673e+06	3.46936e+06
E7ENR5;H0Y714;Q96G21	159413	172139	303425
E7ENU4;P55265;P55265-4	261630	633496	705491
E7EP00;P53992	136716	109256	138826
E7EP23;E9PCX0;Q6IA86;Q6IA86-3	76581.6	51971.8	91236.1
E7EP65;E7EW77;Q9NYB9;Q9NYB9-2;Q9NYB9-4	144793	144049	149519
E7EP74	50956	62844	95100.3
E7EP77;E7EQX0;E7ESC9;H0YAG1;Q8IZU2	5761.64	12610	14811.8
E7EP97;H3BR29;H3BSM7;Q96GQ5	25542.9	41694	64465.3
E7EPA5;P10643	Filtered	26813.4	29680.3
E7EPA7;P29401	1220708	911376	982848
E7EPC6;P16070;P16070-10;P16070-11;P16070-12;P16070-13;P16070-14;P16070-16;P16070-17;P16070-18;P16070-3;P16070-4;P16070-5;P16070-6;P16070-7;P16070-8	358751	552197	686185
E7EPC9;E7EX17;P23588	539896	532446	525711
E7EPD1;P08572	73647.8	110749	138546
E7EPD8;G3V2F4;Q86TV8;Q9NUW8	76914	60649	77594.8
E7EPH0;F8W7B9;O60512	69040.3	60914.9	21403.5
E7EPI0;Q9P2D0	11232.4	8884.22	51714.1
E7EPK6;E7ETK0;P62847;P62847-2;P62847-3	1.90833e+06	1.46033e+06	1.21368e+06
E7EPL3;Q7Z401	34366.3	34133.5	52038.2
E7EPL4;H3BNZ1;Q6P996	156005	96765.4	131670
E7EPN9;Q9Y520;Q9Y520-4;Q9Y520-5;Q9Y520-7	222657	223207	251575
E7EPP7;Q6ZWJ1	25532.8	47843.3	80319.4
E7EPT4;P19404	245851	544190	561723
E7EPV7;P37840;P37840-2	71183.8	40831.2	52959.1
E7EPX7;E7EVP7;G5E9P1;Q14643;Q14643-2;Q14643-3;Q14643-4;Q14643-5;Q14643-6;Q14643-7;Q14643-8	49463.6	109611	165357
E7EPZ3;O60784	97743.3	76226.6	55203.3
E7EPZ8;H3BNF5;H3BPV6;H3BSB6;H3BUA4;H3BUR2	55611.5	48525.2	18470.9
E7EQ34;O14653;O14653-2	34827.8	41472.7	67854.6
E7EQ45;Q9H0R1	338686	Filtered	313246
E7EQ64;P07477	801870	110603	80706.4
E7EQ67;F8W8D6;H7BY63;Q8NB25;Q8NB25-2;Q8NB25-3	1.82391e+06	761198	1.14104e+06
E7EQ69;Q9GZZ1	204819	201184	161177
E7EQ81;F6UBB5;Q7Z412	Filtered	50924.4	Filtered
E7EQC1;P22570	271172	507492	599984
E7EQD5;F5GXG3;Q15833;Q15833-2	26275.1	29260.6	43077.9
E7EQJ0	30801.1	61947.9	81472.5
E7EQN6;Q9GZR1;Q9GZR1-2	29912.5	84279.6	84368.7
E7EQT4	410408	494829	629655
E7EQU1;E7ES08;O15347	949238	517848	475709
E7EQW9;E9PCR8;Q96RT1;Q96RT1-2;Q96RT1-3;Q96RT1-4;Q96RT1-5;Q96RT1-6	67631.5	121398	134968
E7EQY4;E7EV10;F8W8M8;Q9BTC8;Q9BTC8-2	56621.2	46319.3	49669
E7EQZ4;Q16637;Q16637-3	241605	244790	286958
E7ER53;E7EVZ1;G3V138;Q86UP3;Q86UP3-2;Q86UP3-4	1894.9	3585.23	14184.3
E7ER66;O94986	Filtered	46860.7	26050.6
E7ER89;H0Y373;O95340;O95340-2	32586	29023.5	37960.1
E7ER97;F5GXH4;O95671;O95671-2	35075.1	30575.1	31125.1
E7ERH6;Q9UBN7	67289.4	36686.6	61405.4
E7ERJ4;E7EWI9;P51991-2	1.91254e+06	4.28332e+06	2.00575e+06
E7ERK9;Q9UI10	174785	148197	211962
E7ERS3;Q86VM9	113260	97074.1	98918.1
E7ERU2;E9PEB9;F8W9J4;Q03001	19738.5	30471	15235.5
E7ERZ2;F8WDS5;F8WDV1;Q9Y535;Q9Y535-2	41463.2	26047.1	Filtered
E7ES19;P35443	Filtered	Filtered	Filtered
E7ES32	10372.9	Filtered	Filtered
E7ES43;O95757	264873	200539	238712
E7ES96;P49768;P49768-2	46627.2	36476	73893.2
E7ESA6;H0YBP1;Q05397;Q05397-5;Q8IYN9	52348	50151.7	43040.9
E7ESC0;H3BRP3;Q9UBI4;Q9UBI4-2	Filtered	Filtered	146589
E7ESC6;E9PEN8;Q9UIA9	120942	87917.5	104841
E7ESD5;E9PLN6;F2Z2Y1;O95677;O95677-2;O95677-4;O95677-5	9726.35	8636.36	16442.3
E7ESG3;Q96I15	207352	182283	187699
E7ESG6;F5H0B5;Q92504	17001.1	20268.6	23007.4
E7ESJ0;Q92743	Filtered	Filtered	Filtered
E7ESJ3;Q9UPS8;Q9UPS8-3	Filtered	11872.8	Filtered
E7ESK6;E9PBI9;F5H0S6;P34741	33060.4	10526.9	29987.8
E7ESL0;Q9NWU5	132399	101292	131175
E7ESM6;Q7KZF4	1.57227e+06	2.35544e+06	2.89977e+06
E7ESS3;Q71RG4;Q71RG4-2;Q71RG4-3	Filtered	Filtered	111554
E7EST0;F6YA60;H0YFM4;Q969R8	20210.7	24455.8	23402.8
E7ESU5;P02768	232759	486111	712316
E7ESZ5;Q9BV35;Q9BV35-2;Q9BV35-3;Q9BV35-4	Filtered	Filtered	Filtered
E7ET15	42324.9	49469.9	72768.5
E7ET21;Q9NVC6	96552.1	97827.7	144694
E7ET38;F8VQP3;O95628-4;O95628-8	31102.3	Filtered	21120.8
E7ET49;Q8NCG7;Q8NCG7-2;Q8NCG7-4	60235.2	73087.8	84910.2
E7ET55;F5H748;P35670;P35670-2;P35670-4	27060.7	23447.3	50497
E7ETA6	63495.7	67187.8	90822.6
E7ETB3;Q9ULA0	94524.3	44848	48991.3
E7ETE0	15263.8	19878.5	110067
E7ETP2;Q96GG9	83028.5	84010.7	95690.1
E7ETP9;Q9UQV4	Filtered	Filtered	Filtered
E7ETR5;H3BSM0;Q53FZ2	Filtered	Filtered	Filtered
E7ETS7;Q12959;Q12959-3;Q12959-5;Q12959-6;Q12959-7	58955.2	71080.6	71802.5
E7ETU7;H0Y9G6;P09001	168074	241332	358548
E7ETX0;Q8NHX9	59550	272879	35889.1
E7ETY2;Q13428-7	578067	869691	898183
E7ETY3;Q8IWA5;Q8IWA5-2;Q8IWA5-3	42632.8	Filtered	Filtered
E7ETY4;E9PC69;Q7KZI7;Q7KZI7-10;Q7KZI7-11;Q7KZI7-12;Q7KZI7-13;Q7KZI7-14;Q7KZI7-15;Q7KZI7-16;Q7KZI7-2;Q7KZI7-3;Q7KZI7-4;Q7KZI7-5;Q7KZI7-6;Q7KZI7-7;Q7KZI7-8;Q7KZI7-9	59857.3	43381.5	332022
E7ETY7;Q8TED1	55591.7	147470	189406
E7ETZ3;Q9BVC6	433111	607112	728277
E7ETZ4;Q9Y6E2	314382	311164	361920
E7EU09;P11362;P11362-14;P11362-19;P11362-2;P11362-20;P11362-21;P11362-3;P11362-4;P11362-5;P11362-6;P11362-7	11814.9	8183.07	20791.2
E7EU13;Q96P48;Q96P48-1;Q96P48-2;Q96P48-3;Q96P48-4;Q96P48-5;Q96P48-7	32013.5	26864.4	26870.6
E7EU23;P50395	1.32605e+06	1.13313e+06	1.39435e+06
E7EU28;Q86U06;Q86U06-2;Q86U06-3;Q86U06-4;Q86U06-5	17368.2	28283.9	34218.7
E7EU54	927436	68091.8	89467.4
E7EU78;Q9Y6K9;Q9Y6K9-2	70607.1	38947.9	43899.8
E7EU81	Filtered	Filtered	Filtered
E7EU96;P68400;Q5U5J2	570088	602794	729614
E7EUC3;O43657	37507.9	23824.2	30093.6
E7EUC7;Q16851;Q16851-2	148710	146793	136928
E7EUE1;P28288	321755	599796	842376
E7EUG5;H7C5V1;Q9BTF0;Q9BTF0-2	1959.75	789.751	2204.09
E7EUH9;H0Y6U5;Q86XI2;Q86XI2-2	125162	84705.1	72888.2
E7EUJ4;Q504U3	43334.4	44776.4	55148
E7EUL4;H7C3D5;Q8NC44	52326.9	28077	49515.9
E7EUN2;Q9UPQ3;Q9UPQ3-2	26986.7	39801.5	44680.2
E7EUN9;Q9NX74	71476.4	92551.2	92026.7
E7EUS2;Q8TBZ0;Q8TBZ0-2	Filtered	9209.79	9792.9
E7EUT4	14987599	10351364	10483774
E7EUU4	1.1435e+06	1.10234e+06	1.54526e+06
E7EUY8;Q8TBZ3;Q8TBZ3-2	Filtered	Filtered	46230
E7EV41;F5GZV3;F5H5B3;F6VPY9;P32418;P32418-2;P32418-3;P32418-4	1923.12	3733.75	5255.06
E7EV80;E7EX01;Q14168;Q14168-2;Q14168-3	52427.7	157272	221371
E7EVA0	853721	824666	956342
E7EVC7;Q676U5;Q676U5-2;Q676U5-3	36274.3	18023.5	9099.09
E7EVF4;E7EVJ5;Q96F07-2	41374.3	32120	30907.1
E7EVF6;Q9Y4P8;Q9Y4P8-2;Q9Y4P8-3;Q9Y4P8-4;Q9Y4P8-5;Q9Y4P8-6	70874.5	58223	62720.8
E7EVG1;Q8TAD8	161850	167335	136312
E7EVH7	144048	101850	103004
E7EVH9;E9PAV8;F5H6B0;Q08623;Q08623-3	100937	100391	92976.6
E7EVR7;H7BXU9;P21802;P21802-10;P21802-11;P21802-12;P21802-13;P21802-15;P21802-16;P21802-17;P21802-18;P21802-2;P21802-20;P21802-21;P21802-22;P21802-23;P21802-3;P21802-4;P21802-5;P21802-6;P21802-7;P21802-8;P21802-9	Filtered	10965.1	Filtered
E7EW05;Q9NVU7	61112.6	87295.9	112628
E7EW18;P06746	23124.4	29339.3	31726.1
E7EW20;Q9UM54-6	119030	81038	102479
E7EW67;Q6PII3	Filtered	Filtered	Filtered
E7EW84;E9PHI3;F2Z2Q3;Q8TAG9	45765.9	57293.8	79098.2
E7EW90;Q70EL1;Q70EL1-10;Q70EL1-7;Q70EL1-8;Q70EL1-9	Filtered	10286.7	8583.14
E7EW96;O14656	47744	79817.5	89300.6
E7EWC2;Q13576	39091.4	37817.5	43543.8
E7EWE9;Q8NBT2	106925	77420.5	82087.1
E7EWM1;Q15596	40680.6	32160.4	89196.2
E7EWN2;H0Y5J3;O15550	17138.8	32167	31203.5
E7EWQ8;O75093;O75093-2;Q5T0V0;Q5T0V2;Q5T0V3;Q5T0V4	Filtered	97628.1	142539
E7EWR0;Q13616	116776	84923.7	110089
E7EWT3	168264	89889.3	144908
E7EWW0;F5H7K1;G5E9I3;Q7Z3J2	29263.9	27802.9	28157.2
E7EWX6;E7EXB6;Q8IXJ6;Q8IXJ6-2;Q8IXJ6-3;Q8IXJ6-4	38721.9	33365.3	39122
E7EWZ6;P06756;P06756-2	47478.7	93114.3	109927
E7EWZ9;P60983	161269	287253	197319
E7EX51;Q96ST2;Q96ST2-2;Q96ST2-3	102696	106050	108408
E7EX90;E9PFS5;E9PGE1	74672.5	49612.7	73252.9
E9PAL6;Q86XN8;Q86XN8-2	2.2001e+06	2191450	2.68742e+06
E9PAL9	161190	311214	411992
E9PAM1;F5H0M7;H0YGN7;Q2M296;Q2M296-2	Filtered	Filtered	Filtered
E9PAT7;Q15013	7531.8	10809.8	14736.8
E9PAU2	236706	269619	293776
E9PAV3;F8VU71;F8VZJ2;H0YHX9;Q13765	1.53799e+06	1.16191e+06	970110
E9PAX8;F8W0Q9;Q8NEY8-2;Q8NEY8-8	155314	254032	257361
E9PAZ2;Q96HR8	81558	66965.6	93193.8
E9PB02;P78346	122254	155317	203308
E9PB12;Q96RT8	19398.5	17641.9	19655.7
E9PB30;Q4KMQ2;Q4KMQ2-2	57939	67152.7	85828.6
E9PB61	895699	1.73735e+06	1.81923e+06
E9PBB0;Q6Y7W6	215404	234319	237164
E9PBB3;P40855;P40855-5;Q5QNY5	127271	99325.4	88710.1
E9PBD4;H0Y368;O60762;Q5QPK2	253949	411835	609714
E9PBJ6;Q12772	171304	269000	65732.1
E9PBL7;Q14393;Q14393-2;Q14393-3;Q14393-4	Filtered	39225.1	63247.2
E9PBL8;Q8WTW3	25915.4	15438.8	17902.7
E9PBP2;P09668	21038.1	26301.9	19761.2
E9PBQ3;Q8N511	Filtered	77188.6	123931
E9PBQ9	773051	247317	121734
E9PBR4;Q96NL0;Q96NL0-2;Q96NL0-3;Q96NL0-4	Filtered	Filtered	Filtered
E9PBR6;Q5SNT2;Q5SNT2-2	113692	86843.9	257746
E9PBR7;H2N333;H3BT57;P29590;P29590-10;P29590-11;P29590-12;P29590-13;P29590-14;P29590-2;P29590-3;P29590-4;P29590-5;P29590-8;P29590-9	24730.5	37452.8	33926.8
E9PBS3;H0Y442;Q6ZS17;Q6ZS17-2;Q6ZS17-3	Filtered	Filtered	Filtered
E9PBV3	Filtered	3701.35	Filtered
E9PBV5;Q96FV2	60003.7	23942.8	31270.4
E9PBY3	7430.77	14973	19584.1
E9PBZ4;Q6P4H8	Filtered	Filtered	Filtered
E9PC49;Q96EB6	61886.2	38124.3	43137.3
E9PC62;O95319;O95319-2;O95319-3;O95319-4;O95319-5;Q5VZZ6	12211.4	36511	31148.6
E9PC67	Filtered	Filtered	Filtered
E9PC74;Q13144	150266	127097	165332
E9PC87;O94876	Filtered	3905.04	Filtered
E9PC97;Q8IWS0	479129	544395	550201
E9PCA6;Q9P2E7	Filtered	Filtered	9037.06
E9PCH4	16648.8	28298.4	30938.8
E9PCI3;P08243	868154	472890	635395
E9PCI9;P14324	496855	467543	508135
E9PCK7;Q5JTH9;Q5JTH9-2	302835	520967	804831
E9PCL5;E9PCV2;F5GXA2;F5GXV6;F5H7Z0;F8WA69;P56945;P56945-2	26988.5	Filtered	19891.9
E9PCM7;F5H2R1;F5H4I8;F5H838;F5H8J0;G3V1R3;P37275;Q2KJ05;Q5VZ84	17824	3739.7	31900
E9PCR4;Q9UJX5	60181	95264.8	120973
E9PCW1;O95249	33856.1	53759.9	53802.1
E9PD27;Q8TCZ2;Q8TCZ2-2;Q8TCZ2-3;Q8TCZ2-5	Filtered	63870.4	62557.6
E9PD44;H0YH69;Q9HBU6	49108	89208.6	119807
E9PD50;E9PEH2;Q92540;Q92540-2;Q92540-4	28834.8	30589.8	40547.4
E9PD64	156062	129722	160385
E9PD83;F5GZ53;Q13009	Filtered	Filtered	Filtered
E9PDB5;Q8N2G8	31024.8	62200.6	78403.3
E9PDC5;F8W846;F8W9T5;G8JL96;Q13332;Q13332-2;Q13332-3;Q13332-4;Q13332-6	15245	17052.6	15423.5
E9PDF6;O43795;O43795-2	108257	135531	188595
E9PDH4;Q9Y2I7	8187.66	12491.1	11936.1
E9PDM9;F5H170;Q8WW22;Q8WW22-2	112313	89566.2	88926.9
E9PDN5;F5GZT3;F5H6K1;H0YFQ3;P11532;P11532-4	117901	81372.2	105454
E9PDP9;Q8WV44	12128.5	14842.2	21327.2
E9PDR0;P05166	42147.4	89740.8	99079.6
E9PDV0;P32929	156209	98290.3	94743.7
E9PDW0;Q9ULJ7	Filtered	10860.5	20795.4
E9PDY5;Q96MM7;Q96MM7-2;Q96MM7-3	36084.7	21088.5	8049.67
E9PE68;Q9BZF1;Q9BZF1-2	204468	361469	456843
E9PE75;O43933;Q96S70	18329.1	15313.9	10876
E9PEC0;Q16186	296770	251785	254754
E9PEH8;F5H5C1;Q9Y4J8-2	44697.3	60819.3	95946
E9PEI0;Q69YH5	42465.4	50296.7	57915
E9PEJ6;P98196	28972	36255.7	66455.5
E9PEP6;O14786	33138.4	13052.5	27010.1
E9PER1;Q14689	34582.1	25813.2	53071.2
E9PES4;F5H1C2;Q9Y496	45812.3	38807.6	53688.5
E9PET8;O60282	421473	602128	778525
E9PEZ3;H9KV28;O60610	217619	122357	173882
E9PF17;P13611;P13611-2;P13611-3;P13611-4;P13611-5	35591.7	55927.6	61221.3
E9PF19;Q9Y4P3	168569	256117	387494
E9PF74;Q9HC21	55303.6	94095.4	140404
E9PFA8;H0Y5K5;H7BXI5;Q9Y282;Q9Y282-3	139237	171516	251214
E9PFA9;Q86Y07;Q86Y07-2;Q86Y07-3;Q86Y07-4;Q86Y07-5	43820.9	62492.4	76526.7
E9PFM7;Q8IXQ6;Q8IXQ6-2	Filtered	Filtered	Filtered
E9PFP2;O43719	106217	118501	103999
E9PFR0	41710.4	52617.6	15657.2
E9PFR3;Q14738;Q14738-2	232736	167687	221321
E9PFU1	654144	488551	570091
E9PFY5;F8W9I4	116341	76425.5	17617.1
E9PFZ1;Q5JPI3;Q5JPI3-2	6641.36	5947.47	9102.93
E9PFZ5;Q13308	91738.3	198953	216530
E9PFZ9;Q6SZW1;Q6SZW1-2	6790.65	7955.97	20714.7
E9PG19;O94868;O94868-2	12695.9	54065	8533.92
E9PG22;Q8IW35;Q8IW35-2	8437.1	29352.1	Filtered
E9PG71;P54764	734.789	15806.9	9952.05
E9PG73;Q13427	268738	451220	496749
E9PG89;Q12873;Q12873-2	19169.8	21412.4	19980.3
E9PGD0;F5GXJ4;H0Y860;H7C5A5;Q9P246	Filtered	7157.04	11429.4
E9PGG4	Filtered	Filtered	Filtered
E9PGI2;H0YKJ9;O60637;O60637-2;O60637-3	199351	250146	351572
E9PGL0;F5GXA0;F5GXF1;Q8NBK3;Q8NBK3-2;Q8NBK3-3	7501.29	13439.4	12044.3
E9PGM9;P78332	95851.7	244636	261439
E9PGP2;P03951;P03951-2	27613.3	Filtered	Filtered
E9PGQ0;Q96H78	Filtered	Filtered	Filtered
E9PGR1;Q9Y251	Filtered	14687.6	6627.82
E9PGT1;Q15631	80254.7	70189.8	64727.5
E9PGT3;E9PRI4;Q15418;Q15418-2	102070	60247.7	76973.7
E9PGT6;Q99627	236325	184785	194502
E9PGZ0;G5E9Q2;O75534;O75534-2	299271	326994	360235
E9PH08;H3BP77;O00142;O00142-2	Filtered	Filtered	20817.6
E9PH29;P30048	3297214	4936244	5.54286e+06
E9PH43;Q14376;Q5QPP4;Q5QPP9	33255	36817.2	30313.3
E9PHA2;Q15003	130002	86585.1	108597
E9PHH9;Q9BUI4	96318.6	185326	104733
E9PHI5;P51674	Filtered	5593.66	Filtered
E9PHK9;Q13428;Q13428-4	191109	270293	243414
E9PHQ3;F5GZL3;Q9HAU0;Q9HAU0-2;Q9HAU0-4;Q9HAU0-5	31900.8	43133.8	52009.5
E9PHR3;F5H1V8;G5E9I6;Q15555	47126.1	35305.5	46065.8
E9PHX2;H0YIY6	9927.86	10078.5	21303.2
E9PHX7;F5GYJ2;P52594;P52594-2;P52594-3	115134	103892	93166.9
E9PHY5	12612	19835	Filtered
E9PI08;E9PKA7;Q9Y256	23860.8	63433.5	88545.2
E9PI34;Q9UPV0;Q9UPV0-2	Filtered	18473.7	Filtered
E9PI87;Q9BUP3;Q9BUP3-3	18073.4	26620.2	39077.8
E9PI88;O60547	166951	193565	223358
E9PIC0;O14521	83805.1	44675.9	87408.8
E9PIE4	40391.3	87679	117935
E9PIK4;E9PIN5;E9PKN9;E9PKZ4;E9PMW4;E9PMY0;E9PN66;E9PNB3;E9PPM1;E9PQ46;E9PS55;O14683	26241.2	24140.9	39616.4
E9PIT3;P00734	11145.8	33987.8	8595.7
E9PJ24;F8WEF5;Q9P1Y6;Q9P1Y6-2;Q9P1Y6-3	51604.5	75619	96238.3
E9PJ42;E9PP29;Q5BJD5;Q5BJD5-2	49288.3	84329	45112.4
E9PJ64;F8WAP3;Q5VU43;Q5VU43-3;Q5VU43-4	67266.7	52240.2	42316.8
E9PJB8;E9PN30;Q6GYA4;Q9BQE4	13831.9	35189.4	53864.6
E9PJE5;E9PNH3;G3V151;Q17R31;Q17R31-2	29150.4	27114.4	20501.7
E9PK25;G3V1A4;P23528	10484629	7.13791e+06	5.40803e+06
E9PK59;E9PS17;Q96KG9;Q96KG9-2;Q96KG9-3;Q96KG9-4	155907	118534	169292
E9PK91;Q9NYF8-3	55810.9	55745.7	17157.7
E9PK95;F8VNP5;F8VZR5;P28702;Q5STQ1	101950	194153	199875
E9PKA8;E9PLE3;E9PQL5;E9PSC8;Q6ZUT1;Q6ZUT1-2;Q6ZUT1-3	9141.05	7627.2	8516.36
E9PKB9;Q92543	6701.42	23889.7	23962.3
E9PKD1	342117	711750	897465
E9PKE4;F5GXA8;Q9HAB3	Filtered	Filtered	45852.8
E9PKF6;G8JLI3;H7BXH2;Q5H9R7;Q5H9R7-2;Q5H9R7-4;Q5H9R7-5;Q5H9R7-6	97273.4	99191.2	120455
E9PKG1;G5E9B6;H7C2I1;Q99873;Q99873-2;Q99873-3	618376	310380	419465
E9PKP7;P17480-2	353623	610210	801783
E9PKS3;P17405	Filtered	22921.6	35009.8
E9PKT4;Q8N131;Q8N131-2	168760	258599	359287
E9PKU7	41230.1	23756.6	26109.3
E9PL01;Q15005	146944	254966	340975
E9PL17;Q92989	77671.5	96436.4	123711
E9PL22;F5H4Z5;Q9Y4L1	453125	710167	642127
E9PL47;F8W860;Q9UBF8;Q9UBF8-2;Q9UBF8-3	57797.1	42544.3	47122.7
E9PL71	82799.7	38367.1	26730.9
E9PL82;E9PMR4;P48509	115814	204709	341282
E9PLD3;E9PRG8	346291	358818	374480
E9PLE4;E9PS47;Q9BVG9	84266.5	148050	166552
E9PLI6;E9PQD0;E9PRR8;E9PS30;E9PS76;Q8N9N8	44337.3	25930.5	24084.3
E9PLJ2;Q5VUV5;Q9BZP6;Q9BZP6-2;Q9BZP6-3	Filtered	Filtered	Filtered
E9PLK3;P55786	537094	449353	520925
E9PLM6;E9PPJ5;P21741	20614.9	25060.3	33462.6
E9PLN8;F8W9H0;I3L3B4;Q9BQB6;Q9BQB6-2;Q9BQB6-3	257254	455485	584268
E9PLY5	112192	Filtered	Filtered
E9PM19;F5H7K8;P29597	5615.5	197398	222116
E9PM46;Q96K76	79057.1	65347.6	81988.4
E9PM92;O00193	368900	133999	62720.2
E9PM96;P18074;P18074-2	62320.4	98936.7	236662
E9PMA3;Q8IZM9;Q8IZM9-2	Filtered	Filtered	Filtered
E9PMI6;P54105	528031	228895	177336
E9PML2;Q96CM3	47355.5	36060.8	58471.2
E9PML7;E9PPM8;Q9Y315	54753.2	41676.8	45664.7
E9PMM3;Q9Y5Y5;Q9Y5Y5-2	16503.7	18746.1	22861.3
E9PMQ6;Q00613;Q00613-2	48567.4	37256.6	Filtered
E9PMR6;Q9NZN5;Q9NZN5-2	15246.6	8905.12	8717.9
E9PMU7	61454.1	43959.1	28057.4
E9PN10;E9PND3;O00559;Q5Y8C7	88402	194676	229661
E9PN11;P08134;Q5JR08	135943	148494	290616
E9PN47;G5EA34;Q8NDH3;Q8NDH3-2	24684.6	23953.5	34051.8
E9PN65;Q13444;Q13444-2;Q13444-3;Q13444-4;Q13444-5;Q13444-6;Q13444-7;Q13444-8	23758.3	25799.3	39446.5
E9PNK6	69322.7	105305	72596.7
E9PNP3;E9PR47;Q9H7C9	126380	103222	212394
E9PNW4;E9PR17;P13987	173948	246746	227798
E9PNW5	4.29662e+06	2.17301e+06	3.46e+06
E9PP15;Q14114;Q14114-2;Q14114-3;Q14114-4	7390.72	22582.1	17491.2
E9PP21;P21291	70416.6	40800.9	35929.9
E9PP28	Filtered	Filtered	Filtered
E9PPG8;Q53FT3	162693	109779	97292.8
E9PPN1;F2Z3M0;H0YCV5;Q8WW01;Q8WW01-2	85359.9	57743.8	56538.3
E9PPU0	184994	155793	282238
E9PPX7;F8W8H2;H0Y6L7;H3BQV1;Q0D2I5;Q0D2I5-4;Q0D2I5-5;Q0D2I5-7;Q5TF58	Filtered	Filtered	Filtered
E9PPZ9;O43292	98415.4	106197	156873
E9PQC4;Q9BZD4	Filtered	37127.9	52537.6
E9PQG7;Q03164;Q03164-2	37529.1	83588.7	114460
E9PQR4;P50607;P50607-2	Filtered	47307.6	Filtered
E9PQZ2;Q11206;Q11206-2;Q11206-3;Q11206-4;Q11206-5;Q8N6A6	Filtered	Filtered	9014.98
E9PR30;P62861	1.95716e+06	2.04842e+06	2.2793e+06
E9PR71;Q9P2Y5	14821.1	14028.7	22603.9
E9PRT4;Q4G0F5	113166	84663.1	91616.9
E9PRV2;F5H202;P46937;P46937-2;P46937-3	48536.3	54677.1	50959.5
E9PRW7	Filtered	Filtered	Filtered
E9PRY8;P29692-2	3.31645e+06	2.1516e+06	2.20539e+06
E9PSA5;Q96Q83	Filtered	51342	46702.9
E9PSI1	67218.8	63393.3	59360.2
F2Z2D5;Q8WVV4;Q8WVV4-1;Q8WVV4-3	Filtered	Filtered	Filtered
F2Z2E1;F5GY05;F5GZX9;Q96EK7;Q96EK7-2	57179.6	63100.6	75254.6
F2Z2E2;Q86VI3	17501.9	20570.1	22385.8
F2Z2T6;Q9HAH7;Q9HAH7-1	16600.2	69850.1	45762.3
F2Z2T8;F8VQY2;Q96RL1;Q96RL1-2;Q96RL1-3	29358.4	27940.4	27610.8
F2Z2U4;Q9Y4A5;Q9Y4A5-2	63677.2	110217	160800
F2Z2W7;Q8IZ69	102071	124930	149589
F2Z2X0;O00746;Q4TT34	390276	38272.3	361871
F2Z2X4;Q9C0E2	91772.4	122995	162716
F2Z317;Q9BYW2	15593	38531.9	53847.6
F2Z329;Q96Q45;Q96Q45-2;Q96Q45-3;Q96Q45-5	13086.6	24618.9	20435.2
F2Z384;Q96GJ1;Q96GJ1-2;Q96GJ1-3	101948	74411.3	102036
F5GWD1;Q9Y385	37252.9	40380.2	38814.9
F5GWD3;F5GWI8;F5GX35;F5GXG6;F5H4K7;F5H6X0;Q13889	65544.1	Filtered	Filtered
F5GWD7;Q8WVC0	163599	276359	263708
F5GWE0;Q15170;Q15170-2	22256.8	27619.9	26922.3
F5GWE5;Q00169	141647	79967	104705
F5GWF1;Q8TDJ6;Q8TDJ6-2	27961.2	29126.4	35901.1
F5GWG9	30572.7	Filtered	Filtered
F5GWH5;P61165	101968	208623	339779
F5GWI9;F5GXZ7;F5GZ97;Q9Y3C0	54920.6	56371.9	63132.4
F5GWJ1;O60245;O60245-2	17211.7	23980.4	30333.7
F5GWM1;Q14642;Q5T1B5	3260.65	Filtered	6247.11
F5GWM7	19278.4	24659.9	26328.7
F5GWP1;Q92575	145294	301911	452805
F5GWP3;H0YJ75;Q13362;Q13362-2;Q13362-3;Q13362-4	158114	116701	158146
F5GWR2	81493.5	117063	58463
F5GWR5;Q13642-1;Q13642-4;Q13642-5	167913	452521	380266
F5GWS3;Q6P9B6	69270.3	81751.2	96924.1
F5GWT4;F5H2M7;Q9H4A3;Q9H4A3-2;Q9H4A3-5;Q9H4A3-6	70468.9	52308.5	65252.2
F5GWU3;Q86YB7;Q86YB7-2	Filtered	Filtered	Filtered
F5GWU7;Q99717	194319	206961	285447
F5GWW1;Q8N283	247949	587077	291065
F5GWX3;P25445;P25445-6	25832.1	44753.8	45458.7
F5GWX5;F5H2G1;Q14839;Q14839-2	609966	705414	1.0016e+06
F5GWY5;F5H3W1;O00592;O00592-2	68984.9	74063.2	92636.1
F5GX09;Q5HYJ3	40289.3	101627	85555.2
F5GX28;O94953	20651.8	79487.8	117317
F5GX30;P78364	17750.6	12567.9	18481.1
F5GX42	28740.3	60039.4	108012
F5GX65;Q8N2F6-5	13562.1	22348.1	22194.1
F5GX74;G3V1U0;Q6VMQ6	114777	94826.6	90661.9
F5GX82;O94915	40604.1	37895.2	46000.2
F5GXC8;Q9P2R7;Q9P2R7-2	200927	393807	495568
F5GXD5;G3V180;G3V1D3;Q9NY33	236551	164670	134163
F5GXE2;Q9NZ09;Q9NZ09-2	35884.4	35580.2	30766.7
F5GXE9;Q9Y3X0	27510.2	47451.7	54064.1
F5GXG0;Q96T88	389752	532941	677754
F5GXI9;F5GZ86;F5H5X3;H0YJH6;P42226;P42226-2	41427.5	19192.1	19503.4
F5GXJ0;F8W0W3;I3L0B9;Q5ST30	25080.5	50986.8	70322.3
F5GXK1;P20585	388609	261352	167155
F5GXK8;P0DJ07	Filtered	Filtered	28382.8
F5GXL7;I3L4X2;P33527;P33527-9	43541.2	78347.8	109920
F5GXL8;P09110	127606	350976	392343
F5GXM6;Q5THR1;Q9H5Z1	1.98989e+06	925873	1.06765e+06
F5GXP4;F5GY14;H3BPJ2;Q15041	70224.7	133680	166658
F5GXU2;O60678	176317	152711	127071
F5GXW6;O95415	Filtered	Filtered	Filtered
F5GXX5;P61803	451711	191481	201554
F5GY30;P04156;P04156-2	34618.2	38149.9	38197.8
F5GY80;F5H7G1;P07358	Filtered	Filtered	Filtered
F5GYA4;O14519	58639.3	39134.6	53093.4
F5GYD8;P04062;P04062-2	139176	169784	208233
F5GYE6;P04035	Filtered	11432.1	21874.4
F5GYH6;Q9Y217;Q9Y217-2	37388.9	19477.8	23703.1
F5GYJ5;Q9NX18	17821.8	58380.5	53189.5
F5GYN4;Q96FW1	396444	241039	228544
F5GYQ1;P61421	156390	244943	343340
F5GYQ4;P00367	763947	1.4753e+06	1.49057e+06
F5GYQ5;Q5TBB1	141976	90244.2	100192
F5GYQ8	20390.7	27061.8	Filtered
F5GYX5;F5H445;O14513;O14513-2;O14513-3	216621	76352.6	18525.6
F5GYX8;F5H4W7;Q9NW81	39816.4	34044.4	42366.4
F5GZ02;Q96CP6;Q96CP6-2;Q96CP6-3	30136.3	47196.8	59292.8
F5GZ16;Q13200	802149	452707	561181
F5GZ28;P18858	151564	96941.1	126334
F5GZ51;Q8N5G0;Q8N5G0-2	73081.5	Filtered	27844.7
F5GZ78;F5H854;P49023;P49023-2;P49023-3;P49023-4	77865.3	78216.1	50145.7
F5GZ90;Q9NZJ0	41673.5	23913.1	37414.6
F5GZA2;F8WDA7;P39060;P39060-1;P39060-2	23840.3	37217.1	65901.9
F5GZB3;F8W891;H0YEW1;Q38SD2	415014	228163	305964
F5GZK1;Q9UBQ6	22492.7	40515.1	41148.4
F5GZL5;Q5VT94;Q9H3K2	91339.4	99611	103034
F5GZN0;Q7Z7A1;Q7Z7A1-2;Q7Z7A1-5	371.492	21265.1	15709
F5GZS0;Q9H2U1;Q9H2U1-2	127727	88141.9	133263
F5GZS6;P08195;P08195-3;P08195-4	437860	567832	613690
F5GZX4;Q9H9Y6	112149	178321	249897
F5GZZ6;F5H5T2;F8VWA9;F8VXJ0;Q5BKT4;Q5I7T1	308139	295988	351706
F5H025;F5H1H0;G3XAF4;P32004;P32004-2	19757.7	46967.1	44741.4
F5H039;F8W7D6;Q9NQX3;Q9NQX3-2	124739	120025	174652
F5H055;Q5T0B9	Filtered	Filtered	16500.2
F5H066;F5H0S9;Q9UP95;Q9UP95-2	115615	177045	245920
F5H070;F5H4E6;Q9Y4C1	36927.8	30273.7	55641.9
F5H098;P40925	2.50829e+06	2.11482e+06	2.22414e+06
F5H0C3;F5H219;F8W762;F8WCP6;Q7Z4S6;Q7Z4S6-2;Q7Z4S6-3;Q7Z4S6-4	26000.1	21148.9	47914.5
F5H0C4;Q9BRP4;Q9BRP4-2	121363	93044.6	104614
F5H0F5;Q8WU90	271687	202937	186717
F5H0F9;Q9UJX4	67009.7	57553.8	67550.5
F5H0G2;Q14849;Q14849-2	47929.4	39530	62695.4
F5H0H0	25882.6	Filtered	Filtered
F5H0H3;F5H1L1;Q15424	778977	1.0226e+06	1.22259e+06
F5H0J4;H0YGA7;H3BM05;Q9BY67	73684.4	88775	85674.8
F5H0J6	75461.7	32622.2	28362.3
F5H0K1;F8W9R9;O75448;O75448-2	39243.5	53942.4	79290.1
F5H0K8;F8WEA9	Filtered	Filtered	Filtered
F5H0L8;Q9Y6Y8	217909	151811	166143
F5H0N5;Q8ND04;Q8ND04-2	30300	26447.1	36763.6
F5H0Q5;P02765	20364.5	13238.2	8669.76
F5H0Q6;F8WAG9;Q8N2M8;Q8N2M8-3	10543.2	27480	61883.2
F5H0R0	37658.2	46971.3	55691.9
F5H0W0;H3BV55;O15305	62135.1	31171	37160.5
F5H0W2;Q8N428;Q8N428-2	Filtered	Filtered	Filtered
F5H0X5	187029	317100	388275
F5H0Z5;I3L172;Q9BUT9;Q9BUT9-2	Filtered	3895	Filtered
F5H1A8;F8WA45;P06396;P06396-2;P06396-3	53050.5	55875	50918.9
F5H1F7;P29375;P29375-2	14389.1	27559.7	38452.1
F5H1G4;F5H2X3;O60462;O60462-2;O60462-3;O60462-4;O60462-5	6924.84	40705.4	11303.8
F5H1L4;F5H2M2;F5H2V0	183624	390810	354895
F5H1L8;H7C0T2;Q6GPH6;Q6GPH6-2	16560.4	32217.6	38962.3
F5H1N7;F5H2I6;Q6ZU35	Filtered	13364.1	18810.7
F5H1R5;P31323	58654.4	66059.4	72018.6
F5H1U5;P42357	Filtered	Filtered	Filtered
F5H1W0	158267	55853.7	63023.6
F5H1X8	91018.3	69399.1	87599.5
F5H1Y4;Q9HD26;Q9HD26-2	85280	95041.1	104291
F5H213;O00308	Filtered	54086.6	2218.71
F5H293;H7BXQ6;Q6UXD5-3	15420	60676.3	10570.1
F5H2A9;G3V1M7;P49748	97200	168560	199131
F5H2J3;Q96GC9	122426	104669	116441
F5H2M5;Q13129	29870.6	38998.5	50868
F5H2Q4;P43378	Filtered	Filtered	Filtered
F5H2Q7;F5H2Y7;Q9C0E8;Q9C0E8-2	148951	307551	414749
F5H2S2;Q8TF71	16975.7	22779	43830.3
F5H2S7;Q13561;Q13561-2;Q13561-3	309315	179900	150635
F5H2T1;Q5VUJ6	48069.9	30512.6	34618.8
F5H2U2;Q13523	63065.7	186167	241637
F5H2Y9;F5H3R1;H0YMG7;O94788;O94788-2	72972.6	63456.5	81349.6
F5H315;Q9HCS7	152378	252440	391164
F5H364;F5H7Q6	Filtered	Filtered	Filtered
F5H365;Q15436	193294	171618	211973
F5H398;P78563;P78563-3	16331.5	42844.8	44526.4
F5H3A1;P05023	1.48513e+06	2585978	3.56537e+06
F5H3E4;O95551;O95551-2;O95551-3	52874.9	49680.3	100305
F5H3H6;Q9BQ39	183990	449635	613840
F5H3J3;O43529	6633.59	4837.8	8138.6
F5H3N4;Q16850	158651	228698	422114
F5H3P9;Q969M3;Q969M3-3	60835.5	49211.9	59509.7
F5H3X5;Q99996;Q99996-2;Q99996-3;Q99996-5;Q99996-6	42445.5	45736.3	51321.2
F5H3Y1;H0Y7P1;Q93074;Q93074-2;Q93074-3	45123.8	39651.3	54935.3
F5H442;Q99816	142200	96146.5	122335
F5H476;Q5VTE6	1.08744e+06	1.74245e+06	275369
F5H4C2;Q9H6Z4;Q9H6Z4-2;Q9H6Z4-3	199025	125622	137515
F5H4D0;Q2KHT3	380918	163214	65120.2
F5H4D7;G3V1L0;P78539;P78539-2;P78539-3	Filtered	Filtered	Filtered
F5H4E4;I3L2G3;Q9HA64	85693.1	58888.2	61982.4
F5H4F7;Q96JJ7	206771	292144	415411
F5H4G5;Q9UBV7	Filtered	Filtered	Filtered
F5H4I0;P09622	637939	1.45441e+06	1.57202e+06
F5H4K0;Q5T9L3-2	69975.9	89155.2	123595
F5H4L0;Q9BSJ2	163810	150174	188261
F5H4M2;P54198	18977.3	43529.7	67060.7
F5H4P2;Q6GQQ9	26121.3	16408.3	20821.2
F5H4R0;Q59FE7	Filtered	Filtered	Filtered
F5H4U5;P04899-4	113426	144398	203998
F5H4U9;F8WA05;H0YKH1;H0YLF5;P40424;P40424-2	100425	120231	128874
F5H4V4;P46013	137768	281465	421611
F5H4W8;Q969U7	135835	97213.9	95311.2
F5H4Z4;H0Y6I6;Q96ME1;Q96ME1-2;Q96ME1-4	57844.3	77855.2	69444
F5H538;Q9Y6R4;Q9Y6R4-2	30659.5	19823.8	24317
F5H569;Q93050;Q93050-1	115806	155202	228096
F5H5D3	1.31098e+06	793412	1.01207e+06
F5H5E4;P54687;P54687-4	176992	123874	128547
F5H5H1;Q8NCL4	Filtered	7413.47	Filtered
F5H5I8;G3XAH6;P51003	146126	123799	138290
F5H5K9;Q8IY17;Q8IY17-2;Q8IY17-3	21264.4	26025.2	52554.3
F5H5M2;Q06828	Filtered	Filtered	Filtered
F5H5M6;Q14520	Filtered	Filtered	Filtered
F5H5M7;P15260	25207.2	28395.4	52030.3
F5H5M9;F5H865;Q9UKE5;Q9UKE5-2;Q9UKE5-3;Q9UKE5-4;Q9UKE5-5;Q9UKE5-6;Q9UKE5-7;Q9UKE5-8	Filtered	Filtered	31624
F5H5N0;Q5VT25;Q5VT25-2;Q5VT25-4;Q5VT25-5;Q5VT25-6	56444.4	68965.7	82082.2
F5H5N4;F8VVB6;F8W1A2;Q99435;Q99435-2;Q99435-3;Q99435-4	Filtered	Filtered	14629.4
F5H5P2;P12694	92957.6	204433	190700
F5H5R8;P18440	26990.7	18237.3	12992.5
F5H5S2;F5H5X2;Q6NS38	10442.7	6534.1	Filtered
F5H5T5;Q7Z3V4;Q7Z3V4-2	Filtered	Filtered	Filtered
F5H5V5;Q01167;Q01167-2	78333.1	74564.5	90289.1
F5H604	164325	168627	227158
F5H620;Q96HP4	256346	94924.3	114631
F5H647;Q15572;Q15572-4;Q15572-5;Q15572-6	22682.3	37003.9	65260.1
F5H656;Q8WXF1	523451	917069	712150
F5H668	95928.9	35354.5	26192.6
F5H669;Q8N684;Q8N684-2;Q8N684-3	167282	374679	501322
F5H685;H7BYY3;Q5JWT2;Q9ULK4;Q9ULK4-2;Q9ULK4-3;Q9ULK4-4;Q9ULK4-5	68211.9	85892.5	119866
F5H6B8;Q12872	87874.1	305269	474167
F5H6D1;H0YH47;H7C0U7	190331	160736	212317
F5H6K0;O43143	1.19045e+06	2.2442e+06	3.0377e+06
F5H6L9;Q9NR20;Q9NR20-2	56454.5	42156.3	47806.4
F5H6R1;Q9Y388	44748.8	58173.5	65536.4
F5H6T3;O95873	20024.8	20707.1	24380.4
F5H6Z0;Q00537;Q00537-2	44884.4	63955.3	75200.4
F5H711;Q8N5M9	158093	95666.7	126941
F5H715;Q96BJ3	67991.6	125711	137998
F5H721;Q9Y2W2	156999	236506	239207
F5H7D3;O43567	36868.3	22020.1	21483
F5H7D6	139859	190909	210366
F5H7E9;O14802	117287	151579	192075
F5H7J9;O75581	Filtered	14920.8	16455
F5H7K4;Q6PIU2;Q6PIU2-2	Filtered	63911.1	91800.7
F5H7L1	268298	110229	119703
F5H7S4;O14757	97283.2	149130	185450
F5H7U7;O60507	Filtered	17537.5	25521
F5H816;P06737	367507	258772	342191
F5H843;O60669	11538.5	28688.7	34917
F5H872;Q13503	23506.2	24209.7	28220.8
F5H897;Q12931	1.16215e+06	2.92543e+06	4.00334e+06
F5H8F7;Q9UBL3;Q9UBL3-3	112877	141616	125671
F5H8I7;Q9Y5A9	236289	188623	170229
F5H8J3;O96005	111440	156257	265260
F5H8K4;O43242	300743	202160	258574
F5H8L2;Q6NTF9;Q9UDT1	50535	60107.5	51559.9
F5H8L9;Q5JRV4;Q92562	Filtered	Filtered	Filtered
F5HFY4;Q99733	535325	681938	328648
F5HGG6;P53634	152948	236004	193514
F6Q3Q2;F6SR56;F6TEP1;F6UCG7;F6UHJ8;F6V754;F6X9C6;F6XM29;F6Y981;H0Y4N7;H0Y4Q1;H0Y4V1;H0Y504;H0Y5A5;H0Y640;H0Y652;H0Y6F8;P20036	Filtered	Filtered	Filtered
F6S0T5;O60341;O60341-2	104966	136345	188193
F6TQG2;P28370;P28370-2	27449.3	33069.6	50327.5
F6VZ39;Q9H0Z9	73234.1	74302.6	90932.6
F6XS94;F8W7C5;Q08E86;Q14667;Q14667-2	Filtered	12341.3	22326.7
F6XY72	214586	263789	199465
F8VNW9;F8VSK3;F8VWH6;H0YI03;P40425	50031.7	80581.1	85785.6
F8VPD4;P27708	1.11738e+06	851507	1.32829e+06
F8VPF7;F8WCH5;Q96D96;Q96D96-3	Filtered	8125.97	15814
F8VPG7;Q13492;Q13492-2	47037	60081.6	73902.3
F8VQ10;Q13838;Q13838-2	6.40544e+06	8.14359e+06	9039613
F8VQD4;Q8TAD7	Filtered	16788.5	Filtered
F8VQD9;Q9BSB4	30745.6	Filtered	55344
F8VR31;P51530;P51530-2;P51530-3	22878.3	17575.6	25683.1
F8VRJ2	447970	Filtered	Filtered
F8VRQ1;F8VXY0;F8W6I7;P09651;P09651-2	9171269	9734477	7.68822e+06
F8VS64;P19013	Filtered	48574.9	51478.2
F8VS78;F8VWE0;Q12999	11979	16070.2	17801.2
F8VSL3;P25208	55681.4	44544.2	47381.1
F8VSZ4;Q9UIW2	50620.5	53684.1	73404.3
F8VU39;Q9UIF9;Q9UIF9-2;Q9UIF9-3	36217.1	66773.4	97871.2
F8VUJ3;Q8N4A0	Filtered	12462.1	30095.9
F8VUJ7	17776622	11640743	16449040
F8VV52;Q9NZN8	112789	112354	140558
F8VV69;F8W8P3;G3V1N7;Q6N075;Q6N075-2	Filtered	Filtered	Filtered
F8VVA7;P61923	430706	406508	495725
F8VVN7;F8VWX5;F8W098;F8W120;H0YIA4;Q9BVX2;Q9BVX2-2	Filtered	Filtered	Filtered
F8VW96;Q16527	38444.6	54218.5	45901.8
F8VW99;Q9H0K6	Filtered	Filtered	20891.4
F8VWT9	1704.02	1832.49	2537.01
F8VWZ8;Q52LW3	Filtered	4067.14	4846.24
F8VX04;Q9H2H9	41926.4	29111.1	69053.9
F8VXB4;P05787	882277	1.01978e+06	1621917
F8VXG7;Q99590;Q99590-2	64237	91945.4	101720
F8VXI9;Q14161;Q14161-3;Q14161-4	88148.4	85896.3	162054
F8VXZ4	1.00305e+06	707967	716331
F8VY86;Q12888;Q12888-2	101922	153530	190664
F8VYA6;Q9NRL3	64427.5	388892	714826
F8VYE8;F8W0W8;P36873;P36873-2	438317	412492	715056
F8VZX2	5.19535e+06	5723362	7.24735e+06
F8W1H5;P51148	190781	121001	144924
F8W1S1;Q7RTS7	Filtered	21383.5	18464.6
F8W1T6;Q15434	46653.3	42452.5	45406.6
F8W682;P04920;P04920-2	41178.3	51931.1	67900.7
F8W6M3;Q9NYG2;Q9NYG2-2	19916.3	22164	26525.6
F8W6N3;Q92560	655.286	29895.6	12602.6
F8W6N6;P10244	Filtered	19147.6	16468.3
F8W6V6;Q9H2D6;Q9H2D6-2;Q9H2D6-3;Q9H2D6-5	23751.1	16570.8	24973.7
F8W6X9;Q7Z5N4;Q7Z5N4-3	19667.1	46038	51444.5
F8W717;O00423;O00423-3	78749.5	39634.6	52692.1
F8W726	22422.2	28309.8	Filtered
F8W727;P62910	774374	545969	630399
F8W733;Q9NXR7;Q9NXR7-1;Q9NXR7-3;Q9NXR7-4	175425	165677	218527
F8W752;Q5R372;Q5R372-3;Q5R372-4	44914.7	37813.1	46336.4
F8W7K3	79756.3	69436.8	71624.8
F8W7M4;O14678	36988.8	40172.5	21825.9
F8W7P9;Q9H903;Q9H903-1	Filtered	Filtered	Filtered
F8W7Q4;Q96A26	432788	896694	960574
F8W7S1;Q8NAN2	Filtered	25264.8	31538.9
F8W7U2;Q02487;Q02487-2	17336.9	41966.4	42168.7
F8W7X5;H7BYT3;O75928;O75928-2;O75928-3	67969.4	60093.4	89827.5
F8W839;O60333;O60333-2;O60333-3;O60333-4	51235.4	31658.4	29601.1
F8W840;Q9BYJ9	136492	133540	157223
F8W842;Q6UUV7;Q6UUV7-3	9309.86	9077.47	9897.8
F8W892;H0Y3N5;Q5HYY5;Q96T21;Q96T21-2	172734	253969	259790
F8W8I6;H0YGW6;P31483	344047	751896	804675
F8W8K3;Q8N108;Q8N108-12;Q8N108-13;Q8N108-14;Q8N108-15;Q8N108-16;Q8N108-17;Q8N108-18	59397.1	37407.6	21318.3
F8W8Q7;H0Y6I0;Q13439;Q13439-3;Q13439-4	33160.1	52147.4	48308.9
F8W8W7;O43493-6	Filtered	Filtered	Filtered
F8W8Y9;G3V588;G3V5A3;H0YJE5;Q13572;Q13572-2	82327.2	40495.6	59538.1
F8W911;P38571;P38571-2	169543	164867	64663.2
F8W913;H7BY83;Q5JSH3;Q5JSH3-2;Q5JSH3-3	35851.8	26761.9	34785.5
F8W914	124995	98226.3	77885.3
F8W930;Q9Y6M1;Q9Y6M1-1	447554	523211	607714
F8W955;Q5JVF3;Q5JVF3-2;Q5JVF3-3;Q5JVF3-4	131250	82892.5	100676
F8W973;Q5SRE5;Q5SRE5-2	129441	168619	247256
F8W9B5;H9KV59;O43663	95437.7	93212.9	117427
F8W9C2;Q05086;Q05086-2;Q05086-3	64618.6	46538.4	56451.6
F8W9C9;Q8WVQ1	41329.2	43424.1	62651.9
F8W9D9;P46734;P46734-2;P46734-3	88984.5	63309.8	75279.7
F8W9H9;P08651;P08651-5	24205.8	56478.2	66095.6
F8W9I1	Filtered	Filtered	Filtered
F8W9I9;Q13627;Q13627-2;Q13627-3;Q13627-4;Q13627-5	35589.1	42063.1	57310.3
F8W9L4;P22607-4	23926	34073.7	28951.1
F8W9R3;P51797;P51797-5	190407	Filtered	Filtered
F8W9X7;Q567U6	36566.2	34865.5	46461.1
F8W9Y2;Q96T76	146637	102012	159777
F8WA39;Q13613	109046	117665	118394
F8WA59;P52655;P52655-2	3082.18	2264.66	1972.92
F8WAB8	31997.8	181835	39773.2
F8WAC3;Q9NWZ5;Q9NWZ5-4	63045	54689.3	85630.3
F8WAD8;G5E951;Q9P0K1;Q9P0K1-2;Q9P0K1-3;Q9P0K1-4;Q9P0K1-5	9643.23	6598.57	30761.3
F8WAF2;Q9H9A5;Q9H9A5-2;Q9H9A5-3;Q9H9A5-4	83872	72180	88077.8
F8WAI1	Filtered	Filtered	Filtered
F8WAJ0;Q9H8H2	336264	170626	175788
F8WAK8;Q8N3U4;Q8N3U4-2	127062	183893	215286
F8WAN7;H7C4X9;Q9ULU4-12;Q9ULU4-13;Q9ULU4-14;Q9ULU4-9	47998	98951	155283
F8WB05	14989.8	23737.4	Filtered
F8WBK2;O43493;O43493-2;O43493-3;O43493-5	12026.1	16128.1	25741.5
F8WBK5;Q9NQ50	111511	271417	304820
F8WBS1;Q9H832	81123.2	54552.8	66080.5
F8WBZ9;O75386	4911.44	11580.9	Filtered
F8WC15;P11166	118674	119501	275841
F8WC38;O75818;O75818-2	15777.8	15380.2	15137.8
F8WC68;O77932	34228.4	25904.9	35934.9
F8WCA0;P63027	221326	111836	176757
F8WCA3;Q8IX15	17721.9	24793.4	33464.9
F8WCD0;Q8NC42	9469.86	21386.7	28659.9
F8WCG1;O14657	Filtered	140096	204359
F8WCL7;Q9C086	Filtered	19003.5	22629.2
F8WCS9;Q70Z53;Q70Z53-2;Q70Z53-3;Q70Z53-4;Q70Z53-5	43050.7	43459.5	64921.8
F8WD04;G5E9T1;Q8WXF7	Filtered	Filtered	Filtered
F8WD63;Q70Z35;Q70Z35-2;Q70Z35-3	29528.4	46793.2	43500.7
F8WDL0	126558	105718	141336
F8WDM9;Q9NZM5	118340	140071	170163
F8WDY3;I3L0G8;P28715	39114.6	46174.6	41516.1
F8WE88;Q9Y4I1;Q9Y4I1-2	37571.8	25217.2	26809
F8WEC0;Q9H3L0	Filtered	Filtered	Filtered
F8WEC9;P02462;P02462-2	16386.7	27214.1	38521.4
F8WEQ4;P52735;P52735-2;P52735-3	308066	241178	313612
F8WF14;P06276	36252.3	30677.3	46174
F8WF48;Q99442	170068	413281	640983
F8WJN3;Q16630;Q16630-2;Q16630-3	328724	486142	527827
G3V0G5;Q8IV38	35693.2	32560.8	35381.5
G3V0I5;P49821;P49821-2	546880	1.03233e+06	1.37948e+06
G3V0I6;Q01804;Q01804-3	65831.5	72327.4	87663.7
G3V117;Q9NPA8	429960	520347	476320
G3V130;Q96E29;Q96E29-2	30270.8	53307.6	55822.9
G3V167;Q9UGN5;Q9UGN5-2	113312	125026	190912
G3V1C4;P30260	67438.8	72272.6	115376
G3V1J3;O75027;O75027-2	40066	64704.3	89165.6
G3V1K2;Q9Y2B1	Filtered	69416.5	Filtered
G3V1K3	175143	221306	325053
G3V1N1;O15226	95521.2	134214	130892
G3V1N2	151476	191126	298509
G3V1P3;Q969J3	48336.4	75713.9	79268.5
G3V1R9;G5E9U0;Q9NPH2;Q9NPH2-2	130809	79878.1	79620
G3V1S2;Q13617	187733	128547	192120
G3V1S4;G3V5S9;Q9Y324	151803	193580	232430
G3V1U1;Q8N118	14652.1	20345.3	18227.5
G3V1U8;P51948	71620.2	62993.1	46857.5
G3V1V0	1.59357e+06	1.14854e+06	1.08336e+06
G3V1V1;Q8TBF4	21955.5	21985.4	9484.55
G3V1X9;P45973	814133	1.10732e+06	1.41417e+06
G3V2F7	847337	741734	703369
G3V2T7;H0YFJ8;Q8WXE9	Filtered	Filtered	9298.95
G3V2U7;P07311	83503.6	47801.4	65973.7
G3V2Y4	Filtered	Filtered	49045.7
G3V325	61282.4	119877	157473
G3V3F1;Q8NHV4	66396.8	53320.8	56826.1
G3V436	75339.3	108435	Filtered
G3V4K3;Q9H9C1	23541.1	57996.6	65758.5
G3V4L5;Q9BQT8	36115.4	56158.4	89042.5
G3V529;Q9GZR7	43032	60046.7	78164.1
G3V533;Q6ZMZ3;Q6ZMZ3-2	7736.35	19295.4	28105.5
G3V583;Q8N128;Q8N128-2	37237.4	61092.9	60606
G3V599;G3XAC5;O15320;O15320-3;O15320-4	21901.9	65854.6	85775.2
G3V5J8;Q9NUM3;Q9NUM3-2	Filtered	Filtered	Filtered
G3V5L1;P61244;P61244-2	83147.2	135517	130118
G3V5P4;Q9Y281	226690	393951	305072
G3V5Q5;Q9BU02	38249.5	41308.4	Filtered
G3V5T0	66051.7	46610.1	46825.2
G3V5T9;P24941	578321	523033	692792
G3XA81;Q9BTX1;Q9BTX1-2	89906.5	163628	195102
G3XA93	21108.6	17461.4	29673
G3XAA0;Q8NFD5;Q8NFD5-2;Q8NFD5-3	100326	138458	172196
G3XAB3;Q96AE7	17601.4	31387.8	37349.2
G3XAB8;Q9HCJ0;Q9HCJ0-2	Filtered	Filtered	Filtered
G3XAE6;Q8IWU5;Q8IWU5-2	Filtered	2739.53	Filtered
G3XAG2;H0YNH8;Q9BZF9	2.33033e+06	3.65142e+06	563629
G3XAI2;P07942	54154.3	85665.5	83404.3
G3XAI9;Q5BKY9	74744.2	147885	100352
G3XAJ0;Q6JQN1	21218.9	45951.8	64070.7
G3XAN8;Q9Y5J9	635992	944883	975817
G3XAP3;H7BY43;Q9NUT2;Q9NUT2-2	68433.6	46600.4	51403.9
G3XCN9;Q86TS9	147844	126241	158675
G5E927	110232	314951	199457
G5E933;O95248;O95248-4	43596.6	43206.4	47290.7
G5E934	18482.2	64224.1	89838.3
G5E943;Q14542;Q14542-3	Filtered	13396.6	22493.6
G5E947	52905.8	110206	130679
G5E948;O95819;O95819-3	118777	166625	213521
G5E949;P51649	164031	308721	403120
G5E994	54181.2	48055.5	37105.8
G5E9A6;P51784	65169.1	46560.4	71659.8
G5E9B3;Q9BXB1	Filtered	696460	Filtered
G5E9D6;H0YJ86;Q9NS73;Q9NS73-2;Q9NS73-5	Filtered	Filtered	40216.3
G5E9E2;P29372;P29372-2;Q5J9I4	62127.8	87492.2	90587.1
G5E9E7;Q07157-2	175925	223794	293358
G5E9F3;Q9Y6J0	44999.7	80737.3	39743.2
G5E9F4;G5E9M7;G5E9M9;Q14135;Q14135-2;Q14135-4;Q14135-5;Q14135-6	14528.3	14912.4	18666.1
G5E9K7;O95251	58535.4	64596.6	81300
G5E9M5	1.07383e+06	1386982	1392423
G5E9M6;Q9NX61	26575.7	44311.6	30048.1
G5E9M8;P08047	64620.8	106182	106431
G5E9N1;Q86VX9;Q86VX9-2;Q86VX9-3	48047.5	42595.9	56749.1
G5E9U1;Q15642;Q15642-2;Q15642-3;Q15642-4	35318.3	26797.7	28993.5
G5E9V1;Q92734	717703	410269	473905
G5E9V5;G5E9W7;P82650	243301	505297	565374
G5E9W2;Q9P2E5	13421.8	25395.6	42037.9
G5E9Y2	298986	256386	281814
G5EA00;Q8WUR7	96949.2	105669	143958
G5EA09;O00560-2	226638	188480	232408
G5EA30;Q92879-4	432181	1127343	1.19409e+06
G5EA42;Q9NZR1	25181.9	28135.5	25723.1
G8JL95;Q9Y6X3;Q9Y6X3-2;Q9Y6X3-3	33530	27835.2	43324.4
G8JLB6;P31943	6.60178e+06	10072474	10102939
G8JLC9;Q63HQ2-2;Q63HQ2-4	Filtered	Filtered	Filtered
G8JLD3;G8JLM9;Q8IUD2;Q8IUD2-2;Q8IUD2-3	75184.2	53249.6	55510
G8JLD5;O00429-2;O00429-4	136141	80630.2	84386.7
G8JLE5;Q9BVW5	86139.7	66146	62944
G8JLG2;Q15517;Q2L6G8	Filtered	Filtered	Filtered
G8JLI1;Q4LE39;Q4LE39-2;Q4LE39-3	60400.2	73870.4	54495.6
G8JLI4;P02458;P02458-1	Filtered	Filtered	Filtered
G8JLI6;Q8IVL6	73892.2	106202	120511
G8JLJ6;H3BLT4;O15392;O15392-2;O15392-4;O15392-5	55696.3	80634.9	93540.2
G8JLK4;O75410;O75410-2	44161.9	63271.3	77262.5
G8JLL7;Q9H7P6	7646.1	8333.11	7783.62
H0Y2M7;H0Y599;Q8N1I0;Q8N1I0-3	10896.1	42005.4	35867.4
H0Y2P2;Q96IV0;Q96IV0-2;Q96IV0-3	103834	45701.2	62201.5
H0Y2P9;H7C0F2;Q8TBF5;Q8TBF5-2	Filtered	5917.6	6822.16
H0Y2T3;Q6IAN0	63799.2	129940	187308
H0Y2T7;Q9P2C4	74447.9	67212.8	115258
H0Y2Y8;Q15942	157696	96891	110162
H0Y2Z4	22771.2	17807.4	16775.7
H0Y327	121331	50298.3	103950
H0Y360;Q01433;Q01433-2	134390	129855	176153
H0Y3H2;Q99758	Filtered	Filtered	50842
H0Y3J5;Q9Y233;Q9Y233-2	Filtered	36176.1	Filtered
H0Y3R8	Filtered	28757.9	34583.6
H0Y3Y8;Q6NUK4	21816.7	29986.3	39786.9
H0Y449	238850	57517.4	39737.2
H0Y465;P21359;P21359-2	13716.2	8363.07	11583.9
H0Y477	186639	138277	115169
H0Y501;H7C1M5;Q9H147	6557.06	8828.97	8215.13
H0Y5H2;H7BY75;Q9BTV7	Filtered	Filtered	Filtered
H0Y5J5;Q7RTV5	Filtered	4908.88	25277.2
H0Y612;Q9UPN9;Q9UPN9-2	128078	93781.1	103059
H0Y645	Filtered	Filtered	Filtered
H0Y6C3;Q53H96	121694	95202.7	133665
H0Y6E6;Q92622;Q92622-3	7576.08	15408	19088.6
H0Y6K5;H0Y7L6;Q02447;Q02447-2;Q02447-3;Q02447-4;Q02447-5;Q02447-6	41267.2	77376.6	68776.6
H0Y7A5;Q9BX10;Q9BX10-2;Q9BX10-4	90398.1	75063.4	86649.1
H0Y886;O43674	169453	191007	214485
H0Y8A7;Q9NV92	Filtered	16948.6	25268.4
H0Y9R1;Q8IYR6;Q8IYR6-2	Filtered	Filtered	Filtered
H0Y9X1;Q96EY4	121595	177696	158531
H0YA52;Q9H0N5	87314.3	48911.2	63293.8
H0YAR1;Q9Y4K0	Filtered	Filtered	Filtered
H0YAV1;Q7LG56	14026.1	11989.3	9626.45
H0YAZ3;O60504;O60504-2	151504	97013.1	149940
H0YB13;O76061	Filtered	7448.94	5667.81
H0YCK3;P55265-2	101566	168137	245799
H0YD93;Q8WXA3;Q8WXA3-2;Q8WXA3-3	43899.8	37873.3	45620.8
H0YDM2;I3L0I1;O94964;O94964-2	44498.3	37431.5	48620
H0YDQ8;Q53ET0;Q5T4K5	33117.4	21253.7	24986.3
H0YDU8;P53041	270414	218657	219968
H0YE28;Q8IZQ5	38117.8	35999.1	28670.3
H0YE66	62978.7	57001.1	41194.9
H0YE88;P28347	109807	157409	164026
H0YEB6;O60232	315500	177656	199660
H0YEF7	65566.2	91486.8	102152
H0YEL0;O14893;O14893-2;O14893-3	152307	109382	114830
H0YG33;P08107	16893654	17674636	20305210
H0YG49;Q01130	3.24427e+06	3847004	3.08816e+06
H0YGC0;P52756	99431.6	155648	187406
H0YGH4;P01023	Filtered	Filtered	Filtered
H0YGP4;P31327	87538.7	168470	195207
H0YGR4;Q9Y3B8	250684	306137	240087
H0YH46;Q9NVR0	27737.6	Filtered	55033.3
H0YH67;Q8N8S7-2	374676	361617	325662
H0YH94;Q9NPR9	19336.6	27781.9	31642.1
H0YHD9	135685	237956	329307
H0YHF1;Q96MF6;Q96MF6-2	Filtered	Filtered	Filtered
H0YI09;Q9H8H3	299633	441777	639752
H0YI46;Q14D22;Q9BY43	54265.2	Filtered	31366.9
H0YIE9;O94952;O94952-1;Q4G104;Q8IUQ5	13971.8	Filtered	12731.8
H0YIV9	100026	154868	130051
H0YK61;H0YNK0;H0YNK8;Q5J8M3;Q5J8M3-2;Q5J8M3-3	106626	158831	245320
H0YK72;H0YK83;H0YNG3;P67812	129044	103289	156468
H0YKN5;Q9GZN2	Filtered	Filtered	48117.3
H0YLB5;P14859;P14859-2;P14859-3;P14859-4;P14859-5	138042	144774	143749
H0YLH3;Q92696	48659.3	54581.3	59346
H0YLN8;Q96QT4	Filtered	Filtered	Filtered
H0YLU8;H0YMD1;P01130;P01130-3;P01130-4	28708.6	27078.3	37486.4
H0YLV5;H0YMB3;H0YNJ6;Q6PKC0;Q86T14;Q9P2T1;Q9P2T1-2	27696.1	13202.8	12774.4
H0YLW2	Filtered	69949.8	97954.1
H0YLY9;Q14442	Filtered	39038.4	62599.4
H0YMV8;Q71UM5	1.72498e+06	1.48018e+06	2.0963e+06
H0YN65;Q8NCH0	102538	28552.1	92000.4
H0YNH6;Q9Y3B6	62870.7	112581	181000
H0YNP1;O94923	1.75144e+06	683826	864290
H3BLU6;Q63HN8;Q63HN8-4	2394.14	Filtered	2093.49
H3BLV9;Q96SB4;Q96SB4-3	184432	225513	314851
H3BLW6;Q5T3F8	4428.43	5567.43	26625.4
H3BLZ8;Q92841	5030282	7.05775e+06	8.23024e+06
H3BM14;H3BM74;Q9Y5A7;Q9Y5A7-2	41792.1	30904.4	41793.6
H3BM82;Q6FIF0;Q6FIF0-2	5653.85	6993.94	6047.12
H3BMF4	68053.8	144575	285473
H3BMJ2;Q6ZRI6;Q6ZRI6-2	50905.6	Filtered	Filtered
H3BMM9;H3BTC0;H3BV80;Q15287	1.74852e+06	1.67058e+06	2486137
H3BMQ0;P49815;P49815-2;P49815-3;P49815-4;P49815-5;P49815-6	34265.7	13927.1	18462.3
H3BMQ5	190079	135802	201392
H3BMU1;H3BUI0;P53990;P53990-2;P53990-3;P53990-4	81567.6	71435.2	95401.6
H3BMX2;H3BQY8;H3BUT6;Q9NTJ4	87492.7	54591.2	40731.9
H3BN51;H3BQA4;H3BR94;H3BS05;H3BUD2;Q9BTE1	26336.8	26291.7	15541.9
H3BN55;H3BS49;H3BU81;H3BUD9;H3BVH7;P51159;P51159-2	Filtered	Filtered	Filtered
H3BNP9;Q9Y6N5	Filtered	Filtered	Filtered
H3BNQ7;H3BRN4;P80404	Filtered	Filtered	Filtered
H3BNR7;H3BS25;Q9BY12	Filtered	Filtered	69194.7
H3BNT4;H3BSB3;Q99547	144815	207315	164848
H3BNU3	Filtered	30304	28739.4
H3BNY3	767098	824489	1.06541e+06
H3BP13;H3BUK6;Q9UL33;Q9UL33-2	32803.6	Filtered	14172
H3BP28;Q99807	16154.5	65496	79843.1
H3BP91;P42126	256645	444700	509854
H3BPE1;H3BQK9	113910	154799	179080
H3BPG9;Q58EX7;Q58EX7-2	Filtered	13465.4	Filtered
H3BPX2;Q5VST9;Q5VST9-2;Q5VST9-3;Q5VST9-5;Q5VST9-6	32918.4	53071.5	64734.4
H3BQB8;H3BUX2;O43169	66639	105569	54192.4
H3BQH3;Q8TBB5;Q8TBB5-2;Q8TBB5-3	29468.9	22651.7	32819.9
H3BR50;P27449	123891	Filtered	Filtered
H3BRB6;Q8ND25;Q8ND25-2	Filtered	21717.7	Filtered
H3BRL3;O14562	263557	219766	180275
H3BRQ0;Q96CD2;Q96CD2-2	13845.2	19407.4	19772.3
H3BRY3;P31146	294845	297406	291597
H3BS42;Q9H5H4	131476	135646	240642
H3BS47;H3BV03;Q68CZ1;Q68CZ1-2	54043.1	Filtered	Filtered
H3BSH7;Q969X6	99773.1	142686	238542
H3BSM5;P60520	173337	116635	103980
H3BST1;Q9UL45	1360.45	1169.82	1252.43
H3BT11;Q9NVU0;Q9NVU0-2;Q9NVU0-3	61716.4	51123.8	66734.6
H3BTN6;Q9H6L2;Q9H6L2-2;Q9H6L2-3	Filtered	Filtered	Filtered
H3BUA6;Q8N543	49499.5	36934	28243.2
H3BUV4;Q9NWW5	86278.4	170241	151101
H3BUV9;Q96S82	36376.3	25540.3	21369.9
H3BV00;Q6EEV4;Q6EEV4-2	107912	86921.1	67213.4
H6UMI1;O95166	465671	478951	45840.8
H7BXC6;Q96RQ1	51904.9	64919.1	88234.8
H7BXD5;H7C2Z6;P28676	67312.5	42150.2	35155.1
H7BXF4;Q9NXE4-2	76066.8	106161	152278
H7BXF5;Q9H0E3;Q9H0E3-3	57916.6	95308.1	100552
H7BXW3;Q9UNF1;Q9UNF1-2	260296	120165	139896
H7BXY8;O75882;O75882-2;O75882-3	16505.1	18082.5	32636.6
H7BXZ6;Q8IXI2-5	95768.2	196661	264494
H7BY36	31938	64150.1	66012.4
H7BY58;P22061-2	1.60811e+06	1.819e+06	1.64699e+06
H7BY99;Q8IZ21;Q8IZ21-2;Q8IZ21-3	93242.1	31778	56885.8
H7BYB2;Q5T8D3	66438	114269	148833
H7BYG3	2.50464e+06	3.82783e+06	7754120
H7BYJ1;Q969K3;Q969K3-2	19224.8	12564.8	15421.1
H7BYJ8;P48960;P48960-2;P48960-3	38002.6	55390.4	56674.1
H7BYM7;Q86XZ4	18860.6	19424.2	20989.8
H7BYP5;Q5VUB5	17714.7	34145.1	40637.2
H7BYW0	106087	64746.3	90989.2
H7BYY1	72340.2	69672.3	51974.1
H7BZ14;Q9H2H8	92008.7	117327	99429.6
H7BZ59;Q969E2;Q969E2-2	86124.6	244963	172327
H7BZJ3	4144161	4944130	3.55186e+06
H7BZK6;P62068;P62068-2;P62068-3;P62068-4	16778.9	13813.7	18806.1
H7BZR0;P18887	319863	562271	570932
H7BZT4;P61956;P61956-2	60179.7	67253.8	25568.6
H7BZY3;H7C4B9;Q9P1T7;Q9P1T7-1	3888.14	11120.6	15723.8
H7BZY9;Q8WTS1	Filtered	5655.32	10620.3
H7C0B3;H7C1G1;Q96K49;Q96K49-2	Filtered	6187.3	13356.6
H7C0S8;O75575	33801.9	23227.5	30985.1
H7C1J4;Q6BDS2	369238	360555	592976
H7C1N3;O15155	61471.9	61443.9	51886.6
H7C1U3;Q5T0F9-2	65642.4	384108	48041.1
H7C1U8;Q9BUR5	217438	382826	437580
H7C285;O95858	9145.71	19973.4	16042.2
H7C2Q8;Q99848	519147	911162	1.05578e+06
H7C2V5	43088.7	26770.3	35198.5
H7C3B3;H7C4C1;Q9NVV0	41461.4	34550.5	44558.7
H7C3D8;Q7Z7K0	52431.3	102320	79222.6
H7C3K3;Q15057	28247.6	Filtered	28709.2
H7C3R6;Q8IWT0;Q8IWT0-2	52365.4	69428.5	55441.8
H7C4C9;Q3B820;Q3B820-2;Q3B820-3	10802.2	Filtered	Filtered
H7C4P8;Q6ZU65;Q6ZU65-2	54878.3	141926	107804
H7C4T5;Q9NR56-2;Q9NR56-3;Q9NR56-4;Q9NR56-5;Q9NR56-6	208848	371450	367601
H7C4Z8;Q6P1Q9;Q6P1Q9-2	107273	59318.1	99725.9
H7C561	50564.9	78018.7	95391.8
H7C5B8;O95178	29628	108403	72511.6
H7C5E8;P02787	Filtered	Filtered	Filtered
H7C5I4	77147.9	49921.3	71775.5
H9KV30;Q8N9B5;Q8N9B5-2	11551.7	22377.7	10740.1
H9KV44;Q14156;Q14156-2	33372.9	55108.6	71826.6
H9KV46;Q86Y91;Q86Y91-2;Q86Y91-3;Q86Y91-4	44353.1	83626.2	120621
H9KV86;Q96JP5;Q96JP5-2	84976.6	66642.9	68504.8
H9KVA9;P46736;P46736-2;P46736-3	104669	83425.9	110364
I3L072;Q9BSJ5-2	15647.5	44044.6	58714.7
I3L085;Q8TCC3;Q8TCC3-2	29849.2	45409.9	39422.4
I3L097;Q6ZSR9	48496.3	38345.7	45548.6
I3L0A4;Q9NQA3	31307.5	26946.2	31925.6
I3L0C1;Q96Q15;Q96Q15-2;Q96Q15-3	41510.9	33520.7	48427.5
I3L0D3;P00738;Q0VAC5	Filtered	Filtered	Filtered
I3L0E3	305876	322339	422521
I3L0K7	52082.7	26798.9	Filtered
I3L0L6;Q9H6Y7	30257.9	39129.2	37702.5
I3L0N3;P46459	309345	349235	536210
I3L0U5;Q6PK04	66990.8	133030	133993
I3L0X5;O75391	56075.1	43659.4	39262.5
I3L100;I3L2W2;Q96JN8;Q96JN8-2	42809.9	35177.3	44826.1
I3L112;P52429	24929.3	82036.9	93819.8
I3L124;I3L1H1;I3L266;I3L3K8;Q86WA9	Filtered	Filtered	Filtered
I3L1Q2;Q8WUZ0;Q8WUZ0-2	113120	132299	183591
I3L1Y9;Q96CP2	105263	73633.3	66743
I3L291;Q16625;Q16625-3;Q16625-4	45851.7	107319	133902
I3L2B0	198190	139863	219375
I3L2C7;P57678	73547.2	45592.5	36054.5
I3L2H2;Q15697;Q15697-2	6004.98	13015.3	11708.7
I3L2J8;Q9UPN4;Q9UPN4-2;Q9UPN4-3	33132.7	17147.5	35028.2
I3L2N2;O14641	166564	123164	144713
I3L2Q6;I3L3Q1;Q6ZSZ5;Q6ZSZ5-2;Q6ZSZ5-3	Filtered	Filtered	Filtered
I3L2R9;Q9NXR1;Q9NXR1-2	41937.1	35934.1	36414.9
I3L383;I3L3R1;P17481;P31273	Filtered	42867.3	35599.4
I3L397;I3L504;P63241;P63241-2	4747620	3.58176e+06	1606546
I3L3A8;Q8IZL8	229545	408151	549383
I3L416	157123	216677	275045
I3L448;Q5TC12	87564.4	175162	160884
I3L4C2;Q9UQB8;Q9UQB8-2;Q9UQB8-3;Q9UQB8-4;Q9UQB8-5;Q9UQB8-6	33514	42114.5	57365.6
I3L4I4;O75674;Q8N749	27061.2	19442.5	19101.2
I3NI00;P35613;P35613-2	1.69453e+06	2964916	3.69452e+06
O00116	294203	595304	853024
O00124;O00124-3	8824.67	14051.3	22801.4
O00139-2	159503	145660	206452
O00148	546922	395589	472272
O00151	82728.8	66623.8	62890.4
O00154;O00154-4;O00154-6	537100	458809	483219
O00159-2	56368.3	69690.3	81598.8
O00161	226762	238241	222726
O00165	128605	297789	376348
O00170	309355	302227	266974
O00178	301251	259281	347969
O00186	266309	478074	627271
O00217	449050	998031	1.03418e+06
O00231	436482	311393	427563
O00232	607180	366547	437087
O00233	149363	114659	261345
O00257	42650.3	61754.9	69219
O00264	1.32646e+06	2.84531e+06	3922656
O00267;O00267-2	134409	106186	79105.7
O00268;Q5TBP5	32610.5	54170.6	64815.4
O00273	200092	147411	126494
O00287	Filtered	33560.4	35398.4
O00291	31710.2	68089.4	70632
O00299	1.15655e+06	1.0455e+06	1.01692e+06
O00311	19264.6	21126.7	31637.9
O00330	237291	427763	497498
O00399	50862.3	51059	33916.5
O00400	23170.9	46946.1	72524.7
O00401	95391.5	75025	85067.5
O00410;O00410-3	1.01259e+06	666003	972513
O00411	49836.2	116049	121161
O00418	56106.8	40109.4	48877.2
O00422	227778	196291	215039
O00425	405735	498169	568063
O00442	147593	155127	190638
O00443	43108.4	35765	46134.6
O00461	52005.1	75610.7	75950.4
O00462	5089.91	16914.7	27891.8
O00468	18195.9	26689.8	40921.5
O00469-2	260786	351293	367991
O00471	64024.9	34126.4	67456.4
O00479	26904	43426.4	20885.2
O00483	1214265	1.29127e+06	2.03277e+06
O00487	563005	358797	431178
O00488	95061.9	104739	155252
O00505	383655	321529	397005
O00512	24742.8	51868.1	60077.1
O00548	Filtered	Filtered	Filtered
O00560	326447	61768.2	108834
O00566	205641	315080	449154
O00567	381168	569396	955499
O00571	1.35766e+06	1.39632e+06	1.79413e+06
O00623	Filtered	2.08087e+06	628319
O00625	34956.6	Filtered	35971.7
O00629	183965	112087	146103
O00743;O00743-2;O00743-3	102398	65414.5	88083.8
O00762	153829	85978.3	100748
O00764	342309	316869	288472
O00767	144616	109957	151898
O14494	Filtered	Filtered	Filtered
O14495	Filtered	Filtered	Filtered
[truncated: 4,968 more rows]

## Sheet: OEP
Abundances - OEP (Organelle enriched pellet)
PG.ProteinAccessions	Replicate 1	Replicate 2	Replicate 3
A0AVT1	40515.4	72637.3	85648.5
A0FGR8-2;H7BXI1	335125	318200	428807
A0JLT2;A0JLT2-2	63733.6	Filtered	Filtered
A0JNW5	10173.4	Filtered	31642
A0MZ66;A0MZ66-2;A0MZ66-3;A0MZ66-4;A0MZ66-5;A0MZ66-6;B7Z7Z9	Filtered	99380.4	15167.8
A0PJW6	140973	102681	130078
A0PJZ3	Filtered	Filtered	Filtered
A0T4C8;E7ETB1;E9PCV4;Q9NRA0;Q9NRA0-2	Filtered	29506.6	40243
A1KXE4;A1KXE4-2;E7EVB9	25387	26384.2	34688.2
A1L020	60814.4	57772	59094.6
A1L0T0	193105	173405	270610
A1L170;A1L170-2;F8W6W0	Filtered	Filtered	Filtered
A1L188	61861.5	45858.3	45645.9
A1L443;D3YTH6;E2QRH1;F2Z373;Q5VZR2	Filtered	11294.6	Filtered
A1XBS5;A1XBS5-2;A1XBS5-3;A1XBS5-4;E5RGD0;F5H8I5;F8W7P5;G8JLC7;G8JLK8;H0YC32	48286.2	47358.4	37189.2
A2A2E9;Q86X10;Q86X10-3	20851.6	22175.2	25017.8
A2A2G4;Q9Y672	Filtered	Filtered	36753.7
A2A2L5;A8MSH5;Q9BY42	11977.7	10527.1	9762.45
A2A2Q9;Q9Y312	54946.2	57400.3	66986.9
A2A3N8;E7ENY0;E7EV99;P35611;P35611-2;P35611-3	200224	225076	142287
A2AAT3;B0S7V1;E9PD01;F6QTR8;F6REG0;F6RG32;F6SGB5;F6U8F7;F6UB75;F6UBK4;F6UKM5;F8VZ50;P28068	Filtered	Filtered	Filtered
A2AB90;A2ABB9;A8MUD0;D3YTI9;G5E9H8;O15533;O15533-2;O15533-3	11904.7	12762.5	57339.2
A2ABE9;A3KGM4;A3KGM5;A3KGM6;A3KGM7;B0UXD5;B0UXD6;B0UXD7;E7ENS8;H7C2J4;H7C5D6;O43196;O43196-2;O43196-3;O43196-4;Q5SSQ8;Q5SSR2	66471.6	57958.9	39796.8
A2ABF8;A2ABF9;B0UZY0;B0UZY1;B0UZY3;H0YHA9;H0YIM0;Q96KQ7;Q96KQ7-2	33627.5	38156.6	Filtered
A2AEA2;A2AEA4;F5GXA6;P10321	122067	111263	140334
A2BEU2;F5H135;P04440	41278.4	50743.4	71317.6
A2RRP1	660286	750520	451638
A2RTX5;A2RTX5-2	35933.1	41337	60813.6
A2RU67	41074.2	40566.7	71202.1
A2VCQ3;Q01973	87802.5	58925.4	92690.8
A3KFJ0;O14965	Filtered	24271.3	Filtered
A3KFL4	136437	119271	217779
A3KMH1;A3KMH1-3	84262.5	64802	79954
A3KMH1-2	Filtered	Filtered	18739.3
A3KN83;A3KN83-2;A3KN83-3	Filtered	Filtered	25706.1
A4D104	Filtered	Filtered	Filtered
A4D1D5;P21439;P21439-2	Filtered	Filtered	Filtered
A4D1E9	168652	169261	184043
A4D1P6	413277	373137	351545
A4D1S0;A4D1S0-2	15446.2	19926.9	13955.1
A4D1U4	100569	34111.2	43914.8
A4D1W8;Q9UM22	105414	87160.7	106089
A4D212;Q8N201	43400.6	28103.6	Filtered
A4D2Q0;E9PHI4	20245.2	16476.6	24468.6
A4D7V1;B8ZZU6;E9PBF9;E9PEK8;F5H629;G8JLM5;H7C2N6;P15336;Q8TAR1	Filtered	4341.57	Filtered
A4PB68;B0QZ55;H7BY62;Q3T8J9;Q3T8J9-2;Q3T8J9-3;Q9H869-2;Q9H869-3;Q9H869-5	Filtered	Filtered	Filtered
A5D8V6;F5H3K0;F5H4Q5	55860.1	43549.4	63971.7
A5PLL7;Q5TGE1;Q5TGE2	Filtered	Filtered	Filtered
A5PLN9;A5PLN9-2;A5PLN9-4;A5PLN9-5;A5PLN9-7;F5GXC3	75733.1	35866.8	57688.5
A5YKK6	99417.8	113852	74023.2
A6H8M8;B0UZ83;B0V2C8;F8VSI2;F8VW91;F8VZD8;P0C0L4;P0C0L5;Q5JNX2	85406.8	12914.9	135360
A6H8Z7;Q6UWP7	197329	181425	294484
A6NCB2;A6NMG4;Q9BX74	5936.23	Filtered	8972.59
A6NCD9;A6NKJ2;F8W8M4;F8WAB0;F8WAB1;H0Y3K7;O14639;O14639-2;O14639-3;O14639-4;O14639-5;Q5JVV3;Q5T6N2;Q5T6N4	39787.2	43408.7	15620
A6NCE7;H3BTL1;Q9GZQ8	93115	81155.5	98067.9
A6NCI0;Q9Y6G3	248568	88763.3	71928.8
A6NCN2	Filtered	Filtered	Filtered
A6NCZ0;C9JFX6;Q9BUJ0	Filtered	Filtered	Filtered
A6NCZ6;Q9BWM7	190477	133226	154402
A6NDG6	45003.6	144455	155711
A6NDJ8;Q86YS6	142272	145467	153562
A6NDN0;O43617	195511	217599	305698
A6NDS2;Q86WR7;Q86WR7-2	Filtered	Filtered	Filtered
A6NDU8	13903.3	24882.3	26193.2
A6NDW3;B4DKL4;E9PHD4;Q86X29	61405.3	64959.6	65746.9
A6NDW6;H0YDD3;H0YDQ1;Q9BVK2	Filtered	Filtered	82655.6
A6NDY9	64330.7	88762.6	123092
A6NE20;E7EQL6;F8WB49;O43272;O43272-1;O43272-2	Filtered	Filtered	Filtered
A6NED2;G3V2I3	150041	Filtered	31919.9
A6NEM2	307056	190994	81345.4
A6NEP9;H7BXY6;Q8NG11;Q8NG11-2;Q8NG11-3	18174.3	17422.7	25705.6
A6NES3;E9PL33;E9PM05;E9PS58;O14681	166862	138711	174644
A6NF48;Q9Y2X9	11323.9	14602.4	2477.26
A6NFN2;F5H1G9;F8WA55;F8WA56;Q8IZP0;Q8IZP0-10;Q8IZP0-2;Q8IZP0-3;Q8IZP0-4;Q8IZP0-5;Q8IZP0-6;Q8IZP0-7;Q8IZP0-8;Q8IZP0-9	188493	179746	245490
A6NFN6;Q9ULL5;Q9ULL5-2;Q9ULL5-3	Filtered	Filtered	Filtered
A6NFQ9;A6NMH6;F6W7K9;F8W8I8;Q92599;Q92599-2	121501	119974	138654
A6NFV8;Q96EV8	45317.5	52070.6	69277.7
A6NFX8;Q9UKK9	167026	232898	312904
A6NFY7	71334.6	62104.8	71217.2
A6NG10;B4DFG2;E7EX86;Q969T9	Filtered	Filtered	Filtered
A6NG79;Q92733	70715.8	62154.3	70607.9
A6NGJ4;Q7Z7H8	197817	199535	212129
A6NGW1;O95070	73948.6	78066.8	66972
A6NHB5;A6NHN7;Q14202;Q14202-2	40247.8	33237.8	10532.6
A6NHF2;B4DLJ9;F8W1Q3;P43251	3644.46	4069.27	39488.2
A6NHR9	109482	91665.8	44587.4
A6NHS7	1.26182e+06	968641	922914
A6NI00;P63092;P63092-2;P63092-3	753379	834694	910264
A6NI04;B4E3U2;E9PJM3;E9PL46;Q9UK99;Q9UK99-2;Q9UK99-3	46532.9	Filtered	41434.5
A6NI12;C9JDH3;H7BXQ4;H7BYF2;Q5JRG1;Q9BVL2;Q9BVL2-2	179815	60397.2	238490
A6NIG5;Q969Y2;Q969Y2-2;Q969Y2-3	379885	285192	300325
A6NIH7	118957	93829.6	121038
A6NIR2;Q9Y547	Filtered	62765.4	65681.5
A6NIW1;P14209	52296.6	62314.6	57599.8
A6NIW2;Q5JSL3	26944.2	28950.9	31014.1
A6NJ78	45298.2	41335	45383.1
A6NJD7;Q8IWP9	24650.4	19756.5	21955.3
A6NJF5;Q9UI36;Q9UI36-2	23311.7	Filtered	Filtered
A6NJK7;Q76FK4;Q76FK4-2;Q76FK4-3;Q76FK4-4	26177.6	16276.7	Filtered
A6NJM0;B1AKC9;P29323;P29323-2;P29323-3	49679.6	25650.8	27887.5
A6NJP5;P32189;P32189-1;P32189-2	205937	182531	206664
A6NJX0;A8K7N4;Q9H4F1	Filtered	Filtered	Filtered
A6NJZ6;O75054-2	136468	60936.6	85775.5
A6NJZ9;Q8WTT2	26355.1	22820.7	10847.8
A6NK58	128310	100019	83037.5
A6NKD9	21184.1	19803.7	11498
A6NKF1;F8WC89	66391.2	73370.1	92760.3
A6NKF9;B7ZAQ6;B7ZAQ6-2;B7ZAQ6-3;P0CG08	196704	231841	136726
A6NLH6;Q9P003	173920	180850	273151
A6NMI8;Q9BX70;Q9BX70-2;Q9H0C5	Filtered	Filtered	Filtered
A6NML8;C9J6U3;F5H7I1;O60879;O60879-2;O60879-3	Filtered	4291.68	3671.75
A6NMN0;P46020;P46020-2	16336.8	18188.7	23531.3
A6NMQ1;P09884	135724	170843	187255
A6NN50;O75147	26319.6	12834.2	26197.5
A6NNI4;B4DPP0;G8JLH6;P21926	83415.8	86792.1	97567.9
A6NNL5	76776.2	87867.1	70437.1
A6NNV6;O95229	46418.5	49035.8	57653.6
A6PVM9;F5GYC9;Q9BQI0;Q9BQI0-2;Q9BQI0-3	Filtered	Filtered	52533.9
A6PVN5;Q15257;Q15257-2;Q15257-3	60343.9	33243.1	110453
A6PVT6;A8MSQ5;F5GZV0;F5H083;F8WEA4;Q9NR82;Q9NR82-2;Q9NR82-3;Q9NR82-4	64519.3	23824	Filtered
A6PW55;Q15906	Filtered	Filtered	Filtered
A6PW57;Q99755-2;Q99755-3	46490.5	44547.4	52088.5
A6PWM2;Q6UXH1;Q6UXH1-2;Q6UXH1-3;Q6UXH1-4;Q6UXH1-5;Q6UXH1-6	96222.6	103764	59413.6
A6QRH6;P98173;Q5HY75	19976.5	24920.1	26634.7
A7E2V4;A7E2V4-3;A7E2V4-4;A7E2V4-5	105883	88271.9	54642.7
A7MAP0;Q9ULV4	576152	597539	553142
A8CG34	50879.4	32510.1	41000.6
A8CTX8;A8CTY3;B4DTM2;E7ERJ0	33106.9	26486.1	39866.4
A8K040	53450.5	51091.2	44627.2
A8K092	19980596	17263608	17720206
A8K1B6	850048	831649	722016
A8K1C9;Q96LT9	12117.1	15278.1	6670.32
A8K2U0;F5H2W3	Filtered	477242	Filtered
A8K2U1;F5H225;Q5NDL2;Q5NDL2-2;Q5NDL2-3	9870.44	14332.6	14224.8
A8K327;B4E0V4;Q9UQ49	9562.79	Filtered	19903.2
A8K3Z3;P62195	198476	298534	334301
A8K7Q2	63036.7	78636.7	88121.6
A8MPX7;F5GWL7;Q9H5V9	68189.2	60454.9	46962.9
A8MPX9;O75140;O75140-3;O75140-4;O75140-8	28866.5	18725.9	15354
A8MQB8;G3V0J0;Q06787-2	323367	366348	316990
A8MST6;E7ERV6;E9PHX5;Q5JTW2;Q5JTW2-2;Q5JTW2-3	24696.5	24991.6	20216
A8MT24;E5RGQ3;Q9H446	47349.3	55755.8	69017.2
A8MT69;A8MT69-2;A8MT69-3	9654.34	Filtered	Filtered
A8MT70;A8MT70-2;F2Z370	Filtered	Filtered	Filtered
A8MTC3;C9JWB0;Q7Z5J4;Q7Z5J4-2	2427.47	Filtered	Filtered
A8MTG3;E1P660;H0Y3M2;O43670;O43670-2	140184	102962	58056
A8MTG8;B7Z441;C9JAA7;C9JBY2;F5GWK4;G5E9V6;Q8IUR7;Q8IUR7-2;Q8IUR7-6	505338	416666	210647
A8MTH6;C9J0K6;P30626	2.52123e+06	2.29102e+06	2.04196e+06
A8MTN3;F5H1T9;F5H6S0;P0C7H8;Q9BYR9;Q9BYU5	Filtered	Filtered	Filtered
A8MTT3	43244.3	49266.1	52593.2
A8MTY9;O14972	67017.4	77152.1	78896
A8MU17;F5H2B2;F5H6B6;F5H8A0;Q86TN4;Q86TN4-2	45929.7	37208.2	46081.9
A8MU27;A8MUA9;B4DUW4;P55854	3695772	3354719	2.65697e+06
A8MU44;Q9UJC3	4117.23	6084.31	6035.82
A8MU99;Q9NRP7;Q9NRP7-2	45516.3	51689.8	45982.6
A8MUB1;P68366	60398.1	Filtered	Filtered
A8MUM1;Q53HC9	97365.6	97094.2	117921
A8MUS2	321739	252834	181105
A8MUW5	355542	375394	331879
A8MV58;Q16643;Q16643-2	104703	126532	141750
A8MV89;Q5M775;Q5M775-2;Q5M775-3;Q5M775-4;Q5M775-5	Filtered	Filtered	Filtered
A8MVZ6;F8W113;Q96G01;Q96G01-3	41525	26159	32840.7
A8MWB4;B7Z1T4;O43739;O43739-2;Q15438;Q15438-2;Q99418;Q99418-2	Filtered	Filtered	Filtered
A8MWD3;O15371	494354	581644	620669
A8MWD9;F5H013;P62308;Q49AN9	922008	687877	378014
A8MWK3;P19022	158656	151990	131441
A8MWX0;Q96HR9	86916.6	70096.5	87481.3
A8MWY0	Filtered	Filtered	9147.75
A8MWY4;Q13029;Q13029-2;Q13029-3;Q5THJ1	Filtered	Filtered	Filtered
A8MX09;O94967;O94967-2;O94967-3	4069.76	4946.6	3501.32
A8MXF4;C9JX84;E7ET33;Q06033;Q06033-2	84564.8	77066.3	66966.7
A8MXP7;E9PAJ8;Q6NUT3;Q6NUT3-2	Filtered	Filtered	Filtered
A8MXP9;P43243	684207	439083	191376
A8MXQ1;P53801	465613	129111	191602
A8MXR0;Q9Y608;Q9Y608-2;Q9Y608-4	29718.3	32182.6	32091.4
A8MXV4	526913	465844	514854
A8MYC7;B1AMF0;Q8N2K1;Q8N2K1-2	83529.5	103787	Filtered
A8MYH2;B7WPL9;D6RBU4;D6RFZ8;E9PGM8;F8W9A8;H7BXU5;O43314;O43314-2;Q6PFW1;Q6PFW1-2;Q6PFW1-3;Q6PFW1-4;Q6PFW1-5;Q6PFW1-6;Q6PFW1-7	Filtered	16555.1	Filtered
A8MYQ9;Q9BZG1	33008.1	24571.6	32547
A8MYY3;Q9UPQ9-1	23618.7	23663.7	18493
A8MZF9;P55039	40330	88738.9	123456
A9C4B9;B0V3J0;E7EQB3;Q9BSV6	33076.4	39849.7	52391.1
A9X3U0;Q96GF1	47839.8	47595.2	50008.8
A9Z1X7;E9PCT1;Q8IYB3;Q8IYB3-2	145440	118258	47080.3
B0AZR7;Q13303;Q13303-2	28317.1	29422.9	28966
B0AZS3;B7Z5Z0;B7Z8R1;B7Z9U0;Q9UFF9	75153	43364.1	29624.6
B0AZS9;H0YBC7;H7BXD2;O60238	15864.8	16189.8	30923.8
B0QXZ6;O95503	Filtered	Filtered	Filtered
B0QXZ8;B0QXZ9;Q9UGU5	12000.8	7672.12	Filtered
B0QY29;Q9NWS6	5470.71	10185.5	Filtered
B0QY62;Q9UH99	30862.1	24887.8	26871.2
B0QY89;Q9Y262	285240	380378	330386
B0QY95;Q9NQG6	53758.3	70929.2	47700.7
B0QYK0;B0QYK1;Q01844;Q01844-3;Q01844-5	354311	387503	359708
B0QYM8;Q9HBI1;Q9HBI1-2	Filtered	Filtered	Filtered
B0QYW5;B4DU97;F5GYD1;O43808	12596.3	15135.1	17086.7
B0QZ44;P41229;P41229-2	Filtered	21572.4	15713.6
B0QZ88;Q9H7B4	68808.6	79034.6	83141.5
B0QZE2;B7Z293;B7Z3Z1;E7ENI9;F5H449;F6UH50;Q15326;Q2LD45;Q5BJG6;Q5VUI0	Filtered	Filtered	Filtered
B0S7Q4;F8VSH7;F8VX15;H7C4U4;H7C5B5;H7C5D3;Q0P5T2;Q5SQH8;Q5SQH8-2;Q5SQH8-3	17603.1	12821.7	14093.7
B0S872;G8JLE1;Q9UMR5	127716	128554	126908
B0S8I7;Q14657	16712	40065.7	19528.3
B0UX83;G3V1Z5;P46379;P46379-2;P46379-3	233165	126669	151819
B0UZZ8	43888.6	35964.7	45604
B0V043;P26640	190861	251310	276885
B0YJ65;Q86UU1;Q86UU1-2;Q86UU1-3	37667.4	3619.95	Filtered
B1AH87;P30536	248431	84170.9	124246
B1AH89;Q14166	103160	117634	140382
B1AHH4;B1AHH5;B1AHH6;Q9H7Q0;Q9UIA0	48110.4	30530.2	29219.9
B1AHL2;P23142-4	53909.1	36927.5	53531.8
B1AHQ6;Q9NSP4;Q9NSP4-3	Filtered	Filtered	Filtered
B1AHR1;B1AHR2;B7Z686;Q9UH03;Q9UH03-2	38971.3	49946.8	71132.9
B1AJY5;B1AJY7;O75832	64731	103283	198555
B1AK13;P35914	228234	215695	248205
B1AK44;Q9UI95	53899.7	36751.3	Filtered
B1AK51	Filtered	Filtered	9988.61
B1AK64;Q9HAF1;Q9HAF1-2;Q9HAF1-3	56236.2	20455.2	430830
B1AK87;B1AK88;E7EQ40;P47756-2	451845	556924	501920
B1AKB1;B1AKB2;B1AKB4;P19484	Filtered	Filtered	Filtered
B1AKC7;F8W755;Q9UJF2	88355.3	20326.1	22310.8
B1AKD8;Q5TZA2	39522.2	38151.7	34326.7
B1AKJ5;O43847;O43847-2	159502	42569.1	29854.5
B1AKN3;Q9P2R6;Q9P2R6-2	Filtered	Filtered	Filtered
B1AKR6;Q9NP97	192380	229318	258278
B1AKT6;Q9Y483	64322.9	Filtered	179076
B1AKU4;B1AKU5;F5H591;Q92845	Filtered	Filtered	Filtered
B1ALH6;O14832	4760.42	Filtered	Filtered
B1ALK7;B7Z6G2;Q14155-1;Q14155-5	133487	142705	170311
B1ALM5;Q9P0T7	63939.1	89725.7	131104
B1ALU3;O95490;O95490-2;O95490-5;O95490-6;O95490-7	127558	113873	121408
B1AM27;F5GZ07;F8W8M9;O14795	Filtered	Filtered	22276.7
B1AMS2;F5H1J5;Q14141;Q14141-2;Q14141-4	186103	165053	188490
B1AMV7	Filtered	Filtered	Filtered
B1AMW1;P19256;P19256-2;P19256-3	68968.7	66214.4	83476
B1AN99;F8W7P3;P35030;P35030-2;P35030-3;P35030-4	Filtered	Filtered	Filtered
B1ANH0;Q16774-2	322309	253706	256004
B1ANR0;Q13310;Q13310-2;Q13310-3	1.57815e+06	1.6447e+06	2.05132e+06
B1AP13;E9PSH2;H3BLV0;P08174;P08174-2;Q14UF4;Q14UF5;Q14UF6	486234	413907	548525
B1AP58;P15169	28496.7	23846.6	20876.4
B1APM4;P35610	118861	124800	158263
B1APS8;Q96S38	374052	Filtered	Filtered
B1APY4	63222.7	56866.1	22252
B1AQP1;E9PME6;P22415;Q7Z5Y1	37248	33824.4	Filtered
B1AT46;Q9Y692;Q9Y692-2	48202.8	40103.8	29324.5
B1AVT0;P49760;P49760-3	52487.5	31635	19433.2
B1AVU8;P07602	2.11753e+06	2.14105e+06	2.832e+06
B1AZV3;F5H648;Q03518	50698	39225.8	65519.3
B1Q2X3;P21675;P21675-2;P21675-3;P21675-4	Filtered	Filtered	Filtered
B2CI53;B5M453;D3K174;E9PDL9	75427.2	66402.4	62800.3
B2R603;P07910	54976.7	34077.8	Filtered
B2RD65;Q5PSV4	62293.2	35769.9	21816.8
B2RXF5	62928.5	54646.3	27220.6
B2WTI4;Q6NYC1;Q6NYC1-2;Q6NYC1-3	53125	60186.5	85331.9
B3KMX7;B4DV65;F5H1A6;H0YKU8;H0YL81;H0YLB7;H0YLG0;H0YMI4;Q6JHV3;Q9Y6I4	26404.6	94150.4	Filtered
B3KNT8;F5H4R6;F8VY35;H0YIV4;P55209	882184	1.07292e+06	1.26126e+06
B3KP14;F5H5I6;H0Y8R1;H0YAK1;Q12849	1.72973e+06	1.31017e+06	1.2084e+06
B3KP49;B4DID0;B4DQH9;Q6VN20	11652.3	12487.3	15516.8
B3KP61;C9K000;P31751;Q0VAN0	11257.6	18762.1	21004.6
B3KPJ4;Q8IXK0;Q8IXK0-2;Q8IXK0-4;Q8IXK0-5	22121.3	Filtered	13499.5
B3KPS6	Filtered	Filtered	115857
B3KQ29	Filtered	Filtered	Filtered
B3KQW7;I3L1H5;Q9BZG8;Q9BZG8-2;Q9BZG8-3	11073.9	15983.5	16418.9
B3KR41;Q9Y6D9	21455.1	14732	83143.4
B3KRD1;B7Z4D2;Q9NX95;Q9NX95-2;Q9NX95-3;Q9NX95-4;Q9NX95-5	Filtered	28994.5	Filtered
B3KRF7;E9PC66;P17029	Filtered	Filtered	Filtered
B3KRJ9;Q8WXA9-2	205869	196556	99275.8
B3KRR0;P07992;P07992-3	41523	452915	92490.6
B3KRS5;Q92769	196645	168048	73939.8
B3KRY5;Q6NZI2	45726.9	39057.8	43027.2
B3KS61;O60725	17485	20208.5	120594
B3KSH1;B4DMT5;O00303	664477	858755	800895
B3KSI9;Q9NQ48	360775	241367	45479
B3KSY9;O75925	8215.74	Filtered	Filtered
B3KT25;Q96S55;Q96S55-2	63920.4	53636.9	51958.8
B3KTC7;P49959	187132	151330	112823
B3KTH8;P20265;P20265-2;P20265-3	6926.59	Filtered	Filtered
B3KTI1;P04745;P04746;P19961	14099.4	10905.5	9010.15
B3KTM8;H0YMJ0;Q9UBU8-2	32454.1	42846.7	24536.5
B3KTR6;Q9BRK3;Q9BRK3-2	70746.3	63549.9	55948.2
B3KU92;Q6P2P2;Q6P2P2-2	Filtered	5808.11	8987.44
B3KUB4;O43570;O43570-2	21448.6	26858.7	21283.1
B3KUV7;P37287;P37287-2;P37287-3	14844.8	14965.8	18854.4
B3KV94;F5H7Y2;Q9UGL1;Q9UGL1-2	12782.5	Filtered	Filtered
B3KVH8;I3L4Q4;Q9BUL5	35994.4	22538.6	5848.95
B3KVR1;E7ENP4;P14678;P14678-2;P14678-3;P63162	3.22977e+06	2.3626e+06	1298577
B3KVU0;H7BZK4;Q8WUM9	30609.2	23876.9	27202.2
B3KVZ3;H0Y9E6;Q9H3R5	5170.01	20435.3	27460.2
B3KXE0;P32780	191410	35231.9	171145
B3KXK7;F8VZA2;Q6P1Q0	61431.8	65087.5	135880
B3KXS5;P36776	1.40749e+06	1.59127e+06	1.41315e+06
B3KXW5;O43747;O43747-2	82342	87718.5	96556.2
B3KXX3;Q9UHW9;Q9UHW9-2;Q9UHW9-3;Q9UHW9-4;Q9UHW9-5;Q9UHW9-6	31954	26269	34080.4
B3KY39;Q8TCG2	35373.4	47474.6	50217.5
B3KY94;H3BTV1;O14735	62639	35114.2	50628.7
B3KYA7;Q13188	84445.4	94489.5	76578.8
B3V0L1;F8WCT1;Q66PJ3;Q66PJ3-2;Q66PJ3-3	64597	60858.8	46641.8
B4DDD1;Q8IZ73	33684.1	23527	53966
B4DDF4;B4DUT8;Q99439;Q99439-2	Filtered	17039.5	Filtered
B4DDF7	586844	807878	852146
B4DDG0;B4DEA5;B4DEB8;B4E171;P41732	21784.6	17648.3	29234.1
B4DDG7;Q9BXS5;Q9BXS5-2	127103	161285	139314
B4DDK9;Q10469	41057	45667.3	46657.4
B4DDP2;E7EV43;Q6NW29	50963.6	59002.5	40786.7
B4DDR3	172883	137242	72590.6
B4DDT2;O75191	Filtered	Filtered	Filtered
B4DDT7;F8VYY9;F8W9D1;H0YHF8;P54619	35651.9	40419.2	39625.2
B4DDV1;Q13325	8728.77	9118.16	12196.1
B4DDV3;Q8N6T7;Q8N6T7-2;Q8N6T7-4	Filtered	30594.8	Filtered
B4DDV7;B7ZM03;C9J121;C9J2P9;Q75N03	59745.3	72890.1	Filtered
B4DDY7;B4DNN0;Q5T4K2;Q5T4K3;Q5T4K4;Q9NY26	Filtered	Filtered	Filtered
B4DE11;E7EW45;P78381;P78381-2	4134.22	7684.9	8362.74
B4DE98	9297.94	8886.76	11000.4
B4DEH8;G3V4T2	84602.4	33868.9	Filtered
B4DEI4;B4DKT0;Q9H8Y8	67501.7	84812.9	96213
B4DEN4;E7EV05;E9PFU9;Q8WV99;Q8WV99-2	326126	305871	362650
B4DEX5;C9JA75;E9PDK8;H0Y4B0;O43414;O43414-2;O43414-3	68463.8	76231.9	56873.9
B4DF08;B4DJB7;B7WPA5;B8ZZN1;Q96CS7;Q96CS7-2;Q96CS7-3	Filtered	7999.66	10181.7
B4DF14;P43003;P43003-2	163271	156667	199487
B4DF64;Q68CZ6	4277.58	11512.6	19998.9
B4DFH6	543691	793453	Filtered
B4DFI4;E9PQZ8;H0YEM7;O75143;O75143-2;O75143-3	19754.2	6586.38	Filtered
B4DFQ6;B4DHT5;Q96CM8	169468	156562	136581
B4DFR4;B4DGM3;C0IMW5;Q969G3;Q969G3-2	139104	79693.6	21167.5
B4DFT0;H3BPN6;H3BT78;Q6PHR2;Q6PHR2-2;Q6PHR2-3	Filtered	Filtered	Filtered
B4DFW2;P16035	Filtered	Filtered	Filtered
B4DG42;C9J5M0;C9JC07;C9JJV6;C9JZL8;Q96S97	16590.4	18821.1	12294.1
B4DG62;P19367	2.80637e+06	1.97535e+06	2.21349e+06
B4DGI9;E9PGY0;F5H6Z6;Q99081;Q99081-3	3130.62	5882.31	Filtered
B4DGM2;Q9H875	Filtered	Filtered	Filtered
B4DGM4;Q9NX70	231520	16672.6	8937.18
B4DGR6;Q8NEZ3	Filtered	3406.92	8697.65
B4DGU4;P35222	301609	243050	259366
B4DGX2;P48426	43559.2	44524.1	60856.6
B4DH44;P45985;P45985-2	Filtered	16135.9	18357.4
B4DH52;P78347;P78347-2;P78347-3;P78347-4	546266	531842	388470
B4DH53;Q66K74	64697.4	63563.1	101637
B4DH70;Q9UKB1;Q9UKB1-2;Q9UKB1-3	24116	48305.9	18710.6
B4DHE8;Q96DH6;Q96DH6-2	187819	204736	197596
B4DHJ7;Q12983	Filtered	Filtered	6192.58
B4DHN0;P28482	115753	149663	177971
B4DHP5	486780	1.12644e+06	928355
B4DHY4;B4DT77;P20073;P20073-2	197663	308453	320198
B4DI13;B7Z821;E9PCU2;H0Y3I0;H0Y818;P40692	37187.5	18344.9	Filtered
B4DI41;Q9UIS9;Q9UIS9-4;Q9UIS9-5;Q9UIS9-7;Q9UIS9-8;Q9UIS9-9	19440.2	18359.3	Filtered
B4DI61;O00622	56606.4	39738.3	39041.5
B4DII8;P05067;P05067-8	125329	106806	130001
B4DIJ9;Q59FJ7	Filtered	66580.4	54027.2
B4DIQ0;O60942	75786	70693.5	64212.9
B4DIR7;Q99504	9737.77	11435	11715.3
B4DIV9;B7Z3B1;Q9Y2E8;Q9Y2E8-2	21682.7	19178.1	Filtered
B4DJJ3;Q6NXT6;Q6NXT6-2	29554.5	26071.5	38264.9
B4DJL6;B4DVD5;B4DVT3;H3BRY6;Q96SY0;Q96SY0-3	20971.7	17810	11628.3
B4DJN2;B4DMK1;O95258;O95258-2	43274.8	42037.2	37801.2
B4DJP7;P62318	1.81401e+06	1.12033e+06	672616
B4DJU2;D3DWC4;H7C1W3;Q86VZ5;Q86VZ5-2	Filtered	Filtered	Filtered
B4DJV2;O75390	12885773	11400282	11674963
B4DK30;Q15029	723850	449276	263416
B4DK60;Q8TDN4;Q8TDN4-2	15796.8	16477.9	21851.2
B4DK95;Q9C0D3	7793.58	Filtered	7837.77
B4DKB9;E7EWT6;Q9P1Z2;Q9P1Z2-2;Q9P1Z2-3;Q9P1Z2-4	Filtered	Filtered	Filtered
B4DKC2;Q7L099;Q7L099-2;Q7L099-3;Q7L099-4	58309.9	22922	41740.7
B4DKJ1;Q14CX5	Filtered	Filtered	Filtered
B4DKK6	273763	266870	253406
B4DKR6;O15234	28332.3	26685.7	23084
B4DKX7;Q8IW45;Q8IW45-2	39257.8	37307.4	42673.9
B4DKY1;P49589;P49589-2;P49589-3	68782.5	99173.5	115202
B4DL13;Q9UL03;Q9UL03-3	Filtered	Filtered	Filtered
B4DL14	26520.7	38385.7	48427.7
B4DL54;B4E1A0;H0YHI0;P49356	20466	18471.6	22290.5
B4DLC0	240112	303045	246700
B4DLE8	2807.42	Filtered	42961.6
B4DLH4;Q9H910	156313	225025	266213
B4DLP8;B4DV66;Q9BWT1;Q9BWT1-2;Q9BWT1-3	Filtered	Filtered	Filtered
B4DLP9;Q7KYR7	82587.9	81621.6	119037
B4DLT4;F6UYM1;P23443;P23443-2	35879.6	38662.2	56799
B4DLX8;C9J453;O15344;O15344-2	127337	53878.5	36227.7
B4DLZ9;F8WB55;Q5TDE7;Q5TDE8;Q5VTB9	127910	58730.1	Filtered
B4DM24;C9J9E2;E7ETR1;Q8NCB2;Q8NCB2-2;Q8NCB2-3	21903.5	Filtered	34283.8
B4DMI6;Q5MNZ6	31629	26050.4	24811.4
B4DMU0;P32322	366035	383890	333922
B4DMV3;H7C5G1;Q2TAA2	19959	36421.7	37828.7
B4DN34;Q96GC5	325760	323689	312039
B4DN50;P17302	28296.2	25856	25944.5
B4DN67;Q5W0F9;Q5W0G0;Q96J84;Q96J84-2;Q96J84-3	20332.7	23770.5	22164.5
B4DN88;E7ETU5;P29558;P29558-2	155633	151568	183774
B4DNH5;P58317	Filtered	Filtered	Filtered
B4DNI1;C9K0U0;Q7Z422;Q7Z422-2;Q7Z422-3;Q7Z422-4	41437.3	48321.9	56078.3
B4DNJ6;Q9Y3F4	340700	439685	504130
B4DNR3;F8W9U3;Q96IU4	22117	32353.6	41267.6
B4DNX9;Q14592	Filtered	Filtered	Filtered
B4DP11;Q15185	1.29014e+06	1658240	1.89733e+06
B4DP24;Q9BW60	17078.5	11180.7	12623.9
B4DP27;Q15363	35231.2	54141.5	44381.1
B4DP36;E7ENK0;E9PBE5;Q13137	43033.4	Filtered	36667.7
B4DPC1;F5H869;H0Y6D8;P20226	Filtered	Filtered	Filtered
B4DPR4;C9J494;Q9H000	85313.9	70195.2	60865.2
B4DPR9;Q99551	53897.4	39206.9	53754.4
B4DPV8;Q8NC54	154521	133654	159255
B4DPW7;E7EQF4;E9PDG2;G3XAB1;H7C3C0;Q9HBG6;Q9HBG6-2;Q9HBG6-3;Q9HBG6-4	38956.9	62510.8	Filtered
B4DPY8;F6TTN0;O94842	32061.2	19571.6	10371.5
B4DQ14;Q9BY44	172257	236695	253684
B4DQ19	69040.2	78177.1	64201.4
B4DQ42;E7ENF4;Q9HC62	910942	64109.8	475160
B4DQ47	Filtered	15698.8	13828.4
B4DQE4;P10588	43725.2	51598.9	253508
B4DQI6;B4DUA9;Q13595	309458	209346	66474.6
B4DQJ8;P52209	156005	158471	207213
B4DQK0;Q96BI3	140948	137660	116511
B4DQL2;Q9HD23;Q9HD23-2	22528.1	19316.2	25353.1
B4DQM7;Q15036	Filtered	Filtered	Filtered
B4DQQ4	Filtered	Filtered	Filtered
B4DR12;E9PB19;O60291;O60291-2;O60291-3;O60291-4	2333.38	Filtered	2481.22
B4DR21;Q14703	Filtered	Filtered	6597.42
B4DR31	57804.8	84749.3	110074
B4DR61;P61619	65360.6	73972.3	116467
B4DR70;P35637;P35637-2	1.91838e+06	1.4694e+06	1.0513e+06
B4DR80;Q9Y6E0;Q9Y6E0-2	189108	208706	218049
B4DR87;Q02809	550272	583706	656240
B4DRD7	32034.1	36121.1	Filtered
B4DRF9;P18846	564329	816851	773870
B4DRL5;Q5JVZ5;Q96JJ3	40997.5	39675.1	36792.2
B4DRL9;P24386	Filtered	Filtered	Filtered
B4DRN7;F5H2A1;Q86YS7;Q86YS7-2	108875	115197	197023
B4DRN8;Q2TB82;Q5W0Z9;Q5W0Z9-3	82481.2	76304.7	77288.8
B4DRT2;Q92552	231386	273601	276646
B4DRY3;Q7L9L4;Q9H8S9	36160.9	56473.6	62438
B4DS44;Q8N1B4	61604.4	62954.4	64442.7
B4DS52;C9JY70;H0Y997;Q96J42;Q96J42-2	54703.3	51584.2	81133.2
B4DS80;F5GZN7;Q86V97;Q8WVZ9	95311.6	Filtered	Filtered
B4DS82;Q14457	8710.41	27036.2	38116.2
B4DSD4;Q5T8U9;Q5T8V1;Q8N4J0	9648.2	12722.4	14923.8
B4DSM5;G3XAG1;Q96ME7	19694.8	12673.8	58695.8
B4DSN4;E7EML5;E7ET57;Q8NHM5;Q8NHM5-2;Q8NHM5-3;Q8NHM5-4	8911.13	Filtered	Filtered
B4DSS3;F5H5A3;Q8IVH8;Q8IVH8-2;Q8IVH8-3	18040.3	18842.8	20828.6
B4DST0;O43463	Filtered	Filtered	Filtered
B4DT16;F5H2Y4;Q9H165;Q9H165-2;Q9H165-6	Filtered	Filtered	Filtered
B4DT31	86453.4	112352	86174.5
B4DT35;Q7Z3B4	269482	222945	177671
B4DT67;Q9NUQ6;Q9NUQ6-2	51582.7	47826.8	56446.3
B4DT74;I3L295;O75352;Q1HDL3;Q96K24;Q9H3L2	91008.9	96700.4	98958.1
B4DTA3;Q96AG3	Filtered	53820.7	41892.2
B4DTC3;H7BXN2;Q14103-2;Q14103-4	Filtered	Filtered	Filtered
B4DTE8;C9J7K9;O15162	37331.1	45984.1	60167.2
B4DTG2;P26641	2.14112e+06	2.47552e+06	2.36903e+06
B4DTG6;Q8ND56;Q8ND56-2	53985.9	71872.4	65089.3
B4DTU0;Q13740;Q13740-2	348316	340824	341506
B4DTZ6;P19634;Q5TBB2;Q5TBB3	15998.7	15514.5	21000.8
B4DTZ7;Q68DH5	20550.7	19876.8	23628.7
B4DUB1;H0Y3K1;Q9BWU1;Q9BWU1-2	35126.4	21472.2	25210.5
B4DUD5;E7EWR4;P33240;P33240-2	325300	237878	89275.3
B4DUE9;F5GY47;Q13530	7268.7	Filtered	Filtered
B4DUS5;Q96B01;Q96B01-2;Q96B01-3	Filtered	Filtered	Filtered
B4DV38;E9PC61;H3BQM0;Q8NDF8	Filtered	Filtered	Filtered
B4DV79;F8W8C8;P55884;P55884-2	579511	685256	623344
B4DVE7;E9PDK5;P50995	549499	752990	891926
B4DVN1;O75190	33664.9	33313.9	52600
B4DVP2;Q9Y478	21746	21027.7	19432.1
B4DVQ4;Q86Y37;Q86Y37-4	Filtered	Filtered	Filtered
B4DVQ5;Q99613	457709	491154	469590
B4DVZ5;Q92791	50681.4	65360.9	66896.7
B4DW92;Q86WQ0	9441.21	11359.2	22591.3
B4DWD7;Q53TN4	Filtered	13516.9	Filtered
B4DWI1;Q9UJ83	293944	293420	341730
B4DWS0;C9JGX3;Q96F24;Q96F24-2	Filtered	Filtered	Filtered
B4DWT2;Q5JW54;Q5JW58;Q9H410;Q9H410-2;Q9H410-3	39825.6	31190	14972.1
B4DWW1;P40616	47768.3	34071.8	106206
B4DX32;F5GXB3;O60870	17431.4	21252.3	10033
B4DX68;Q96KB5	35968.2	33954.6	75292.4
B4DXA1;I3L3Y9;I3L4X7;Q13227	201986	227465	Filtered
B4DXL3;H3BPM8;Q13286;Q13286-2;Q13286-3;Q13286-4	41019.6	34474.5	42018.7
B4DXP5	211558	223155	177555
B4DXR9;B4E159;D6RB60;D6RGC2;D6RIY0;E5RGH0;E9PN20;F5H663;Q15928;Q3SXZ3;Q8IYB9;Q8TB69	Filtered	Filtered	Filtered
B4DY08	16822364	7.90503e+06	4372963
B4DY26;F8W1R9;P36897;P36897-2;P36897-3	18178	18397.4	30818.4
B4DY38;E7EPF0;Q9NP64;Q9NP64-2	67427.3	57546.1	22067.4
B4DY81;Q9UNS2	66562.5	86345	100584
B4DYB4;Q8NFH5	435331	335983	235613
B4DYM7;Q6UVJ0	17738.9	44119	39430.8
B4DZC3;Q9H0D6;Q9H0D6-2	102431	83307.3	59607.1
B4DZI8;P35606	548241	543020	490442
B4DZM7;E7ERJ8;E9PFK9;H7BYE7;Q3HKR1;Q9UJ41;Q9UJ41-2;Q9UJ41-3	215886	169960	203106
B4DZV1;C9K053;F5H175;G5E9H3;Q49AM3;Q49AM3-2	Filtered	Filtered	Filtered
B4DZX6;G8JLA9;H7BYZ6;Q9Y575;Q9Y575-2	21360.1	25987.1	28465.7
B4E040;P11234	153114	474475	103611
B4E0K5;Q16539	20174.9	22873.7	29817.6
B4E0K9;G5E928;O00754	175004	151162	201151
B4E0P8;Q04323	139419	171327	190573
B4E0T7;Q96II8;Q96II8-2	35898.7	55924.6	33806.4
B4E0X8	840431	744789	698013
B4E0X9;P48553	Filtered	20325.6	18213.2
B4E0Y9;Q8NBY1;Q9P289	184146	234131	242059
B4E1D3;P02675	51225.2	57996.9	97052.4
B4E1G1;Q9BUN8;Q9BUN8-2	142377	145286	210666
B4E1J0;F5H2F6;F5H6Z1;Q96AQ6;Q96AQ6-2;Q96AQ6-3	14085.7	Filtered	27562.6
B4E1K0	27303	25882	27532.3
B4E1N7;P01106	54113.1	49029.6	Filtered
B4E1S6;P31431	Filtered	Filtered	27486.4
B4E1W4;E7EU88;Q9P2N6;Q9P2N6-2;Q9P2N6-3;Q9P2N6-4;Q9P2N6-5;Q9P2N6-6	Filtered	Filtered	Filtered
B4E241;P84103	4439146	2675722	1.57852e+06
B4E2D5;E7ER46;F5GX46;Q8NEM7;Q8NEM7-2	90910.1	73514.7	136900
B4E2G8;F6XBD8;P35221;P35221-2	1596486	219558	229907
B4E2J0;Q6P2Q0;Q9NP78;Q9NP78-2	23587.9	564652	28009.5
B4E2N0;Q8WZA0	150661	65241.6	66421.6
B4E2P0;G3V4A5;O75586	26265.6	19442.1	Filtered
B4E2P2;C9JA28;Q9UNL2	36793	42209.7	74483.1
B4E2S7;P13473-2	1.87711e+06	1.89422e+06	2.12315e+06
B4E2V5;P27105	359502	311269	361170
B4E2X3;Q8N6R0	52842.7	119028	179352
B4E3E5;Q92997	211092	175936	109772
B4E3J8;F5H277;H0YGN4;Q15208;Q9Y2H1	Filtered	Filtered	Filtered
B4E3T4;F5H357;Q93062;Q93062-2;Q93062-3;Q93062-4;Q93062-5	10568.4	44739.1	6895.49
B4E3W0;G5E9D4;Q96EB1;Q96EB1-2	Filtered	12948.1	13722.8
B5B2M6;E7EMS4;E7EP33;O95644;O95644-2;O95644-3;O95644-4;O95644-5;O95644-6;O95644-8	78686.5	71798.7	Filtered
B5MBW9;H0YBG0;Q8WYQ3	231412	165291	151213
B5MBX0;Q96FF9	Filtered	Filtered	Filtered
B5MBZ0;Q9HC35	70275	85902.4	97834.5
B5MBZ5;Q9HCN4;Q9HCN4-2;Q9HCN4-3	11900.7	12400.8	12922.2
B5MC00	Filtered	Filtered	36894.5
B5MC02;G5E9C6;Q8NFT2;Q8NFT2-2	52760.8	37471.1	44169.6
B5MC40;Q86YP4;Q86YP4-2	43398.1	22545.9	13949.9
B5MC53;B5MCF8;P39210	47190.1	52717	57033.4
B5MC72;Q96DZ1	81744.7	80377.2	85729.3
B5MCA1;Q96G28;Q96G28-2	Filtered	Filtered	Filtered
B5MCD7;O43759;O43759-2	85203.6	101714	94095
B5MCF9;O00541	100741	84565	71343.8
B5MCG1;P84101	12335.7	14951.6	19337.2
B5MCQ5;B7Z254;F8WA83;Q15084;Q15084-2	5.05948e+06	5.22892e+06	6093677
B5MCW3;H7C127;H7C128;H7C179;Q9H0E9;Q9H0E9-2;Q9H0E9-4	50207	47250	Filtered
B5MDE0;Q96AA3	51952.6	45313.4	43115.6
B5MDF5;P62826	4.04333e+06	3.74736e+06	5212098
B5MDL5;F6TXG5;P53778	Filtered	Filtered	Filtered
B5MDQ0;Q2NKX8	40485.4	28722.9	43381.1
B5MDU6;Q9H6V9;Q9H6V9-2	90405.7	87292.7	94437.3
B5ME50;E7EMY0;E7EP16;E7ERA9;Q71SY5;Q71SY5-2;Q71SY5-3;Q71SY5-4;Q71SY5-5	62093	40959.2	25769.8
B5ME91;Q53EL6	253890	390330	422657
B5ME97;E7EW69;E7EX04;Q9P0V9;Q9P0V9-2	66826.2	69658.1	74050.7
B5MEB7;Q8WXE1;Q8WXE1-2;Q8WXE1-3	65069.4	86227.9	98422.1
B5MEC7;Q9BZL4;Q9BZL4-2;Q9BZL4-3;Q9BZL4-4	9279.63	6420.78	10083.7
B5MEE5;C9JLZ9;C9JM97;C9K0L0;F8W9P9;Q8WXG6;Q8WXG6-2;Q8WXG6-3;Q8WXG6-4;Q8WXG6-5;Q8WXG6-6;Q8WXG6-7	4938.4	5467.1	7569.38
B5MEG5;E7EN22;E7EST9;E7ETS0;E9PEG8	34158.8	31108.9	45025.2
B6ZDS1;C9J4X5;Q9H160	Filtered	Filtered	Filtered
B7WNP8;Q7Z392;Q7Z392-3;Q7Z392-4	34594	32469.8	50808.1
B7WNT5;D4PHA3;E2GH20;E9PDK3;F8W742;F8W7T5;G8JLE2;H0YAR8;H0YBC8;H0YBP2;H0YEE5;P36402;P36402-10;P36402-11;P36402-12;P36402-13;P36402-14;P36402-15;P36402-16;P36402-2;P36402-3;P36402-4;P36402-5;P36402-6;P36402-7;P36402-8;P36402-9;Q5JRY3;Q5JRY4;Q5JRY5;Q9NQB0;Q9NQB0-10;Q9NQB0-2;Q9NQB0-3;Q9NQB0-4;Q9NQB0-5;Q9NQB0-6;Q9NQB0-7;Q9NQB0-8;Q9NQB0-9;Q9UJU2;Q9UJU2-3;Q9UJU2-5;Q9UJU2-6	Filtered	Filtered	Filtered
B7WP27;Q9HCG8	52749.8	34835.3	28401.5
B7WPG3;C9J9G0;Q5JB52;Q8WVV9;Q8WVV9-4	472793	348848	183605
B7Z1I8;O75461	Filtered	Filtered	Filtered
B7Z1J2;D6RAC5;D6RH18;E9PB74;E9PDA8;P81877;Q9BWW4;Q9BWW4-2;Q9BWW4-3	Filtered	Filtered	Filtered
B7Z1J9;Q8NB37	393650	64133.7	69121.5
B7Z1T1;H7BYE5;O00258;O00258-2	20896.8	20605.4	46874.5
B7Z1T6;E5RHV0;E5RHY8;E5RI52;Q6NTE8;Q6NTE8-2	Filtered	Filtered	Filtered
B7Z1Y4;B8ZZV9;B8ZZX2;Q9H8M1	7347.84	13133.2	6567.18
B7Z202;E9PEY4;F5GZG4;G5E9F6;O60941	72345.7	85997.8	35534.3
B7Z287;Q9NP50	Filtered	Filtered	Filtered
B7Z2A4;P18433;P18433-2;P18433-3;P18433-4	110341	78912.8	91562.3
B7Z2A7	30410.6	33472.3	23980.2
B7Z2D6;P35520;P35520-2	90337.3	140767	183705
B7Z2I1;C9J3K0;F5H6X3;Q96JH8;Q96JH8-1	Filtered	7979.28	Filtered
B7Z2L7;B7Z2U2;F5GXH5;F5H3S6;Q6ZVM7;Q6ZVM7-2;Q6ZVM7-3;Q6ZVM7-4	Filtered	48164	65889.5
B7Z2R4;E9PEH6;G5E9K6;O43556	Filtered	16699.5	Filtered
B7Z2S5;E7ESI6;Q16881;Q16881-3;Q16881-4	58752.5	74080.3	94879.1
B7Z2T7;O15075;O15075-2;Q5VZY9	10186.1	9943.28	13002.4
B7Z2Y2;B7Z7N2;F5H1E5;Q14746;Q14746-2	33763	30646.9	44744.5
B7Z2Y5;O75582	23461.4	33864	42901
B7Z355;C9IZI7;C9J7Z4;G5E9Q3;Q8NCE0;Q8NCE0-2;Q8NCE0-3	Filtered	Filtered	Filtered
B7Z367;D6RJ07;Q9UL40	70269.8	56104.3	46152.9
B7Z382;P49902	15999.7	19704	17928
B7Z3K8;Q9Y2Z9	158581	144226	135467
B7Z3N3;Q6P1A2	299464	Filtered	Filtered
B7Z3P9;B7Z4N7;F5H2Q9;F5H7Q0;G5E9G3;Q8IXQ5;Q8IXQ5-2	16461	24934.1	Filtered
B7Z468;B7Z574;E7ES10;E7ESM9;E7EVY3;E9PCH5;G5E946;G5E9D3;P20810;P20810-2;P20810-3;P20810-4;P20810-5;P20810-6;P20810-7	30174.5	42865.8	49503.3
B7Z473;F5GYS0;H0YGC8;Q8NCS7;Q8NCS7-2;Q8NCS7-3	62110.3	37736.6	58940.4
B7Z4B9;Q86SQ9;Q86SQ9-2;Q86SQ9-3	31056	23949.9	24356.5
B7Z4K6;O00115	560367	483205	634118
B7Z4L1;B7Z4U3;C9JU30;E7EPD9;H7BXS2;Q9NRC1;Q9NRC1-4	39259.3	Filtered	58444.4
B7Z4M2;O75554	Filtered	Filtered	Filtered
B7Z4Q3	324350	343322	281430
B7Z4R5;E7EPF7;Q99571	40946.1	24045	33210.9
B7Z4S8;Q99538	54718.3	45677.7	79860.7
B7Z4U0;Q969M1	206673	186465	206269
B7Z4V2;P38646	12055993	10716082	10452535
B7Z4V9;Q9BT40;Q9BT40-2	43284.7	37463.9	29564.9
B7Z4X2;E7EQB2;E7ER44;P02788	441512	533641	565354
B7Z4Y6;P05186;P05186-2	20210.2	13772.8	18952.7
B7Z549;F5H7E1;P19827	4838.41	5378.75	3595.74
B7Z560;Q9NV88;Q9NV88-2	33217.1	27217.5	12844.7
B7Z5B0;E7EMV7;E7EPY1;E7ERB0;E7ET96;E7EW15;F5GYD7;F5H4X3;Q15025;Q15025-2;Q6N077	Filtered	Filtered	Filtered
B7Z5J4;Q9UI42;Q9UI42-2	Filtered	Filtered	Filtered
B7Z5N6;B7ZBU3;E7EQG4;E9PDG7;H0Y6Y1;Q5T1V6;Q5T1V6-2;Q5T1W1	Filtered	Filtered	Filtered
B7Z5R1;G3V2I6;G3V3X1;P31749	18832.5	31401.2	42006.9
B7Z5U5;Q9H4Z3	10896.8	13850.9	Filtered
B7Z5W1;Q9Y624	140035	128874	132138
B7Z5Z2;P62070	230132	236487	108389
B7Z660;C9JS40;Q5VZ89;Q5VZ89-2;Q5VZ89-3;Q5VZ89-5;Q5VZ89-6	Filtered	13661.2	8354.78
B7Z6B8;Q16698	304383	237335	270805
B7Z6C0;H0YFA4;P52943	6972.09	5774.74	10671.2
B7Z6F5;C9JFB2;Q9Y548	Filtered	Filtered	Filtered
B7Z729;Q92484	76645.2	63471.3	68050.8
B7Z765;Q9UL01	Filtered	Filtered	39672.7
B7Z7D3;Q9BXW6	Filtered	Filtered	Filtered
B7Z7P8;P62495;Q96CG1	376481	463833	517152
B7Z7V7;F5GYW7;G5E9F1;Q96RG2;Q96RG2-2	Filtered	Filtered	14700.6
B7Z7X8;Q8NHH9	104564	114529	142346
B7Z800;P55263;P55263-2	44528.8	39335.9	47043.7
B7Z806;P13807;P13807-2	140244	155398	212061
B7Z817;Q15392	75989.1	72574.6	108341
B7Z831;D2DFB0;F5H4A4;Q9NZH0	32822.2	26495.8	69608.8
B7Z8C9;Q5TAQ9	32979.5	37608.5	34320.4
B7Z8G2;Q13451	54679.7	67138	82215.2
B7Z8R4;E9PCX3;Q15723;Q15723-1;Q15723-2;Q15723-3	25454	10057.4	Filtered
B7Z8T0;F5H203;Q00536	92201	77684.1	68444.8
B7Z8V9;B7Z929;Q9H336	Filtered	Filtered	10406.6
B7Z8Y7;O94762	20205.9	26265.9	18797.4
B7Z976;O60704	Filtered	Filtered	Filtered
B7Z984;F8VPI1;F8VPZ7;F8VQQ5;F8VQW0;F8VR05;F8VSI7;F8VVJ4;F8VX73;F8W086;F8W1G3;F8W201;P55061	5088.46	Filtered	Filtered
B7Z9G5;Q5VW32	56858.9	93437.1	120666
B7Z9I3;O75787	40663.2	52518.9	40916.5
B7Z9L2	Filtered	Filtered	Filtered
B7ZAA0;E7EQE2;E9PC65;E9PH88;P54277;P54277-3;Q3BDU3	27186.4	20859.2	Filtered
B7ZAS8;F5H2X7;H0Y5D5;Q5SYW2;Q9BTG3;Q9ULV3;Q9ULV3-2	45090.1	23306.8	Filtered
B7ZAX5;Q01415;Q01415-2	203535	32389	40374.3
B7ZB80;P21953	629806	592555	623850
B7ZC38;Q9NR46	26648	29620.9	33489.5
B7ZKJ8;E9PGN5;F5H194;Q14624;Q14624-2	19750.1	Filtered	14307.8
B7ZKK9;Q16537	36128.2	44571.3	48172.3
B7ZKM0;Q15020	104436	130262	136138
B7ZKM8;O95487;O95487-2	226696	185626	219014
B7ZKN0;Q92859;Q92859-2;Q92859-3	74717.3	51898.2	43049.8
B7ZKQ9;Q8WTV0-2;Q8WTV0-4	104672	140916	163462
B7ZKS7;Q86UV5	76166.7	56190	42674.8
B7ZKT7;Q9BQS8	105355	96600.4	120001
B7ZKZ4;E7EWY8;P43694	6441.16	Filtered	Filtered
B7ZL00;D6REX3;H7C2W3;O94979;O94979-2;O94979-3;O94979-4;O94979-6;O94979-8	230039	295994	330154
B7ZL11;C9JY66;Q9BZ95;Q9BZ95-2;Q9BZ95-4	33635.3	6565.06	Filtered
B7ZL31;F8WBF5;P49759;P49759-3;Q9HAZ1	Filtered	Filtered	Filtered
B7ZL88;Q8N8Q8	18414.6	17817.7	19648.5
B7ZLE7;P53355;P53355-3	Filtered	Filtered	Filtered
B7ZLM8;H0YNM1;P30047	Filtered	Filtered	Filtered
B7ZLN5;Q17RB6;Q9ULD4	Filtered	Filtered	Filtered
B7ZLQ8;E5RJM0;Q17RY0;Q17RY0-2	42388.8	41222.9	41162
B7ZLX3;E7EUA5;F5GWS0;Q7Z460-2;Q7Z460-3	30866.3	37905.6	34610.6
B7ZLZ2;Q9BZQ6	54322.9	38210.7	51405.3
B7ZM82	39277.8	17772.3	Filtered
B7ZMG0;E9PGC5;F5GXI4;Q15262;Q15262-2;Q15262-3;Q5TG12	24021.2	24907	25315.4
B7ZMI4;E7EPZ1;F5H1U9;O75970;O75970-2;O75970-3	Filtered	23542.1	Filtered
B8QGS9;Q99959;Q99959-2	62945.3	45701.9	44388.5
B8ZZ87;H7C173;Q6NZ67	259226	317589	204415
B8ZZA1;B8ZZQ6;B8ZZW7;H7C2N1;P06454;P06454-2	37656.6	84444.2	138062
B8ZZC8;B8ZZE3;B8ZZY8;E7EMN2;F5GXZ1;F5H4E8;Q9NRN9	Filtered	11458.1	9294.05
B8ZZD4;E7ENV2;Q86VP1;Q86VP1-2	Filtered	Filtered	Filtered
B8ZZF6;C9J128;C9J173;C9J2Z6;E7ENF2;E7ET59;E7EUX4;P49441	Filtered	Filtered	Filtered
B8ZZJ1	52278	55854.5	65959.3
B8ZZJ9	383048	377004	204849
B8ZZN6;P63165	1.0847e+06	859570	443603
B8ZZT7;Q9UK76;Q9UK76-2	103618	163714	221398
B8ZZV6;B8ZZY4;Q8WV83;Q8WV83-2	8230.78	Filtered	Filtered
B8ZZW9;Q8N3F0;Q8N3F0-2	Filtered	11750.8	23347.1
B9A018;Q53GS9	181539	151553	100063
B9A054;Q8TEB9;Q8TEB9-2	52786.7	Filtered	255260
B9EG97;E9PEP7;P08048;P08048-2;P08048-3;P17010;P17010-2	Filtered	Filtered	Filtered
B9EGA3;Q92925;Q92925-2;Q92925-3	88635.9	43864.6	18721.4
B9EGP5;F8VWA6;F8W1Z6;Q7Z3U7;Q7Z3U7-2;Q7Z3U7-3;Q7Z3U7-4	Filtered	9452.2	30245.9
B9EK38;E7EQJ8;Q6GYQ0;Q6GYQ0-2;Q6GYQ0-4;Q6GYQ0-5;Q6GYQ0-6	37689.5	36547.8	33843.2
B9ZVR8;C9JV64;Q70CQ2;Q70CQ2-2;Q70CQ2-3	54094.3	20587	26379.2
B9ZVV8;E7EN68;Q53H47	Filtered	Filtered	Filtered
C0H5Y7;Q16611	72211.4	75900.8	72163.8
C4AM86;Q92764	Filtered	Filtered	Filtered
C4AMA3;I3L2N9;O76011	Filtered	Filtered	Filtered
C4AMC7;Q6VEQ5	177911	170348	184725
C4P093;C4P0B0;E2QRA4;F5H1F1;Q5T409;Q9NRI5;Q9NRI5-2;Q9NRI5-3;Q9NRI5-4;Q9NRI5-5;Q9NRI5-6;Q9NRI5-7;Q9NRI5-8	6299.43	6992.65	3416.25
C6GKU9;Q96HR3	18149	9924.91	Filtered
C9EI59;Q9H7T9	Filtered	Filtered	Filtered
C9IY53;F8W8D3;Q14493	24538.8	23152.4	20418.2
C9IYG0;H7C1Z7;H7C270;Q9GZU7;Q9GZU7-2	42166.1	35987.6	33641.8
C9IYL4;P29083	27952.2	26516.5	39754.8
C9IYN9;E2QRN5;F8WEJ9;Q6GMV2	23617.8	22719.6	26700.8
C9IZI4;H7BXR8;H7C5Z9;Q14CB8;Q14CB8-2;Q14CB8-3;Q14CB8-5;Q14CB8-6;Q14CB8-7;Q8NA01	Filtered	Filtered	9051.84
C9IZU6;Q969T4;Q96LR5	Filtered	66890.8	56181.3
C9J016;Q9H977	Filtered	27785.7	Filtered
C9J066;Q8N4C6;Q8N4C6-10;Q8N4C6-2;Q8N4C6-4;Q8N4C6-7	401273	488082	644897
C9J0E4;P01040	Filtered	Filtered	Filtered
C9J0F0;E7ETP1;E9PFD3;F5GYL1;G5E965;G5E9V8;H0Y882;Q8NAN6;Q9H334;Q9H334-2;Q9H334-3;Q9H334-4	4590.56	5003.48	3958.83
C9J0I9;Q86WB0;Q86WB0-2	18839.8	16095	28492.8
C9J0J0;Q96EE4	5325.59	5629.35	Filtered
C9J0J7;G5E9Q6;P35080-2	190931	276991	313316
C9J0Q5;C9J239;C9J7T7;C9JE98;C9JFD3;C9JJF6;Q9Y618;Q9Y618-3;Q9Y618-4;Q9Y618-5	25077.3	Filtered	70838.7
C9J0W7;C9JNM5;F8W782;Q96A54	Filtered	46662.5	28418.9
C9J114;C9JV08;P17181;P17181-2;P17181-3	Filtered	Filtered	Filtered
C9J154;F2Z3A6;F8W8C2;Q9HBM0	Filtered	27615.6	15736.3
C9J164;C9K0J5;Q70E73;Q70E73-2;Q70E73-3;Q70E73-4;Q70E73-5;Q70E73-6;Q70E73-7;Q70E73-8;Q70E73-9	8269.63	11553.4	9260.33
C9J1C6;C9J391;F8WBU5;H7C426;Q9P0P0	14263.7	28621.4	23340.5
C9J2F8;Q5JS54	5342.53	12939.9	26337.3
C9J2G7;C9JCG1;C9JRS3;C9JTC5;E7EN86;E7ER34;E9PJF2;E9PLN4;E9PLS7;E9PMY8;E9PPB0;E9PS81;P52747;P52747-2	49136.5	29743.1	Filtered
C9J2K4;Q16864	96283.5	114703	137783
C9J2P0;C9J8K2;H7C061;P51965	Filtered	Filtered	Filtered
C9J2U4	585378	478570	529931
C9J2Y9;P30876	87232.4	73994.5	70379.3
C9J384;E9PHS3;Q9BQ75	118045	116319	97520.7
C9J3D7;E7EQF2;Q9UKG9	45482	30340.6	34825.6
C9J3F9;C9JW41;Q9NQ55;Q9NQ55-2	138394	111754	106865
C9J3L7;C9J7N1;C9JYJ8;C9JZE3;E7EVL6;Q9BWE0	2779.43	3896.59	3598.92
C9J3Q3;C9J6N5;C9J6Y8;C9JP05;C9JQ40;C9JW51;C9JYP1;Q9H098;Q9H098-2	11954.3	Filtered	18062.6
C9J406	Filtered	Filtered	9943.77
C9J412;Q7Z736;Q7Z736-2;Q7Z736-3;Q7Z736-4	49435	31670.9	40718.7
C9J436;G3XAL7;Q96M27;Q96M27-2;Q96M27-3	250210	205267	243651
C9J4G0;F8W038;Q8IXM2	109779	75837.3	71192.5
C9J4K5;C9JSP0;F8W8A5;F8WD19;H7C006;H7C1C1;H7C1M7;H7C304;Q9NYP3;Q9NYP3-2;Q9NYP3-3	Filtered	17096.7	Filtered
C9J4P6;E7EUS0;Q6E0U4;Q6E0U4-2;Q6E0U4-3;Q6E0U4-4;Q6E0U4-5;Q6E0U4-6;Q6E0U4-7	Filtered	Filtered	Filtered
C9J502;D0UFD1;D0UFD3;D3YTI0;P55327;P55327-2;P55327-3;P55327-4	33334.1	50249.1	42651.7
C9J5C7;C9JU06;C9JZ00;F8WC44;Q86W33;Q86W33-2;Q86W33-3	Filtered	Filtered	Filtered
C9J5J4;H0Y322;H7C4T7;Q5TKA1;Q5TKA1-2;Q5TKA1-3	30216.2	18054.4	Filtered
C9J5N1;Q9BTE6;Q9BTE6-2;Q9BTE6-3	314462	276800	216104
C9J5X1;P08069	194357	188843	199193
C9J6I6;C9JMV9;Q03154	17435.1	21662.2	40799.7
C9J6P4	82468.3	117700	91130.1
C9J6W2;Q96Q89;Q96Q89-2;Q96Q89-3	25527126	27621976	27498772
C9J712;P35080	143784	202778	236633
C9J7E5;Q9Y5L0;Q9Y5L0-1	55223.4	63973.9	56349.9
C9J7E8;Q9UL63;Q9UL63-2	16455.3	18546.9	12970
C9J7M1;O95749	15076.3	34349.3	44181.9
C9J8D0;C9JA69;F8W9C0;Q8WY36;Q8WY36-2	17272.1	8251.51	Filtered
C9J8E1;Q16644	Filtered	Filtered	36480.5
C9J8U1;F5H1H6;F8WAN1;H0Y3Q3;Q69YQ0	40720.2	24243	53454.1
C9J959	37881.6	36869.7	26224.7
C9J9I1;Q9C0D9	Filtered	Filtered	Filtered
C9J9K3;P08865	10909734	10967226	12509577
C9J9V6;O75414	198524	167548	192363
C9JA05;D6RD17;D6RHJ6;P01591	Filtered	Filtered	98041.4
C9JA08;Q96D46	52520.2	67530.7	71087.2
C9JA65;O00458	36219.6	55889.1	57949.4
C9JA77;P13646-2	141916	164742	Filtered
C9JAB2;G5E9M3;Q16629;Q16629-2;Q16629-3	2796908	1.69399e+06	763203
C9JAK5	137651	103061	134098
C9JAL9;Q9BZE9;Q9BZE9-2;Q9BZE9-3;Q9BZE9-4	36183.7	Filtered	Filtered
C9JAX1;Q16595	54633.2	57135.3	50595.3
C9JB30;Q9UPY8;Q9UPY8-2	30997.5	37957.9	54190.1
C9JBG5;Q8NBJ9;Q8NBJ9-2	36828	35988.3	39965.2
C9JBL1;Q9Y6A9	74995.6	87152.8	114046
C9JBY7;F5H3P2;Q9Y291	662241	553995	522155
C9JBZ4;Q9BT25;Q9BT25-2	32697.7	32344.3	26504.5
C9JC60;G5E977;Q6XQN6;Q6XQN6-2	Filtered	Filtered	44839.9
C9JC84;C9JEU5;P02679;P02679-2	Filtered	Filtered	Filtered
C9JCC6;E9PNC7;Q14919;Q14919-2	64041.5	64079.6	53070.5
C9JCW7;C9JE12;Q9BVT8	57712.1	48423.6	77864.8
C9JD84;E7EV71;Q14766;Q14766-2;Q14766-3;Q14766-4;Q14766-5	Filtered	Filtered	Filtered
C9JDG0;Q9NSV4	38633.1	35106.2	33685.3
C9JDM9;H0Y7R9;Q9NYQ6;Q9NYQ6-2	62370.4	52874.1	62107.3
C9JE15;H7C4I2;Q7Z695	Filtered	Filtered	44099.3
C9JEH3;C9JG97;Q13685	118092	155082	193420
C9JEJ2;P49585	170155	134591	152437
C9JF17;P05090	Filtered	142434	26305.8
C9JF58;H7C0S2;Q8WVF1;Q8WVF1-2;Q8WVF1-3	Filtered	Filtered	Filtered
C9JFM0;P23471;P23471-2	Filtered	Filtered	44677.8
C9JGP9;E7ESZ7;O95299	1613143	1.46617e+06	1.57611e+06
C9JHX9;Q2TB10	Filtered	Filtered	Filtered
C9JI34;C9JSK7;E5RHG5;E7EW39;Q7Z2H8	Filtered	Filtered	Filtered
C9JIE4;O15061;O15061-2;O15061-3	Filtered	Filtered	Filtered
C9JIF9;P13798	115476	146775	189849
C9JIQ2;Q6IQ49;Q6IQ49-2	84976.2	29489.7	44147.9
C9JIZ8;O15119;O15119-2;O15119-3	Filtered	Filtered	Filtered
C9JJ19;P82930	2.28949e+06	1.71798e+06	1.96715e+06
C9JJ91;Q5T2R2;Q5T2R2-3	34556.1	27710	45479.7
C9JJN9;Q8N3P4;Q8N3P4-2;Q8N3P4-3	81275.1	74663.6	83869.2
C9JJV1;Q9Y5U2;Q9Y5U2-2	69181.8	45701.4	34776.7
C9JJX6;E9PDC3;O00192;O00192-2	51941.2	78999.2	80771.8
C9JK10;G5E9H1;P23229;P23229-2;P23229-3;P23229-4;P23229-5;P23229-6;P23229-9	66430.1	95441	61726.8
C9JKA9;H7BYN9;Q9NS87;Q9NS87-2;Q9NS87-4	Filtered	Filtered	18016.4
C9JKC4;Q969T7	33979	54036.9	117379
C9JKL2;C9JPX5;O95772	56343.1	48004.5	47128
C9JKU3;Q9P1Q0;Q9P1Q0-2;Q9P1Q0-4	30719.1	31335.9	17009.4
C9JKX0;F8VVB8;I1E4Y4;Q9Y4F3;Q9Y4F3-3;Q9Y4F3-4;Q9Y4F3-5	35630	39283.8	24267.7
C9JL12	38087.5	46344.4	60021.1
C9JL36;Q8WUT9;Q8WUT9-2	52044.7	44373.6	Filtered
C9JL75;Q12767;Q12767-2	108664	71145.9	87355.4
C9JLE3;P51654	16370.9	23809.5	82319
C9JLU1;P52434	135752	145733	133851
C9JLW8;I3L2L5;I3L4Q0	212424	227327	211634
C9JLX3;E7EM89;O60266	Filtered	23441.3	17015
C9JLZ0;O95104;O95104-2	48500.2	53578.2	29796.3
C9JMG9;E9PG60;H7C107;Q5JU85;Q5JU85-2;Q5JU85-3;Q6DN90;Q6DN90-2	17464.7	Filtered	14637
C9JMP5;C9JT95;F8WAF5;H7C0W4;Q96AH0;Q96AH0-2;Q96AH0-3;Q9BQ15	113345	93232	67595.7
C9JMZ0;D6R942;D6R9J8;D6RAH2;D6RB91;D6RC63;D6RCM6;D6RG14;D6RG21;D6RJA7;D6RJG6;F8W7V7;F8W966;H0YM62;Q02078;Q02078-2;Q02078-3;Q02078-4;Q02078-5;Q02078-6;Q05BX2;Q06413;Q06413-2;Q06413-3;Q06413-4;Q14814;Q14814-2;Q14814-3;Q14814-4;Q14814-5;Q14814-6;Q5T9U4	43778.9	23825.6	9384.04
C9JN85;Q13309	74747.6	68839.4	58866.7
C9JNE2;Q9Y530	77769.2	83369	78378.7
C9JNE5;P58340;P58340-2;P58340-3;P58340-4;Q2TLE3	Filtered	Filtered	Filtered
C9JNZ0;C9JRY4;Q96IW7	84836.8	102685	72279.3
C9JP00;Q9NR56	61074.2	48269.3	33420.1
C9JP52;Q92609	24186.4	30166.2	26335.6
C9JP84;E9PB45;F8VUW5;Q15038	20424.8	15429	14977.8
C9JP85;Q16656;Q16656-2;Q96AN2	109267	110920	Filtered
C9JPG0;Q12765	47014.1	50508.5	78548.3
C9JPL0;Q9UK58;Q9UK58-4	Filtered	Filtered	Filtered
C9JPP2;H7BXP1;Q9NYR9;Q9NYR9-2;Q9NYR9-3	79848.9	71951	79747.8
C9JQ25;Q0VFZ6	164007	184884	242992
C9JQ41;H7C525;Q4VC31	1.51204e+06	1.17704e+06	1.15792e+06
C9JQV6;E9PB63;E9PE62;E9PEE0;F5H096;F5H211;F5H4C0;F5H7N7;G3V3R7;G3V4U9;P54252;P54252-2	10466.7	19385.3	24563.8
C9JQW2;F8WE30;F8WF93;H7BZZ2;H7C0X4;Q92685	207257	57143.1	54068.8
C9JR56;Q3ZB87;Q9UPW6	48412.4	14328	Filtered
C9JR60;Q8IX18;Q8IX18-3	46022	47724.2	61300.9
C9JRD2;C9JXB9;P25686;P25686-2	Filtered	13493.1	Filtered
C9JRJ5;Q9UGP4	Filtered	Filtered	43574.6
C9JRS0;P42575;P42575-2	Filtered	11498.6	13258.8
C9JRZ6;Q9NX63	2152868	1.47835e+06	1.46296e+06
C9JS35;Q92890;Q92890-1	460560	453226	429665
C9JS86	2.34067e+06	1723596	1.79137e+06
C9JSC3;H7C2K2;Q9NZQ3;Q9NZQ3-2;Q9NZQ3-3;Q9NZQ3-4;Q9NZQ3-5	22186.9	21527.9	16337.2
C9JSZ2;Q96NT5;Q96NT5-2	14930.2	16842.1	18389.3
C9JTE9;G5E9L4;H7C5E2;Q9UHQ4	7111.71	7524.28	11446.4
C9JU26;F5H4H2;P56134;P56134-2	15561.4	13337.8	15074.1
C9JU51;Q93063;Q93063-2	32927.8	11410.6	21229.3
C9JUF4;O43768;O43768-3;O43768-5;O43768-7	145318	209261	166623
C9JUT4;Q93052	13088.2	20964.3	29799.7
C9JUU1;F5H6I7;Q6DD88	Filtered	Filtered	4140.74
C9JV30;E7EQS0;P20839;P20839-3	129678	129650	150486
C9JV86;F8VV56;F8VWK8;F8VZE2;F8W022;P08962;Q8N6Z9	22846.7	10820.3	23218.9
C9JVM4;E5RHU8;E5RIL0;E5RJS9;E9PHP8;H0YBC1;O95214	Filtered	Filtered	Filtered
C9JVN5;E9PD49;F8WAA2;Q9Y6N7;Q9Y6N7-2;Q9Y6N7-3;Q9Y6N7-4;Q9Y6N7-5	64963.7	42621.8	45280.4
C9JW63;Q9BSB7;Q9Y2D2;Q9Y2D2-2	30096	17370.3	9392.26
C9JWD3;Q9BQE9	25704.5	Filtered	Filtered
C9JWJ8;F8W8H9;Q14938;Q14938-2;Q14938-3;Q14938-5	40027.3	24678.6	35476.8
C9JWM7;P59998	174415	236683	262762
C9JWR9;E9PER6;O15530;O15530-3	18671.4	12464.6	16123
C9JWV4;H7C0G7;Q9H9Q4;Q9H9Q4-2	27946.6	21054.1	28235.8
C9JX01;Q9UM00;Q9UM00-2	164430	151726	282992
C9JX46;O95905	8506.41	18519.4	20328.6
C9JXA2;P29320	32674.1	36831.3	35519.9
C9JY04;Q9BU79	42651.5	39553.5	45960.2
C9JYJ4;Q8IUH4	89661	69700.8	223194
C9JYM0;O75817	52412.8	50982.9	58947.6
C9JYQ9;H0Y8C2;Q6P5R6	45333.2	44036.6	53139.2
C9JYS5;Q96ET8-3;Q9NYZ1	35150.5	24493.9	78520.4
C9JYY6;E9PDA4;F5GYD3;F8W774;F8W775;Q92823;Q92823-2;Q92823-3;Q92823-4;Q92823-5	58514.9	45239	48126.9
C9JZI4;Q9NP80	42224.8	32784.5	35958.3
C9JZR4;E9PB03;Q9NP61	13696	14488.8	27487.3
C9K005;Q9H330;Q9H330-2;Q9H330-4	40786.6	39964.5	63869.2
C9K0X5;H3BQR0;H3BRI5;H3BSK1;H3BTA6;O95149	Filtered	Filtered	8662.45
D3DNV8;Q8IVL5	9366.42	Filtered	Filtered
D3DU85;Q15599;Q15599-2	50583	48388.7	48928.3
D3YTA9;F6U1T9;P63098	Filtered	Filtered	Filtered
D3YTB5;P51617;P51617-2;P51617-3	17823.2	43419.1	35608.1
D6R933;D6R980;D6R9F6;D6RGD0;D6RIZ3	Filtered	110617	47877.3
D6R938;E9PBG7;E9PF82;Q13557;Q13557-10;Q13557-11;Q13557-6;Q13557-8	397284	402511	330783
D6R9E3;D6RCT6;D6RIA0;Q9BWT6	40879.3	27156.9	Filtered
D6R9L8;D6RD98;D6RDG6;Q6ZTZ1	Filtered	Filtered	Filtered
D6R9M8;D6RAE5;Q5Q9G5;Q5Q9G7;Q5Q9G8;Q9UBT6;Q9UBT6-2;Q9UBT6-4	49689	51334.5	74750.3
D6R9Q4;D6RAY6;Q96MT8;Q96MT8-2;Q96MT8-3;Q96MT8-4	1878.02	35413.7	40274.2
D6R9Q7;E7ESU6;Q8NBW4;Q8NBW4-2	70800.8	77121.7	88058.5
D6R9S7;D6RDB0;D6RDM3;D6RHE3;E7ENY4;E7ES98;Q96GZ6;Q96GZ6-2;Q96GZ6-5;Q96GZ6-6;Q96GZ6-7;Q96GZ6-8	Filtered	Filtered	2886.78
D6R9S8;D6RA76;D6RAZ7;D6RC11;D6RCE6;D6RCR8;D6RD48;D6RDI6;D6RDP6;D6RDY1;D6RFX6;D6RHI6;D6RHU6;D6RIU2;H0Y8T9;Q9NY35;Q9NY35-2	Filtered	31934.7	37636.5
D6R9W2;H9KV97;Q8NEC7	Filtered	Filtered	2650.14
D6RA47;D6RE79;D6RIZ4;Q14728	Filtered	Filtered	Filtered
D6RAD4;P50613	84132.1	63093.9	Filtered
D6RAK8;D6RBJ7;D6RF35;P02774;P02774-2	135982	Filtered	82403.6
D6RAU4;Q9H8E8	Filtered	Filtered	Filtered
D6RB01;Q9Y6X4	Filtered	17950.1	18222
D6RB59;Q6P2E8	200280	183850	178086
D6RB81;F8W9N1;Q9UHK6	11590.2	11088.6	11987.8
D6RBB0;O60683	30204.9	9839.64	56520
D6RBB5;Q99735	403416	247884	324953
D6RBI1;D6RFY6;D6RJ86;H0Y8S5;Q96H20;Q96H20-2	35179.7	48695.8	50780.9
D6RBN9;Q8IUW5	Filtered	Filtered	16349.3
D6RBR7;Q9Y3S2	Filtered	Filtered	Filtered
D6RBS5;Q8IZ81	128274	104707	167962
D6RBW1;P06730;P06730-2;P06730-3	185320	284866	304762
D6RC10	143548	133866	265322
D6RC82;D6RFZ2;Q0IIM8;Q0IIM8-2;Q0IIM8-3	Filtered	Filtered	Filtered
D6RCD0;Q8NBQ5	78903.6	50296.7	57267.8
D6RD20;D6RJC2;G3V1P6;P30307;P30307-2	Filtered	Filtered	Filtered
D6RD25;Q9Y255	Filtered	Filtered	Filtered
D6RDI3;H0Y8R4;H0Y919;Q9BVS4	Filtered	Filtered	Filtered
D6RDY7;Q9UJT9	Filtered	57485.3	Filtered
D6REA1;Q9H173	Filtered	28222.9	38825.1
D6REA6;F6TF62;F6VM53;H3BMF3;H3BNB2;H3BNT3;H3BQ55;H3BRT2;H3BS73;Q96S19;Q96S19-2;Q96S19-3	Filtered	19290.7	Filtered
D6REB5;P35475	Filtered	Filtered	14056.6
D6REN6;P12081	116302	163776	176027
D6REQ6	30546.6	23254.6	Filtered
D6RER5;D6RGI3;Q9NVA2;Q9NVA2-2	224823	223865	228923
D6REX7;D6RHD2;O43609	Filtered	Filtered	Filtered
D6RF48;Q9P2W9	63778.8	59619	94934.9
D6RFI3;D6RGI4;E7EQR8;Q9GZM5	76922.4	78365	66936.6
D6RFI4;Q99697;Q99697-2;Q99697-3	Filtered	Filtered	Filtered
D6RG18;D6RHI7;P51946	10714.7	12474	4182.39
D6RGG3;Q99715;Q99715-4	17938.9	Filtered	Filtered
D6RGK9;H0Y9C1;H0Y9Z5;Q96LI5;Q9ULM6	136275	156003	118155
D6RGV5;D6RIE3;P14406	5.67648e+06	5268830	4863447
D6RHE1	96397.7	80052.4	98260.7
D6RHG7;H7BXS5;Q86VE9;Q86VE9-2;Q86VE9-3;Q86VE9-4	93715.5	18918.4	Filtered
D6RHI9	808186	793157	942982
D6RI04;Q53HV7	Filtered	Filtered	Filtered
D6RIA1;E9PH99;Q9Y4E5;Q9Y4E5-2	Filtered	Filtered	Filtered
D6RIW7	Filtered	Filtered	Filtered
D6RJ90;Q9Y6G5	39973.6	29346.4	25777
D6RJG9;Q9Y5W7;Q9Y5W7-2;Q9Y5W7-3;Q9Y5W7-4	12637.8	17575.9	Filtered
D7UEQ6;H7BXT2;Q9BSW2;Q9BSW2-2	Filtered	Filtered	13779.2
D7UEQ7;D9N155;F8W7N8;H0Y8B3;Q96HN2;Q96HN2-2;Q96HN2-3	50810.4	52709.3	53736.8
E0CX11	28449	28546.4	13030.4
E1B6X0;P43007	105365	96727.7	107308
E2QC23;O75600	106527	103760	85512.4
E2QRD4;Q6ZRQ5	28804.1	26096	Filtered
E2QRD5	13583.2	Filtered	Filtered
E2QRF9;O75496	24413.4	Filtered	11229.9
E2QRH7;F6SH78;Q5TGH5;Q9NYP7	68192.1	72292.4	124359
E3W978;F8WCW5;O75330;O75330-2;O75330-3;O75330-4	10047	10943.9	Filtered
E5KQS6;E9PK26;E9PMW6;Q9NRS6;Q9NRS6-2	29025.8	28975	31368.7
E5RFG5;E5RFT3;E5RGA0;E5RGW5;E5RIW0;E5RJH2;G3V105;O14920;O14920-3	16063.3	Filtered	Filtered
E5RFJ1;Q96MF7	60767.9	52243	Filtered
E5RFY4;E5RGP2;E5RIV2;G3V140;G5E992;Q5T6A0;Q8IYX8	45586.8	20875.6	47751.7
E5RG17;Q6P1N9	100085	109401	126932
E5RGN3;E5RIM7;O00244	53361.8	55510.2	64203.2
E5RGS2;E5RJV5;Q9H6H4	172794	98865.9	134055
E5RGT2;Q96MH6;Q96MH6-2	49273.9	32687	56099.6
E5RGZ2;H0YC02;H0YKJ1;Q6NT76;Q6NT76-2;Q6NT76-3;Q6NT76-5	37016	Filtered	Filtered
E5RH35;E5RJA8;E5RJP8;E5RJZ7;Q9Y646	Filtered	Filtered	Filtered
E5RHG8;Q15369	224675	241604	253089
E5RI87;Q86XS8	Filtered	Filtered	Filtered
E5RIA9;E5RJK1;H0YAN3;Q9UJ68;Q9UJ68-2;Q9UJ68-3;Q9UJ68-4;Q9UJ68-5	54256.8	43872	41749.6
E5RIE8;O43513	48597.8	Filtered	Filtered
E5RIH5;E5RIZ0;Q6NXR4	Filtered	17359	21547.6
E5RIQ5;Q9BX73;Q9BX73-2	Filtered	Filtered	10343.2
E5RIW6;F5H8H8;Q5SVS4	36693.7	30309.4	77047.7
E5RJ26;P49810;P49810-3	21480.8	20074.7	18782.5
E5RJ52;P53677	41551.6	37037.8	82918
E5RJ68;O00203	71528.9	83434.4	130839
E5RJ99;Q8TCF1	Filtered	30142.9	38185.9
E5RJD8;O75347	458604	656588	905671
E5RJF8;E5RK82;O15182	70356.4	62456.2	55076.1
E5RJN7;E7EPX0;E7ER74;E7EVJ4;E9PEI3;E9PF26;E9PF50;E9PH62;F8VPI7;G5EA18;Q9NUL3;Q9NUL3-2;Q9NUL3-3;Q9NUL3-4	93471	88959.7	82891.8
E5RJR5;P63208	455709	455828	538807
E5RJS5;Q15390	84385.1	74549.1	56662.7
E7EM48;P33991	278358	296870	220254
E7EM60;P51398;P51398-2	502814	467228	447791
E7EM64;Q7L5N1	Filtered	44167.8	51777.8
E7EM77;H0Y861;H0Y870;Q5SSC2;Q9H0R3	7664.5	8859.23	14871.6
E7EM99	Filtered	17079.1	12801.9
E7EMB1;Q9UH65	3333.66	8084.37	5141.65
E7EMB3;E7ETZ0;H0Y7A7;P62158	507078	1.04044e+06	1.13129e+06
E7EMC3;E9PBC1;E9PBC2;F6PQP6;O95208;O95208-2	36958.6	25040.7	24166.7
E7EMF1;E7ESP4	99883.1	92892.1	96643.7
E7EMN6;P41236	67787.3	101730	131905
E7EMP9;H0Y2N2;Q9NRR4;Q9NRR4-2	12991.1	13669.5	7367.32
E7EMR3;E7EN28;E7ENK1;E7ES20;E7ESV6;E7ETE3;E7EUP0;E7EUW2;E7EVD6;E7EW95;E7EX52;E9PBG4;E9PCJ6;E9PE04;H0Y9K5;Q9HAR2;Q9HAR2-2	70576.1	70519.1	66486.5
E7EMS2;G3V3D1;G3V3E8;P61916	180813	191140	227573
E7EMT1;E9PE96;Q9Y6V0;Q9Y6V0-2;Q9Y6V0-5;Q9Y6V0-6	437176	521832	751454
E7EMX7;E9PED3;Q9P0K7;Q9P0K7-2;Q9P0K7-3	83476	80215.6	69912.6
E7EN32;O00255;O00255-2	7306.42	19334.3	Filtered
E7EN46;Q8TB03;Q8TB03-3	Filtered	Filtered	Filtered
E7EN60;E7EPS3;Q9H2P9;Q9H2P9-2;Q9H2P9-3;Q9H2P9-4;Q9H2P9-5	22006.9	45084.6	57113.3
E7EN63;E9PBF2;Q9UBC3;Q9UBC3-2;Q9UBC3-3;Q9UBC3-6	141318	101383	14331.9
E7EN73;Q8IZA0;Q8IZA0-2	50624.1	60196.2	65293.6
E7EN96;E9PGW7;Q15528;Q15528-2;Q5T8T7;Q5T8T8	11824.7	9422.54	7475.73
E7END2;E9PHV5;P28290;P28290-2;P28290-3	51512.5	43281.9	41963.6
E7END7	211782	195378	227468
E7ENF1;F5H7W8;Q96C57	55071.9	18426.9	28956.1
E7ENH9;P53396	422826	614125	658383
E7ENI0;F5H7K2;Q8IWI9	1346.41	Filtered	Filtered
E7ENN3;E7EQI5;E9PEL9;Q8NF91;Q8NF91-2;Q8NF91-4;Q8NF91-8	4885475	4.07003e+06	3.65946e+06
E7ENR5;H0Y714;Q96G21	149691	141222	108930
E7ENU4;P55265;P55265-4	248864	154334	59278.9
E7EP00;P53992	119268	129692	126803
E7EP23;E9PCX0;Q6IA86;Q6IA86-3	61892.7	51412.7	34711.5
E7EP65;E7EW77;Q9NYB9;Q9NYB9-2;Q9NYB9-4	198528	195489	281218
E7EP74	119362	123583	116705
E7EP77;E7EQX0;E7ESC9;H0YAG1;Q8IZU2	Filtered	7260.94	6371.04
E7EP97;H3BR29;H3BSM7;Q96GQ5	Filtered	108298	71264.1
E7EPA5;P10643	Filtered	Filtered	Filtered
E7EPA7;P29401	225785	515340	645440
E7EPC6;P16070;P16070-10;P16070-11;P16070-12;P16070-13;P16070-14;P16070-16;P16070-17;P16070-18;P16070-3;P16070-4;P16070-5;P16070-6;P16070-7;P16070-8	1.22246e+06	1102928	1.33546e+06
E7EPC9;E7EX17;P23588	230922	298417	254443
E7EPD1;P08572	249646	230030	241954
E7EPD8;G3V2F4;Q86TV8;Q9NUW8	76404.2	46028.7	56812.1
E7EPH0;F8W7B9;O60512	Filtered	24388.8	Filtered
E7EPI0;Q9P2D0	29246.1	33907.1	35106.6
E7EPK6;E7ETK0;P62847;P62847-2;P62847-3	1.91313e+06	2.62668e+06	3.05288e+06
E7EPL3;Q7Z401	30798.8	25150.5	21784.7
E7EPL4;H3BNZ1;Q6P996	Filtered	11057.5	22104.9
E7EPN9;Q9Y520;Q9Y520-4;Q9Y520-5;Q9Y520-7	238164	315810	144372
E7EPP7;Q6ZWJ1	23873.4	33742.5	30281.4
E7EPT4;P19404	1.38602e+06	1.0786e+06	1.09105e+06
E7EPV7;P37840;P37840-2	15426.7	16475.6	19779.2
E7EPX7;E7EVP7;G5E9P1;Q14643;Q14643-2;Q14643-3;Q14643-4;Q14643-5;Q14643-6;Q14643-7;Q14643-8	145267	88459	138629
E7EPZ3;O60784	61616.3	69752.7	87258.8
E7EPZ8;H3BNF5;H3BPV6;H3BSB6;H3BUA4;H3BUR2	22874.6	29331.8	40292.5
E7EQ34;O14653;O14653-2	47813.4	44545.4	41079.6
E7EQ45;Q9H0R1	37971.1	22358.7	28945.9
E7EQ64;P07477	24174.6	32817.5	955905
E7EQ67;F8W8D6;H7BY63;Q8NB25;Q8NB25-2;Q8NB25-3	113591	35100.7	37674.7
E7EQ69;Q9GZZ1	150103	189507	256055
E7EQ81;F6UBB5;Q7Z412	10432.1	13740.4	Filtered
E7EQC1;P22570	1.59737e+06	1.28049e+06	1.31064e+06
E7EQD5;F5GXG3;Q15833;Q15833-2	50463.1	46065.7	52576.5
E7EQJ0	Filtered	Filtered	Filtered
E7EQN6;Q9GZR1;Q9GZR1-2	18817.1	27542.9	7803.22
E7EQT4	204652	120560	51203.9
E7EQU1;E7ES08;O15347	707319	663403	632497
E7EQW9;E9PCR8;Q96RT1;Q96RT1-2;Q96RT1-3;Q96RT1-4;Q96RT1-5;Q96RT1-6	104327	126846	111368
E7EQY4;E7EV10;F8W8M8;Q9BTC8;Q9BTC8-2	24304.2	18550	Filtered
E7EQZ4;Q16637;Q16637-3	308042	267777	347743
E7ER53;E7EVZ1;G3V138;Q86UP3;Q86UP3-2;Q86UP3-4	Filtered	Filtered	Filtered
E7ER66;O94986	28231.4	27401.1	25363.5
E7ER89;H0Y373;O95340;O95340-2	Filtered	5658.73	Filtered
E7ER97;F5GXH4;O95671;O95671-2	8482.98	24908.1	29353.6
E7ERH6;Q9UBN7	Filtered	19597.1	11228.2
E7ERJ4;E7EWI9;P51991-2	1.95203e+06	1.29129e+06	538152
E7ERK9;Q9UI10	110246	128073	130874
E7ERS3;Q86VM9	21060.4	17289.7	Filtered
E7ERU2;E9PEB9;F8W9J4;Q03001	22476.3	23393.4	49241.9
E7ERZ2;F8WDS5;F8WDV1;Q9Y535;Q9Y535-2	Filtered	5988.41	50567.1
E7ES19;P35443	Filtered	35341.2	28666.9
E7ES32	Filtered	Filtered	Filtered
E7ES43;O95757	127217	165612	171177
E7ES96;P49768;P49768-2	28283.5	30812	48313
E7ESA6;H0YBP1;Q05397;Q05397-5;Q8IYN9	31010.9	33321.6	30789.6
E7ESC0;H3BRP3;Q9UBI4;Q9UBI4-2	193157	131432	28138
E7ESC6;E9PEN8;Q9UIA9	65048.4	67715.6	67205.2
E7ESD5;E9PLN6;F2Z2Y1;O95677;O95677-2;O95677-4;O95677-5	19055.7	19766.6	Filtered
E7ESG3;Q96I15	149386	189833	159380
E7ESG6;F5H0B5;Q92504	45035.4	58430.6	38471.5
E7ESJ0;Q92743	Filtered	Filtered	Filtered
E7ESJ3;Q9UPS8;Q9UPS8-3	56293.6	22752.8	22223.2
E7ESK6;E9PBI9;F5H0S6;P34741	38946.2	43274.4	48100
E7ESL0;Q9NWU5	127002	177465	178247
E7ESM6;Q7KZF4	3.49266e+06	3.61576e+06	3544026
E7ESS3;Q71RG4;Q71RG4-2;Q71RG4-3	Filtered	Filtered	Filtered
E7EST0;F6YA60;H0YFM4;Q969R8	25300.8	59871.3	42972.4
E7ESU5;P02768	4.0628e+06	5137689	7275589
E7ESZ5;Q9BV35;Q9BV35-2;Q9BV35-3;Q9BV35-4	Filtered	Filtered	Filtered
E7ET15	17222.5	14148.3	3720.55
E7ET21;Q9NVC6	39413.7	41973.3	16112.5
E7ET38;F8VQP3;O95628-4;O95628-8	Filtered	Filtered	Filtered
E7ET49;Q8NCG7;Q8NCG7-2;Q8NCG7-4	96883.8	87777.3	101258
E7ET55;F5H748;P35670;P35670-2;P35670-4	69206	55944.1	54970.1
E7ETA6	181975	160162	131996
E7ETB3;Q9ULA0	17631	36329.6	39346
E7ETE0	9292.82	26010.5	21885.4
E7ETP2;Q96GG9	45179.8	43080.5	45907.9
E7ETP9;Q9UQV4	Filtered	Filtered	Filtered
E7ETR5;H3BSM0;Q53FZ2	Filtered	25483.9	29184.9
E7ETS7;Q12959;Q12959-3;Q12959-5;Q12959-6;Q12959-7	54288.4	54845.8	55751.2
E7ETU7;H0Y9G6;P09001	571879	553023	576879
E7ETX0;Q8NHX9	Filtered	Filtered	5604.17
E7ETY2;Q13428-7	394355	325094	211527
E7ETY3;Q8IWA5;Q8IWA5-2;Q8IWA5-3	Filtered	Filtered	Filtered
E7ETY4;E9PC69;Q7KZI7;Q7KZI7-10;Q7KZI7-11;Q7KZI7-12;Q7KZI7-13;Q7KZI7-14;Q7KZI7-15;Q7KZI7-16;Q7KZI7-2;Q7KZI7-3;Q7KZI7-4;Q7KZI7-5;Q7KZI7-6;Q7KZI7-7;Q7KZI7-8;Q7KZI7-9	49835.5	52895	52692.6
E7ETY7;Q8TED1	52441.5	56944.5	74166.4
E7ETZ3;Q9BVC6	586149	538947	803521
E7ETZ4;Q9Y6E2	209618	249696	242855
E7EU09;P11362;P11362-14;P11362-19;P11362-2;P11362-20;P11362-21;P11362-3;P11362-4;P11362-5;P11362-6;P11362-7	Filtered	5561.41	6979.04
E7EU13;Q96P48;Q96P48-1;Q96P48-2;Q96P48-3;Q96P48-4;Q96P48-5;Q96P48-7	16716.8	13094	10405.7
E7EU23;P50395	392318	585508	784582
E7EU28;Q86U06;Q86U06-2;Q86U06-3;Q86U06-4;Q86U06-5	28261.5	25669.4	18306.1
E7EU54	56649.3	48100.6	70778.3
E7EU78;Q9Y6K9;Q9Y6K9-2	16830.8	11656.7	16019
E7EU81	26144.5	Filtered	Filtered
E7EU96;P68400;Q5U5J2	387933	375382	281073
E7EUC3;O43657	18923	22056.7	33790.5
E7EUC7;Q16851;Q16851-2	137154	84690.4	98047.6
E7EUE1;P28288	433585	431725	543699
E7EUG5;H7C5V1;Q9BTF0;Q9BTF0-2	Filtered	Filtered	Filtered
E7EUH9;H0Y6U5;Q86XI2;Q86XI2-2	23350.7	33201.8	33882.2
E7EUJ4;Q504U3	Filtered	14802.5	Filtered
E7EUL4;H7C3D5;Q8NC44	Filtered	19465.2	Filtered
E7EUN2;Q9UPQ3;Q9UPQ3-2	42084.2	40848.9	35719.9
E7EUN9;Q9NX74	56108.3	62069.9	71578.5
E7EUS2;Q8TBZ0;Q8TBZ0-2	17792.4	15205.5	12739.5
E7EUT4	4250644	5.9775e+06	7.85705e+06
E7EUU4	524275	626608	643301
E7EUY8;Q8TBZ3;Q8TBZ3-2	64622.6	47308	32461.3
E7EV41;F5GZV3;F5H5B3;F6VPY9;P32418;P32418-2;P32418-3;P32418-4	Filtered	Filtered	Filtered
E7EV80;E7EX01;Q14168;Q14168-2;Q14168-3	158319	162488	153827
E7EVA0	596136	550319	437272
E7EVC7;Q676U5;Q676U5-2;Q676U5-3	Filtered	11244.3	11180.3
E7EVF4;E7EVJ5;Q96F07-2	32577.5	23548.7	25778.1
E7EVF6;Q9Y4P8;Q9Y4P8-2;Q9Y4P8-3;Q9Y4P8-4;Q9Y4P8-5;Q9Y4P8-6	8932.23	32210.2	30966.4
E7EVG1;Q8TAD8	Filtered	180933	391455
E7EVH7	48107.2	50394.2	64048.5
E7EVH9;E9PAV8;F5H6B0;Q08623;Q08623-3	59961.2	86822.6	133903
E7EVR7;H7BXU9;P21802;P21802-10;P21802-11;P21802-12;P21802-13;P21802-15;P21802-16;P21802-17;P21802-18;P21802-2;P21802-20;P21802-21;P21802-22;P21802-23;P21802-3;P21802-4;P21802-5;P21802-6;P21802-7;P21802-8;P21802-9	26200.5	9486.28	13443.9
E7EW05;Q9NVU7	37007.4	44269.2	60028.1
E7EW18;P06746	30469.2	23227.1	14871.8
E7EW20;Q9UM54-6	62913.8	69198.5	85247.7
E7EW67;Q6PII3	Filtered	Filtered	Filtered
E7EW84;E9PHI3;F2Z2Q3;Q8TAG9	56175	55724.6	66134.5
E7EW90;Q70EL1;Q70EL1-10;Q70EL1-7;Q70EL1-8;Q70EL1-9	24001.4	19414.2	324858
E7EW96;O14656	61275.6	66907.1	104106
E7EWC2;Q13576	17738.3	35737.8	92128.6
E7EWE9;Q8NBT2	44544.1	39704.1	41460.7
E7EWM1;Q15596	Filtered	Filtered	35870.5
E7EWN2;H0Y5J3;O15550	Filtered	Filtered	Filtered
E7EWQ8;O75093;O75093-2;Q5T0V0;Q5T0V2;Q5T0V3;Q5T0V4	Filtered	Filtered	50693.6
E7EWR0;Q13616	231406	61530.3	63618.5
E7EWT3	107631	86653.7	76367
E7EWW0;F5H7K1;G5E9I3;Q7Z3J2	36542.1	46561.4	45061.3
E7EWX6;E7EXB6;Q8IXJ6;Q8IXJ6-2;Q8IXJ6-3;Q8IXJ6-4	21194.6	18927.8	Filtered
E7EWZ6;P06756;P06756-2	122123	104870	114647
E7EWZ9;P60983	121857	163102	179348
E7EX51;Q96ST2;Q96ST2-2;Q96ST2-3	98571.9	72376.7	42329
E7EX90;E9PFS5;E9PGE1	25834.7	36025.8	39861.5
E9PAL6;Q86XN8;Q86XN8-2	3.65683e+06	3.70162e+06	4920575
E9PAL9	415215	339190	348243
E9PAM1;F5H0M7;H0YGN7;Q2M296;Q2M296-2	Filtered	27573.9	39489.6
E9PAT7;Q15013	14714.9	8833.08	Filtered
E9PAU2	191036	147364	93396
E9PAV3;F8VU71;F8VZJ2;H0YHX9;Q13765	623386	736792	949558
E9PAX8;F8W0Q9;Q8NEY8-2;Q8NEY8-8	137263	73326.9	29251.1
E9PAZ2;Q96HR8	89794.1	77840.7	47105.8
E9PB02;P78346	253159	61894.3	55328.7
E9PB12;Q96RT8	26307.2	31275.6	21593.4
E9PB30;Q4KMQ2;Q4KMQ2-2	122614	115963	127107
E9PB61	427143	233090	206913
E9PBB0;Q6Y7W6	320237	306481	208292
E9PBB3;P40855;P40855-5;Q5QNY5	40462.5	44513.1	20407.9
E9PBD4;H0Y368;O60762;Q5QPK2	326557	282157	340744
E9PBJ6;Q12772	9966.48	Filtered	21621.7
E9PBL7;Q14393;Q14393-2;Q14393-3;Q14393-4	Filtered	57258.4	32071.9
E9PBL8;Q8WTW3	22171.9	18999.6	22940.5
E9PBP2;P09668	39151.6	43181.6	47739.3
E9PBQ3;Q8N511	101562	86601.6	66355.2
E9PBQ9	17168.3	Filtered	46373.5
E9PBR4;Q96NL0;Q96NL0-2;Q96NL0-3;Q96NL0-4	Filtered	Filtered	Filtered
E9PBR6;Q5SNT2;Q5SNT2-2	56364.8	37987.2	118504
E9PBR7;H2N333;H3BT57;P29590;P29590-10;P29590-11;P29590-12;P29590-13;P29590-14;P29590-2;P29590-3;P29590-4;P29590-5;P29590-8;P29590-9	14493.5	25419.5	14828.5
E9PBS3;H0Y442;Q6ZS17;Q6ZS17-2;Q6ZS17-3	601.107	1253.24	4015.28
E9PBV3	5777.79	5882.37	5102.16
E9PBV5;Q96FV2	24195.5	88544.8	40243.6
E9PBY3	4352.74	4099.81	5869.56
E9PBZ4;Q6P4H8	42619.2	Filtered	Filtered
E9PC49;Q96EB6	Filtered	Filtered	Filtered
E9PC62;O95319;O95319-2;O95319-3;O95319-4;O95319-5;Q5VZZ6	15623.3	27719.9	25239
E9PC67	652.31	Filtered	1290.64
E9PC74;Q13144	191172	195869	187022
E9PC87;O94876	13869	Filtered	Filtered
E9PC97;Q8IWS0	279008	263953	149326
E9PCA6;Q9P2E7	13049.5	12792.3	11199.8
E9PCH4	Filtered	Filtered	Filtered
E9PCI3;P08243	156383	201407	202162
E9PCI9;P14324	141571	204257	263817
E9PCK7;Q5JTH9;Q5JTH9-2	79575.5	80204.3	68371
E9PCL5;E9PCV2;F5GXA2;F5GXV6;F5H7Z0;F8WA69;P56945;P56945-2	Filtered	Filtered	4915.19
E9PCM7;F5H2R1;F5H4I8;F5H838;F5H8J0;G3V1R3;P37275;Q2KJ05;Q5VZ84	Filtered	Filtered	Filtered
E9PCR4;Q9UJX5	72397	49812.8	25512.8
E9PCW1;O95249	65976.7	62149.6	56580.5
E9PD27;Q8TCZ2;Q8TCZ2-2;Q8TCZ2-3;Q8TCZ2-5	54802.6	53602.1	63083.1
E9PD44;H0YH69;Q9HBU6	198934	118456	96217.5
E9PD50;E9PEH2;Q92540;Q92540-2;Q92540-4	101833	75757.7	38697.3
E9PD64	43339.7	64793.1	78247.1
E9PD83;F5GZ53;Q13009	Filtered	Filtered	2870.6
E9PDB5;Q8N2G8	59350.8	53377.7	80176.3
E9PDC5;F8W846;F8W9T5;G8JL96;Q13332;Q13332-2;Q13332-3;Q13332-4;Q13332-6	14968.4	14313	15208.1
E9PDF6;O43795;O43795-2	156462	157208	170798
E9PDH4;Q9Y2I7	Filtered	Filtered	Filtered
E9PDM9;F5H170;Q8WW22;Q8WW22-2	152232	178889	149234
E9PDN5;F5GZT3;F5H6K1;H0YFQ3;P11532;P11532-4	51669.5	116036	56711.4
E9PDP9;Q8WV44	21739.8	13766.1	20957.7
E9PDR0;P05166	250494	223221	231386
E9PDV0;P32929	47870.1	92011.4	90305.6
E9PDW0;Q9ULJ7	14822.7	25651.5	10727.3
E9PDY5;Q96MM7;Q96MM7-2;Q96MM7-3	3591.44	19828.8	25245.6
E9PE68;Q9BZF1;Q9BZF1-2	190506	174912	341087
E9PE75;O43933;Q96S70	Filtered	Filtered	Filtered
E9PEC0;Q16186	127905	202872	184185
E9PEH8;F5H5C1;Q9Y4J8-2	69268.9	75518.8	77015.5
E9PEI0;Q69YH5	70463.8	Filtered	Filtered
E9PEJ6;P98196	57269.6	54539.7	63548.8
E9PEP6;O14786	29627.4	27891	35030.2
E9PER1;Q14689	61731.1	37605	45286.2
E9PES4;F5H1C2;Q9Y496	33043.2	Filtered	25565.9
E9PET8;O60282	488095	261797	701187
E9PEZ3;H9KV28;O60610	55579.8	74985.8	120945
E9PF17;P13611;P13611-2;P13611-3;P13611-4;P13611-5	129904	103939	113386
E9PF19;Q9Y4P3	220304	203906	375629
E9PF74;Q9HC21	541784	367368	480127
E9PFA8;H0Y5K5;H7BXI5;Q9Y282;Q9Y282-3	71654.5	58392.1	67559
E9PFA9;Q86Y07;Q86Y07-2;Q86Y07-3;Q86Y07-4;Q86Y07-5	14327.8	15266.9	95935.5
E9PFM7;Q8IXQ6;Q8IXQ6-2	Filtered	17815.9	Filtered
E9PFP2;O43719	79410	59208.9	40411.2
E9PFR0	22862.5	21426.8	21125.6
E9PFR3;Q14738;Q14738-2	60954.6	87310.1	101979
E9PFU1	315106	379729	527473
E9PFY5;F8W9I4	62421.1	69192.5	48250
E9PFZ1;Q5JPI3;Q5JPI3-2	Filtered	Filtered	2359.81
E9PFZ5;Q13308	576111	519276	568586
E9PFZ9;Q6SZW1;Q6SZW1-2	21165.5	21486.7	19033.6
E9PG19;O94868;O94868-2	12793.4	Filtered	Filtered
E9PG22;Q8IW35;Q8IW35-2	49669.4	47859.8	44082.8
E9PG71;P54764	Filtered	75033.9	Filtered
E9PG73;Q13427	216267	142474	93937.5
E9PG89;Q12873;Q12873-2	44887.9	1919.35	12196.1
E9PGD0;F5GXJ4;H0Y860;H7C5A5;Q9P246	Filtered	Filtered	11236.5
E9PGG4	Filtered	Filtered	Filtered
E9PGI2;H0YKJ9;O60637;O60637-2;O60637-3	1.36551e+06	664616	1.70902e+06
E9PGL0;F5GXA0;F5GXF1;Q8NBK3;Q8NBK3-2;Q8NBK3-3	28915.4	21616.2	24999.3
E9PGM9;P78332	101344	53914.7	194174
E9PGP2;P03951;P03951-2	405303	236941	319561
E9PGQ0;Q96H78	Filtered	Filtered	Filtered
E9PGR1;Q9Y251	35496.1	36629.6	49999.4
E9PGT1;Q15631	26601.8	37710.9	51191.3
E9PGT3;E9PRI4;Q15418;Q15418-2	113047	51033.1	70747.3
E9PGT6;Q99627	114490	136883	146623
E9PGZ0;G5E9Q2;O75534;O75534-2	181702	212212	221684
E9PH08;H3BP77;O00142;O00142-2	34077.5	25182.3	21167.1
E9PH29;P30048	18589300	16958356	17221762
E9PH43;Q14376;Q5QPP4;Q5QPP9	Filtered	Filtered	29247.6
E9PHA2;Q15003	63632.2	68938.4	76509.2
E9PHH9;Q9BUI4	10422.8	13891.9	13244.4
E9PHI5;P51674	Filtered	Filtered	Filtered
E9PHK9;Q13428;Q13428-4	90584.5	55598.7	56217.5
E9PHQ3;F5GZL3;Q9HAU0;Q9HAU0-2;Q9HAU0-4;Q9HAU0-5	74446	58761.8	36996.7
E9PHR3;F5H1V8;G5E9I6;Q15555	8931.14	22699.5	22739.6
E9PHX2;H0YIY6	11603	Filtered	1687.05
E9PHX7;F5GYJ2;P52594;P52594-2;P52594-3	64689.1	84493.9	70690.2
E9PHY5	66495.9	24256.3	28081.3
E9PI08;E9PKA7;Q9Y256	Filtered	Filtered	Filtered
E9PI34;Q9UPV0;Q9UPV0-2	40522.3	52234.7	6563.16
E9PI87;Q9BUP3;Q9BUP3-3	59147.1	45765.3	44870.6
E9PI88;O60547	403842	369064	412544
E9PIC0;O14521	226044	189981	181195
E9PIE4	116405	104237	108512
E9PIK4;E9PIN5;E9PKN9;E9PKZ4;E9PMW4;E9PMY0;E9PN66;E9PNB3;E9PPM1;E9PQ46;E9PS55;O14683	37640.9	21607.1	40846.9
E9PIT3;P00734	34192	44505.2	24900.1
E9PJ24;F8WEF5;Q9P1Y6;Q9P1Y6-2;Q9P1Y6-3	63484	35098	Filtered
E9PJ42;E9PP29;Q5BJD5;Q5BJD5-2	70010.3	57038.7	68100.8
E9PJ64;F8WAP3;Q5VU43;Q5VU43-3;Q5VU43-4	23553	21989.3	Filtered
E9PJB8;E9PN30;Q6GYA4;Q9BQE4	Filtered	Filtered	Filtered
E9PJE5;E9PNH3;G3V151;Q17R31;Q17R31-2	28597.6	Filtered	20117.6
E9PK25;G3V1A4;P23528	3.2621e+06	4668477	6261619
E9PK59;E9PS17;Q96KG9;Q96KG9-2;Q96KG9-3;Q96KG9-4	43800.3	49639.8	56256.6
E9PK91;Q9NYF8-3	21542.9	10198.9	Filtered
E9PK95;F8VNP5;F8VZR5;P28702;Q5STQ1	Filtered	Filtered	Filtered
E9PKA8;E9PLE3;E9PQL5;E9PSC8;Q6ZUT1;Q6ZUT1-2;Q6ZUT1-3	Filtered	Filtered	Filtered
E9PKB9;Q92543	17588.9	12940.3	12836.4
E9PKD1	258827	191362	216257
E9PKE4;F5GXA8;Q9HAB3	Filtered	Filtered	Filtered
E9PKF6;G8JLI3;H7BXH2;Q5H9R7;Q5H9R7-2;Q5H9R7-4;Q5H9R7-5;Q5H9R7-6	93084.4	47427.7	48694.6
E9PKG1;G5E9B6;H7C2I1;Q99873;Q99873-2;Q99873-3	111850	133394	129328
E9PKP7;P17480-2	140956	101305	94831.7
E9PKS3;P17405	27756.2	25073.1	75719.9
E9PKT4;Q8N131;Q8N131-2	531251	552025	667191
E9PKU7	20367.5	18202	14984.3
E9PL01;Q15005	247880	238235	368488
E9PL17;Q92989	50278.8	47999.7	49614.4
E9PL22;F5H4Z5;Q9Y4L1	1.01856e+06	1.0318e+06	1.10358e+06
E9PL47;F8W860;Q9UBF8;Q9UBF8-2;Q9UBF8-3	Filtered	9354.91	150324
E9PL71	76234.9	68001.3	156298
E9PL82;E9PMR4;P48509	486586	416091	573917
E9PLD3;E9PRG8	164964	160390	145450
E9PLE4;E9PS47;Q9BVG9	96037.2	77782	108339
E9PLI6;E9PQD0;E9PRR8;E9PS30;E9PS76;Q8N9N8	10727.2	15083.4	21298.8
E9PLJ2;Q5VUV5;Q9BZP6;Q9BZP6-2;Q9BZP6-3	Filtered	Filtered	Filtered
E9PLK3;P55786	184725	251299	323531
E9PLM6;E9PPJ5;P21741	47743.4	48186.8	48471.2
E9PLN8;F8W9H0;I3L3B4;Q9BQB6;Q9BQB6-2;Q9BQB6-3	345810	367998	302492
E9PLY5	Filtered	Filtered	Filtered
E9PM19;F5H7K8;P29597	19413.7	15139.4	126496
E9PM46;Q96K76	8782.3	24921	32521.6
E9PM92;O00193	20731.1	32722.5	46755.6
E9PM96;P18074;P18074-2	36596.7	31312.3	22186.1
E9PMA3;Q8IZM9;Q8IZM9-2	Filtered	Filtered	Filtered
E9PMI6;P54105	56157.9	79453	92874.1
E9PML2;Q96CM3	46462.8	44247.2	48234
E9PML7;E9PPM8;Q9Y315	Filtered	21036.9	27144.5
E9PMM3;Q9Y5Y5;Q9Y5Y5-2	61277.3	20890.7	25054.7
E9PMQ6;Q00613;Q00613-2	Filtered	Filtered	Filtered
E9PMR6;Q9NZN5;Q9NZN5-2	8103.42	8002.53	8977.15
E9PMU7	38840.3	34311.5	19244.4
E9PN10;E9PND3;O00559;Q5Y8C7	136000	226576	98372.6
E9PN11;P08134;Q5JR08	184946	141957	175398
E9PN47;G5EA34;Q8NDH3;Q8NDH3-2	42038.5	39970.1	42522.1
E9PN65;Q13444;Q13444-2;Q13444-3;Q13444-4;Q13444-5;Q13444-6;Q13444-7;Q13444-8	26824.8	27133.6	26226.8
E9PNK6	25027	62269.6	38973.3
E9PNP3;E9PR47;Q9H7C9	Filtered	21344	19612
E9PNW4;E9PR17;P13987	446859	448563	574028
E9PNW5	4546696	5506023	6549418
E9PP15;Q14114;Q14114-2;Q14114-3;Q14114-4	Filtered	Filtered	Filtered
E9PP21;P21291	Filtered	24911.2	Filtered
E9PP28	Filtered	Filtered	Filtered
E9PPG8;Q53FT3	Filtered	46794.2	68166.6
E9PPN1;F2Z3M0;H0YCV5;Q8WW01;Q8WW01-2	Filtered	5458.3	4543.53
E9PPU0	11842.2	13790.3	80492.3
E9PPX7;F8W8H2;H0Y6L7;H3BQV1;Q0D2I5;Q0D2I5-4;Q0D2I5-5;Q0D2I5-7;Q5TF58	11469.5	8223.29	5641.41
E9PPZ9;O43292	83104.2	65514.8	140473
E9PQC4;Q9BZD4	15976	21179.7	15436.6
E9PQG7;Q03164;Q03164-2	36476.3	30314.6	38211.1
E9PQR4;P50607;P50607-2	40041.1	40181.4	37446
E9PQZ2;Q11206;Q11206-2;Q11206-3;Q11206-4;Q11206-5;Q8N6A6	Filtered	Filtered	Filtered
E9PR30;P62861	2.81709e+06	2626992	3.4699e+06
E9PR71;Q9P2Y5	3996.72	19558.4	34996.7
E9PRT4;Q4G0F5	135103	129873	134090
E9PRV2;F5H202;P46937;P46937-2;P46937-3	16209.9	30084.6	23617
E9PRW7	Filtered	Filtered	Filtered
E9PRY8;P29692-2	2.42856e+06	2.54654e+06	2.35687e+06
E9PSA5;Q96Q83	131653	139082	101201
E9PSI1	33418.4	22476.6	32249.4
F2Z2D5;Q8WVV4;Q8WVV4-1;Q8WVV4-3	Filtered	Filtered	Filtered
F2Z2E1;F5GY05;F5GZX9;Q96EK7;Q96EK7-2	13867.4	11857.3	17013.9
F2Z2E2;Q86VI3	29401.2	25001.1	28182.9
F2Z2T6;Q9HAH7;Q9HAH7-1	27820.1	Filtered	Filtered
F2Z2T8;F8VQY2;Q96RL1;Q96RL1-2;Q96RL1-3	Filtered	Filtered	Filtered
F2Z2U4;Q9Y4A5;Q9Y4A5-2	60735.6	46017.8	14452.5
F2Z2W7;Q8IZ69	96964.2	105648	120234
F2Z2X0;O00746;Q4TT34	95967.3	196491	207136
F2Z2X4;Q9C0E2	147863	114606	63644.2
F2Z317;Q9BYW2	11128.9	9704.87	92531
F2Z329;Q96Q45;Q96Q45-2;Q96Q45-3;Q96Q45-5	19653.4	20924.4	26610.6
F2Z384;Q96GJ1;Q96GJ1-2;Q96GJ1-3	70418.5	84284.5	40825.5
F5GWD1;Q9Y385	Filtered	13455.6	16746.4
F5GWD3;F5GWI8;F5GX35;F5GXG6;F5H4K7;F5H6X0;Q13889	Filtered	Filtered	Filtered
F5GWD7;Q8WVC0	225174	169057	113822
F5GWE0;Q15170;Q15170-2	Filtered	9727.11	11461.8
F5GWE5;Q00169	91881.1	124732	80837
F5GWF1;Q8TDJ6;Q8TDJ6-2	81887.6	35290.1	26524.5
F5GWG9	Filtered	Filtered	Filtered
F5GWH5;P61165	431202	282676	469907
F5GWI9;F5GXZ7;F5GZ97;Q9Y3C0	230648	192120	209539
F5GWJ1;O60245;O60245-2	24329.9	22428.5	17764.5
F5GWM1;Q14642;Q5T1B5	Filtered	9973.56	11169.3
F5GWM7	27901.3	Filtered	Filtered
F5GWP1;Q92575	335157	316581	380531
F5GWP3;H0YJ75;Q13362;Q13362-2;Q13362-3;Q13362-4	98790.3	86603.9	75468.4
F5GWR2	327610	239745	134357
F5GWR5;Q13642-1;Q13642-4;Q13642-5	86288.7	92329.5	104379
F5GWS3;Q6P9B6	59572.1	69773.5	84223.6
F5GWT4;F5H2M7;Q9H4A3;Q9H4A3-2;Q9H4A3-5;Q9H4A3-6	24059.2	27913	31061.1
F5GWU3;Q86YB7;Q86YB7-2	Filtered	Filtered	Filtered
F5GWU7;Q99717	119518	123649	120415
F5GWW1;Q8N283	447832	307395	152995
F5GWX3;P25445;P25445-6	77863.2	84451.1	61613.3
F5GWX5;F5H2G1;Q14839;Q14839-2	115544	101139	67517.5
F5GWY5;F5H3W1;O00592;O00592-2	84354	95595.2	121206
F5GX09;Q5HYJ3	73602.3	57992.7	68459.6
F5GX28;O94953	Filtered	Filtered	Filtered
F5GX30;P78364	Filtered	Filtered	Filtered
F5GX42	55782.6	62532.1	80067.7
F5GX65;Q8N2F6-5	18630.4	19407.6	21479.5
F5GX74;G3V1U0;Q6VMQ6	47136.3	53254.8	Filtered
F5GX82;O94915	18340.7	23239.4	26017.5
F5GXC8;Q9P2R7;Q9P2R7-2	676484	689891	557206
F5GXD5;G3V180;G3V1D3;Q9NY33	48919.2	79869.9	101050
F5GXE2;Q9NZ09;Q9NZ09-2	39374.6	Filtered	41070.5
F5GXE9;Q9Y3X0	32102.2	31870.8	10488.2
F5GXG0;Q96T88	129203	66996.9	39381.3
F5GXI9;F5GZ86;F5H5X3;H0YJH6;P42226;P42226-2	Filtered	17423.8	Filtered
F5GXJ0;F8W0W3;I3L0B9;Q5ST30	94177.7	70056.5	76755.2
F5GXK1;P20585	120389	109590	93881.8
F5GXK8;P0DJ07	28775.6	Filtered	Filtered
F5GXL7;I3L4X2;P33527;P33527-9	84469.6	84534.2	87833.3
F5GXL8;P09110	335713	320343	398208
F5GXM6;Q5THR1;Q9H5Z1	141372	Filtered	Filtered
F5GXP4;F5GY14;H3BPJ2;Q15041	179745	176997	219586
F5GXU2;O60678	33687.3	27624.1	38057.2
F5GXW6;O95415	Filtered	Filtered	Filtered
F5GXX5;P61803	Filtered	76378.7	97388.4
F5GY30;P04156;P04156-2	67095.6	73500.9	82625.5
F5GY80;F5H7G1;P07358	Filtered	6220.87	Filtered
F5GYA4;O14519	39703.8	36046.3	29027.5
F5GYD8;P04062;P04062-2	515848	518473	626289
F5GYE6;P04035	Filtered	Filtered	Filtered
F5GYH6;Q9Y217;Q9Y217-2	23888	20295.4	28062.3
F5GYJ5;Q9NX18	112537	79984	97056.5
F5GYN4;Q96FW1	119738	192560	224572
F5GYQ1;P61421	585989	524038	603624
F5GYQ4;P00367	3490665	3.69488e+06	3.71878e+06
F5GYQ5;Q5TBB1	44839.6	42298.5	28484.1
F5GYQ8	Filtered	13617.2	10477.6
F5GYX5;F5H445;O14513;O14513-2;O14513-3	739820	555459	562522
F5GYX8;F5H4W7;Q9NW81	139665	124435	123339
F5GZ02;Q96CP6;Q96CP6-2;Q96CP6-3	33913.1	25111.4	37715.2
F5GZ16;Q13200	166692	231083	286097
F5GZ28;P18858	33696.1	49927.6	73467.8
F5GZ51;Q8N5G0;Q8N5G0-2	258421	182159	196968
F5GZ78;F5H854;P49023;P49023-2;P49023-3;P49023-4	Filtered	Filtered	25001.3
F5GZ90;Q9NZJ0	10958	10169.6	8050.94
F5GZA2;F8WDA7;P39060;P39060-1;P39060-2	106049	109655	97632
F5GZB3;F8W891;H0YEW1;Q38SD2	185069	362120	313129
F5GZK1;Q9UBQ6	76888.2	36196.8	37467.4
F5GZL5;Q5VT94;Q9H3K2	112516	98065.8	109465
F5GZN0;Q7Z7A1;Q7Z7A1-2;Q7Z7A1-5	50420	39816.3	33452.9
F5GZS0;Q9H2U1;Q9H2U1-2	93751.1	114488	126076
F5GZS6;P08195;P08195-3;P08195-4	776312	724690	662268
F5GZX4;Q9H9Y6	61279.7	60309.9	16626.4
F5GZZ6;F5H5T2;F8VWA9;F8VXJ0;Q5BKT4;Q5I7T1	Filtered	Filtered	159552
F5H025;F5H1H0;G3XAF4;P32004;P32004-2	151519	132565	122215
F5H039;F8W7D6;Q9NQX3;Q9NQX3-2	38579.8	59843.9	77782.6
F5H055;Q5T0B9	Filtered	Filtered	Filtered
F5H066;F5H0S9;Q9UP95;Q9UP95-2	194094	218632	42187.7
F5H070;F5H4E6;Q9Y4C1	26105.2	16838.4	Filtered
F5H098;P40925	686437	1.1864e+06	1.56318e+06
F5H0C3;F5H219;F8W762;F8WCP6;Q7Z4S6;Q7Z4S6-2;Q7Z4S6-3;Q7Z4S6-4	8932.76	11014.5	9877.98
F5H0C4;Q9BRP4;Q9BRP4-2	32471.7	58147.7	67258.1
F5H0F5;Q8WU90	525422	517739	422587
F5H0F9;Q9UJX4	102869	64283.5	17862
F5H0G2;Q14849;Q14849-2	36128.2	36719.2	63883.2
F5H0H0	Filtered	Filtered	Filtered
F5H0H3;F5H1L1;Q15424	731063	405752	133889
F5H0J4;H0YGA7;H3BM05;Q9BY67	177919	199550	191144
F5H0J6	72497.1	64513.5	62221.6
F5H0K1;F8W9R9;O75448;O75448-2	36770.8	30089.7	18966.1
F5H0K8;F8WEA9	Filtered	Filtered	1466.21
F5H0L8;Q9Y6Y8	219897	203879	266858
F5H0N5;Q8ND04;Q8ND04-2	38594.4	41995.5	63086.1
F5H0Q5;P02765	260271	379832	359614
F5H0Q6;F8WAG9;Q8N2M8;Q8N2M8-3	41719.9	14927.6	20967.6
F5H0R0	Filtered	Filtered	Filtered
F5H0W0;H3BV55;O15305	30186.2	53535.5	Filtered
F5H0W2;Q8N428;Q8N428-2	Filtered	Filtered	Filtered
F5H0X5	86483.6	50311.1	13987.9
F5H0Z5;I3L172;Q9BUT9;Q9BUT9-2	Filtered	Filtered	7935.6
F5H1A8;F8WA45;P06396;P06396-2;P06396-3	66909.4	76078.3	69074.7
F5H1F7;P29375;P29375-2	Filtered	Filtered	Filtered
F5H1G4;F5H2X3;O60462;O60462-2;O60462-3;O60462-4;O60462-5	22826.3	22231.6	1.56756e+06
F5H1L4;F5H2M2;F5H2V0	850180	674181	675577
F5H1L8;H7C0T2;Q6GPH6;Q6GPH6-2	Filtered	21167.1	40506.4
F5H1N7;F5H2I6;Q6ZU35	8038.4	6888.85	6554.57
F5H1R5;P31323	63300.7	80888.9	58912
F5H1U5;P42357	Filtered	Filtered	Filtered
F5H1W0	18692.2	26694	18451.8
F5H1X8	36946.8	45177.5	48864
F5H1Y4;Q9HD26;Q9HD26-2	75041.6	53796.9	51458.8
F5H213;O00308	3627.21	3943.06	4634.88
F5H293;H7BXQ6;Q6UXD5-3	53742.1	43764.2	61227.6
F5H2A9;G3V1M7;P49748	379960	317143	308490
F5H2J3;Q96GC9	91763.6	87892	85291.5
F5H2M5;Q13129	2781.22	Filtered	Filtered
F5H2Q4;P43378	110800	37079	108308
F5H2Q7;F5H2Y7;Q9C0E8;Q9C0E8-2	293368	232960	342460
F5H2S2;Q8TF71	Filtered	17262.2	20326.4
F5H2S7;Q13561;Q13561-2;Q13561-3	102692	116007	131460
F5H2T1;Q5VUJ6	43767.7	40591.5	30341.6
F5H2U2;Q13523	50039.2	49719.7	23849.9
F5H2Y9;F5H3R1;H0YMG7;O94788;O94788-2	104158	90902.6	93625.7
F5H315;Q9HCS7	118232	97967.8	85673.3
F5H364;F5H7Q6	Filtered	Filtered	Filtered
F5H365;Q15436	330530	362620	379850
F5H398;P78563;P78563-3	24401.9	Filtered	Filtered
F5H3A1;P05023	4.26296e+06	3.88292e+06	4.10777e+06
F5H3E4;O95551;O95551-2;O95551-3	11170.8	35268.4	26856.4
F5H3H6;Q9BQ39	403009	561421	221826
F5H3J3;O43529	Filtered	Filtered	Filtered
F5H3N4;Q16850	145693	120797	212771
F5H3P9;Q969M3;Q969M3-3	88501.8	89507.7	86753
F5H3X5;Q99996;Q99996-2;Q99996-3;Q99996-5;Q99996-6	65759.2	63224.4	45235.8
F5H3Y1;H0Y7P1;Q93074;Q93074-2;Q93074-3	26276.3	32052.4	19234.8
F5H442;Q99816	94512.7	117151	111847
F5H476;Q5VTE6	1.85695e+06	2.04517e+06	1795059
F5H4C2;Q9H6Z4;Q9H6Z4-2;Q9H6Z4-3	36802.2	58575	70784.6
F5H4D0;Q2KHT3	37447.7	40422.5	48346.4
F5H4D7;G3V1L0;P78539;P78539-2;P78539-3	113895	Filtered	60824.6
F5H4E4;I3L2G3;Q9HA64	4379.7	30505.8	57509.8
F5H4F7;Q96JJ7	181325	192377	250417
F5H4G5;Q9UBV7	Filtered	Filtered	Filtered
F5H4I0;P09622	3.96538e+06	3099341	2949701
F5H4K0;Q5T9L3-2	43311.1	51246	42662.2
F5H4L0;Q9BSJ2	330321	355826	261338
F5H4M2;P54198	Filtered	Filtered	Filtered
F5H4P2;Q6GQQ9	7236.18	19695.5	14282.1
F5H4R0;Q59FE7	Filtered	Filtered	293987
F5H4U5;P04899-4	148711	171704	187823
F5H4U9;F8WA05;H0YKH1;H0YLF5;P40424;P40424-2	20531.3	36610.4	Filtered
F5H4V4;P46013	36935.9	15320.3	12116.5
F5H4W8;Q969U7	38659.6	43635.4	51241.3
F5H4Z4;H0Y6I6;Q96ME1;Q96ME1-2;Q96ME1-4	Filtered	Filtered	Filtered
F5H538;Q9Y6R4;Q9Y6R4-2	Filtered	Filtered	9257.62
F5H569;Q93050;Q93050-1	400082	397298	475508
F5H5D3	463227	635358	667681
F5H5E4;P54687;P54687-4	33403.8	56056.3	72224.3
F5H5H1;Q8NCL4	Filtered	Filtered	Filtered
F5H5I8;G3XAH6;P51003	58625.7	49270.5	53041.6
F5H5K9;Q8IY17;Q8IY17-2;Q8IY17-3	43688.7	47158.4	69091.2
F5H5M2;Q06828	Filtered	Filtered	Filtered
F5H5M6;Q14520	28213.1	29084.9	Filtered
F5H5M7;P15260	44286.4	47948.3	52715.1
F5H5M9;F5H865;Q9UKE5;Q9UKE5-2;Q9UKE5-3;Q9UKE5-4;Q9UKE5-5;Q9UKE5-6;Q9UKE5-7;Q9UKE5-8	Filtered	Filtered	9013.73
F5H5N0;Q5VT25;Q5VT25-2;Q5VT25-4;Q5VT25-5;Q5VT25-6	81111.6	70993.7	66651.8
F5H5N4;F8VVB6;F8W1A2;Q99435;Q99435-2;Q99435-3;Q99435-4	46747	Filtered	28335
F5H5P2;P12694	600542	550141	496637
F5H5R8;P18440	Filtered	Filtered	18448.5
F5H5S2;F5H5X2;Q6NS38	Filtered	Filtered	Filtered
F5H5T5;Q7Z3V4;Q7Z3V4-2	Filtered	Filtered	Filtered
F5H5V5;Q01167;Q01167-2	66204.6	43689.9	Filtered
F5H604	104038	120157	132611
F5H620;Q96HP4	54487.1	56227.3	149251
F5H647;Q15572;Q15572-4;Q15572-5;Q15572-6	14585.5	Filtered	Filtered
F5H656;Q8WXF1	752297	492909	430379
F5H668	49697.7	43439.8	50534.1
F5H669;Q8N684;Q8N684-2;Q8N684-3	150185	106391	71360.2
F5H685;H7BYY3;Q5JWT2;Q9ULK4;Q9ULK4-2;Q9ULK4-3;Q9ULK4-4;Q9ULK4-5	48556.1	47794.7	17332.9
F5H6B8;Q12872	136636	138243	63139.9
F5H6D1;H0YH47;H7C0U7	143956	136836	174365
F5H6K0;O43143	629106	594058	480627
F5H6L9;Q9NR20;Q9NR20-2	140679	156339	127560
F5H6R1;Q9Y388	Filtered	9635.58	11584.4
F5H6T3;O95873	12826	16312.1	Filtered
F5H6Z0;Q00537;Q00537-2	Filtered	Filtered	Filtered
F5H711;Q8N5M9	22232.2	18927.2	26189.9
F5H715;Q96BJ3	63396.8	85573.1	90876
F5H721;Q9Y2W2	127664	77961.6	48258.8
F5H7D3;O43567	48520.6	40471.4	68905.9
F5H7D6	26959.2	41896.3	Filtered
F5H7E9;O14802	31231.9	51350.2	62238.5
F5H7J9;O75581	39939	30162.2	30560.1
F5H7K4;Q6PIU2;Q6PIU2-2	83472.4	41096.1	65152.6
F5H7L1	Filtered	Filtered	Filtered
F5H7S4;O14757	25877.4	194154	268519
F5H7U7;O60507	Filtered	Filtered	Filtered
F5H816;P06737	84916.3	114548	127090
F5H843;O60669	18561.5	18745.4	18076.6
F5H872;Q13503	32124.8	15516.1	Filtered
F5H897;Q12931	4740114	4.32976e+06	4526556
F5H8F7;Q9UBL3;Q9UBL3-3	71001.4	40879.1	24578.6
F5H8I7;Q9Y5A9	202702	221021	188380
F5H8J3;O96005	68721.9	61845.1	89682.4
F5H8K4;O43242	71786.8	113954	153382
F5H8L2;Q6NTF9;Q9UDT1	Filtered	Filtered	36981.4
F5H8L9;Q5JRV4;Q92562	Filtered	Filtered	Filtered
F5HFY4;Q99733	202608	278690	321379
F5HGG6;P53634	789578	600387	731312
F6Q3Q2;F6SR56;F6TEP1;F6UCG7;F6UHJ8;F6V754;F6X9C6;F6XM29;F6Y981;H0Y4N7;H0Y4Q1;H0Y4V1;H0Y504;H0Y5A5;H0Y640;H0Y652;H0Y6F8;P20036	Filtered	Filtered	Filtered
F6S0T5;O60341;O60341-2	95908	61290.1	30829.1
F6TQG2;P28370;P28370-2	45979.4	3017.52	Filtered
F6VZ39;Q9H0Z9	55708.9	23699.4	18258.9
F6XS94;F8W7C5;Q08E86;Q14667;Q14667-2	10905.9	11242.7	11957
F6XY72	63644.7	61892	81722.3
F8VNW9;F8VSK3;F8VWH6;H0YI03;P40425	Filtered	Filtered	Filtered
F8VPD4;P27708	331933	443016	478998
F8VPF7;F8WCH5;Q96D96;Q96D96-3	20981.4	22617.3	31422.2
F8VPG7;Q13492;Q13492-2	38270.4	41883.7	38945.1
F8VQ10;Q13838;Q13838-2	3.16138e+06	2.61513e+06	1.41633e+06
F8VQD4;Q8TAD7	16404.7	21074.4	26573.7
F8VQD9;Q9BSB4	Filtered	7046.92	2561.33
F8VR31;P51530;P51530-2;P51530-3	13613	6835.46	9830.32
F8VRJ2	79257.2	72339.1	89873.4
F8VRQ1;F8VXY0;F8W6I7;P09651;P09651-2	6402662	4.01367e+06	1.78884e+06
F8VS64;P19013	198010	351138	237334
F8VS78;F8VWE0;Q12999	11918.3	14763.7	14972
F8VSL3;P25208	Filtered	Filtered	Filtered
F8VSZ4;Q9UIW2	70702.8	56636.9	97944.1
F8VU39;Q9UIF9;Q9UIF9-2;Q9UIF9-3	7763.04	3986.23	Filtered
F8VUJ3;Q8N4A0	21866.6	Filtered	33216.4
F8VUJ7	4.72378e+06	6.53387e+06	6.88974e+06
F8VV52;Q9NZN8	263942	263412	197161
F8VV69;F8W8P3;G3V1N7;Q6N075;Q6N075-2	Filtered	Filtered	Filtered
F8VVA7;P61923	427473	441334	386402
F8VVN7;F8VWX5;F8W098;F8W120;H0YIA4;Q9BVX2;Q9BVX2-2	Filtered	Filtered	Filtered
F8VW96;Q16527	49950.8	77561.4	44305.6
F8VW99;Q9H0K6	20025.2	30135.4	Filtered
F8VWT9	Filtered	Filtered	Filtered
F8VWZ8;Q52LW3	Filtered	4699.96	Filtered
F8VX04;Q9H2H9	45849.4	50981.1	35382.7
F8VXB4;P05787	1.21047e+06	1137670	902689
F8VXG7;Q99590;Q99590-2	24653.2	24651.9	3312.87
F8VXI9;Q14161;Q14161-3;Q14161-4	82232.1	89234.6	95221.7
F8VXZ4	273863	497774	537465
F8VY86;Q12888;Q12888-2	61625.5	43076.6	132239
F8VYA6;Q9NRL3	46635.8	49591.9	34043.9
F8VYE8;F8W0W8;P36873;P36873-2	197480	203540	209127
F8VZX2	3.83987e+06	4.09112e+06	3.82291e+06
F8W1H5;P51148	84848	83913.3	118395
F8W1S1;Q7RTS7	20557.6	18594.3	27354.1
F8W1T6;Q15434	98059.4	136617	68319.8
F8W682;P04920;P04920-2	80746.6	62833.7	86703.4
F8W6M3;Q9NYG2;Q9NYG2-2	35935.4	16753.9	33843.9
F8W6N3;Q92560	Filtered	Filtered	Filtered
F8W6N6;P10244	Filtered	Filtered	Filtered
F8W6V6;Q9H2D6;Q9H2D6-2;Q9H2D6-3;Q9H2D6-5	38649.8	35866.8	23295.6
F8W6X9;Q7Z5N4;Q7Z5N4-3	98527.7	82041.2	79093.4
F8W717;O00423;O00423-3	28699.3	24334.3	42367
F8W726	33686.1	37567.1	30502.8
F8W727;P62910	925793	1.13664e+06	1.3962e+06
F8W733;Q9NXR7;Q9NXR7-1;Q9NXR7-3;Q9NXR7-4	65831.8	71956.6	87153.4
F8W752;Q5R372;Q5R372-3;Q5R372-4	22106.4	30880.4	24798.3
F8W7K3	52755.5	61462.7	57958.8
F8W7M4;O14678	51519.4	14444.8	18192.7
F8W7P9;Q9H903;Q9H903-1	6544.14	6492.12	Filtered
F8W7Q4;Q96A26	1.14391e+06	877558	1.06015e+06
F8W7S1;Q8NAN2	32335.5	24917.3	20052.9
F8W7U2;Q02487;Q02487-2	98587.4	73336.5	76069.3
F8W7X5;H7BYT3;O75928;O75928-2;O75928-3	Filtered	18719.1	Filtered
F8W839;O60333;O60333-2;O60333-3;O60333-4	34095.6	35769.6	41625.8
F8W840;Q9BYJ9	200736	223648	263688
F8W842;Q6UUV7;Q6UUV7-3	5984.66	4283.98	Filtered
F8W892;H0Y3N5;Q5HYY5;Q96T21;Q96T21-2	74256.6	140066	168346
F8W8I6;H0YGW6;P31483	560070	493142	320189
F8W8K3;Q8N108;Q8N108-12;Q8N108-13;Q8N108-14;Q8N108-15;Q8N108-16;Q8N108-17;Q8N108-18	Filtered	Filtered	Filtered
F8W8Q7;H0Y6I0;Q13439;Q13439-3;Q13439-4	98699.4	83070.2	50151
F8W8W7;O43493-6	Filtered	Filtered	Filtered
F8W8Y9;G3V588;G3V5A3;H0YJE5;Q13572;Q13572-2	Filtered	24577.3	18702.4
F8W911;P38571;P38571-2	116632	115851	101932
F8W913;H7BY83;Q5JSH3;Q5JSH3-2;Q5JSH3-3	Filtered	35449.4	47145.6
F8W914	46014.7	77655.5	61206.8
F8W930;Q9Y6M1;Q9Y6M1-1	1.186e+06	1.16769e+06	1.22749e+06
F8W955;Q5JVF3;Q5JVF3-2;Q5JVF3-3;Q5JVF3-4	53344.5	74306.9	53542.5
F8W973;Q5SRE5;Q5SRE5-2	241324	193541	149797
F8W9B5;H9KV59;O43663	72969.4	79755.3	120595
F8W9C2;Q05086;Q05086-2;Q05086-3	18628	29978.1	38587.4
F8W9C9;Q8WVQ1	39505.4	200157	50342
F8W9D9;P46734;P46734-2;P46734-3	25396.6	34740.4	43419.4
F8W9H9;P08651;P08651-5	Filtered	Filtered	Filtered
F8W9I1	Filtered	Filtered	27370.6
F8W9I9;Q13627;Q13627-2;Q13627-3;Q13627-4;Q13627-5	30937.3	24920.2	29686.8
F8W9L4;P22607-4	52626	54406.2	100270
F8W9R3;P51797;P51797-5	21478	22738.3	Filtered
F8W9X7;Q567U6	79967	93501.4	80755.1
F8W9Y2;Q96T76	39680.1	57908.1	68206
F8WA39;Q13613	75728.9	75600.9	64305
F8WA59;P52655;P52655-2	Filtered	Filtered	Filtered
F8WAB8	Filtered	82869.7	77492
F8WAC3;Q9NWZ5;Q9NWZ5-4	Filtered	Filtered	Filtered
F8WAD8;G5E951;Q9P0K1;Q9P0K1-2;Q9P0K1-3;Q9P0K1-4;Q9P0K1-5	32756.8	35017.5	34710.3
F8WAF2;Q9H9A5;Q9H9A5-2;Q9H9A5-3;Q9H9A5-4	119148	131777	110493
F8WAI1	Filtered	10443.1	13837.7
F8WAJ0;Q9H8H2	227604	19929.5	17205
F8WAK8;Q8N3U4;Q8N3U4-2	82582	69256.7	35307.7
F8WAN7;H7C4X9;Q9ULU4-12;Q9ULU4-13;Q9ULU4-14;Q9ULU4-9	45322.4	30202.4	20293.5
F8WB05	76705.5	85862.7	61531.4
F8WBK2;O43493;O43493-2;O43493-3;O43493-5	11988.6	15573.5	12259.9
F8WBK5;Q9NQ50	568214	473938	540981
F8WBS1;Q9H832	12922.1	20655.3	22597.5
F8WBZ9;O75386	22621.6	Filtered	Filtered
F8WC15;P11166	75282	67241	81610.7
F8WC38;O75818;O75818-2	Filtered	Filtered	Filtered
F8WC68;O77932	Filtered	13008.6	13591.4
F8WCA0;P63027	160805	166301	162939
F8WCA3;Q8IX15	16687.5	Filtered	Filtered
F8WCD0;Q8NC42	35305.4	32171.7	38281.5
F8WCG1;O14657	222044	292181	225857
F8WCL7;Q9C086	Filtered	Filtered	Filtered
F8WCS9;Q70Z53;Q70Z53-2;Q70Z53-3;Q70Z53-4;Q70Z53-5	Filtered	Filtered	Filtered
F8WD04;G5E9T1;Q8WXF7	15813.3	12703	22001
F8WD63;Q70Z35;Q70Z35-2;Q70Z35-3	Filtered	Filtered	22622.2
F8WDL0	173070	195682	163388
F8WDM9;Q9NZM5	69293.4	57575.6	39252.6
F8WDY3;I3L0G8;P28715	17364.9	16973.6	16706.3
F8WE88;Q9Y4I1;Q9Y4I1-2	31211.6	34995.1	42981.4
F8WEC0;Q9H3L0	Filtered	27166.2	21020.5
F8WEC9;P02462;P02462-2	70839.2	80301.5	78651.8
F8WEQ4;P52735;P52735-2;P52735-3	419414	Filtered	204084
F8WF14;P06276	58984.6	50866	67816.2
F8WF48;Q99442	375778	292641	557222
F8WJN3;Q16630;Q16630-2;Q16630-3	315160	213625	175316
G3V0G5;Q8IV38	16382.6	22215.6	52061.6
G3V0I5;P49821;P49821-2	2023655	1.71984e+06	1.82235e+06
G3V0I6;Q01804;Q01804-3	93086.9	122278	118221
G3V117;Q9NPA8	220699	168180	142382
G3V130;Q96E29;Q96E29-2	42191.8	41079.6	47574.9
G3V167;Q9UGN5;Q9UGN5-2	155803	167734	216961
G3V1C4;P30260	38423.4	35380.6	30379.1
G3V1J3;O75027;O75027-2	85777.2	79472.1	89922.9
G3V1K2;Q9Y2B1	Filtered	Filtered	Filtered
G3V1K3	161253	204022	223769
G3V1N1;O15226	77262.1	56957.9	41991.6
G3V1N2	762680	649672	545791
G3V1P3;Q969J3	100030	91669.5	109269
G3V1R9;G5E9U0;Q9NPH2;Q9NPH2-2	21170.2	36294.2	41107.8
G3V1S2;Q13617	56936.9	62226.1	73730.1
G3V1S4;G3V5S9;Q9Y324	65334.7	45363.3	53414.6
G3V1U1;Q8N118	29656.7	25942	31260.8
G3V1U8;P51948	37877.3	25637	12877.7
G3V1V0	1.15419e+06	1.16995e+06	1.35674e+06
G3V1V1;Q8TBF4	Filtered	Filtered	Filtered
G3V1X9;P45973	406102	279385	95126.2
G3V2F7	273314	399631	483408
G3V2T7;H0YFJ8;Q8WXE9	15393	7331.52	8167.32
G3V2U7;P07311	3047.91	11165	22447.5
G3V2Y4	49011.8	Filtered	53412.8
G3V325	178152	153245	171069
G3V3F1;Q8NHV4	154738	175452	127086
G3V436	227405	198616	181872
G3V4K3;Q9H9C1	48164.3	38950	15946.1
G3V4L5;Q9BQT8	95209.7	56565	82314.9
G3V529;Q9GZR7	18765.1	14625.1	13443.1
G3V533;Q6ZMZ3;Q6ZMZ3-2	3982.23	3721.4	9470.23
G3V583;Q8N128;Q8N128-2	192566	140464	106279
G3V599;G3XAC5;O15320;O15320-3;O15320-4	50687.3	33809.4	79697.9
G3V5J8;Q9NUM3;Q9NUM3-2	Filtered	Filtered	Filtered
G3V5L1;P61244;P61244-2	67678.6	32449.1	9285.28
G3V5P4;Q9Y281	310072	301036	356539
G3V5Q5;Q9BU02	Filtered	Filtered	Filtered
G3V5T0	79642.3	89908.8	88279.9
G3V5T9;P24941	176647	217043	217601
G3XA81;Q9BTX1;Q9BTX1-2	148866	153293	179667
G3XA93	14815.7	Filtered	6915.2
G3XAA0;Q8NFD5;Q8NFD5-2;Q8NFD5-3	48910.3	30731.3	64361.5
G3XAB3;Q96AE7	43035.8	44464.7	75400.2
G3XAB8;Q9HCJ0;Q9HCJ0-2	20183.2	16318.2	Filtered
G3XAE6;Q8IWU5;Q8IWU5-2	4163.45	Filtered	8579.9
G3XAG2;H0YNH8;Q9BZF9	1.9131e+06	2.09491e+06	3.59273e+06
G3XAI2;P07942	118122	109666	111536
G3XAI9;Q5BKY9	257589	49731.8	64320
G3XAJ0;Q6JQN1	92763.3	47444.2	73391.2
G3XAN8;Q9Y5J9	2.78173e+06	2.17756e+06	2.08486e+06
G3XAP3;H7BY43;Q9NUT2;Q9NUT2-2	76855.4	74889.6	85692.4
G3XCN9;Q86TS9	550154	405311	384533
G5E927	100975	71145.1	37556.2
G5E933;O95248;O95248-4	59222.9	58046.4	44266.8
G5E934	85934.8	80703.3	40951.1
G5E943;Q14542;Q14542-3	4937.52	5789.36	8029.76
G5E947	191409	171702	200247
G5E948;O95819;O95819-3	138210	141967	146578
G5E949;P51649	752661	629814	647514
G5E994	18435.5	41471.2	23587.3
G5E9A6;P51784	28003.8	31000.6	35873.4
G5E9B3;Q9BXB1	Filtered	Filtered	Filtered
G5E9D6;H0YJ86;Q9NS73;Q9NS73-2;Q9NS73-5	Filtered	Filtered	Filtered
G5E9E2;P29372;P29372-2;Q5J9I4	40589.1	29983	21614.7
G5E9E7;Q07157-2	291008	274428	188737
G5E9F3;Q9Y6J0	11841.5	20231.6	Filtered
G5E9F4;G5E9M7;G5E9M9;Q14135;Q14135-2;Q14135-4;Q14135-5;Q14135-6	Filtered	Filtered	Filtered
G5E9K7;O95251	16867.3	16391.2	Filtered
G5E9M5	874962	811131	872264
G5E9M6;Q9NX61	22967.3	43275.2	35599.8
G5E9M8;P08047	33894.5	11833.4	9402.05
G5E9N1;Q86VX9;Q86VX9-2;Q86VX9-3	Filtered	61144.6	59842.7
G5E9U1;Q15642;Q15642-2;Q15642-3;Q15642-4	26678.7	32936.9	35945.6
G5E9V1;Q92734	69787.7	124927	178038
G5E9V5;G5E9W7;P82650	1.31149e+06	1.03838e+06	1.06415e+06
G5E9W2;Q9P2E5	30341	30427.4	27664.3
G5E9Y2	128733	164276	176351
G5EA00;Q8WUR7	176780	150987	158529
G5EA09;O00560-2	386028	352679	405686
G5EA30;Q92879-4	595152	457802	247513
G5EA42;Q9NZR1	70726	70122.4	40583.7
G8JL95;Q9Y6X3;Q9Y6X3-2;Q9Y6X3-3	12963.9	9775.74	Filtered
G8JLB6;P31943	5.80181e+06	4.04392e+06	2.55662e+06
G8JLC9;Q63HQ2-2;Q63HQ2-4	Filtered	Filtered	Filtered
G8JLD3;G8JLM9;Q8IUD2;Q8IUD2-2;Q8IUD2-3	67799.3	62885.1	67294.8
G8JLD5;O00429-2;O00429-4	39151.6	58640	61116.3
G8JLE5;Q9BVW5	15543.5	22444.3	22859.2
G8JLG2;Q15517;Q2L6G8	Filtered	Filtered	5377.99
G8JLI1;Q4LE39;Q4LE39-2;Q4LE39-3	36733.6	50058.5	32860.9
G8JLI4;P02458;P02458-1	12684.9	10502.9	Filtered
G8JLI6;Q8IVL6	142888	121530	150334
G8JLJ6;H3BLT4;O15392;O15392-2;O15392-4;O15392-5	4412.89	4951.47	Filtered
G8JLK4;O75410;O75410-2	40205	44893.2	40329.1
G8JLL7;Q9H7P6	31348.3	36890.2	26044.5
H0Y2M7;H0Y599;Q8N1I0;Q8N1I0-3	22239	Filtered	Filtered
H0Y2P2;Q96IV0;Q96IV0-2;Q96IV0-3	33078.1	35208.5	36198.5
H0Y2P9;H7C0F2;Q8TBF5;Q8TBF5-2	7863.14	11186.9	2544.16
H0Y2T3;Q6IAN0	130612	85582.7	186358
H0Y2T7;Q9P2C4	213210	255463	184762
H0Y2Y8;Q15942	72213.3	97597.5	106064
H0Y2Z4	17570	18239.6	Filtered
H0Y327	46224.7	54558.2	72218.5
H0Y360;Q01433;Q01433-2	70938.6	74795.7	54210.1
H0Y3H2;Q99758	950266	Filtered	Filtered
H0Y3J5;Q9Y233;Q9Y233-2	28111	Filtered	20304
H0Y3R8	Filtered	Filtered	Filtered
H0Y3Y8;Q6NUK4	Filtered	24620.8	103904
H0Y449	60522.2	71710.7	68747.2
H0Y465;P21359;P21359-2	13868.8	16517.9	19354.3
H0Y477	46961.5	78886.9	99126.6
H0Y501;H7C1M5;Q9H147	Filtered	Filtered	Filtered
H0Y5H2;H7BY75;Q9BTV7	19193	18971.9	Filtered
H0Y5J5;Q7RTV5	Filtered	12633.8	Filtered
H0Y612;Q9UPN9;Q9UPN9-2	26756.3	26904.5	17262.7
H0Y645	Filtered	Filtered	Filtered
H0Y6C3;Q53H96	45602.3	61734.2	64456.2
H0Y6E6;Q92622;Q92622-3	8071.01	16532.6	7221.53
H0Y6K5;H0Y7L6;Q02447;Q02447-2;Q02447-3;Q02447-4;Q02447-5;Q02447-6	17658.8	8027.44	5455.83
H0Y7A5;Q9BX10;Q9BX10-2;Q9BX10-4	39415	35132.6	35115.7
H0Y886;O43674	367674	308532	357953
H0Y8A7;Q9NV92	35035.3	30458.4	29657.3
H0Y9R1;Q8IYR6;Q8IYR6-2	Filtered	Filtered	Filtered
H0Y9X1;Q96EY4	89976.2	58383.7	67245
H0YA52;Q9H0N5	106441	66628.6	65389.5
H0YAR1;Q9Y4K0	Filtered	Filtered	37661.3
H0YAV1;Q7LG56	Filtered	Filtered	Filtered
H0YAZ3;O60504;O60504-2	Filtered	86602.8	115031
H0YB13;O76061	22280.5	11355.1	20978.7
H0YCK3;P55265-2	65574.3	57308.9	94248.9
H0YD93;Q8WXA3;Q8WXA3-2;Q8WXA3-3	49043.5	52569.7	69399.8
H0YDM2;I3L0I1;O94964;O94964-2	40460.6	29183.8	20240.3
H0YDQ8;Q53ET0;Q5T4K5	Filtered	Filtered	12547.6
H0YDU8;P53041	73709.6	109338	144208
H0YE28;Q8IZQ5	Filtered	Filtered	Filtered
H0YE66	26899.2	25341.1	38813.5
H0YE88;P28347	Filtered	256661	Filtered
H0YEB6;O60232	139592	195744	132566
H0YEF7	51516.4	49563.6	41215
H0YEL0;O14893;O14893-2;O14893-3	88556.4	95681	102034
H0YG33;P08107	9448927	10420142	10933177
H0YG49;Q01130	2.37983e+06	1657766	1.14502e+06
H0YGC0;P52756	79641.5	49243.5	13657.1
H0YGH4;P01023	50174.3	81392.8	83588.2
H0YGP4;P31327	316243	330644	325827
H0YGR4;Q9Y3B8	257362	245689	231203
H0YH46;Q9NVR0	Filtered	Filtered	3891.76
H0YH67;Q8N8S7-2	235004	172120	235892
H0YH94;Q9NPR9	84732.4	67452.8	17461.5
H0YHD9	269837	267240	338874
H0YHF1;Q96MF6;Q96MF6-2	Filtered	Filtered	Filtered
H0YI09;Q9H8H3	355845	345826	558643
H0YI46;Q14D22;Q9BY43	Filtered	Filtered	Filtered
H0YIE9;O94952;O94952-1;Q4G104;Q8IUQ5	Filtered	Filtered	Filtered
H0YIV9	378604	299960	302119
H0YK61;H0YNK0;H0YNK8;Q5J8M3;Q5J8M3-2;Q5J8M3-3	81978.1	89404	117512
H0YK72;H0YK83;H0YNG3;P67812	129995	205682	56598.2
H0YKN5;Q9GZN2	Filtered	Filtered	Filtered
H0YLB5;P14859;P14859-2;P14859-3;P14859-4;P14859-5	100621	67355.1	51255.5
H0YLH3;Q92696	9541.37	35544.1	24650
H0YLN8;Q96QT4	4911.53	6072.18	4607.04
H0YLU8;H0YMD1;P01130;P01130-3;P01130-4	56211.4	33411.5	33680.3
H0YLV5;H0YMB3;H0YNJ6;Q6PKC0;Q86T14;Q9P2T1;Q9P2T1-2	9329.29	16553.2	14784.6
H0YLW2	Filtered	Filtered	Filtered
H0YLY9;Q14442	Filtered	15079	21366.7
H0YMV8;Q71UM5	1.56023e+06	1.98306e+06	1.92553e+06
H0YN65;Q8NCH0	29374.9	35387.2	34424.6
H0YNH6;Q9Y3B6	139384	116772	117996
H0YNP1;O94923	260861	418555	1295852
H3BLU6;Q63HN8;Q63HN8-4	Filtered	Filtered	Filtered
H3BLV9;Q96SB4;Q96SB4-3	235772	243323	294925
H3BLW6;Q5T3F8	33030	30150.4	34055.8
H3BLZ8;Q92841	2.45631e+06	2100349	1339565
H3BM14;H3BM74;Q9Y5A7;Q9Y5A7-2	3880.62	21094.8	21357
H3BM82;Q6FIF0;Q6FIF0-2	Filtered	Filtered	Filtered
H3BMF4	417381	383661	392685
H3BMJ2;Q6ZRI6;Q6ZRI6-2	Filtered	Filtered	Filtered
H3BMM9;H3BTC0;H3BV80;Q15287	675396	468669	304732
H3BMQ0;P49815;P49815-2;P49815-3;P49815-4;P49815-5;P49815-6	Filtered	19167.2	27432.3
H3BMQ5	129678	123612	119438
H3BMU1;H3BUI0;P53990;P53990-2;P53990-3;P53990-4	77678.1	85288.7	89729.8
H3BMX2;H3BQY8;H3BUT6;Q9NTJ4	13763.1	19373.3	40854.2
H3BN51;H3BQA4;H3BR94;H3BS05;H3BUD2;Q9BTE1	29758.2	37152.9	35775
H3BN55;H3BS49;H3BU81;H3BUD9;H3BVH7;P51159;P51159-2	Filtered	Filtered	87437
H3BNP9;Q9Y6N5	Filtered	Filtered	Filtered
H3BNQ7;H3BRN4;P80404	Filtered	Filtered	Filtered
H3BNR7;H3BS25;Q9BY12	43745.7	53095.9	58705.1
H3BNT4;H3BSB3;Q99547	116587	91887	80884.9
H3BNU3	51397	56420.7	58520.7
H3BNY3	2369929	2.68142e+06	2.70702e+06
H3BP13;H3BUK6;Q9UL33;Q9UL33-2	Filtered	67700.8	48251.8
H3BP28;Q99807	200239	173173	160711
H3BP91;P42126	1.06926e+06	1.02272e+06	984475
H3BPE1;H3BQK9	102498	103912	112247
H3BPG9;Q58EX7;Q58EX7-2	Filtered	Filtered	Filtered
H3BPX2;Q5VST9;Q5VST9-2;Q5VST9-3;Q5VST9-5;Q5VST9-6	23685.2	25310.7	43342.2
H3BQB8;H3BUX2;O43169	58466.8	74626.2	92451
H3BQH3;Q8TBB5;Q8TBB5-2;Q8TBB5-3	15920.3	19852.3	27376.8
H3BR50;P27449	Filtered	Filtered	Filtered
H3BRB6;Q8ND25;Q8ND25-2	Filtered	Filtered	Filtered
H3BRL3;O14562	66807.4	68547.7	83818.9
H3BRQ0;Q96CD2;Q96CD2-2	Filtered	13948.3	15571
H3BRY3;P31146	Filtered	15412.4	Filtered
H3BS42;Q9H5H4	42051.8	29528.2	22141.3
H3BS47;H3BV03;Q68CZ1;Q68CZ1-2	Filtered	54676.6	Filtered
H3BSH7;Q969X6	83035.8	57646.4	29871.3
H3BSM5;P60520	41176.7	46403.6	49954.8
H3BST1;Q9UL45	Filtered	Filtered	Filtered
H3BT11;Q9NVU0;Q9NVU0-2;Q9NVU0-3	27329.8	27511.2	36644.9
H3BTN6;Q9H6L2;Q9H6L2-2;Q9H6L2-3	Filtered	9211.92	2367.62
H3BUA6;Q8N543	14904.4	15098.2	17724.9
H3BUV4;Q9NWW5	84526.3	75235.9	92487.9
H3BUV9;Q96S82	Filtered	29244.2	28058.8
H3BV00;Q6EEV4;Q6EEV4-2	Filtered	22967.6	Filtered
H6UMI1;O95166	65874.9	2814011	64384.4
H7BXC6;Q96RQ1	34153.5	41557.7	49739.4
H7BXD5;H7C2Z6;P28676	118971	107133	82803.7
H7BXF4;Q9NXE4-2	45921	34121.8	57762.2
H7BXF5;Q9H0E3;Q9H0E3-3	48620.8	28692.2	Filtered
H7BXW3;Q9UNF1;Q9UNF1-2	31424.6	54915.2	61698
H7BXY8;O75882;O75882-2;O75882-3	77939.5	16887.1	17290.1
H7BXZ6;Q8IXI2-5	320132	242858	258228
H7BY36	30924.5	18968.7	33530.6
H7BY58;P22061-2	2.10524e+06	2060379	2.36993e+06
H7BY99;Q8IZ21;Q8IZ21-2;Q8IZ21-3	42967.8	36126.8	30756.5
H7BYB2;Q5T8D3	123279	124398	127889
H7BYG3	611218	246772	289689
H7BYJ1;Q969K3;Q969K3-2	Filtered	10347.8	28104.9
H7BYJ8;P48960;P48960-2;P48960-3	107218	112445	115096
H7BYM7;Q86XZ4	20488	22383.6	22522.7
H7BYP5;Q5VUB5	32640.7	Filtered	26339.7
H7BYW0	68823.9	100676	78220.2
H7BYY1	40866.8	53082.2	78938.4
H7BZ14;Q9H2H8	67280.9	61299.9	52413.2
H7BZ59;Q969E2;Q969E2-2	206061	313019	390122
H7BZJ3	4324716	4.21369e+06	4862663
H7BZK6;P62068;P62068-2;P62068-3;P62068-4	7324.88	10244	10375.2
H7BZR0;P18887	356954	258773	222716
H7BZT4;P61956;P61956-2	28186.6	27843.8	22167.8
H7BZY3;H7C4B9;Q9P1T7;Q9P1T7-1	7656.98	7623.26	5855.8
H7BZY9;Q8WTS1	25106	14295.6	11048.5
H7C0B3;H7C1G1;Q96K49;Q96K49-2	Filtered	94370.6	4679.91
H7C0S8;O75575	Filtered	Filtered	Filtered
H7C1J4;Q6BDS2	197256	139029	60407.7
H7C1N3;O15155	59821	70577.9	92862.4
H7C1U3;Q5T0F9-2	44350.8	32112.9	116644
H7C1U8;Q9BUR5	396223	358895	361779
H7C285;O95858	18887.6	18623.6	28699.5
H7C2Q8;Q99848	286062	172290	90538.1
H7C2V5	37347.4	30542.6	39264.9
H7C3B3;H7C4C1;Q9NVV0	Filtered	Filtered	Filtered
H7C3D8;Q7Z7K0	339337	272053	235686
H7C3K3;Q15057	Filtered	Filtered	22388.5
H7C3R6;Q8IWT0;Q8IWT0-2	Filtered	22299	28092.5
H7C4C9;Q3B820;Q3B820-2;Q3B820-3	Filtered	Filtered	Filtered
H7C4P8;Q6ZU65;Q6ZU65-2	Filtered	Filtered	Filtered
H7C4T5;Q9NR56-2;Q9NR56-3;Q9NR56-4;Q9NR56-5;Q9NR56-6	166736	155457	129986
H7C4Z8;Q6P1Q9;Q6P1Q9-2	21644.5	35202.7	32284.4
H7C561	58635.8	32200	6536.64
H7C5B8;O95178	209049	92603.7	132405
H7C5E8;P02787	21803.2	26409.1	37681
H7C5I4	70675.7	35856.2	35552.6
H9KV30;Q8N9B5;Q8N9B5-2	Filtered	Filtered	Filtered
H9KV44;Q14156;Q14156-2	61693.2	58432.4	63138.4
H9KV46;Q86Y91;Q86Y91-2;Q86Y91-3;Q86Y91-4	46517	44349.5	26789.4
H9KV86;Q96JP5;Q96JP5-2	28989.6	25764.6	24348.5
H9KVA9;P46736;P46736-2;P46736-3	45686.7	49572	60540.3
I3L072;Q9BSJ5-2	71931.6	49303.5	61148.8
I3L085;Q8TCC3;Q8TCC3-2	113534	101848	105827
I3L097;Q6ZSR9	29048.3	25394.1	38050.9
I3L0A4;Q9NQA3	39979.6	45722.5	37319.7
I3L0C1;Q96Q15;Q96Q15-2;Q96Q15-3	50503.2	54327.2	47764.7
I3L0D3;P00738;Q0VAC5	Filtered	Filtered	Filtered
I3L0E3	638335	563049	599871
I3L0K7	18742.5	21536	Filtered
I3L0L6;Q9H6Y7	62209.1	37988	55767.4
I3L0N3;P46459	549813	566459	623298
I3L0U5;Q6PK04	44466.8	18029	25826.5
I3L0X5;O75391	96555.6	59516.9	74152.2
I3L100;I3L2W2;Q96JN8;Q96JN8-2	50433.4	48752.1	36271
I3L112;P52429	48305.8	51371.1	74277.1
I3L124;I3L1H1;I3L266;I3L3K8;Q86WA9	Filtered	Filtered	13206
I3L1Q2;Q8WUZ0;Q8WUZ0-2	117533	Filtered	Filtered
I3L1Y9;Q96CP2	38529.2	34242.1	36877.5
I3L291;Q16625;Q16625-3;Q16625-4	67224	46113.6	75467.4
I3L2B0	19620.8	29154.9	29402.2
I3L2C7;P57678	66629.9	28369.7	30252.2
I3L2H2;Q15697;Q15697-2	Filtered	Filtered	Filtered
I3L2J8;Q9UPN4;Q9UPN4-2;Q9UPN4-3	38045.2	33189.4	31146.8
I3L2N2;O14641	602999	507987	252111
I3L2Q6;I3L3Q1;Q6ZSZ5;Q6ZSZ5-2;Q6ZSZ5-3	Filtered	Filtered	Filtered
I3L2R9;Q9NXR1;Q9NXR1-2	56184.3	50698.5	58556.4
I3L383;I3L3R1;P17481;P31273	Filtered	Filtered	Filtered
I3L397;I3L504;P63241;P63241-2	1.96905e+06	2131248	2.31565e+06
I3L3A8;Q8IZL8	137487	152334	62153.7
I3L416	296795	267252	291124
I3L448;Q5TC12	115352	113579	111287
I3L4C2;Q9UQB8;Q9UQB8-2;Q9UQB8-3;Q9UQB8-4;Q9UQB8-5;Q9UQB8-6	46358.3	63112.3	41232.6
I3L4I4;O75674;Q8N749	17231.8	17943	19678
I3NI00;P35613;P35613-2	6125315	6.24293e+06	6.75109e+06
O00116	536369	552786	689878
O00124;O00124-3	3026.16	3518.41	9557.3
O00139-2	139116	167999	159487
O00148	123306	123090	64437.9
O00151	29761.9	36694	55279
O00154;O00154-4;O00154-6	155165	230978	302741
O00159-2	56772.5	61896.3	78517.8
O00161	305262	330029	315612
O00165	584450	424154	409343
O00170	129923	172152	209629
O00178	167390	189207	221836
O00186	455906	529840	546128
O00217	2523119	1.99678e+06	2.03472e+06
O00231	119521	178319	203977
O00232	94325.1	156058	181841
O00233	51329.4	50790.8	62746.7
O00257	22386.2	Filtered	2519.76
O00264	2238230	1869896	2.89856e+06
O00267;O00267-2	62144.5	57824.4	36011.6
O00268;Q5TBP5	25285.4	17849.4	30402
O00273	39431.2	56508.1	76318.3
O00287	31266.4	Filtered	Filtered
O00291	47000.6	45301.5	51443.9
O00299	414512	692198	895473
O00311	10693.9	10659	10926.7
O00330	1.28206e+06	1.01755e+06	1.04335e+06
O00399	41199.7	36970.7	35425.1
O00400	79096.1	43141.4	31386.6
O00401	45187.2	51442.8	265632
O00410;O00410-3	605020	711940	734617
O00411	190403	147383	139534
O00418	Filtered	38483.8	36216.3
O00422	105693	42264.5	49335.9
O00425	1.24129e+06	1.26032e+06	1.52019e+06
O00442	109611	187527	181944
O00443	58952.3	52062.9	58700.6
O00461	30111.3	30478.2	35694.1
O00462	64567	75848.2	33889.8
O00468	72091.2	60114.5	53442
O00469-2	316405	350680	420160
O00471	39728.1	22063.1	26035.2
O00479	31151.4	15829.4	9603.13
O00483	2.3964e+06	2401161	2.41462e+06
O00487	172573	287754	353367
O00488	36205.6	Filtered	Filtered
O00505	138931	151784	131351
O00512	113270	85094.3	88156.6
O00548	Filtered	Filtered	Filtered
O00560	78948.6	95003.9	104035
O00566	148042	78568.7	44363.9
O00567	118885	95242.2	52058.6
O00571	1197715	1.25756e+06	1.10486e+06
O00623	53485.1	22858.4	30016.9
O00625	Filtered	Filtered	Filtered
O00629	76103.2	70251.1	66243.7
O00743;O00743-2;O00743-3	27416.9	51530.7	58020
O00762	28634.7	48311.4	52708.2
O00764	116090	184521	275291
O00767	42293.6	62720	65889.3
O14494	22233.1	17752.4	34898.5
O14495	Filtered	Filtered	Filtered
[truncated: 4,968 more rows]

## Sheet: SDGC
Abundances - SDGC (Sucrose density gradient centrifugation)
PG.ProteinAccessions	Replicate 1	Replicate 2	Replicate 3
A0AVT1	28121.4	29854.5	15620.1
A0FGR8-2;H7BXI1	121223	157459	65643
A0JLT2;A0JLT2-2	Filtered	65333	Filtered
A0JNW5	Filtered	Filtered	Filtered
A0MZ66;A0MZ66-2;A0MZ66-3;A0MZ66-4;A0MZ66-5;A0MZ66-6;B7Z7Z9	Filtered	Filtered	Filtered
A0PJW6	767235	384668	438851
A0PJZ3	Filtered	Filtered	Filtered
A0T4C8;E7ETB1;E9PCV4;Q9NRA0;Q9NRA0-2	Filtered	Filtered	30012.8
A1KXE4;A1KXE4-2;E7EVB9	18457.5	19330.8	28245.5
A1L020	Filtered	Filtered	Filtered
A1L0T0	106455	151741	109347
A1L170;A1L170-2;F8W6W0	Filtered	Filtered	Filtered
A1L188	173223	145637	120312
A1L443;D3YTH6;E2QRH1;F2Z373;Q5VZR2	Filtered	Filtered	Filtered
A1XBS5;A1XBS5-2;A1XBS5-3;A1XBS5-4;E5RGD0;F5H8I5;F8W7P5;G8JLC7;G8JLK8;H0YC32	Filtered	Filtered	Filtered
A2A2E9;Q86X10;Q86X10-3	Filtered	Filtered	Filtered
A2A2G4;Q9Y672	Filtered	Filtered	Filtered
A2A2L5;A8MSH5;Q9BY42	16761.4	11466.5	11526.6
A2A2Q9;Q9Y312	407090	Filtered	Filtered
A2A3N8;E7ENY0;E7EV99;P35611;P35611-2;P35611-3	36331.3	51112.7	62498.2
A2AAT3;B0S7V1;E9PD01;F6QTR8;F6REG0;F6RG32;F6SGB5;F6U8F7;F6UB75;F6UBK4;F6UKM5;F8VZ50;P28068	Filtered	Filtered	Filtered
A2AB90;A2ABB9;A8MUD0;D3YTI9;G5E9H8;O15533;O15533-2;O15533-3	5425.45	8329.92	7643.46
A2ABE9;A3KGM4;A3KGM5;A3KGM6;A3KGM7;B0UXD5;B0UXD6;B0UXD7;E7ENS8;H7C2J4;H7C5D6;O43196;O43196-2;O43196-3;O43196-4;Q5SSQ8;Q5SSR2	Filtered	Filtered	37788.5
A2ABF8;A2ABF9;B0UZY0;B0UZY1;B0UZY3;H0YHA9;H0YIM0;Q96KQ7;Q96KQ7-2	20664	39813.4	46728.9
A2AEA2;A2AEA4;F5GXA6;P10321	53871.5	124688	94365.8
A2BEU2;F5H135;P04440	Filtered	Filtered	67877.1
A2RRP1	43169.3	101190	84347.2
A2RTX5;A2RTX5-2	Filtered	Filtered	Filtered
A2RU67	Filtered	14236	13225.2
A2VCQ3;Q01973	Filtered	Filtered	Filtered
A3KFJ0;O14965	Filtered	Filtered	Filtered
A3KFL4	38983.7	80152.8	75336.8
A3KMH1;A3KMH1-3	622411	586933	535262
A3KMH1-2	149855	99796.7	110472
A3KN83;A3KN83-2;A3KN83-3	Filtered	Filtered	Filtered
A4D104	Filtered	Filtered	Filtered
A4D1D5;P21439;P21439-2	Filtered	Filtered	Filtered
A4D1E9	1.88184e+06	787597	1.16061e+06
A4D1P6	2.08738e+06	10215.3	Filtered
A4D1S0;A4D1S0-2	Filtered	Filtered	Filtered
A4D1U4	Filtered	Filtered	Filtered
A4D1W8;Q9UM22	81368.9	105308	165372
A4D212;Q8N201	9906.02	31769.6	Filtered
A4D2Q0;E9PHI4	61520.4	114502	84712.4
A4D7V1;B8ZZU6;E9PBF9;E9PEK8;F5H629;G8JLM5;H7C2N6;P15336;Q8TAR1	Filtered	13685.7	16204.1
A4PB68;B0QZ55;H7BY62;Q3T8J9;Q3T8J9-2;Q3T8J9-3;Q9H869-2;Q9H869-3;Q9H869-5	Filtered	5055.18	Filtered
A5D8V6;F5H3K0;F5H4Q5	Filtered	Filtered	Filtered
A5PLL7;Q5TGE1;Q5TGE2	Filtered	Filtered	Filtered
A5PLN9;A5PLN9-2;A5PLN9-4;A5PLN9-5;A5PLN9-7;F5GXC3	Filtered	Filtered	Filtered
A5YKK6	105310	56286.1	29066.5
A6H8M8;B0UZ83;B0V2C8;F8VSI2;F8VW91;F8VZD8;P0C0L4;P0C0L5;Q5JNX2	Filtered	Filtered	Filtered
A6H8Z7;Q6UWP7	215477	204078	273360
A6NCB2;A6NMG4;Q9BX74	Filtered	Filtered	Filtered
A6NCD9;A6NKJ2;F8W8M4;F8WAB0;F8WAB1;H0Y3K7;O14639;O14639-2;O14639-3;O14639-4;O14639-5;Q5JVV3;Q5T6N2;Q5T6N4	14289.5	Filtered	Filtered
A6NCE7;H3BTL1;Q9GZQ8	147498	41463.5	72128.3
A6NCI0;Q9Y6G3	404379	346427	342833
A6NCN2	Filtered	Filtered	Filtered
A6NCZ0;C9JFX6;Q9BUJ0	Filtered	Filtered	Filtered
A6NCZ6;Q9BWM7	348123	638183	388873
A6NDG6	Filtered	Filtered	Filtered
A6NDJ8;Q86YS6	53883.7	Filtered	Filtered
A6NDN0;O43617	47284.9	83188.6	84167.6
A6NDS2;Q86WR7;Q86WR7-2	Filtered	Filtered	Filtered
A6NDU8	Filtered	Filtered	Filtered
A6NDW3;B4DKL4;E9PHD4;Q86X29	13047.1	39075.8	31535.6
A6NDW6;H0YDD3;H0YDQ1;Q9BVK2	Filtered	Filtered	Filtered
A6NDY9	54118	49070.2	49890
A6NE20;E7EQL6;F8WB49;O43272;O43272-1;O43272-2	22397.4	19927.5	16195.1
A6NED2;G3V2I3	Filtered	Filtered	Filtered
A6NEM2	264347	473746	407070
A6NEP9;H7BXY6;Q8NG11;Q8NG11-2;Q8NG11-3	Filtered	Filtered	Filtered
A6NES3;E9PL33;E9PM05;E9PS58;O14681	215010	380181	157036
A6NF48;Q9Y2X9	3995.7	14354.2	15102.8
A6NFN2;F5H1G9;F8WA55;F8WA56;Q8IZP0;Q8IZP0-10;Q8IZP0-2;Q8IZP0-3;Q8IZP0-4;Q8IZP0-5;Q8IZP0-6;Q8IZP0-7;Q8IZP0-8;Q8IZP0-9	97190.9	100633	129648
A6NFN6;Q9ULL5;Q9ULL5-2;Q9ULL5-3	Filtered	Filtered	Filtered
A6NFQ9;A6NMH6;F6W7K9;F8W8I8;Q92599;Q92599-2	73044.9	107791	111101
A6NFV8;Q96EV8	Filtered	Filtered	Filtered
A6NFX8;Q9UKK9	71855.6	72324.4	104258
A6NFY7	248127	221206	187646
A6NG10;B4DFG2;E7EX86;Q969T9	Filtered	Filtered	Filtered
A6NG79;Q92733	14822.6	16965.6	18029.1
A6NGJ4;Q7Z7H8	2.97004e+06	2.06915e+06	1.92754e+06
A6NGW1;O95070	Filtered	Filtered	Filtered
A6NHB5;A6NHN7;Q14202;Q14202-2	25397.1	51657.5	37527
A6NHF2;B4DLJ9;F8W1Q3;P43251	Filtered	Filtered	Filtered
A6NHR9	110775	261176	238063
A6NHS7	511810	385988	552655
A6NI00;P63092;P63092-2;P63092-3	399388	326399	318604
A6NI04;B4E3U2;E9PJM3;E9PL46;Q9UK99;Q9UK99-2;Q9UK99-3	Filtered	Filtered	Filtered
A6NI12;C9JDH3;H7BXQ4;H7BYF2;Q5JRG1;Q9BVL2;Q9BVL2-2	36138.1	40718.5	50140.7
A6NIG5;Q969Y2;Q969Y2-2;Q969Y2-3	1.64296e+06	1179968	1.32121e+06
A6NIH7	Filtered	Filtered	Filtered
A6NIR2;Q9Y547	Filtered	Filtered	Filtered
A6NIW1;P14209	25017.6	20693.6	24970.1
A6NIW2;Q5JSL3	Filtered	23733.5	17661.8
A6NJ78	386431	267460	233716
A6NJD7;Q8IWP9	Filtered	Filtered	Filtered
A6NJF5;Q9UI36;Q9UI36-2	Filtered	32602.3	20369.3
A6NJK7;Q76FK4;Q76FK4-2;Q76FK4-3;Q76FK4-4	Filtered	26749.6	Filtered
A6NJM0;B1AKC9;P29323;P29323-2;P29323-3	Filtered	Filtered	Filtered
A6NJP5;P32189;P32189-1;P32189-2	790975	1.118e+06	725630
A6NJX0;A8K7N4;Q9H4F1	Filtered	296533	Filtered
A6NJZ6;O75054-2	Filtered	Filtered	Filtered
A6NJZ9;Q8WTT2	26629.4	35793.1	38199.9
A6NK58	339913	361435	279546
A6NKD9	29128.5	13946.1	20994.7
A6NKF1;F8WC89	Filtered	Filtered	Filtered
A6NKF9;B7ZAQ6;B7ZAQ6-2;B7ZAQ6-3;P0CG08	25679.2	92746.7	60084.6
A6NLH6;Q9P003	198797	239356	220463
A6NMI8;Q9BX70;Q9BX70-2;Q9H0C5	Filtered	Filtered	Filtered
A6NML8;C9J6U3;F5H7I1;O60879;O60879-2;O60879-3	Filtered	Filtered	Filtered
A6NMN0;P46020;P46020-2	Filtered	Filtered	Filtered
A6NMQ1;P09884	47246.5	78134.9	84132.6
A6NN50;O75147	Filtered	Filtered	Filtered
A6NNI4;B4DPP0;G8JLH6;P21926	Filtered	8443.59	Filtered
A6NNL5	226978	143972	145779
A6NNV6;O95229	314833	308227	339452
A6PVM9;F5GYC9;Q9BQI0;Q9BQI0-2;Q9BQI0-3	Filtered	Filtered	Filtered
A6PVN5;Q15257;Q15257-2;Q15257-3	Filtered	23685.1	32271
A6PVT6;A8MSQ5;F5GZV0;F5H083;F8WEA4;Q9NR82;Q9NR82-2;Q9NR82-3;Q9NR82-4	Filtered	Filtered	Filtered
A6PW55;Q15906	Filtered	125013	75371.3
A6PW57;Q99755-2;Q99755-3	106590	Filtered	37533.5
A6PWM2;Q6UXH1;Q6UXH1-2;Q6UXH1-3;Q6UXH1-4;Q6UXH1-5;Q6UXH1-6	Filtered	Filtered	34161.2
A6QRH6;P98173;Q5HY75	Filtered	17780	Filtered
A7E2V4;A7E2V4-3;A7E2V4-4;A7E2V4-5	Filtered	Filtered	Filtered
A7MAP0;Q9ULV4	153167	127967	185685
A8CG34	37105.5	88981	68607.3
A8CTX8;A8CTY3;B4DTM2;E7ERJ0	12712.9	8868.49	11287.7
A8K040	24937.1	14050.7	23041.7
A8K092	97308280	70161000	51274880
A8K1B6	116124	138485	133520
A8K1C9;Q96LT9	Filtered	Filtered	Filtered
A8K2U0;F5H2W3	Filtered	Filtered	Filtered
A8K2U1;F5H225;Q5NDL2;Q5NDL2-2;Q5NDL2-3	Filtered	6950.26	Filtered
A8K327;B4E0V4;Q9UQ49	Filtered	Filtered	Filtered
A8K3Z3;P62195	125034	94177.9	132551
A8K7Q2	Filtered	Filtered	Filtered
A8MPX7;F5GWL7;Q9H5V9	Filtered	14650.4	20140.4
A8MPX9;O75140;O75140-3;O75140-4;O75140-8	Filtered	Filtered	Filtered
A8MQB8;G3V0J0;Q06787-2	Filtered	2978.89	3980.07
A8MST6;E7ERV6;E9PHX5;Q5JTW2;Q5JTW2-2;Q5JTW2-3	4488068	1.96714e+06	2.99872e+06
A8MT24;E5RGQ3;Q9H446	Filtered	Filtered	Filtered
A8MT69;A8MT69-2;A8MT69-3	Filtered	Filtered	Filtered
A8MT70;A8MT70-2;F2Z370	347284	234319	304933
A8MTC3;C9JWB0;Q7Z5J4;Q7Z5J4-2	26501.4	39612.2	44495.6
A8MTG3;E1P660;H0Y3M2;O43670;O43670-2	66522.3	84664.2	95262.6
A8MTG8;B7Z441;C9JAA7;C9JBY2;F5GWK4;G5E9V6;Q8IUR7;Q8IUR7-2;Q8IUR7-6	2.78322e+06	3.92164e+06	1.94919e+06
A8MTH6;C9J0K6;P30626	138696	141912	179971
A8MTN3;F5H1T9;F5H6S0;P0C7H8;Q9BYR9;Q9BYU5	Filtered	Filtered	Filtered
A8MTT3	270632	180721	247665
A8MTY9;O14972	Filtered	827682	Filtered
A8MU17;F5H2B2;F5H6B6;F5H8A0;Q86TN4;Q86TN4-2	Filtered	Filtered	Filtered
A8MU27;A8MUA9;B4DUW4;P55854	3254072	2.21094e+06	5.62542e+06
A8MU44;Q9UJC3	Filtered	Filtered	Filtered
A8MU99;Q9NRP7;Q9NRP7-2	22461.3	26936.8	32077.6
A8MUB1;P68366	Filtered	Filtered	Filtered
A8MUM1;Q53HC9	Filtered	Filtered	Filtered
A8MUS2	350279	Filtered	258649
A8MUW5	40950.4	67548.1	74234.6
A8MV58;Q16643;Q16643-2	89562.4	51044.8	111267
A8MV89;Q5M775;Q5M775-2;Q5M775-3;Q5M775-4;Q5M775-5	Filtered	Filtered	Filtered
A8MVZ6;F8W113;Q96G01;Q96G01-3	Filtered	Filtered	Filtered
A8MWB4;B7Z1T4;O43739;O43739-2;Q15438;Q15438-2;Q99418;Q99418-2	Filtered	Filtered	Filtered
A8MWD3;O15371	58850.6	90856.6	106834
A8MWD9;F5H013;P62308;Q49AN9	124493	151564	137465
A8MWK3;P19022	46037.7	38584	45646.1
A8MWX0;Q96HR9	Filtered	80611	Filtered
A8MWY0	Filtered	Filtered	Filtered
A8MWY4;Q13029;Q13029-2;Q13029-3;Q5THJ1	2435.15	2002.77	2571.63
A8MX09;O94967;O94967-2;O94967-3	Filtered	Filtered	Filtered
A8MXF4;C9JX84;E7ET33;Q06033;Q06033-2	35637.6	47213	349001
A8MXP7;E9PAJ8;Q6NUT3;Q6NUT3-2	Filtered	Filtered	303402
A8MXP9;P43243	164229	192629	249149
A8MXQ1;P53801	173581	167434	160728
A8MXR0;Q9Y608;Q9Y608-2;Q9Y608-4	Filtered	4407.14	8085.85
A8MXV4	2389841	2686234	2.69274e+06
A8MYC7;B1AMF0;Q8N2K1;Q8N2K1-2	Filtered	Filtered	Filtered
A8MYH2;B7WPL9;D6RBU4;D6RFZ8;E9PGM8;F8W9A8;H7BXU5;O43314;O43314-2;Q6PFW1;Q6PFW1-2;Q6PFW1-3;Q6PFW1-4;Q6PFW1-5;Q6PFW1-6;Q6PFW1-7	Filtered	Filtered	Filtered
A8MYQ9;Q9BZG1	154651	32330.8	51677.8
A8MYY3;Q9UPQ9-1	Filtered	2930.57	Filtered
A8MZF9;P55039	74759.9	17914.7	52228.6
A9C4B9;B0V3J0;E7EQB3;Q9BSV6	Filtered	Filtered	Filtered
A9X3U0;Q96GF1	16341	25506.2	26985.6
A9Z1X7;E9PCT1;Q8IYB3;Q8IYB3-2	28651.9	50482.6	49678.8
B0AZR7;Q13303;Q13303-2	Filtered	Filtered	Filtered
B0AZS3;B7Z5Z0;B7Z8R1;B7Z9U0;Q9UFF9	Filtered	506678	522558
B0AZS9;H0YBC7;H7BXD2;O60238	216849	155583	148694
B0QXZ6;O95503	Filtered	12205.4	Filtered
B0QXZ8;B0QXZ9;Q9UGU5	4388.42	19121.6	18360.7
B0QY29;Q9NWS6	Filtered	Filtered	Filtered
B0QY62;Q9UH99	29614.7	148967	62403
B0QY89;Q9Y262	72438.1	63453.7	89142.7
B0QY95;Q9NQG6	241560	192440	129879
B0QYK0;B0QYK1;Q01844;Q01844-3;Q01844-5	176568	254903	314183
B0QYM8;Q9HBI1;Q9HBI1-2	Filtered	Filtered	Filtered
B0QYW5;B4DU97;F5GYD1;O43808	267672	114055	203750
B0QZ44;P41229;P41229-2	Filtered	Filtered	Filtered
B0QZ88;Q9H7B4	Filtered	Filtered	Filtered
B0QZE2;B7Z293;B7Z3Z1;E7ENI9;F5H449;F6UH50;Q15326;Q2LD45;Q5BJG6;Q5VUI0	Filtered	Filtered	Filtered
B0S7Q4;F8VSH7;F8VX15;H7C4U4;H7C5B5;H7C5D3;Q0P5T2;Q5SQH8;Q5SQH8-2;Q5SQH8-3	76300.8	50707.7	48959.9
B0S872;G8JLE1;Q9UMR5	323125	383606	452579
B0S8I7;Q14657	Filtered	9103.95	10571.8
B0UX83;G3V1Z5;P46379;P46379-2;P46379-3	53493.7	65580.4	58419.1
B0UZZ8	134995	45521.1	33811.9
B0V043;P26640	94002.2	121332	137436
B0YJ65;Q86UU1;Q86UU1-2;Q86UU1-3	Filtered	Filtered	Filtered
B1AH87;P30536	346776	375798	327531
B1AH89;Q14166	22256.6	58597.4	56053.5
B1AHH4;B1AHH5;B1AHH6;Q9H7Q0;Q9UIA0	22124.2	29885.2	23635.2
B1AHL2;P23142-4	Filtered	Filtered	Filtered
B1AHQ6;Q9NSP4;Q9NSP4-3	Filtered	Filtered	Filtered
B1AHR1;B1AHR2;B7Z686;Q9UH03;Q9UH03-2	Filtered	Filtered	Filtered
B1AJY5;B1AJY7;O75832	785174	259045	227406
B1AK13;P35914	1739437	1.65909e+06	1.87564e+06
B1AK44;Q9UI95	Filtered	Filtered	Filtered
B1AK51	18133.6	38964.7	22623.2
B1AK64;Q9HAF1;Q9HAF1-2;Q9HAF1-3	Filtered	71151.4	69003.1
B1AK87;B1AK88;E7EQ40;P47756-2	113420	92048.8	137709
B1AKB1;B1AKB2;B1AKB4;P19484	Filtered	Filtered	Filtered
B1AKC7;F8W755;Q9UJF2	Filtered	Filtered	Filtered
B1AKD8;Q5TZA2	Filtered	Filtered	Filtered
B1AKJ5;O43847;O43847-2	10604.1	7654.34	13578.1
B1AKN3;Q9P2R6;Q9P2R6-2	Filtered	Filtered	Filtered
B1AKR6;Q9NP97	120862	108819	127570
B1AKT6;Q9Y483	75306.3	192911	314389
B1AKU4;B1AKU5;F5H591;Q92845	Filtered	Filtered	Filtered
B1ALH6;O14832	169167	73093.5	147729
B1ALK7;B7Z6G2;Q14155-1;Q14155-5	35290.5	43255.2	59431.8
B1ALM5;Q9P0T7	84877.1	106540	127662
B1ALU3;O95490;O95490-2;O95490-5;O95490-6;O95490-7	43246.9	35386.2	35560.7
B1AM27;F5GZ07;F8W8M9;O14795	Filtered	Filtered	Filtered
B1AMS2;F5H1J5;Q14141;Q14141-2;Q14141-4	55339.8	15575.2	29562.4
B1AMV7	96265.7	83534.6	Filtered
B1AMW1;P19256;P19256-2;P19256-3	7949.58	Filtered	26615.4
B1AN99;F8W7P3;P35030;P35030-2;P35030-3;P35030-4	Filtered	Filtered	Filtered
B1ANH0;Q16774-2	1.58146e+06	1.21633e+06	1316077
B1ANR0;Q13310;Q13310-2;Q13310-3	214883	224698	244742
B1AP13;E9PSH2;H3BLV0;P08174;P08174-2;Q14UF4;Q14UF5;Q14UF6	92017	39164.5	139508
B1AP58;P15169	8470.55	Filtered	14254.2
B1APM4;P35610	381151	124459	340977
B1APS8;Q96S38	Filtered	Filtered	Filtered
B1APY4	Filtered	Filtered	Filtered
B1AQP1;E9PME6;P22415;Q7Z5Y1	32168.4	55206.3	62940.3
B1AT46;Q9Y692;Q9Y692-2	98978	101591	92842
B1AVT0;P49760;P49760-3	Filtered	Filtered	Filtered
B1AVU8;P07602	2.19205e+06	1.69415e+06	3.35719e+06
B1AZV3;F5H648;Q03518	Filtered	35083.3	30284.7
B1Q2X3;P21675;P21675-2;P21675-3;P21675-4	Filtered	Filtered	Filtered
B2CI53;B5M453;D3K174;E9PDL9	27532.3	28706.4	21496.3
B2R603;P07910	77163.7	84811.2	89187.8
B2RD65;Q5PSV4	16329.5	39491.1	43303.2
B2RXF5	Filtered	Filtered	Filtered
B2WTI4;Q6NYC1;Q6NYC1-2;Q6NYC1-3	Filtered	Filtered	31857.8
B3KMX7;B4DV65;F5H1A6;H0YKU8;H0YL81;H0YLB7;H0YLG0;H0YMI4;Q6JHV3;Q9Y6I4	Filtered	47137.2	55020.3
B3KNT8;F5H4R6;F8VY35;H0YIV4;P55209	418112	276584	544952
B3KP14;F5H5I6;H0Y8R1;H0YAK1;Q12849	11286614	3237139	5988216
B3KP49;B4DID0;B4DQH9;Q6VN20	Filtered	Filtered	Filtered
B3KP61;C9K000;P31751;Q0VAN0	Filtered	11204.4	Filtered
B3KPJ4;Q8IXK0;Q8IXK0-2;Q8IXK0-4;Q8IXK0-5	39002.6	57003.9	52086.8
B3KPS6	Filtered	Filtered	Filtered
B3KQ29	Filtered	Filtered	Filtered
B3KQW7;I3L1H5;Q9BZG8;Q9BZG8-2;Q9BZG8-3	Filtered	Filtered	Filtered
B3KR41;Q9Y6D9	317591	16717.8	Filtered
B3KRD1;B7Z4D2;Q9NX95;Q9NX95-2;Q9NX95-3;Q9NX95-4;Q9NX95-5	Filtered	46463.1	24620.4
B3KRF7;E9PC66;P17029	Filtered	27016.3	29878.6
B3KRJ9;Q8WXA9-2	2459.31	97734.4	112329
B3KRR0;P07992;P07992-3	Filtered	Filtered	Filtered
B3KRS5;Q92769	175887	224758	95697.4
B3KRY5;Q6NZI2	Filtered	Filtered	Filtered
B3KS61;O60725	Filtered	Filtered	Filtered
B3KSH1;B4DMT5;O00303	121978	126599	174469
B3KSI9;Q9NQ48	Filtered	Filtered	23488.3
B3KSY9;O75925	Filtered	Filtered	Filtered
B3KT25;Q96S55;Q96S55-2	Filtered	Filtered	Filtered
B3KTC7;P49959	38302.5	52739.8	51395
B3KTH8;P20265;P20265-2;P20265-3	15084.2	19603.6	19966.2
B3KTI1;P04745;P04746;P19961	7619.83	8262.56	Filtered
B3KTM8;H0YMJ0;Q9UBU8-2	28400.5	67711	55732.7
B3KTR6;Q9BRK3;Q9BRK3-2	Filtered	Filtered	Filtered
B3KU92;Q6P2P2;Q6P2P2-2	Filtered	Filtered	Filtered
B3KUB4;O43570;O43570-2	Filtered	Filtered	Filtered
B3KUV7;P37287;P37287-2;P37287-3	Filtered	Filtered	Filtered
B3KV94;F5H7Y2;Q9UGL1;Q9UGL1-2	Filtered	Filtered	Filtered
B3KVH8;I3L4Q4;Q9BUL5	Filtered	232171	Filtered
B3KVR1;E7ENP4;P14678;P14678-2;P14678-3;P63162	294550	437346	438651
B3KVU0;H7BZK4;Q8WUM9	Filtered	Filtered	Filtered
B3KVZ3;H0Y9E6;Q9H3R5	8085.8	32252.7	Filtered
B3KXE0;P32780	757769	45214.9	335103
B3KXK7;F8VZA2;Q6P1Q0	550312	434562	340702
B3KXS5;P36776	14942055	15574781	14141261
B3KXW5;O43747;O43747-2	42336.3	38864.5	43926.8
B3KXX3;Q9UHW9;Q9UHW9-2;Q9UHW9-3;Q9UHW9-4;Q9UHW9-5;Q9UHW9-6	Filtered	Filtered	Filtered
B3KY39;Q8TCG2	11100.1	12099.5	Filtered
B3KY94;H3BTV1;O14735	72711	119484	102157
B3KYA7;Q13188	24597.6	38386.1	28902.5
B3V0L1;F8WCT1;Q66PJ3;Q66PJ3-2;Q66PJ3-3	39984	23580.8	18204.5
B4DDD1;Q8IZ73	46281.3	24258.3	29594.1
B4DDF4;B4DUT8;Q99439;Q99439-2	Filtered	Filtered	Filtered
B4DDF7	265942	329269	421054
B4DDG0;B4DEA5;B4DEB8;B4E171;P41732	Filtered	Filtered	Filtered
B4DDG7;Q9BXS5;Q9BXS5-2	48657.3	Filtered	66091.6
B4DDK9;Q10469	124221	143090	261258
B4DDP2;E7EV43;Q6NW29	Filtered	Filtered	Filtered
B4DDR3	Filtered	Filtered	Filtered
B4DDT2;O75191	Filtered	Filtered	Filtered
B4DDT7;F8VYY9;F8W9D1;H0YHF8;P54619	1.31358e+06	Filtered	Filtered
B4DDV1;Q13325	6694.33	17148.8	9406.65
B4DDV3;Q8N6T7;Q8N6T7-2;Q8N6T7-4	Filtered	43517.6	49452.5
B4DDV7;B7ZM03;C9J121;C9J2P9;Q75N03	Filtered	Filtered	Filtered
B4DDY7;B4DNN0;Q5T4K2;Q5T4K3;Q5T4K4;Q9NY26	Filtered	Filtered	12528.2
B4DE11;E7EW45;P78381;P78381-2	Filtered	Filtered	Filtered
B4DE98	Filtered	6182.4	Filtered
B4DEH8;G3V4T2	Filtered	Filtered	Filtered
B4DEI4;B4DKT0;Q9H8Y8	21197.6	49402.6	47790
B4DEN4;E7EV05;E9PFU9;Q8WV99;Q8WV99-2	980358	1.66663e+06	1.70343e+06
B4DEX5;C9JA75;E9PDK8;H0Y4B0;O43414;O43414-2;O43414-3	201555	144853	144816
B4DF08;B4DJB7;B7WPA5;B8ZZN1;Q96CS7;Q96CS7-2;Q96CS7-3	Filtered	Filtered	Filtered
B4DF14;P43003;P43003-2	68047	86949.7	89790.2
B4DF64;Q68CZ6	Filtered	10365.3	Filtered
B4DFH6	Filtered	453619	551148
B4DFI4;E9PQZ8;H0YEM7;O75143;O75143-2;O75143-3	Filtered	Filtered	Filtered
B4DFQ6;B4DHT5;Q96CM8	635622	1.00979e+06	857370
B4DFR4;B4DGM3;C0IMW5;Q969G3;Q969G3-2	58230.7	87444.1	96631.2
B4DFT0;H3BPN6;H3BT78;Q6PHR2;Q6PHR2-2;Q6PHR2-3	Filtered	Filtered	Filtered
B4DFW2;P16035	Filtered	Filtered	Filtered
B4DG42;C9J5M0;C9JC07;C9JJV6;C9JZL8;Q96S97	Filtered	29103.8	19178.8
B4DG62;P19367	1626527	2644504	2.21739e+06
B4DGI9;E9PGY0;F5H6Z6;Q99081;Q99081-3	Filtered	Filtered	Filtered
B4DGM2;Q9H875	Filtered	Filtered	Filtered
B4DGM4;Q9NX70	Filtered	7223.08	7906.87
B4DGR6;Q8NEZ3	Filtered	Filtered	Filtered
B4DGU4;P35222	126037	83348.5	110822
B4DGX2;P48426	26534.7	27387.1	24617.1
B4DH44;P45985;P45985-2	Filtered	Filtered	Filtered
B4DH52;P78347;P78347-2;P78347-3;P78347-4	597806	1.02251e+06	1.1628e+06
B4DH53;Q66K74	22565.8	68363.9	49407
B4DH70;Q9UKB1;Q9UKB1-2;Q9UKB1-3	Filtered	Filtered	Filtered
B4DHE8;Q96DH6;Q96DH6-2	Filtered	Filtered	Filtered
B4DHJ7;Q12983	34409.1	17294.9	30401.5
B4DHN0;P28482	Filtered	57004.4	59159.8
B4DHP5	1.14944e+06	1.29789e+06	1.85539e+06
B4DHY4;B4DT77;P20073;P20073-2	7229.36	238166	197230
B4DI13;B7Z821;E9PCU2;H0Y3I0;H0Y818;P40692	Filtered	Filtered	Filtered
B4DI41;Q9UIS9;Q9UIS9-4;Q9UIS9-5;Q9UIS9-7;Q9UIS9-8;Q9UIS9-9	30204.1	66173.5	50599.6
B4DI61;O00622	Filtered	Filtered	Filtered
B4DII8;P05067;P05067-8	101186	88629.2	94335.1
B4DIJ9;Q59FJ7	Filtered	Filtered	Filtered
B4DIQ0;O60942	13645.5	41001.2	36181.5
B4DIR7;Q99504	Filtered	4668.3	5999.65
B4DIV9;B7Z3B1;Q9Y2E8;Q9Y2E8-2	Filtered	Filtered	Filtered
B4DJJ3;Q6NXT6;Q6NXT6-2	Filtered	22972.6	Filtered
B4DJL6;B4DVD5;B4DVT3;H3BRY6;Q96SY0;Q96SY0-3	Filtered	10217.6	9377.87
B4DJN2;B4DMK1;O95258;O95258-2	155458	76810.6	70794.9
B4DJP7;P62318	190677	263140	271143
B4DJU2;D3DWC4;H7C1W3;Q86VZ5;Q86VZ5-2	Filtered	Filtered	Filtered
B4DJV2;O75390	65126988	50518392	50127392
B4DK30;Q15029	120600	155546	180460
B4DK60;Q8TDN4;Q8TDN4-2	Filtered	Filtered	Filtered
B4DK95;Q9C0D3	7000.37	5725.48	Filtered
B4DKB9;E7EWT6;Q9P1Z2;Q9P1Z2-2;Q9P1Z2-3;Q9P1Z2-4	Filtered	Filtered	Filtered
B4DKC2;Q7L099;Q7L099-2;Q7L099-3;Q7L099-4	Filtered	Filtered	Filtered
B4DKJ1;Q14CX5	Filtered	Filtered	Filtered
B4DKK6	64370.2	159357	162776
B4DKR6;O15234	Filtered	3605.64	Filtered
B4DKX7;Q8IW45;Q8IW45-2	212171	177746	219188
B4DKY1;P49589;P49589-2;P49589-3	Filtered	38975.4	56759.7
B4DL13;Q9UL03;Q9UL03-3	Filtered	Filtered	Filtered
B4DL14	290008	293551	220815
B4DL54;B4E1A0;H0YHI0;P49356	Filtered	Filtered	Filtered
B4DLC0	Filtered	Filtered	253202
B4DLE8	4831.5	5921.83	11270.7
B4DLH4;Q9H910	79029.4	81909.4	106075
B4DLP8;B4DV66;Q9BWT1;Q9BWT1-2;Q9BWT1-3	Filtered	Filtered	Filtered
B4DLP9;Q7KYR7	Filtered	29392.3	26846.1
B4DLT4;F6UYM1;P23443;P23443-2	Filtered	Filtered	Filtered
B4DLX8;C9J453;O15344;O15344-2	Filtered	Filtered	Filtered
B4DLZ9;F8WB55;Q5TDE7;Q5TDE8;Q5VTB9	Filtered	Filtered	Filtered
B4DM24;C9J9E2;E7ETR1;Q8NCB2;Q8NCB2-2;Q8NCB2-3	Filtered	Filtered	Filtered
B4DMI6;Q5MNZ6	Filtered	Filtered	Filtered
B4DMU0;P32322	2.01107e+06	1.51246e+06	1.80086e+06
B4DMV3;H7C5G1;Q2TAA2	41858.4	36958.7	34541.5
B4DN34;Q96GC5	2.95607e+06	2.02998e+06	2.29298e+06
B4DN50;P17302	83730.4	137133	62669.6
B4DN67;Q5W0F9;Q5W0G0;Q96J84;Q96J84-2;Q96J84-3	20727.6	15430.6	16397.1
B4DN88;E7ETU5;P29558;P29558-2	9130.9	Filtered	18909.5
B4DNH5;P58317	Filtered	Filtered	Filtered
B4DNI1;C9K0U0;Q7Z422;Q7Z422-2;Q7Z422-3;Q7Z422-4	Filtered	Filtered	Filtered
B4DNJ6;Q9Y3F4	103215	60327.3	121270
B4DNR3;F8W9U3;Q96IU4	9664	11413.4	9168.79
B4DNX9;Q14592	Filtered	Filtered	Filtered
B4DP11;Q15185	464926	379820	663719
B4DP24;Q9BW60	7099.67	10939.1	8841.42
B4DP27;Q15363	72754.8	85786.4	70307.8
B4DP36;E7ENK0;E9PBE5;Q13137	Filtered	Filtered	Filtered
B4DPC1;F5H869;H0Y6D8;P20226	Filtered	Filtered	Filtered
B4DPR4;C9J494;Q9H000	Filtered	26173.8	Filtered
B4DPR9;Q99551	344688	221824	206375
B4DPV8;Q8NC54	47667.1	33635.6	Filtered
B4DPW7;E7EQF4;E9PDG2;G3XAB1;H7C3C0;Q9HBG6;Q9HBG6-2;Q9HBG6-3;Q9HBG6-4	Filtered	Filtered	Filtered
B4DPY8;F6TTN0;O94842	21624.5	27739.4	46498.3
B4DQ14;Q9BY44	41783.3	43838.7	46121.3
B4DQ19	58526.8	55235	90705.8
B4DQ42;E7ENF4;Q9HC62	Filtered	6993753	5.95403e+06
B4DQ47	Filtered	Filtered	Filtered
B4DQE4;P10588	Filtered	Filtered	159370
B4DQI6;B4DUA9;Q13595	79856	67249.9	82509.1
B4DQJ8;P52209	158643	131510	85805
B4DQK0;Q96BI3	Filtered	215055	Filtered
B4DQL2;Q9HD23;Q9HD23-2	295785	150575	163568
B4DQM7;Q15036	Filtered	Filtered	Filtered
B4DQQ4	215148	Filtered	190146
B4DR12;E9PB19;O60291;O60291-2;O60291-3;O60291-4	Filtered	Filtered	Filtered
B4DR21;Q14703	Filtered	Filtered	Filtered
B4DR31	18159.5	16217.6	21639.2
B4DR61;P61619	202111	194029	171329
B4DR70;P35637;P35637-2	812094	1.09623e+06	1533151
B4DR80;Q9Y6E0;Q9Y6E0-2	64655.3	68965.6	85352.7
B4DR87;Q02809	298712	481015	1.03284e+06
B4DRD7	23404.7	26949.1	27504.7
B4DRF9;P18846	Filtered	66217.7	84076.9
B4DRL5;Q5JVZ5;Q96JJ3	66015.9	38095.8	36852.8
B4DRL9;P24386	Filtered	Filtered	Filtered
B4DRN7;F5H2A1;Q86YS7;Q86YS7-2	173649	Filtered	Filtered
B4DRN8;Q2TB82;Q5W0Z9;Q5W0Z9-3	Filtered	Filtered	145677
B4DRT2;Q92552	4572654	2.87747e+06	3420987
B4DRY3;Q7L9L4;Q9H8S9	36444	12419.8	31671.6
B4DS44;Q8N1B4	Filtered	Filtered	Filtered
B4DS52;C9JY70;H0Y997;Q96J42;Q96J42-2	164645	173587	181414
B4DS80;F5GZN7;Q86V97;Q8WVZ9	87471.3	Filtered	Filtered
B4DS82;Q14457	Filtered	Filtered	769083
B4DSD4;Q5T8U9;Q5T8V1;Q8N4J0	Filtered	Filtered	Filtered
B4DSM5;G3XAG1;Q96ME7	58161.8	238118	195064
B4DSN4;E7EML5;E7ET57;Q8NHM5;Q8NHM5-2;Q8NHM5-3;Q8NHM5-4	Filtered	71752.9	50715.5
B4DSS3;F5H5A3;Q8IVH8;Q8IVH8-2;Q8IVH8-3	11158.6	Filtered	9611.99
B4DST0;O43463	Filtered	Filtered	Filtered
B4DT16;F5H2Y4;Q9H165;Q9H165-2;Q9H165-6	Filtered	Filtered	Filtered
B4DT31	Filtered	Filtered	Filtered
B4DT35;Q7Z3B4	37775	27664.7	80407.5
B4DT67;Q9NUQ6;Q9NUQ6-2	Filtered	Filtered	Filtered
B4DT74;I3L295;O75352;Q1HDL3;Q96K24;Q9H3L2	54888	55213.9	60615.3
B4DTA3;Q96AG3	155237	178820	130378
B4DTC3;H7BXN2;Q14103-2;Q14103-4	Filtered	Filtered	Filtered
B4DTE8;C9J7K9;O15162	2458.91	Filtered	3347864
B4DTG2;P26641	548943	582639	588499
B4DTG6;Q8ND56;Q8ND56-2	45311	50496.7	71920
B4DTU0;Q13740;Q13740-2	89332.8	88434	103498
B4DTZ6;P19634;Q5TBB2;Q5TBB3	Filtered	Filtered	Filtered
B4DTZ7;Q68DH5	Filtered	5324.39	Filtered
B4DUB1;H0Y3K1;Q9BWU1;Q9BWU1-2	21293.3	1.09355e+06	14060
B4DUD5;E7EWR4;P33240;P33240-2	36444.9	70279	92652.8
B4DUE9;F5GY47;Q13530	Filtered	Filtered	Filtered
B4DUS5;Q96B01;Q96B01-2;Q96B01-3	Filtered	Filtered	Filtered
B4DV38;E9PC61;H3BQM0;Q8NDF8	Filtered	Filtered	Filtered
B4DV79;F8W8C8;P55884;P55884-2	99724.3	103860	115718
B4DVE7;E9PDK5;P50995	444133	439989	327768
B4DVN1;O75190	Filtered	Filtered	Filtered
B4DVP2;Q9Y478	4667.98	Filtered	Filtered
B4DVQ4;Q86Y37;Q86Y37-4	Filtered	Filtered	Filtered
B4DVQ5;Q99613	48749.5	53399.9	65263.8
B4DVZ5;Q92791	58301	50795.3	39407.2
B4DW92;Q86WQ0	Filtered	Filtered	Filtered
B4DWD7;Q53TN4	Filtered	Filtered	Filtered
B4DWI1;Q9UJ83	3.82941e+06	1.35151e+06	2.86015e+06
B4DWS0;C9JGX3;Q96F24;Q96F24-2	Filtered	Filtered	Filtered
B4DWT2;Q5JW54;Q5JW58;Q9H410;Q9H410-2;Q9H410-3	Filtered	4206.44	2421.44
B4DWW1;P40616	76397	75492.5	64116
B4DX32;F5GXB3;O60870	Filtered	Filtered	Filtered
B4DX68;Q96KB5	Filtered	Filtered	Filtered
B4DXA1;I3L3Y9;I3L4X7;Q13227	Filtered	Filtered	Filtered
B4DXL3;H3BPM8;Q13286;Q13286-2;Q13286-3;Q13286-4	38078.2	17338.5	30522.4
B4DXP5	94837.5	90577.2	153861
B4DXR9;B4E159;D6RB60;D6RGC2;D6RIY0;E5RGH0;E9PN20;F5H663;Q15928;Q3SXZ3;Q8IYB9;Q8TB69	Filtered	Filtered	Filtered
B4DY08	3.31216e+06	3.00648e+06	6.5346e+06
B4DY26;F8W1R9;P36897;P36897-2;P36897-3	Filtered	Filtered	Filtered
B4DY38;E7EPF0;Q9NP64;Q9NP64-2	Filtered	Filtered	Filtered
B4DY81;Q9UNS2	31547.6	36782.2	48208.3
B4DYB4;Q8NFH5	278178	201025	259408
B4DYM7;Q6UVJ0	9451.62	9858.1	9847.94
B4DZC3;Q9H0D6;Q9H0D6-2	37358.5	68839	71178.8
B4DZI8;P35606	60635	65014.9	73741.2
B4DZM7;E7ERJ8;E9PFK9;H7BYE7;Q3HKR1;Q9UJ41;Q9UJ41-2;Q9UJ41-3	187187	Filtered	Filtered
B4DZV1;C9K053;F5H175;G5E9H3;Q49AM3;Q49AM3-2	Filtered	Filtered	Filtered
B4DZX6;G8JLA9;H7BYZ6;Q9Y575;Q9Y575-2	Filtered	Filtered	Filtered
B4E040;P11234	83930.1	67492.8	62217.5
B4E0K5;Q16539	Filtered	10187	26229.9
B4E0K9;G5E928;O00754	354283	221809	318656
B4E0P8;Q04323	44496.8	74466.1	55670.7
B4E0T7;Q96II8;Q96II8-2	Filtered	Filtered	Filtered
B4E0X8	200518	179760	246022
B4E0X9;P48553	Filtered	Filtered	Filtered
B4E0Y9;Q8NBY1;Q9P289	68031.9	56250.8	94503.1
B4E1D3;P02675	Filtered	Filtered	Filtered
B4E1G1;Q9BUN8;Q9BUN8-2	256625	163277	165243
B4E1J0;F5H2F6;F5H6Z1;Q96AQ6;Q96AQ6-2;Q96AQ6-3	Filtered	Filtered	Filtered
B4E1K0	103730	109963	112188
B4E1N7;P01106	30936.1	18461.8	21412.8
B4E1S6;P31431	Filtered	Filtered	Filtered
B4E1W4;E7EU88;Q9P2N6;Q9P2N6-2;Q9P2N6-3;Q9P2N6-4;Q9P2N6-5;Q9P2N6-6	Filtered	Filtered	Filtered
B4E241;P84103	618283	884198	893520
B4E2D5;E7ER46;F5GX46;Q8NEM7;Q8NEM7-2	23141.9	44950.5	33327.2
B4E2G8;F6XBD8;P35221;P35221-2	143325	140122	149120
B4E2J0;Q6P2Q0;Q9NP78;Q9NP78-2	Filtered	Filtered	Filtered
B4E2N0;Q8WZA0	Filtered	Filtered	Filtered
B4E2P0;G3V4A5;O75586	Filtered	Filtered	Filtered
B4E2P2;C9JA28;Q9UNL2	47638.7	51532.8	42515.3
B4E2S7;P13473-2	4235802	3.25642e+06	5268520
B4E2V5;P27105	173071	81059.9	188411
B4E2X3;Q8N6R0	Filtered	Filtered	Filtered
B4E3E5;Q92997	Filtered	Filtered	Filtered
B4E3J8;F5H277;H0YGN4;Q15208;Q9Y2H1	Filtered	Filtered	Filtered
B4E3T4;F5H357;Q93062;Q93062-2;Q93062-3;Q93062-4;Q93062-5	7146.36	5266.81	149486
B4E3W0;G5E9D4;Q96EB1;Q96EB1-2	Filtered	Filtered	Filtered
B5B2M6;E7EMS4;E7EP33;O95644;O95644-2;O95644-3;O95644-4;O95644-5;O95644-6;O95644-8	Filtered	68604.2	Filtered
B5MBW9;H0YBG0;Q8WYQ3	876165	388363	544214
B5MBX0;Q96FF9	37209.7	68910.8	59065.4
B5MBZ0;Q9HC35	28990	52936.7	51842.7
B5MBZ5;Q9HCN4;Q9HCN4-2;Q9HCN4-3	Filtered	21124.8	Filtered
B5MC00	Filtered	Filtered	Filtered
B5MC02;G5E9C6;Q8NFT2;Q8NFT2-2	Filtered	Filtered	Filtered
B5MC40;Q86YP4;Q86YP4-2	46324	58237	61382.4
B5MC53;B5MCF8;P39210	230723	244092	187861
B5MC72;Q96DZ1	26341.6	48677.1	52606.9
B5MCA1;Q96G28;Q96G28-2	Filtered	Filtered	Filtered
B5MCD7;O43759;O43759-2	Filtered	47527.8	52417.6
B5MCF9;O00541	33600.9	62310	71898.5
B5MCG1;P84101	4205.36	3357.76	4070.93
B5MCQ5;B7Z254;F8WA83;Q15084;Q15084-2	1.61022e+06	2.12799e+06	2.07564e+06
B5MCW3;H7C127;H7C128;H7C179;Q9H0E9;Q9H0E9-2;Q9H0E9-4	Filtered	Filtered	Filtered
B5MDE0;Q96AA3	6110.81	48392	66704.2
B5MDF5;P62826	1.59334e+06	2.07555e+06	1.99693e+06
B5MDL5;F6TXG5;P53778	Filtered	Filtered	Filtered
B5MDQ0;Q2NKX8	Filtered	Filtered	Filtered
B5MDU6;Q9H6V9;Q9H6V9-2	85578.6	47821.2	53967
B5ME50;E7EMY0;E7EP16;E7ERA9;Q71SY5;Q71SY5-2;Q71SY5-3;Q71SY5-4;Q71SY5-5	Filtered	31305.1	Filtered
B5ME91;Q53EL6	53881.3	88553.6	94726.6
B5ME97;E7EW69;E7EX04;Q9P0V9;Q9P0V9-2	50152.6	16633.4	33337.1
B5MEB7;Q8WXE1;Q8WXE1-2;Q8WXE1-3	Filtered	Filtered	31749.6
B5MEC7;Q9BZL4;Q9BZL4-2;Q9BZL4-3;Q9BZL4-4	Filtered	Filtered	2328.3
B5MEE5;C9JLZ9;C9JM97;C9K0L0;F8W9P9;Q8WXG6;Q8WXG6-2;Q8WXG6-3;Q8WXG6-4;Q8WXG6-5;Q8WXG6-6;Q8WXG6-7	Filtered	Filtered	Filtered
B5MEG5;E7EN22;E7EST9;E7ETS0;E9PEG8	66953.4	Filtered	6454.97
B6ZDS1;C9J4X5;Q9H160	Filtered	Filtered	Filtered
B7WNP8;Q7Z392;Q7Z392-3;Q7Z392-4	Filtered	Filtered	Filtered
B7WNT5;D4PHA3;E2GH20;E9PDK3;F8W742;F8W7T5;G8JLE2;H0YAR8;H0YBC8;H0YBP2;H0YEE5;P36402;P36402-10;P36402-11;P36402-12;P36402-13;P36402-14;P36402-15;P36402-16;P36402-2;P36402-3;P36402-4;P36402-5;P36402-6;P36402-7;P36402-8;P36402-9;Q5JRY3;Q5JRY4;Q5JRY5;Q9NQB0;Q9NQB0-10;Q9NQB0-2;Q9NQB0-3;Q9NQB0-4;Q9NQB0-5;Q9NQB0-6;Q9NQB0-7;Q9NQB0-8;Q9NQB0-9;Q9UJU2;Q9UJU2-3;Q9UJU2-5;Q9UJU2-6	Filtered	59657.2	53076.2
B7WP27;Q9HCG8	Filtered	30367.8	24950.8
B7WPG3;C9J9G0;Q5JB52;Q8WVV9;Q8WVV9-4	132244	174623	172194
B7Z1I8;O75461	Filtered	Filtered	Filtered
B7Z1J2;D6RAC5;D6RH18;E9PB74;E9PDA8;P81877;Q9BWW4;Q9BWW4-2;Q9BWW4-3	Filtered	48493	49827.9
B7Z1J9;Q8NB37	30514.3	Filtered	Filtered
B7Z1T1;H7BYE5;O00258;O00258-2	13640.3	17050.8	19521.7
B7Z1T6;E5RHV0;E5RHY8;E5RI52;Q6NTE8;Q6NTE8-2	Filtered	Filtered	Filtered
B7Z1Y4;B8ZZV9;B8ZZX2;Q9H8M1	63907.1	33378	27905.4
B7Z202;E9PEY4;F5GZG4;G5E9F6;O60941	Filtered	Filtered	Filtered
B7Z287;Q9NP50	Filtered	Filtered	Filtered
B7Z2A4;P18433;P18433-2;P18433-3;P18433-4	2745.83	3109.52	Filtered
B7Z2A7	265785	232888	307895
B7Z2D6;P35520;P35520-2	478480	224136	317910
B7Z2I1;C9J3K0;F5H6X3;Q96JH8;Q96JH8-1	Filtered	14381	11402.6
B7Z2L7;B7Z2U2;F5GXH5;F5H3S6;Q6ZVM7;Q6ZVM7-2;Q6ZVM7-3;Q6ZVM7-4	Filtered	Filtered	Filtered
B7Z2R4;E9PEH6;G5E9K6;O43556	Filtered	Filtered	Filtered
B7Z2S5;E7ESI6;Q16881;Q16881-3;Q16881-4	43315.1	161441	121442
B7Z2T7;O15075;O15075-2;Q5VZY9	Filtered	11759.7	Filtered
B7Z2Y2;B7Z7N2;F5H1E5;Q14746;Q14746-2	Filtered	Filtered	Filtered
B7Z2Y5;O75582	Filtered	166451	Filtered
B7Z355;C9IZI7;C9J7Z4;G5E9Q3;Q8NCE0;Q8NCE0-2;Q8NCE0-3	Filtered	Filtered	Filtered
B7Z367;D6RJ07;Q9UL40	Filtered	6552.52	27574
B7Z382;P49902	Filtered	Filtered	Filtered
B7Z3K8;Q9Y2Z9	787831	805681	621059
B7Z3N3;Q6P1A2	Filtered	Filtered	Filtered
B7Z3P9;B7Z4N7;F5H2Q9;F5H7Q0;G5E9G3;Q8IXQ5;Q8IXQ5-2	Filtered	Filtered	Filtered
B7Z468;B7Z574;E7ES10;E7ESM9;E7EVY3;E9PCH5;G5E946;G5E9D3;P20810;P20810-2;P20810-3;P20810-4;P20810-5;P20810-6;P20810-7	Filtered	18099.3	Filtered
B7Z473;F5GYS0;H0YGC8;Q8NCS7;Q8NCS7-2;Q8NCS7-3	Filtered	Filtered	Filtered
B7Z4B9;Q86SQ9;Q86SQ9-2;Q86SQ9-3	43724.9	20772.9	31382.4
B7Z4K6;O00115	773985	583374	1.01918e+06
B7Z4L1;B7Z4U3;C9JU30;E7EPD9;H7BXS2;Q9NRC1;Q9NRC1-4	Filtered	Filtered	Filtered
B7Z4M2;O75554	Filtered	Filtered	Filtered
B7Z4Q3	60692.7	103185	128092
B7Z4R5;E7EPF7;Q99571	Filtered	79686.6	83402.7
B7Z4S8;Q99538	398254	274273	545050
B7Z4U0;Q969M1	245000	319632	206483
B7Z4V2;P38646	96646520	44834676	71866488
B7Z4V9;Q9BT40;Q9BT40-2	10648.8	9824.91	7675.54
B7Z4X2;E7EQB2;E7ER44;P02788	134954	Filtered	78163
B7Z4Y6;P05186;P05186-2	Filtered	Filtered	Filtered
B7Z549;F5H7E1;P19827	2205.09	Filtered	Filtered
B7Z560;Q9NV88;Q9NV88-2	Filtered	Filtered	Filtered
B7Z5B0;E7EMV7;E7EPY1;E7ERB0;E7ET96;E7EW15;F5GYD7;F5H4X3;Q15025;Q15025-2;Q6N077	Filtered	Filtered	Filtered
B7Z5J4;Q9UI42;Q9UI42-2	10778.8	Filtered	Filtered
B7Z5N6;B7ZBU3;E7EQG4;E9PDG7;H0Y6Y1;Q5T1V6;Q5T1V6-2;Q5T1W1	Filtered	Filtered	43375.9
B7Z5R1;G3V2I6;G3V3X1;P31749	10952.6	15558.4	19143.7
B7Z5U5;Q9H4Z3	Filtered	Filtered	Filtered
B7Z5W1;Q9Y624	20479	15002.9	15747.8
B7Z5Z2;P62070	112727	83443.8	84353.8
B7Z660;C9JS40;Q5VZ89;Q5VZ89-2;Q5VZ89-3;Q5VZ89-5;Q5VZ89-6	Filtered	Filtered	Filtered
B7Z6B8;Q16698	1.74737e+06	1.43709e+06	1.38765e+06
B7Z6C0;H0YFA4;P52943	Filtered	Filtered	Filtered
B7Z6F5;C9JFB2;Q9Y548	Filtered	2883.44	Filtered
B7Z729;Q92484	126177	113103	168412
B7Z765;Q9UL01	Filtered	Filtered	Filtered
B7Z7D3;Q9BXW6	Filtered	Filtered	Filtered
B7Z7P8;P62495;Q96CG1	161856	188947	141125
B7Z7V7;F5GYW7;G5E9F1;Q96RG2;Q96RG2-2	Filtered	Filtered	Filtered
B7Z7X8;Q8NHH9	23248.1	30909.7	18006.3
B7Z800;P55263;P55263-2	39516.7	24337.1	41436.5
B7Z806;P13807;P13807-2	Filtered	20772.2	14470.3
B7Z817;Q15392	48742.2	32142.6	33542
B7Z831;D2DFB0;F5H4A4;Q9NZH0	Filtered	Filtered	Filtered
B7Z8C9;Q5TAQ9	Filtered	Filtered	Filtered
B7Z8G2;Q13451	Filtered	3819.48	5550.21
B7Z8R4;E9PCX3;Q15723;Q15723-1;Q15723-2;Q15723-3	48012.3	48176.3	63095.5
B7Z8T0;F5H203;Q00536	Filtered	Filtered	27123.7
B7Z8V9;B7Z929;Q9H336	Filtered	Filtered	Filtered
B7Z8Y7;O94762	Filtered	Filtered	Filtered
B7Z976;O60704	Filtered	Filtered	Filtered
B7Z984;F8VPI1;F8VPZ7;F8VQQ5;F8VQW0;F8VR05;F8VSI7;F8VVJ4;F8VX73;F8W086;F8W1G3;F8W201;P55061	Filtered	Filtered	Filtered
B7Z9G5;Q5VW32	18075.1	25417.9	24258
B7Z9I3;O75787	32828.1	67838.2	24927.3
B7Z9L2	163569	112199	Filtered
B7ZAA0;E7EQE2;E9PC65;E9PH88;P54277;P54277-3;Q3BDU3	Filtered	Filtered	Filtered
B7ZAS8;F5H2X7;H0Y5D5;Q5SYW2;Q9BTG3;Q9ULV3;Q9ULV3-2	2583.95	5806.49	10512.5
B7ZAX5;Q01415;Q01415-2	138583	176940	111851
B7ZB80;P21953	3.45066e+06	2.06098e+06	2.66755e+06
B7ZC38;Q9NR46	13039.8	11559.3	7825.81
B7ZKJ8;E9PGN5;F5H194;Q14624;Q14624-2	Filtered	Filtered	Filtered
B7ZKK9;Q16537	Filtered	Filtered	441614
B7ZKM0;Q15020	Filtered	63742.9	10807.7
B7ZKM8;O95487;O95487-2	129329	15484.8	126182
B7ZKN0;Q92859;Q92859-2;Q92859-3	Filtered	Filtered	4745.1
B7ZKQ9;Q8WTV0-2;Q8WTV0-4	112994	64838.2	103302
B7ZKS7;Q86UV5	Filtered	41212.5	36200.3
B7ZKT7;Q9BQS8	420094	145681	162638
B7ZKZ4;E7EWY8;P43694	15635.8	21486.9	21138.7
B7ZL00;D6REX3;H7C2W3;O94979;O94979-2;O94979-3;O94979-4;O94979-6;O94979-8	324045	253936	272999
B7ZL11;C9JY66;Q9BZ95;Q9BZ95-2;Q9BZ95-4	36460.2	55956.7	51134.9
B7ZL31;F8WBF5;P49759;P49759-3;Q9HAZ1	Filtered	Filtered	Filtered
B7ZL88;Q8N8Q8	167368	78005.7	72468.4
B7ZLE7;P53355;P53355-3	Filtered	Filtered	Filtered
B7ZLM8;H0YNM1;P30047	Filtered	Filtered	Filtered
B7ZLN5;Q17RB6;Q9ULD4	Filtered	Filtered	Filtered
B7ZLQ8;E5RJM0;Q17RY0;Q17RY0-2	Filtered	Filtered	Filtered
B7ZLX3;E7EUA5;F5GWS0;Q7Z460-2;Q7Z460-3	21950.8	41391.2	32813.7
B7ZLZ2;Q9BZQ6	Filtered	19840.1	10648.8
B7ZM82	32068.7	77753.1	70151.9
B7ZMG0;E9PGC5;F5GXI4;Q15262;Q15262-2;Q15262-3;Q5TG12	Filtered	13752	Filtered
B7ZMI4;E7EPZ1;F5H1U9;O75970;O75970-2;O75970-3	Filtered	Filtered	Filtered
B8QGS9;Q99959;Q99959-2	49298.5	48320.7	44795.5
B8ZZ87;H7C173;Q6NZ67	15614.4	55711.1	59479
B8ZZA1;B8ZZQ6;B8ZZW7;H7C2N1;P06454;P06454-2	14524.4	10084	19247.7
B8ZZC8;B8ZZE3;B8ZZY8;E7EMN2;F5GXZ1;F5H4E8;Q9NRN9	Filtered	Filtered	Filtered
B8ZZD4;E7ENV2;Q86VP1;Q86VP1-2	659228	461057	Filtered
B8ZZF6;C9J128;C9J173;C9J2Z6;E7ENF2;E7ET59;E7EUX4;P49441	Filtered	Filtered	Filtered
B8ZZJ1	17500.5	29702.6	28503.8
B8ZZJ9	18309.2	39579.8	22263.7
B8ZZN6;P63165	236741	493985	607861
B8ZZT7;Q9UK76;Q9UK76-2	61084.8	37894.3	64486.6
B8ZZV6;B8ZZY4;Q8WV83;Q8WV83-2	Filtered	Filtered	Filtered
B8ZZW9;Q8N3F0;Q8N3F0-2	Filtered	Filtered	Filtered
B9A018;Q53GS9	57597.7	135140	127497
B9A054;Q8TEB9;Q8TEB9-2	Filtered	50982.2	Filtered
B9EG97;E9PEP7;P08048;P08048-2;P08048-3;P17010;P17010-2	Filtered	Filtered	Filtered
B9EGA3;Q92925;Q92925-2;Q92925-3	91983.6	156415	136979
B9EGP5;F8VWA6;F8W1Z6;Q7Z3U7;Q7Z3U7-2;Q7Z3U7-3;Q7Z3U7-4	13161.1	Filtered	Filtered
B9EK38;E7EQJ8;Q6GYQ0;Q6GYQ0-2;Q6GYQ0-4;Q6GYQ0-5;Q6GYQ0-6	Filtered	Filtered	Filtered
B9ZVR8;C9JV64;Q70CQ2;Q70CQ2-2;Q70CQ2-3	739826	456979	417129
B9ZVV8;E7EN68;Q53H47	Filtered	Filtered	Filtered
C0H5Y7;Q16611	628406	543911	508108
C4AM86;Q92764	Filtered	Filtered	Filtered
C4AMA3;I3L2N9;O76011	Filtered	Filtered	Filtered
C4AMC7;Q6VEQ5	Filtered	Filtered	Filtered
C4P093;C4P0B0;E2QRA4;F5H1F1;Q5T409;Q9NRI5;Q9NRI5-2;Q9NRI5-3;Q9NRI5-4;Q9NRI5-5;Q9NRI5-6;Q9NRI5-7;Q9NRI5-8	Filtered	Filtered	Filtered
C6GKU9;Q96HR3	Filtered	Filtered	Filtered
C9EI59;Q9H7T9	Filtered	Filtered	Filtered
C9IY53;F8W8D3;Q14493	Filtered	Filtered	Filtered
C9IYG0;H7C1Z7;H7C270;Q9GZU7;Q9GZU7-2	Filtered	13871.4	16885.9
C9IYL4;P29083	Filtered	Filtered	Filtered
C9IYN9;E2QRN5;F8WEJ9;Q6GMV2	Filtered	Filtered	Filtered
C9IZI4;H7BXR8;H7C5Z9;Q14CB8;Q14CB8-2;Q14CB8-3;Q14CB8-5;Q14CB8-6;Q14CB8-7;Q8NA01	Filtered	16174.7	Filtered
C9IZU6;Q969T4;Q96LR5	Filtered	68679.8	84967.5
C9J016;Q9H977	Filtered	Filtered	Filtered
C9J066;Q8N4C6;Q8N4C6-10;Q8N4C6-2;Q8N4C6-4;Q8N4C6-7	215407	224677	360016
C9J0E4;P01040	20316.8	Filtered	30608.6
C9J0F0;E7ETP1;E9PFD3;F5GYL1;G5E965;G5E9V8;H0Y882;Q8NAN6;Q9H334;Q9H334-2;Q9H334-3;Q9H334-4	Filtered	Filtered	Filtered
C9J0I9;Q86WB0;Q86WB0-2	Filtered	Filtered	Filtered
C9J0J0;Q96EE4	Filtered	Filtered	Filtered
C9J0J7;G5E9Q6;P35080-2	100221	94961.6	136990
C9J0Q5;C9J239;C9J7T7;C9JE98;C9JFD3;C9JJF6;Q9Y618;Q9Y618-3;Q9Y618-4;Q9Y618-5	Filtered	Filtered	Filtered
C9J0W7;C9JNM5;F8W782;Q96A54	Filtered	Filtered	Filtered
C9J114;C9JV08;P17181;P17181-2;P17181-3	Filtered	Filtered	Filtered
C9J154;F2Z3A6;F8W8C2;Q9HBM0	Filtered	Filtered	Filtered
C9J164;C9K0J5;Q70E73;Q70E73-2;Q70E73-3;Q70E73-4;Q70E73-5;Q70E73-6;Q70E73-7;Q70E73-8;Q70E73-9	23288.3	8512.69	Filtered
C9J1C6;C9J391;F8WBU5;H7C426;Q9P0P0	Filtered	Filtered	Filtered
C9J2F8;Q5JS54	Filtered	Filtered	13572.2
C9J2G7;C9JCG1;C9JRS3;C9JTC5;E7EN86;E7ER34;E9PJF2;E9PLN4;E9PLS7;E9PMY8;E9PPB0;E9PS81;P52747;P52747-2	31711.8	8233.36	4190.44
C9J2K4;Q16864	128201	134135	143542
C9J2P0;C9J8K2;H7C061;P51965	Filtered	63222	Filtered
C9J2U4	3653974	3.30885e+06	2749620
C9J2Y9;P30876	36602.9	77452.8	68360.6
C9J384;E9PHS3;Q9BQ75	21546	81242.7	54921.1
C9J3D7;E7EQF2;Q9UKG9	201018	127165	188426
C9J3F9;C9JW41;Q9NQ55;Q9NQ55-2	28372.7	89540.1	65882.6
C9J3L7;C9J7N1;C9JYJ8;C9JZE3;E7EVL6;Q9BWE0	Filtered	7465.61	8400.2
C9J3Q3;C9J6N5;C9J6Y8;C9JP05;C9JQ40;C9JW51;C9JYP1;Q9H098;Q9H098-2	Filtered	Filtered	Filtered
C9J406	284060	201597	344829
C9J412;Q7Z736;Q7Z736-2;Q7Z736-3;Q7Z736-4	Filtered	Filtered	Filtered
C9J436;G3XAL7;Q96M27;Q96M27-2;Q96M27-3	2.89429e+06	Filtered	20463.7
C9J4G0;F8W038;Q8IXM2	83022.8	181923	191272
C9J4K5;C9JSP0;F8W8A5;F8WD19;H7C006;H7C1C1;H7C1M7;H7C304;Q9NYP3;Q9NYP3-2;Q9NYP3-3	Filtered	Filtered	Filtered
C9J4P6;E7EUS0;Q6E0U4;Q6E0U4-2;Q6E0U4-3;Q6E0U4-4;Q6E0U4-5;Q6E0U4-6;Q6E0U4-7	Filtered	Filtered	Filtered
C9J502;D0UFD1;D0UFD3;D3YTI0;P55327;P55327-2;P55327-3;P55327-4	Filtered	20782.8	22073.1
C9J5C7;C9JU06;C9JZ00;F8WC44;Q86W33;Q86W33-2;Q86W33-3	Filtered	Filtered	Filtered
C9J5J4;H0Y322;H7C4T7;Q5TKA1;Q5TKA1-2;Q5TKA1-3	Filtered	Filtered	93625.9
C9J5N1;Q9BTE6;Q9BTE6-2;Q9BTE6-3	Filtered	Filtered	149224
C9J5X1;P08069	43534.7	50864	50115.4
C9J6I6;C9JMV9;Q03154	Filtered	Filtered	Filtered
C9J6P4	113687	95787.9	81321.2
C9J6W2;Q96Q89;Q96Q89-2;Q96Q89-3	1.12833e+06	3890975	1.77955e+06
C9J712;P35080	68591.9	64392	99388.9
C9J7E5;Q9Y5L0;Q9Y5L0-1	Filtered	2059.29	1349.1
C9J7E8;Q9UL63;Q9UL63-2	Filtered	Filtered	Filtered
C9J7M1;O95749	Filtered	Filtered	Filtered
C9J8D0;C9JA69;F8W9C0;Q8WY36;Q8WY36-2	7453.37	17506.2	18851.8
C9J8E1;Q16644	Filtered	Filtered	Filtered
C9J8U1;F5H1H6;F8WAN1;H0Y3Q3;Q69YQ0	Filtered	Filtered	Filtered
C9J959	Filtered	17825.8	15350.9
C9J9I1;Q9C0D9	2937.62	25754.5	Filtered
C9J9K3;P08865	1.62005e+06	1.261e+06	1.61031e+06
C9J9V6;O75414	959643	780869	729553
C9JA05;D6RD17;D6RHJ6;P01591	Filtered	Filtered	Filtered
C9JA08;Q96D46	37566.3	18119.9	34028
C9JA65;O00458	Filtered	19629.7	12955.1
C9JA77;P13646-2	28741.4	79134.3	Filtered
C9JAB2;G5E9M3;Q16629;Q16629-2;Q16629-3	385931	384974	519089
C9JAK5	153426	84478.2	99740.6
C9JAL9;Q9BZE9;Q9BZE9-2;Q9BZE9-3;Q9BZE9-4	Filtered	Filtered	Filtered
C9JAX1;Q16595	244612	145417	270901
C9JB30;Q9UPY8;Q9UPY8-2	Filtered	Filtered	Filtered
C9JBG5;Q8NBJ9;Q8NBJ9-2	25590.7	22527.7	32036
C9JBL1;Q9Y6A9	90692.9	101203	97897.1
C9JBY7;F5H3P2;Q9Y291	3.39601e+06	2.2729e+06	2.48783e+06
C9JBZ4;Q9BT25;Q9BT25-2	Filtered	Filtered	Filtered
C9JC60;G5E977;Q6XQN6;Q6XQN6-2	Filtered	Filtered	24107.6
C9JC84;C9JEU5;P02679;P02679-2	Filtered	Filtered	Filtered
C9JCC6;E9PNC7;Q14919;Q14919-2	38636.3	74688.8	76621.6
C9JCW7;C9JE12;Q9BVT8	37850.2	58868.6	46357.5
C9JD84;E7EV71;Q14766;Q14766-2;Q14766-3;Q14766-4;Q14766-5	Filtered	Filtered	Filtered
C9JDG0;Q9NSV4	Filtered	23672.8	Filtered
C9JDM9;H0Y7R9;Q9NYQ6;Q9NYQ6-2	Filtered	Filtered	Filtered
C9JE15;H7C4I2;Q7Z695	91987.3	74316.9	Filtered
C9JEH3;C9JG97;Q13685	16895.9	23010.9	26319
C9JEJ2;P49585	11665	268347	259893
C9JF17;P05090	Filtered	Filtered	11660.1
C9JF58;H7C0S2;Q8WVF1;Q8WVF1-2;Q8WVF1-3	Filtered	Filtered	Filtered
C9JFM0;P23471;P23471-2	Filtered	Filtered	Filtered
C9JGP9;E7ESZ7;O95299	16262573	10481184	9822103
C9JHX9;Q2TB10	Filtered	23784.7	23290.1
C9JI34;C9JSK7;E5RHG5;E7EW39;Q7Z2H8	Filtered	Filtered	8826.23
C9JIE4;O15061;O15061-2;O15061-3	Filtered	Filtered	Filtered
C9JIF9;P13798	37180	50469	64222.3
C9JIQ2;Q6IQ49;Q6IQ49-2	152549	70213.6	83405.9
C9JIZ8;O15119;O15119-2;O15119-3	Filtered	Filtered	Filtered
C9JJ19;P82930	6838641	3.15456e+06	5.20137e+06
C9JJ91;Q5T2R2;Q5T2R2-3	256307	134847	135455
C9JJN9;Q8N3P4;Q8N3P4-2;Q8N3P4-3	Filtered	Filtered	Filtered
C9JJV1;Q9Y5U2;Q9Y5U2-2	Filtered	Filtered	Filtered
C9JJX6;E9PDC3;O00192;O00192-2	Filtered	Filtered	Filtered
C9JK10;G5E9H1;P23229;P23229-2;P23229-3;P23229-4;P23229-5;P23229-6;P23229-9	142457	535823	383272
C9JKA9;H7BYN9;Q9NS87;Q9NS87-2;Q9NS87-4	Filtered	Filtered	Filtered
C9JKC4;Q969T7	306590	Filtered	139039
C9JKL2;C9JPX5;O95772	30907.7	74845.6	88166.5
C9JKU3;Q9P1Q0;Q9P1Q0-2;Q9P1Q0-4	Filtered	172565	Filtered
C9JKX0;F8VVB8;I1E4Y4;Q9Y4F3;Q9Y4F3-3;Q9Y4F3-4;Q9Y4F3-5	Filtered	Filtered	Filtered
C9JL12	Filtered	Filtered	23875.6
C9JL36;Q8WUT9;Q8WUT9-2	287176	259503	284856
C9JL75;Q12767;Q12767-2	Filtered	Filtered	Filtered
C9JLE3;P51654	4692	3172.76	5155.37
C9JLU1;P52434	134920	154656	132152
C9JLW8;I3L2L5;I3L4Q0	Filtered	28383.9	48032.7
C9JLX3;E7EM89;O60266	Filtered	Filtered	Filtered
C9JLZ0;O95104;O95104-2	28809.6	45156.2	41683.7
C9JMG9;E9PG60;H7C107;Q5JU85;Q5JU85-2;Q5JU85-3;Q6DN90;Q6DN90-2	Filtered	Filtered	Filtered
C9JMP5;C9JT95;F8WAF5;H7C0W4;Q96AH0;Q96AH0-2;Q96AH0-3;Q9BQ15	Filtered	Filtered	Filtered
C9JMZ0;D6R942;D6R9J8;D6RAH2;D6RB91;D6RC63;D6RCM6;D6RG14;D6RG21;D6RJA7;D6RJG6;F8W7V7;F8W966;H0YM62;Q02078;Q02078-2;Q02078-3;Q02078-4;Q02078-5;Q02078-6;Q05BX2;Q06413;Q06413-2;Q06413-3;Q06413-4;Q14814;Q14814-2;Q14814-3;Q14814-4;Q14814-5;Q14814-6;Q5T9U4	Filtered	52465.3	58913.8
C9JN85;Q13309	Filtered	10950.5	Filtered
C9JNE2;Q9Y530	12565.7	14274	25172.2
C9JNE5;P58340;P58340-2;P58340-3;P58340-4;Q2TLE3	Filtered	2492.17	Filtered
C9JNZ0;C9JRY4;Q96IW7	Filtered	Filtered	Filtered
C9JP00;Q9NR56	Filtered	Filtered	31404.6
C9JP52;Q92609	Filtered	765.134	Filtered
C9JP84;E9PB45;F8VUW5;Q15038	Filtered	Filtered	Filtered
C9JP85;Q16656;Q16656-2;Q96AN2	Filtered	Filtered	Filtered
C9JPG0;Q12765	16770.9	29618.8	39098.1
C9JPL0;Q9UK58;Q9UK58-4	Filtered	Filtered	Filtered
C9JPP2;H7BXP1;Q9NYR9;Q9NYR9-2;Q9NYR9-3	Filtered	32842.3	32640.3
C9JQ25;Q0VFZ6	29284.7	Filtered	41851.5
C9JQ41;H7C525;Q4VC31	5.1185e+06	3.77825e+06	3.96512e+06
C9JQV6;E9PB63;E9PE62;E9PEE0;F5H096;F5H211;F5H4C0;F5H7N7;G3V3R7;G3V4U9;P54252;P54252-2	Filtered	790264	Filtered
C9JQW2;F8WE30;F8WF93;H7BZZ2;H7C0X4;Q92685	23337.1	30109.2	33099.3
C9JR56;Q3ZB87;Q9UPW6	Filtered	15586.2	Filtered
C9JR60;Q8IX18;Q8IX18-3	Filtered	13395	13196.6
C9JRD2;C9JXB9;P25686;P25686-2	Filtered	Filtered	Filtered
C9JRJ5;Q9UGP4	129597	Filtered	Filtered
C9JRS0;P42575;P42575-2	Filtered	Filtered	Filtered
C9JRZ6;Q9NX63	10935522	6.01557e+06	7132856
C9JS35;Q92890;Q92890-1	Filtered	Filtered	1491.74
C9JS86	8506762	7.71253e+06	7206685
C9JSC3;H7C2K2;Q9NZQ3;Q9NZQ3-2;Q9NZQ3-3;Q9NZQ3-4;Q9NZQ3-5	17722.2	64748.5	105864
C9JSZ2;Q96NT5;Q96NT5-2	13897.9	13003	17009.7
C9JTE9;G5E9L4;H7C5E2;Q9UHQ4	20391.5	11358.1	11174
C9JU26;F5H4H2;P56134;P56134-2	75909.5	84228	61943.1
C9JU51;Q93063;Q93063-2	Filtered	13606.4	13315.6
C9JUF4;O43768;O43768-3;O43768-5;O43768-7	114880	112700	183322
C9JUT4;Q93052	Filtered	Filtered	Filtered
C9JUU1;F5H6I7;Q6DD88	Filtered	Filtered	Filtered
C9JV30;E7EQS0;P20839;P20839-3	91874.8	88315.2	111314
C9JV86;F8VV56;F8VWK8;F8VZE2;F8W022;P08962;Q8N6Z9	50461.2	Filtered	53383.9
C9JVM4;E5RHU8;E5RIL0;E5RJS9;E9PHP8;H0YBC1;O95214	Filtered	Filtered	Filtered
C9JVN5;E9PD49;F8WAA2;Q9Y6N7;Q9Y6N7-2;Q9Y6N7-3;Q9Y6N7-4;Q9Y6N7-5	Filtered	13409.1	7781.98
C9JW63;Q9BSB7;Q9Y2D2;Q9Y2D2-2	Filtered	Filtered	10802.6
C9JWD3;Q9BQE9	Filtered	Filtered	Filtered
C9JWJ8;F8W8H9;Q14938;Q14938-2;Q14938-3;Q14938-5	Filtered	Filtered	Filtered
C9JWM7;P59998	248567	318974	213321
C9JWR9;E9PER6;O15530;O15530-3	Filtered	6598.48	Filtered
C9JWV4;H7C0G7;Q9H9Q4;Q9H9Q4-2	Filtered	Filtered	Filtered
C9JX01;Q9UM00;Q9UM00-2	272698	258512	248330
C9JX46;O95905	Filtered	Filtered	Filtered
C9JXA2;P29320	Filtered	Filtered	Filtered
C9JY04;Q9BU79	21151.6	18006.6	29943.7
C9JYJ4;Q8IUH4	Filtered	Filtered	Filtered
C9JYM0;O75817	Filtered	Filtered	Filtered
C9JYQ9;H0Y8C2;Q6P5R6	79004.7	Filtered	31506.3
C9JYS5;Q96ET8-3;Q9NYZ1	Filtered	Filtered	Filtered
C9JYY6;E9PDA4;F5GYD3;F8W774;F8W775;Q92823;Q92823-2;Q92823-3;Q92823-4;Q92823-5	Filtered	Filtered	Filtered
C9JZI4;Q9NP80	238486	185305	181797
C9JZR4;E9PB03;Q9NP61	Filtered	15370.7	Filtered
C9K005;Q9H330;Q9H330-2;Q9H330-4	23635.2	39223.3	40153.3
C9K0X5;H3BQR0;H3BRI5;H3BSK1;H3BTA6;O95149	Filtered	Filtered	Filtered
D3DNV8;Q8IVL5	Filtered	Filtered	Filtered
D3DU85;Q15599;Q15599-2	24054	8609.46	14052.5
D3YTA9;F6U1T9;P63098	Filtered	Filtered	Filtered
D3YTB5;P51617;P51617-2;P51617-3	Filtered	11919.9	12241.7
D6R933;D6R980;D6R9F6;D6RGD0;D6RIZ3	Filtered	Filtered	Filtered
D6R938;E9PBG7;E9PF82;Q13557;Q13557-10;Q13557-11;Q13557-6;Q13557-8	22802.4	53890.3	56349.8
D6R9E3;D6RCT6;D6RIA0;Q9BWT6	47967.1	34449.1	43840.6
D6R9L8;D6RD98;D6RDG6;Q6ZTZ1	Filtered	Filtered	Filtered
D6R9M8;D6RAE5;Q5Q9G5;Q5Q9G7;Q5Q9G8;Q9UBT6;Q9UBT6-2;Q9UBT6-4	Filtered	Filtered	Filtered
D6R9Q4;D6RAY6;Q96MT8;Q96MT8-2;Q96MT8-3;Q96MT8-4	Filtered	Filtered	Filtered
D6R9Q7;E7ESU6;Q8NBW4;Q8NBW4-2	105934	144044	192949
D6R9S7;D6RDB0;D6RDM3;D6RHE3;E7ENY4;E7ES98;Q96GZ6;Q96GZ6-2;Q96GZ6-5;Q96GZ6-6;Q96GZ6-7;Q96GZ6-8	3754.83	6350.08	4185.17
D6R9S8;D6RA76;D6RAZ7;D6RC11;D6RCE6;D6RCR8;D6RD48;D6RDI6;D6RDP6;D6RDY1;D6RFX6;D6RHI6;D6RHU6;D6RIU2;H0Y8T9;Q9NY35;Q9NY35-2	Filtered	Filtered	Filtered
D6R9W2;H9KV97;Q8NEC7	Filtered	Filtered	Filtered
D6RA47;D6RE79;D6RIZ4;Q14728	20516.8	27557.8	33979.7
D6RAD4;P50613	Filtered	Filtered	Filtered
D6RAK8;D6RBJ7;D6RF35;P02774;P02774-2	Filtered	Filtered	220693
D6RAU4;Q9H8E8	Filtered	Filtered	Filtered
D6RB01;Q9Y6X4	Filtered	Filtered	Filtered
D6RB59;Q6P2E8	139520	60345.8	76269.4
D6RB81;F8W9N1;Q9UHK6	75006.8	66018.8	78657.6
D6RBB0;O60683	243197	87506	273746
D6RBB5;Q99735	445059	565886	457057
D6RBI1;D6RFY6;D6RJ86;H0Y8S5;Q96H20;Q96H20-2	Filtered	Filtered	Filtered
D6RBN9;Q8IUW5	Filtered	Filtered	Filtered
D6RBR7;Q9Y3S2	Filtered	Filtered	Filtered
D6RBS5;Q8IZ81	238940	247044	157506
D6RBW1;P06730;P06730-2;P06730-3	132508	116547	108899
D6RC10	Filtered	Filtered	Filtered
D6RC82;D6RFZ2;Q0IIM8;Q0IIM8-2;Q0IIM8-3	Filtered	Filtered	Filtered
D6RCD0;Q8NBQ5	41659.8	43949.1	139122
D6RD20;D6RJC2;G3V1P6;P30307;P30307-2	Filtered	Filtered	Filtered
D6RD25;Q9Y255	71759	Filtered	Filtered
D6RDI3;H0Y8R4;H0Y919;Q9BVS4	Filtered	Filtered	Filtered
D6RDY7;Q9UJT9	Filtered	Filtered	Filtered
D6REA1;Q9H173	23423.4	Filtered	Filtered
D6REA6;F6TF62;F6VM53;H3BMF3;H3BNB2;H3BNT3;H3BQ55;H3BRT2;H3BS73;Q96S19;Q96S19-2;Q96S19-3	Filtered	Filtered	Filtered
D6REB5;P35475	9266.48	16395.8	22341.1
D6REN6;P12081	53633.8	84510.6	110246
D6REQ6	Filtered	38246.5	73017.8
D6RER5;D6RGI3;Q9NVA2;Q9NVA2-2	160892	111879	164687
D6REX7;D6RHD2;O43609	Filtered	Filtered	Filtered
D6RF48;Q9P2W9	27317.5	58128.3	28493.4
D6RFI3;D6RGI4;E7EQR8;Q9GZM5	Filtered	Filtered	Filtered
D6RFI4;Q99697;Q99697-2;Q99697-3	Filtered	115155	Filtered
D6RG18;D6RHI7;P51946	Filtered	Filtered	Filtered
D6RGG3;Q99715;Q99715-4	Filtered	Filtered	Filtered
D6RGK9;H0Y9C1;H0Y9Z5;Q96LI5;Q9ULM6	Filtered	Filtered	Filtered
D6RGV5;D6RIE3;P14406	42455624	27751156	24065696
D6RHE1	Filtered	Filtered	13714.6
D6RHG7;H7BXS5;Q86VE9;Q86VE9-2;Q86VE9-3;Q86VE9-4	Filtered	Filtered	Filtered
D6RHI9	1.21241e+06	1.25859e+06	1.87297e+06
D6RI04;Q53HV7	Filtered	Filtered	Filtered
D6RIA1;E9PH99;Q9Y4E5;Q9Y4E5-2	Filtered	Filtered	Filtered
D6RIW7	Filtered	Filtered	Filtered
D6RJ90;Q9Y6G5	Filtered	Filtered	Filtered
D6RJG9;Q9Y5W7;Q9Y5W7-2;Q9Y5W7-3;Q9Y5W7-4	Filtered	Filtered	Filtered
D7UEQ6;H7BXT2;Q9BSW2;Q9BSW2-2	Filtered	Filtered	Filtered
D7UEQ7;D9N155;F8W7N8;H0Y8B3;Q96HN2;Q96HN2-2;Q96HN2-3	262774	Filtered	Filtered
E0CX11	193978	193550	210901
E1B6X0;P43007	Filtered	Filtered	Filtered
E2QC23;O75600	345901	251257	267501
E2QRD4;Q6ZRQ5	Filtered	Filtered	Filtered
E2QRD5	Filtered	Filtered	Filtered
E2QRF9;O75496	Filtered	Filtered	Filtered
E2QRH7;F6SH78;Q5TGH5;Q9NYP7	159550	70323.8	61012.1
E3W978;F8WCW5;O75330;O75330-2;O75330-3;O75330-4	Filtered	Filtered	Filtered
E5KQS6;E9PK26;E9PMW6;Q9NRS6;Q9NRS6-2	Filtered	Filtered	Filtered
E5RFG5;E5RFT3;E5RGA0;E5RGW5;E5RIW0;E5RJH2;G3V105;O14920;O14920-3	Filtered	Filtered	Filtered
E5RFJ1;Q96MF7	68409.8	41635.4	109274
E5RFY4;E5RGP2;E5RIV2;G3V140;G5E992;Q5T6A0;Q8IYX8	Filtered	Filtered	Filtered
E5RG17;Q6P1N9	776672	1.81323e+06	987473
E5RGN3;E5RIM7;O00244	Filtered	34677.4	48041.6
E5RGS2;E5RJV5;Q9H6H4	35036.5	114133	95392.7
E5RGT2;Q96MH6;Q96MH6-2	Filtered	42406.2	Filtered
E5RGZ2;H0YC02;H0YKJ1;Q6NT76;Q6NT76-2;Q6NT76-3;Q6NT76-5	Filtered	Filtered	Filtered
E5RH35;E5RJA8;E5RJP8;E5RJZ7;Q9Y646	Filtered	Filtered	Filtered
E5RHG8;Q15369	136596	57642.2	89186
E5RI87;Q86XS8	Filtered	Filtered	Filtered
E5RIA9;E5RJK1;H0YAN3;Q9UJ68;Q9UJ68-2;Q9UJ68-3;Q9UJ68-4;Q9UJ68-5	162031	104305	105684
E5RIE8;O43513	Filtered	Filtered	Filtered
E5RIH5;E5RIZ0;Q6NXR4	Filtered	Filtered	Filtered
E5RIQ5;Q9BX73;Q9BX73-2	Filtered	Filtered	Filtered
E5RIW6;F5H8H8;Q5SVS4	197149	130540	110003
E5RJ26;P49810;P49810-3	29246.5	28927.3	36457.1
E5RJ52;P53677	Filtered	Filtered	39311.4
E5RJ68;O00203	47010.8	58292.1	71861.3
E5RJ99;Q8TCF1	Filtered	Filtered	Filtered
E5RJD8;O75347	250712	216618	334263
E5RJF8;E5RK82;O15182	Filtered	Filtered	Filtered
E5RJN7;E7EPX0;E7ER74;E7EVJ4;E9PEI3;E9PF26;E9PF50;E9PH62;F8VPI7;G5EA18;Q9NUL3;Q9NUL3-2;Q9NUL3-3;Q9NUL3-4	Filtered	Filtered	Filtered
E5RJR5;P63208	277046	267132	315821
E5RJS5;Q15390	333866	209513	218582
E7EM48;P33991	82058.7	95737.2	118262
E7EM60;P51398;P51398-2	4.36774e+06	2.86174e+06	2.92183e+06
E7EM64;Q7L5N1	9996.68	20453.6	32215
E7EM77;H0Y861;H0Y870;Q5SSC2;Q9H0R3	Filtered	Filtered	Filtered
E7EM99	Filtered	16401.3	11880.4
E7EMB1;Q9UH65	Filtered	Filtered	Filtered
E7EMB3;E7ETZ0;H0Y7A7;P62158	485654	810084	1.07908e+06
E7EMC3;E9PBC1;E9PBC2;F6PQP6;O95208;O95208-2	22136.9	7564.77	25596.7
E7EMF1;E7ESP4	18211.8	23363.6	19884.9
E7EMN6;P41236	15498.5	19266.1	27195.1
E7EMP9;H0Y2N2;Q9NRR4;Q9NRR4-2	Filtered	Filtered	46388.2
E7EMR3;E7EN28;E7ENK1;E7ES20;E7ESV6;E7ETE3;E7EUP0;E7EUW2;E7EVD6;E7EW95;E7EX52;E9PBG4;E9PCJ6;E9PE04;H0Y9K5;Q9HAR2;Q9HAR2-2	Filtered	Filtered	Filtered
E7EMS2;G3V3D1;G3V3E8;P61916	252298	219104	407037
E7EMT1;E9PE96;Q9Y6V0;Q9Y6V0-2;Q9Y6V0-5;Q9Y6V0-6	162459	136700	181742
E7EMX7;E9PED3;Q9P0K7;Q9P0K7-2;Q9P0K7-3	1226710	646984	758167
E7EN32;O00255;O00255-2	13253.5	26301.5	25979.6
E7EN46;Q8TB03;Q8TB03-3	Filtered	60208.6	Filtered
E7EN60;E7EPS3;Q9H2P9;Q9H2P9-2;Q9H2P9-3;Q9H2P9-4;Q9H2P9-5	16879.1	Filtered	Filtered
E7EN63;E9PBF2;Q9UBC3;Q9UBC3-2;Q9UBC3-3;Q9UBC3-6	72799.3	200867	145383
E7EN73;Q8IZA0;Q8IZA0-2	9714.1	21863.9	35223.8
E7EN96;E9PGW7;Q15528;Q15528-2;Q5T8T7;Q5T8T8	3180.69	7037.8	19368.9
E7END2;E9PHV5;P28290;P28290-2;P28290-3	Filtered	Filtered	Filtered
E7END7	101200	103763	86153.6
E7ENF1;F5H7W8;Q96C57	Filtered	Filtered	Filtered
E7ENH9;P53396	261482	183024	267078
E7ENI0;F5H7K2;Q8IWI9	5402.54	26177	30844.5
E7ENN3;E7EQI5;E9PEL9;Q8NF91;Q8NF91-2;Q8NF91-4;Q8NF91-8	12243640	5.76255e+06	10986656
E7ENR5;H0Y714;Q96G21	52053.9	42550.8	56406.8
E7ENU4;P55265;P55265-4	31052.9	76081.1	87189.7
E7EP00;P53992	15302.9	13397.2	16305.1
E7EP23;E9PCX0;Q6IA86;Q6IA86-3	Filtered	Filtered	Filtered
E7EP65;E7EW77;Q9NYB9;Q9NYB9-2;Q9NYB9-4	37736	71261.5	79372.1
E7EP74	174423	135901	42170.8
E7EP77;E7EQX0;E7ESC9;H0YAG1;Q8IZU2	87493	29672.3	54131.9
E7EP97;H3BR29;H3BSM7;Q96GQ5	Filtered	59383	Filtered
E7EPA5;P10643	246332	244207	270864
E7EPA7;P29401	423317	546295	522625
E7EPC6;P16070;P16070-10;P16070-11;P16070-12;P16070-13;P16070-14;P16070-16;P16070-17;P16070-18;P16070-3;P16070-4;P16070-5;P16070-6;P16070-7;P16070-8	171969	140375	162157
E7EPC9;E7EX17;P23588	55177.6	57362.6	49943.7
E7EPD1;P08572	155867	133115	113876
E7EPD8;G3V2F4;Q86TV8;Q9NUW8	Filtered	Filtered	Filtered
E7EPH0;F8W7B9;O60512	Filtered	Filtered	Filtered
E7EPI0;Q9P2D0	Filtered	Filtered	Filtered
E7EPK6;E7ETK0;P62847;P62847-2;P62847-3	405549	338334	320792
E7EPL3;Q7Z401	Filtered	Filtered	4171.33
E7EPL4;H3BNZ1;Q6P996	Filtered	Filtered	337634
E7EPN9;Q9Y520;Q9Y520-4;Q9Y520-5;Q9Y520-7	46618	47784.3	64755
E7EPP7;Q6ZWJ1	Filtered	Filtered	Filtered
E7EPT4;P19404	7816742	4302628	5687343
E7EPV7;P37840;P37840-2	Filtered	18425	Filtered
E7EPX7;E7EVP7;G5E9P1;Q14643;Q14643-2;Q14643-3;Q14643-4;Q14643-5;Q14643-6;Q14643-7;Q14643-8	59846.8	110573	1.20954e+06
E7EPZ3;O60784	Filtered	Filtered	Filtered
E7EPZ8;H3BNF5;H3BPV6;H3BSB6;H3BUA4;H3BUR2	Filtered	10583.5	Filtered
E7EQ34;O14653;O14653-2	Filtered	Filtered	1738.69
E7EQ45;Q9H0R1	Filtered	Filtered	Filtered
E7EQ64;P07477	41466.2	94711.8	120690
E7EQ67;F8W8D6;H7BY63;Q8NB25;Q8NB25-2;Q8NB25-3	Filtered	Filtered	Filtered
E7EQ69;Q9GZZ1	64780.1	82012.9	70701.6
E7EQ81;F6UBB5;Q7Z412	77698.4	61371.4	76456.2
E7EQC1;P22570	5030271	5.00488e+06	4.543e+06
E7EQD5;F5GXG3;Q15833;Q15833-2	Filtered	Filtered	Filtered
E7EQJ0	Filtered	Filtered	Filtered
E7EQN6;Q9GZR1;Q9GZR1-2	Filtered	Filtered	Filtered
E7EQT4	489916	84812.1	74384.1
E7EQU1;E7ES08;O15347	701289	2.1084e+06	1.6645e+06
E7EQW9;E9PCR8;Q96RT1;Q96RT1-2;Q96RT1-3;Q96RT1-4;Q96RT1-5;Q96RT1-6	47196.3	37782.2	57000.4
E7EQY4;E7EV10;F8W8M8;Q9BTC8;Q9BTC8-2	22726.2	29377.8	27661.9
E7EQZ4;Q16637;Q16637-3	Filtered	123602	36023
E7ER53;E7EVZ1;G3V138;Q86UP3;Q86UP3-2;Q86UP3-4	Filtered	Filtered	Filtered
E7ER66;O94986	Filtered	35038.9	Filtered
E7ER89;H0Y373;O95340;O95340-2	Filtered	16074	11462.1
E7ER97;F5GXH4;O95671;O95671-2	36023.8	42547.8	19622.8
E7ERH6;Q9UBN7	Filtered	Filtered	Filtered
E7ERJ4;E7EWI9;P51991-2	533626	631390	828069
E7ERK9;Q9UI10	34540.3	36799.9	38639.9
E7ERS3;Q86VM9	Filtered	Filtered	Filtered
E7ERU2;E9PEB9;F8W9J4;Q03001	19579.4	31326.6	22892.3
E7ERZ2;F8WDS5;F8WDV1;Q9Y535;Q9Y535-2	Filtered	Filtered	Filtered
E7ES19;P35443	Filtered	Filtered	Filtered
E7ES32	233703	80258.9	126815
E7ES43;O95757	18985.9	76667.7	73105.6
E7ES96;P49768;P49768-2	73146.6	43982.8	62410.7
E7ESA6;H0YBP1;Q05397;Q05397-5;Q8IYN9	Filtered	Filtered	Filtered
E7ESC0;H3BRP3;Q9UBI4;Q9UBI4-2	Filtered	Filtered	Filtered
E7ESC6;E9PEN8;Q9UIA9	27662.8	23836.3	12443.1
E7ESD5;E9PLN6;F2Z2Y1;O95677;O95677-2;O95677-4;O95677-5	Filtered	Filtered	Filtered
E7ESG3;Q96I15	Filtered	1.00822e+06	13379.2
E7ESG6;F5H0B5;Q92504	18236.6	42278.8	28945.4
E7ESJ0;Q92743	Filtered	Filtered	Filtered
E7ESJ3;Q9UPS8;Q9UPS8-3	Filtered	Filtered	23735.4
E7ESK6;E9PBI9;F5H0S6;P34741	25189	Filtered	22041.8
E7ESL0;Q9NWU5	3.69417e+06	2019265	1.95663e+06
E7ESM6;Q7KZF4	924152	769341	715186
E7ESS3;Q71RG4;Q71RG4-2;Q71RG4-3	Filtered	Filtered	Filtered
E7EST0;F6YA60;H0YFM4;Q969R8	Filtered	Filtered	Filtered
E7ESU5;P02768	759815	703806	920108
E7ESZ5;Q9BV35;Q9BV35-2;Q9BV35-3;Q9BV35-4	Filtered	185736	Filtered
E7ET15	Filtered	Filtered	Filtered
E7ET21;Q9NVC6	Filtered	29161.3	Filtered
E7ET38;F8VQP3;O95628-4;O95628-8	Filtered	Filtered	Filtered
E7ET49;Q8NCG7;Q8NCG7-2;Q8NCG7-4	Filtered	Filtered	25275.8
E7ET55;F5H748;P35670;P35670-2;P35670-4	Filtered	5246.28	Filtered
E7ETA6	115781	31091.4	11281.4
E7ETB3;Q9ULA0	87959	62546	58353.2
E7ETE0	314403	117738	207352
E7ETP2;Q96GG9	7619.62	Filtered	Filtered
E7ETP9;Q9UQV4	Filtered	Filtered	Filtered
E7ETR5;H3BSM0;Q53FZ2	41667.9	70031.3	27458.7
E7ETS7;Q12959;Q12959-3;Q12959-5;Q12959-6;Q12959-7	31272	26981.8	38188.8
E7ETU7;H0Y9G6;P09001	5453569	2.98854e+06	3.36937e+06
E7ETX0;Q8NHX9	9377.52	Filtered	Filtered
E7ETY2;Q13428-7	210912	386718	380754
E7ETY3;Q8IWA5;Q8IWA5-2;Q8IWA5-3	Filtered	Filtered	Filtered
E7ETY4;E9PC69;Q7KZI7;Q7KZI7-10;Q7KZI7-11;Q7KZI7-12;Q7KZI7-13;Q7KZI7-14;Q7KZI7-15;Q7KZI7-16;Q7KZI7-2;Q7KZI7-3;Q7KZI7-4;Q7KZI7-5;Q7KZI7-6;Q7KZI7-7;Q7KZI7-8;Q7KZI7-9	24934.2	37699.2	40661.2
E7ETY7;Q8TED1	31707.9	127698	61139.6
E7ETZ3;Q9BVC6	435762	1.13591e+06	504856
E7ETZ4;Q9Y6E2	36483	59354.6	72510.2
E7EU09;P11362;P11362-14;P11362-19;P11362-2;P11362-20;P11362-21;P11362-3;P11362-4;P11362-5;P11362-6;P11362-7	Filtered	Filtered	Filtered
E7EU13;Q96P48;Q96P48-1;Q96P48-2;Q96P48-3;Q96P48-4;Q96P48-5;Q96P48-7	Filtered	Filtered	Filtered
E7EU23;P50395	168841	192231	262986
E7EU28;Q86U06;Q86U06-2;Q86U06-3;Q86U06-4;Q86U06-5	Filtered	Filtered	Filtered
E7EU54	115278	126324	85574.4
E7EU78;Q9Y6K9;Q9Y6K9-2	Filtered	Filtered	Filtered
E7EU81	Filtered	Filtered	Filtered
E7EU96;P68400;Q5U5J2	110964	113532	118183
E7EUC3;O43657	22737.1	12802.4	41709.1
E7EUC7;Q16851;Q16851-2	Filtered	Filtered	155162
E7EUE1;P28288	6105586	2571578	4132784
E7EUG5;H7C5V1;Q9BTF0;Q9BTF0-2	Filtered	Filtered	Filtered
E7EUH9;H0Y6U5;Q86XI2;Q86XI2-2	Filtered	25967.2	21120
E7EUJ4;Q504U3	Filtered	Filtered	Filtered
E7EUL4;H7C3D5;Q8NC44	Filtered	Filtered	Filtered
E7EUN2;Q9UPQ3;Q9UPQ3-2	Filtered	22831.2	Filtered
E7EUN9;Q9NX74	290948	123549	144988
E7EUS2;Q8TBZ0;Q8TBZ0-2	32975	34375	30732.7
E7EUT4	7418521	5510861	10120588
E7EUU4	187597	226001	222891
E7EUY8;Q8TBZ3;Q8TBZ3-2	Filtered	Filtered	Filtered
E7EV41;F5GZV3;F5H5B3;F6VPY9;P32418;P32418-2;P32418-3;P32418-4	Filtered	Filtered	Filtered
E7EV80;E7EX01;Q14168;Q14168-2;Q14168-3	57667.1	44470.3	38732.8
E7EVA0	104889	166475	176259
E7EVC7;Q676U5;Q676U5-2;Q676U5-3	Filtered	Filtered	Filtered
E7EVF4;E7EVJ5;Q96F07-2	Filtered	16827.1	16995.8
E7EVF6;Q9Y4P8;Q9Y4P8-2;Q9Y4P8-3;Q9Y4P8-4;Q9Y4P8-5;Q9Y4P8-6	Filtered	Filtered	Filtered
E7EVG1;Q8TAD8	114590	Filtered	34599.7
E7EVH7	25796.6	31830.1	48976.9
E7EVH9;E9PAV8;F5H6B0;Q08623;Q08623-3	Filtered	Filtered	Filtered
E7EVR7;H7BXU9;P21802;P21802-10;P21802-11;P21802-12;P21802-13;P21802-15;P21802-16;P21802-17;P21802-18;P21802-2;P21802-20;P21802-21;P21802-22;P21802-23;P21802-3;P21802-4;P21802-5;P21802-6;P21802-7;P21802-8;P21802-9	Filtered	Filtered	Filtered
E7EW05;Q9NVU7	Filtered	9177.13	8125.99
E7EW18;P06746	Filtered	24335.1	23953
E7EW20;Q9UM54-6	Filtered	35624.6	29687.4
E7EW67;Q6PII3	Filtered	Filtered	Filtered
E7EW84;E9PHI3;F2Z2Q3;Q8TAG9	4166.99	Filtered	Filtered
E7EW90;Q70EL1;Q70EL1-10;Q70EL1-7;Q70EL1-8;Q70EL1-9	Filtered	Filtered	Filtered
E7EW96;O14656	52912.6	75945.2	40171.8
E7EWC2;Q13576	13287.7	Filtered	Filtered
E7EWE9;Q8NBT2	18471	17458.1	24883.3
E7EWM1;Q15596	Filtered	Filtered	Filtered
E7EWN2;H0Y5J3;O15550	Filtered	7613.85	9850.44
E7EWQ8;O75093;O75093-2;Q5T0V0;Q5T0V2;Q5T0V3;Q5T0V4	Filtered	Filtered	38454.9
E7EWR0;Q13616	99911.1	153841	275652
E7EWT3	Filtered	121837	109296
E7EWW0;F5H7K1;G5E9I3;Q7Z3J2	Filtered	27180.1	Filtered
E7EWX6;E7EXB6;Q8IXJ6;Q8IXJ6-2;Q8IXJ6-3;Q8IXJ6-4	Filtered	55991.6	Filtered
E7EWZ6;P06756;P06756-2	89053	43167.8	138643
E7EWZ9;P60983	45297	26641.1	57572.4
E7EX51;Q96ST2;Q96ST2-2;Q96ST2-3	11781.8	16022.2	17455.8
E7EX90;E9PFS5;E9PGE1	69703.6	7960.68	14841
E9PAL6;Q86XN8;Q86XN8-2	882824	756756	990346
E9PAL9	4100831	1.99482e+06	2.44196e+06
E9PAM1;F5H0M7;H0YGN7;Q2M296;Q2M296-2	Filtered	Filtered	Filtered
E9PAT7;Q15013	Filtered	Filtered	Filtered
E9PAU2	68029.1	71538.7	103642
E9PAV3;F8VU71;F8VZJ2;H0YHX9;Q13765	196880	98600.5	161091
E9PAX8;F8W0Q9;Q8NEY8-2;Q8NEY8-8	76534.8	93339.9	104816
E9PAZ2;Q96HR8	29129.5	29833.6	31358.4
E9PB02;P78346	Filtered	23513.6	31831.5
E9PB12;Q96RT8	Filtered	Filtered	Filtered
E9PB30;Q4KMQ2;Q4KMQ2-2	6834.46	27944.3	48277.3
E9PB61	795504	547620	797060
E9PBB0;Q6Y7W6	11010.9	7779.91	14319.8
E9PBB3;P40855;P40855-5;Q5QNY5	75260.8	19223.6	27145.5
E9PBD4;H0Y368;O60762;Q5QPK2	259574	309071	268822
E9PBJ6;Q12772	Filtered	Filtered	Filtered
E9PBL7;Q14393;Q14393-2;Q14393-3;Q14393-4	Filtered	166950	Filtered
E9PBL8;Q8WTW3	Filtered	Filtered	Filtered
E9PBP2;P09668	96075.6	62803.8	137408
E9PBQ3;Q8N511	61940.4	Filtered	Filtered
E9PBQ9	Filtered	Filtered	97079.5
E9PBR4;Q96NL0;Q96NL0-2;Q96NL0-3;Q96NL0-4	Filtered	Filtered	Filtered
E9PBR6;Q5SNT2;Q5SNT2-2	232725	Filtered	Filtered
E9PBR7;H2N333;H3BT57;P29590;P29590-10;P29590-11;P29590-12;P29590-13;P29590-14;P29590-2;P29590-3;P29590-4;P29590-5;P29590-8;P29590-9	Filtered	Filtered	Filtered
E9PBS3;H0Y442;Q6ZS17;Q6ZS17-2;Q6ZS17-3	Filtered	Filtered	Filtered
E9PBV3	4860.64	204007	6891.98
E9PBV5;Q96FV2	Filtered	Filtered	Filtered
E9PBY3	Filtered	Filtered	Filtered
E9PBZ4;Q6P4H8	94333.7	88578.7	68830.2
E9PC49;Q96EB6	Filtered	Filtered	Filtered
E9PC62;O95319;O95319-2;O95319-3;O95319-4;O95319-5;Q5VZZ6	Filtered	Filtered	Filtered
E9PC67	Filtered	Filtered	Filtered
E9PC74;Q13144	Filtered	13179.9	21206.8
E9PC87;O94876	Filtered	Filtered	Filtered
E9PC97;Q8IWS0	211089	400487	428991
E9PCA6;Q9P2E7	Filtered	Filtered	Filtered
E9PCH4	Filtered	Filtered	Filtered
E9PCI3;P08243	80766.4	101686	117691
E9PCI9;P14324	392249	284248	333044
E9PCK7;Q5JTH9;Q5JTH9-2	146084	117996	135658
E9PCL5;E9PCV2;F5GXA2;F5GXV6;F5H7Z0;F8WA69;P56945;P56945-2	Filtered	Filtered	Filtered
E9PCM7;F5H2R1;F5H4I8;F5H838;F5H8J0;G3V1R3;P37275;Q2KJ05;Q5VZ84	Filtered	Filtered	Filtered
E9PCR4;Q9UJX5	Filtered	Filtered	Filtered
E9PCW1;O95249	22035.3	21683.1	30119
E9PD27;Q8TCZ2;Q8TCZ2-2;Q8TCZ2-3;Q8TCZ2-5	16470.3	12521.2	17390.6
E9PD44;H0YH69;Q9HBU6	902591	1347738	1.79829e+06
E9PD50;E9PEH2;Q92540;Q92540-2;Q92540-4	Filtered	Filtered	Filtered
E9PD64	37060.1	32146.2	25127.7
E9PD83;F5GZ53;Q13009	Filtered	Filtered	Filtered
E9PDB5;Q8N2G8	53468	45954.2	72800.3
E9PDC5;F8W846;F8W9T5;G8JL96;Q13332;Q13332-2;Q13332-3;Q13332-4;Q13332-6	Filtered	Filtered	Filtered
E9PDF6;O43795;O43795-2	53443.4	61280.6	50154.8
E9PDH4;Q9Y2I7	Filtered	Filtered	Filtered
E9PDM9;F5H170;Q8WW22;Q8WW22-2	Filtered	Filtered	Filtered
E9PDN5;F5GZT3;F5H6K1;H0YFQ3;P11532;P11532-4	Filtered	Filtered	Filtered
E9PDP9;Q8WV44	Filtered	74425.1	Filtered
E9PDR0;P05166	1.12097e+06	838519	936885
E9PDV0;P32929	Filtered	Filtered	12934.3
E9PDW0;Q9ULJ7	Filtered	Filtered	Filtered
E9PDY5;Q96MM7;Q96MM7-2;Q96MM7-3	Filtered	Filtered	16980.7
E9PE68;Q9BZF1;Q9BZF1-2	98536.2	110014	97704.1
E9PE75;O43933;Q96S70	65804.9	27334.1	37063.8
E9PEC0;Q16186	39655.2	39263.8	71770.7
E9PEH8;F5H5C1;Q9Y4J8-2	Filtered	Filtered	22771.4
E9PEI0;Q69YH5	Filtered	26134.1	29909.6
E9PEJ6;P98196	53945.6	51963.9	72543.6
E9PEP6;O14786	27117.8	17547.8	14466.3
E9PER1;Q14689	Filtered	Filtered	Filtered
E9PES4;F5H1C2;Q9Y496	Filtered	Filtered	Filtered
E9PET8;O60282	342173	416123	395318
E9PEZ3;H9KV28;O60610	34692.9	32708	38271.5
E9PF17;P13611;P13611-2;P13611-3;P13611-4;P13611-5	Filtered	3058.73	Filtered
E9PF19;Q9Y4P3	194929	261631	201942
E9PF74;Q9HC21	1244862	1.19702e+06	740177
E9PFA8;H0Y5K5;H7BXI5;Q9Y282;Q9Y282-3	Filtered	45892.3	21984.1
E9PFA9;Q86Y07;Q86Y07-2;Q86Y07-3;Q86Y07-4;Q86Y07-5	Filtered	Filtered	Filtered
E9PFM7;Q8IXQ6;Q8IXQ6-2	Filtered	Filtered	Filtered
E9PFP2;O43719	Filtered	Filtered	Filtered
E9PFR0	36450.4	29852	Filtered
E9PFR3;Q14738;Q14738-2	44338.8	54198.6	38061.1
E9PFU1	140790	143472	167410
E9PFY5;F8W9I4	77460.2	67459.1	78994.9
E9PFZ1;Q5JPI3;Q5JPI3-2	Filtered	Filtered	Filtered
E9PFZ5;Q13308	102986	75368.6	110811
E9PFZ9;Q6SZW1;Q6SZW1-2	83541.5	81044.1	68568.7
E9PG19;O94868;O94868-2	Filtered	Filtered	Filtered
E9PG22;Q8IW35;Q8IW35-2	Filtered	Filtered	Filtered
E9PG71;P54764	Filtered	Filtered	Filtered
E9PG73;Q13427	68517.4	157815	148312
E9PG89;Q12873;Q12873-2	7311.85	17903.1	19342.8
E9PGD0;F5GXJ4;H0Y860;H7C5A5;Q9P246	Filtered	Filtered	Filtered
E9PGG4	Filtered	Filtered	Filtered
E9PGI2;H0YKJ9;O60637;O60637-2;O60637-3	1.21586e+06	1.49428e+06	1.95314e+06
E9PGL0;F5GXA0;F5GXF1;Q8NBK3;Q8NBK3-2;Q8NBK3-3	Filtered	Filtered	Filtered
E9PGM9;P78332	Filtered	181842	62191.4
E9PGP2;P03951;P03951-2	Filtered	Filtered	Filtered
E9PGQ0;Q96H78	93423.5	75413.5	72993
E9PGR1;Q9Y251	93707.5	79177.9	79713.1
E9PGT1;Q15631	36558	33019.2	33977.3
E9PGT3;E9PRI4;Q15418;Q15418-2	Filtered	54450.1	Filtered
E9PGT6;Q99627	Filtered	29045.2	34342.9
E9PGZ0;G5E9Q2;O75534;O75534-2	69566.4	18163.3	109852
E9PH08;H3BP77;O00142;O00142-2	122445	189900	142404
E9PH29;P30048	66020964	41178212	69860856
E9PH43;Q14376;Q5QPP4;Q5QPP9	Filtered	Filtered	Filtered
E9PHA2;Q15003	115506	86065.1	71024
E9PHH9;Q9BUI4	Filtered	Filtered	Filtered
E9PHI5;P51674	Filtered	Filtered	Filtered
E9PHK9;Q13428;Q13428-4	54955.3	131785	135703
E9PHQ3;F5GZL3;Q9HAU0;Q9HAU0-2;Q9HAU0-4;Q9HAU0-5	Filtered	43787.6	12172.5
E9PHR3;F5H1V8;G5E9I6;Q15555	71936.6	Filtered	18527.2
E9PHX2;H0YIY6	Filtered	10845.3	11554.7
E9PHX7;F5GYJ2;P52594;P52594-2;P52594-3	40163.8	21576	48377
E9PHY5	225029	149512	157077
E9PI08;E9PKA7;Q9Y256	Filtered	Filtered	Filtered
E9PI34;Q9UPV0;Q9UPV0-2	Filtered	Filtered	Filtered
E9PI87;Q9BUP3;Q9BUP3-3	157314	115284	124254
E9PI88;O60547	Filtered	Filtered	Filtered
E9PIC0;O14521	1.31705e+06	911032	733437
E9PIE4	1135410	754068	745518
E9PIK4;E9PIN5;E9PKN9;E9PKZ4;E9PMW4;E9PMY0;E9PN66;E9PNB3;E9PPM1;E9PQ46;E9PS55;O14683	Filtered	Filtered	Filtered
E9PIT3;P00734	22512.5	20896.1	33286.6
E9PJ24;F8WEF5;Q9P1Y6;Q9P1Y6-2;Q9P1Y6-3	Filtered	Filtered	Filtered
E9PJ42;E9PP29;Q5BJD5;Q5BJD5-2	81265	68146.9	71667
E9PJ64;F8WAP3;Q5VU43;Q5VU43-3;Q5VU43-4	48099.7	41304.4	40639.6
E9PJB8;E9PN30;Q6GYA4;Q9BQE4	Filtered	21999.1	16264.8
E9PJE5;E9PNH3;G3V151;Q17R31;Q17R31-2	Filtered	Filtered	49138.7
E9PK25;G3V1A4;P23528	1.68465e+06	1.23331e+06	1.76776e+06
E9PK59;E9PS17;Q96KG9;Q96KG9-2;Q96KG9-3;Q96KG9-4	Filtered	26925.5	18451.2
E9PK91;Q9NYF8-3	Filtered	Filtered	Filtered
E9PK95;F8VNP5;F8VZR5;P28702;Q5STQ1	Filtered	Filtered	Filtered
E9PKA8;E9PLE3;E9PQL5;E9PSC8;Q6ZUT1;Q6ZUT1-2;Q6ZUT1-3	Filtered	Filtered	Filtered
E9PKB9;Q92543	Filtered	Filtered	Filtered
E9PKD1	294410	465740	462380
E9PKE4;F5GXA8;Q9HAB3	Filtered	Filtered	430415
E9PKF6;G8JLI3;H7BXH2;Q5H9R7;Q5H9R7-2;Q5H9R7-4;Q5H9R7-5;Q5H9R7-6	31832.5	20985.5	29105.9
E9PKG1;G5E9B6;H7C2I1;Q99873;Q99873-2;Q99873-3	60917.6	83725.5	94199.8
E9PKP7;P17480-2	127630	188054	184738
E9PKS3;P17405	51492.7	68415.5	102592
E9PKT4;Q8N131;Q8N131-2	Filtered	73489.5	62571.9
E9PKU7	Filtered	Filtered	14371.9
E9PL01;Q15005	195424	270042	195760
E9PL17;Q92989	38934.8	52402.8	52236.6
E9PL22;F5H4Z5;Q9Y4L1	338882	490493	499436
E9PL47;F8W860;Q9UBF8;Q9UBF8-2;Q9UBF8-3	Filtered	Filtered	Filtered
E9PL71	19284.6	16325.3	18807.6
E9PL82;E9PMR4;P48509	102734	135894	178996
E9PLD3;E9PRG8	Filtered	39082.6	46623
E9PLE4;E9PS47;Q9BVG9	83864.9	97127.2	61062.5
E9PLI6;E9PQD0;E9PRR8;E9PS30;E9PS76;Q8N9N8	Filtered	Filtered	Filtered
E9PLJ2;Q5VUV5;Q9BZP6;Q9BZP6-2;Q9BZP6-3	Filtered	Filtered	Filtered
E9PLK3;P55786	587359	527961	465721
E9PLM6;E9PPJ5;P21741	24961.9	Filtered	23376.9
E9PLN8;F8W9H0;I3L3B4;Q9BQB6;Q9BQB6-2;Q9BQB6-3	188221	259413	197509
E9PLY5	Filtered	Filtered	Filtered
E9PM19;F5H7K8;P29597	Filtered	Filtered	Filtered
E9PM46;Q96K76	49087.9	19666.3	Filtered
E9PM92;O00193	Filtered	11441.8	12810
E9PM96;P18074;P18074-2	23296.9	8409.17	Filtered
E9PMA3;Q8IZM9;Q8IZM9-2	Filtered	Filtered	Filtered
E9PMI6;P54105	59854.3	20214.2	62839.4
E9PML2;Q96CM3	402401	211906	198148
E9PML7;E9PPM8;Q9Y315	Filtered	Filtered	Filtered
E9PMM3;Q9Y5Y5;Q9Y5Y5-2	286773	128517	158630
E9PMQ6;Q00613;Q00613-2	Filtered	Filtered	Filtered
E9PMR6;Q9NZN5;Q9NZN5-2	Filtered	2773.85	Filtered
E9PMU7	9351.88	20040.5	15713.2
E9PN10;E9PND3;O00559;Q5Y8C7	Filtered	Filtered	Filtered
E9PN11;P08134;Q5JR08	Filtered	73509.3	78676.9
E9PN47;G5EA34;Q8NDH3;Q8NDH3-2	Filtered	Filtered	Filtered
E9PN65;Q13444;Q13444-2;Q13444-3;Q13444-4;Q13444-5;Q13444-6;Q13444-7;Q13444-8	10597.2	5866.1	Filtered
E9PNK6	143730	149811	74030.8
E9PNP3;E9PR47;Q9H7C9	25240.3	11269.8	22598.8
E9PNW4;E9PR17;P13987	46879.1	63235.1	89268.1
E9PNW5	618353	618023	534215
E9PP15;Q14114;Q14114-2;Q14114-3;Q14114-4	Filtered	Filtered	Filtered
E9PP21;P21291	Filtered	Filtered	Filtered
E9PP28	Filtered	Filtered	Filtered
E9PPG8;Q53FT3	Filtered	Filtered	Filtered
E9PPN1;F2Z3M0;H0YCV5;Q8WW01;Q8WW01-2	Filtered	Filtered	Filtered
E9PPU0	Filtered	Filtered	Filtered
E9PPX7;F8W8H2;H0Y6L7;H3BQV1;Q0D2I5;Q0D2I5-4;Q0D2I5-5;Q0D2I5-7;Q5TF58	Filtered	Filtered	Filtered
E9PPZ9;O43292	105928	166254	100117
E9PQC4;Q9BZD4	12394	Filtered	14389.6
E9PQG7;Q03164;Q03164-2	59413.8	86761.7	87856.1
E9PQR4;P50607;P50607-2	Filtered	Filtered	Filtered
E9PQZ2;Q11206;Q11206-2;Q11206-3;Q11206-4;Q11206-5;Q8N6A6	Filtered	Filtered	Filtered
E9PR30;P62861	297066	260595	357211
E9PR71;Q9P2Y5	Filtered	Filtered	Filtered
E9PRT4;Q4G0F5	Filtered	2253.03	18656.2
E9PRV2;F5H202;P46937;P46937-2;P46937-3	Filtered	Filtered	Filtered
E9PRW7	18257.2	Filtered	Filtered
E9PRY8;P29692-2	610830	522298	706112
E9PSA5;Q96Q83	Filtered	Filtered	Filtered
E9PSI1	Filtered	Filtered	Filtered
F2Z2D5;Q8WVV4;Q8WVV4-1;Q8WVV4-3	Filtered	Filtered	Filtered
F2Z2E1;F5GY05;F5GZX9;Q96EK7;Q96EK7-2	Filtered	Filtered	Filtered
F2Z2E2;Q86VI3	25425.3	20469	18052.2
F2Z2T6;Q9HAH7;Q9HAH7-1	Filtered	Filtered	Filtered
F2Z2T8;F8VQY2;Q96RL1;Q96RL1-2;Q96RL1-3	Filtered	Filtered	Filtered
F2Z2U4;Q9Y4A5;Q9Y4A5-2	32471.5	75006	59857
F2Z2W7;Q8IZ69	Filtered	Filtered	21405
F2Z2X0;O00746;Q4TT34	699948	308772	475699
F2Z2X4;Q9C0E2	Filtered	Filtered	Filtered
F2Z317;Q9BYW2	Filtered	Filtered	Filtered
F2Z329;Q96Q45;Q96Q45-2;Q96Q45-3;Q96Q45-5	Filtered	Filtered	Filtered
F2Z384;Q96GJ1;Q96GJ1-2;Q96GJ1-3	249801	224877	185603
F5GWD1;Q9Y385	14039.8	14223.5	35897.1
F5GWD3;F5GWI8;F5GX35;F5GXG6;F5H4K7;F5H6X0;Q13889	Filtered	Filtered	Filtered
F5GWD7;Q8WVC0	Filtered	Filtered	Filtered
F5GWE0;Q15170;Q15170-2	Filtered	Filtered	Filtered
F5GWE5;Q00169	70519.7	85432.3	64259.4
F5GWF1;Q8TDJ6;Q8TDJ6-2	Filtered	39520.3	Filtered
F5GWG9	Filtered	Filtered	Filtered
F5GWH5;P61165	397099	435837	305135
F5GWI9;F5GXZ7;F5GZ97;Q9Y3C0	Filtered	Filtered	Filtered
F5GWJ1;O60245;O60245-2	Filtered	Filtered	Filtered
F5GWM1;Q14642;Q5T1B5	Filtered	Filtered	Filtered
F5GWM7	Filtered	Filtered	Filtered
F5GWP1;Q92575	306927	358796	332054
F5GWP3;H0YJ75;Q13362;Q13362-2;Q13362-3;Q13362-4	68316.1	80237.2	83371.3
F5GWR2	2.0115e+06	1.52562e+06	1.7963e+06
F5GWR5;Q13642-1;Q13642-4;Q13642-5	80866	72028.1	140743
F5GWS3;Q6P9B6	6057.83	17553.1	Filtered
F5GWT4;F5H2M7;Q9H4A3;Q9H4A3-2;Q9H4A3-5;Q9H4A3-6	6989.3	5110.98	14200.2
F5GWU3;Q86YB7;Q86YB7-2	Filtered	213662	Filtered
F5GWU7;Q99717	215913	92014.8	128412
F5GWW1;Q8N283	9784.75	21050.8	22948.3
F5GWX3;P25445;P25445-6	13360	13988.7	17921.3
F5GWX5;F5H2G1;Q14839;Q14839-2	365178	538574	384396
F5GWY5;F5H3W1;O00592;O00592-2	37732.3	35586.1	22705.8
F5GX09;Q5HYJ3	Filtered	Filtered	Filtered
F5GX28;O94953	Filtered	6563.94	9052.99
F5GX30;P78364	Filtered	Filtered	Filtered
F5GX42	46164.8	48843.3	52657.2
F5GX65;Q8N2F6-5	125829	128104	105463
F5GX74;G3V1U0;Q6VMQ6	Filtered	Filtered	Filtered
F5GX82;O94915	Filtered	Filtered	Filtered
F5GXC8;Q9P2R7;Q9P2R7-2	6.08107e+06	4417428	4.42605e+06
F5GXD5;G3V180;G3V1D3;Q9NY33	67816.7	84825.5	86203.7
F5GXE2;Q9NZ09;Q9NZ09-2	Filtered	Filtered	Filtered
F5GXE9;Q9Y3X0	Filtered	Filtered	Filtered
F5GXG0;Q96T88	219404	330055	294752
F5GXI9;F5GZ86;F5H5X3;H0YJH6;P42226;P42226-2	Filtered	Filtered	Filtered
F5GXJ0;F8W0W3;I3L0B9;Q5ST30	638130	589483	517627
F5GXK1;P20585	26146.6	55001.3	44628.3
F5GXK8;P0DJ07	114527	Filtered	Filtered
F5GXL7;I3L4X2;P33527;P33527-9	Filtered	26576.9	Filtered
F5GXL8;P09110	3328432	1.18664e+06	3.15677e+06
F5GXM6;Q5THR1;Q9H5Z1	71820.1	Filtered	Filtered
F5GXP4;F5GY14;H3BPJ2;Q15041	50249.1	71668.3	57380
F5GXU2;O60678	41581.4	33716.3	39124.4
F5GXW6;O95415	Filtered	Filtered	Filtered
F5GXX5;P61803	212756	191497	155553
F5GY30;P04156;P04156-2	Filtered	28716.2	21409.3
F5GY80;F5H7G1;P07358	Filtered	Filtered	Filtered
F5GYA4;O14519	32093.3	53398.3	64141.4
F5GYD8;P04062;P04062-2	680836	712114	1.02528e+06
F5GYE6;P04035	Filtered	Filtered	Filtered
F5GYH6;Q9Y217;Q9Y217-2	81917.4	Filtered	Filtered
F5GYJ5;Q9NX18	578811	216839	336647
F5GYN4;Q96FW1	76178.3	114472	108406
F5GYQ1;P61421	272371	216769	395220
F5GYQ4;P00367	27761794	18478354	19479212
F5GYQ5;Q5TBB1	20267.2	29914.7	29151.8
F5GYQ8	399388	165657	293409
F5GYX5;F5H445;O14513;O14513-2;O14513-3	69987.9	202999	163287
F5GYX8;F5H4W7;Q9NW81	444905	330644	317990
F5GZ02;Q96CP6;Q96CP6-2;Q96CP6-3	Filtered	67687.7	Filtered
F5GZ16;Q13200	74003.8	110893	114544
F5GZ28;P18858	Filtered	Filtered	30590
F5GZ51;Q8N5G0;Q8N5G0-2	929623	583792	701879
F5GZ78;F5H854;P49023;P49023-2;P49023-3;P49023-4	Filtered	Filtered	Filtered
F5GZ90;Q9NZJ0	Filtered	5622.09	5284.32
F5GZA2;F8WDA7;P39060;P39060-1;P39060-2	60798	39129	65533.2
F5GZB3;F8W891;H0YEW1;Q38SD2	1.94399e+06	1.54934e+06	1.1059e+06
F5GZK1;Q9UBQ6	235175	Filtered	Filtered
F5GZL5;Q5VT94;Q9H3K2	1.09671e+06	635417	653815
F5GZN0;Q7Z7A1;Q7Z7A1-2;Q7Z7A1-5	Filtered	Filtered	Filtered
F5GZS0;Q9H2U1;Q9H2U1-2	19893.1	23686.1	21691
F5GZS6;P08195;P08195-3;P08195-4	321048	307042	291657
F5GZX4;Q9H9Y6	39084.1	73090.2	65666.4
F5GZZ6;F5H5T2;F8VWA9;F8VXJ0;Q5BKT4;Q5I7T1	Filtered	Filtered	Filtered
F5H025;F5H1H0;G3XAF4;P32004;P32004-2	44473.4	36199.4	Filtered
F5H039;F8W7D6;Q9NQX3;Q9NQX3-2	22396.8	34126.8	37051.8
F5H055;Q5T0B9	Filtered	9989.78	Filtered
F5H066;F5H0S9;Q9UP95;Q9UP95-2	220805	241581	485836
F5H070;F5H4E6;Q9Y4C1	Filtered	Filtered	Filtered
F5H098;P40925	768787	503065	874694
F5H0C3;F5H219;F8W762;F8WCP6;Q7Z4S6;Q7Z4S6-2;Q7Z4S6-3;Q7Z4S6-4	10482.5	10750.5	10732.2
F5H0C4;Q9BRP4;Q9BRP4-2	20640.1	Filtered	25266.7
F5H0F5;Q8WU90	50244.3	67990.9	90009.9
F5H0F9;Q9UJX4	6147.17	20231.2	14766.2
F5H0G2;Q14849;Q14849-2	57151.9	82246	106896
F5H0H0	Filtered	Filtered	Filtered
F5H0H3;F5H1L1;Q15424	92759	126313	145694
F5H0J4;H0YGA7;H3BM05;Q9BY67	29959.7	37383.4	43542.7
F5H0J6	Filtered	Filtered	Filtered
F5H0K1;F8W9R9;O75448;O75448-2	4907.14	26255.6	11210.7
F5H0K8;F8WEA9	Filtered	Filtered	Filtered
F5H0L8;Q9Y6Y8	34990.1	29904.5	45144.6
F5H0N5;Q8ND04;Q8ND04-2	Filtered	Filtered	Filtered
F5H0Q5;P02765	33869.4	50056.9	65366.1
F5H0Q6;F8WAG9;Q8N2M8;Q8N2M8-3	Filtered	Filtered	Filtered
F5H0R0	Filtered	Filtered	Filtered
F5H0W0;H3BV55;O15305	Filtered	Filtered	Filtered
F5H0W2;Q8N428;Q8N428-2	Filtered	Filtered	Filtered
F5H0X5	54120.7	137111	146379
F5H0Z5;I3L172;Q9BUT9;Q9BUT9-2	Filtered	Filtered	Filtered
F5H1A8;F8WA45;P06396;P06396-2;P06396-3	18254.2	61367.7	54511.3
F5H1F7;P29375;P29375-2	Filtered	40370.3	Filtered
F5H1G4;F5H2X3;O60462;O60462-2;O60462-3;O60462-4;O60462-5	3982.85	Filtered	Filtered
F5H1L4;F5H2M2;F5H2V0	4.64287e+06	2.8309e+06	3.16742e+06
F5H1L8;H7C0T2;Q6GPH6;Q6GPH6-2	Filtered	Filtered	Filtered
F5H1N7;F5H2I6;Q6ZU35	Filtered	Filtered	7652.72
F5H1R5;P31323	Filtered	5710.21	66703.4
F5H1U5;P42357	Filtered	Filtered	Filtered
F5H1W0	30197.9	27968.7	38873.5
F5H1X8	8491.61	12580.8	Filtered
F5H1Y4;Q9HD26;Q9HD26-2	Filtered	19954.8	15029.2
F5H213;O00308	Filtered	Filtered	Filtered
F5H293;H7BXQ6;Q6UXD5-3	Filtered	Filtered	Filtered
F5H2A9;G3V1M7;P49748	2.86568e+06	1.5629e+06	1.69572e+06
F5H2J3;Q96GC9	46996.8	52449.8	44044
F5H2M5;Q13129	Filtered	13504.5	11432.1
F5H2Q4;P43378	Filtered	Filtered	Filtered
F5H2Q7;F5H2Y7;Q9C0E8;Q9C0E8-2	63061.5	121612	106538
F5H2S2;Q8TF71	Filtered	Filtered	Filtered
F5H2S7;Q13561;Q13561-2;Q13561-3	30200.2	22975.9	39094.2
F5H2T1;Q5VUJ6	38082.3	31263.2	35058.7
F5H2U2;Q13523	Filtered	36744.8	35440.5
F5H2Y9;F5H3R1;H0YMG7;O94788;O94788-2	911292	481947	651682
F5H315;Q9HCS7	293426	24713.1	65690.6
F5H364;F5H7Q6	Filtered	Filtered	Filtered
F5H365;Q15436	13876.9	34740.3	24947.8
F5H398;P78563;P78563-3	Filtered	Filtered	Filtered
F5H3A1;P05023	976377	811565	884082
F5H3E4;O95551;O95551-2;O95551-3	Filtered	Filtered	Filtered
F5H3H6;Q9BQ39	73181.2	89877.8	105414
F5H3J3;O43529	Filtered	Filtered	Filtered
F5H3N4;Q16850	144335	124559	114322
F5H3P9;Q969M3;Q969M3-3	26935.4	36181.5	29047.3
F5H3X5;Q99996;Q99996-2;Q99996-3;Q99996-5;Q99996-6	Filtered	216378	Filtered
F5H3Y1;H0Y7P1;Q93074;Q93074-2;Q93074-3	Filtered	17474.6	Filtered
F5H442;Q99816	34981.4	41619.9	56680.5
F5H476;Q5VTE6	6.64749e+06	5995110	8.05179e+06
F5H4C2;Q9H6Z4;Q9H6Z4-2;Q9H6Z4-3	24941.4	13812.6	24411.1
F5H4D0;Q2KHT3	Filtered	Filtered	Filtered
F5H4D7;G3V1L0;P78539;P78539-2;P78539-3	Filtered	Filtered	Filtered
F5H4E4;I3L2G3;Q9HA64	Filtered	Filtered	Filtered
F5H4F7;Q96JJ7	217023	235085	245124
F5H4G5;Q9UBV7	Filtered	Filtered	Filtered
F5H4I0;P09622	17735560	12122917	14863806
F5H4K0;Q5T9L3-2	80624.8	65428	56844.6
F5H4L0;Q9BSJ2	48113.5	78353.5	70256.5
F5H4M2;P54198	Filtered	16156.5	21023.3
F5H4P2;Q6GQQ9	Filtered	Filtered	Filtered
F5H4R0;Q59FE7	Filtered	Filtered	Filtered
F5H4U5;P04899-4	68229	69585.9	69275
F5H4U9;F8WA05;H0YKH1;H0YLF5;P40424;P40424-2	Filtered	49550.9	48197.1
F5H4V4;P46013	70766	121726	112416
F5H4W8;Q969U7	15532.1	15563.1	22298
F5H4Z4;H0Y6I6;Q96ME1;Q96ME1-2;Q96ME1-4	Filtered	Filtered	Filtered
F5H538;Q9Y6R4;Q9Y6R4-2	Filtered	Filtered	14676.1
F5H569;Q93050;Q93050-1	212755	181020	298122
F5H5D3	214131	279888	290355
F5H5E4;P54687;P54687-4	Filtered	26339.2	27372.8
F5H5H1;Q8NCL4	Filtered	Filtered	13902.7
F5H5I8;G3XAH6;P51003	Filtered	44073.2	11447.1
F5H5K9;Q8IY17;Q8IY17-2;Q8IY17-3	26204	23395	84394.4
F5H5M2;Q06828	Filtered	Filtered	Filtered
F5H5M6;Q14520	Filtered	Filtered	Filtered
F5H5M7;P15260	Filtered	Filtered	Filtered
F5H5M9;F5H865;Q9UKE5;Q9UKE5-2;Q9UKE5-3;Q9UKE5-4;Q9UKE5-5;Q9UKE5-6;Q9UKE5-7;Q9UKE5-8	344014	334702	262012
F5H5N0;Q5VT25;Q5VT25-2;Q5VT25-4;Q5VT25-5;Q5VT25-6	41568.6	Filtered	Filtered
F5H5N4;F8VVB6;F8W1A2;Q99435;Q99435-2;Q99435-3;Q99435-4	Filtered	Filtered	Filtered
F5H5P2;P12694	3.24447e+06	1.78155e+06	2.31527e+06
F5H5R8;P18440	Filtered	Filtered	Filtered
F5H5S2;F5H5X2;Q6NS38	Filtered	Filtered	Filtered
F5H5T5;Q7Z3V4;Q7Z3V4-2	Filtered	Filtered	Filtered
F5H5V5;Q01167;Q01167-2	Filtered	Filtered	Filtered
F5H604	65463.4	85921.6	83135.8
F5H620;Q96HP4	308019	220226	392113
F5H647;Q15572;Q15572-4;Q15572-5;Q15572-6	Filtered	Filtered	Filtered
F5H656;Q8WXF1	130351	120381	169747
F5H668	Filtered	Filtered	Filtered
F5H669;Q8N684;Q8N684-2;Q8N684-3	33746.9	45588.5	53519.6
F5H685;H7BYY3;Q5JWT2;Q9ULK4;Q9ULK4-2;Q9ULK4-3;Q9ULK4-4;Q9ULK4-5	Filtered	38710.7	Filtered
F5H6B8;Q12872	Filtered	Filtered	Filtered
F5H6D1;H0YH47;H7C0U7	1.1218e+06	Filtered	155529
F5H6K0;O43143	231058	450803	380657
F5H6L9;Q9NR20;Q9NR20-2	371453	260749	234871
F5H6R1;Q9Y388	Filtered	11756	Filtered
F5H6T3;O95873	Filtered	Filtered	Filtered
F5H6Z0;Q00537;Q00537-2	Filtered	Filtered	Filtered
F5H711;Q8N5M9	16769.5	32394.9	30787
F5H715;Q96BJ3	Filtered	Filtered	68463
F5H721;Q9Y2W2	22717.6	30049.4	26852.6
F5H7D3;O43567	57564.4	60254.4	63284
F5H7D6	Filtered	Filtered	Filtered
F5H7E9;O14802	143370	154351	118223
F5H7J9;O75581	31491.5	Filtered	Filtered
F5H7K4;Q6PIU2;Q6PIU2-2	Filtered	31696.1	Filtered
F5H7L1	Filtered	Filtered	Filtered
F5H7S4;O14757	64730	34808.5	11918.7
F5H7U7;O60507	Filtered	Filtered	Filtered
F5H816;P06737	216894	151150	138644
F5H843;O60669	6785.9	Filtered	8899.39
F5H872;Q13503	Filtered	Filtered	Filtered
F5H897;Q12931	36289680	23755670	26662296
F5H8F7;Q9UBL3;Q9UBL3-3	11156.6	66640.9	83643.7
F5H8I7;Q9Y5A9	56442.4	22666	39928.9
F5H8J3;O96005	51436	52741.9	62293.1
F5H8K4;O43242	16751	55288.6	55805.9
F5H8L2;Q6NTF9;Q9UDT1	Filtered	Filtered	Filtered
F5H8L9;Q5JRV4;Q92562	Filtered	Filtered	Filtered
F5HFY4;Q99733	90761.7	72209.2	125813
F5HGG6;P53634	856709	725363	1.21165e+06
F6Q3Q2;F6SR56;F6TEP1;F6UCG7;F6UHJ8;F6V754;F6X9C6;F6XM29;F6Y981;H0Y4N7;H0Y4Q1;H0Y4V1;H0Y504;H0Y5A5;H0Y640;H0Y652;H0Y6F8;P20036	Filtered	Filtered	Filtered
F6S0T5;O60341;O60341-2	35217.8	74064.7	65409.6
F6TQG2;P28370;P28370-2	5685.52	60366.9	36708
F6VZ39;Q9H0Z9	Filtered	Filtered	Filtered
F6XS94;F8W7C5;Q08E86;Q14667;Q14667-2	Filtered	7067.54	Filtered
F6XY72	Filtered	Filtered	Filtered
F8VNW9;F8VSK3;F8VWH6;H0YI03;P40425	Filtered	Filtered	Filtered
F8VPD4;P27708	139890	179190	225347
F8VPF7;F8WCH5;Q96D96;Q96D96-3	Filtered	Filtered	Filtered
F8VPG7;Q13492;Q13492-2	52884.1	41068.6	36265.8
F8VQ10;Q13838;Q13838-2	613864	1.11405e+06	1.02881e+06
F8VQD4;Q8TAD7	Filtered	Filtered	Filtered
F8VQD9;Q9BSB4	2205.34	3596.21	Filtered
F8VR31;P51530;P51530-2;P51530-3	Filtered	3983.6	3865.53
F8VRJ2	Filtered	Filtered	Filtered
F8VRQ1;F8VXY0;F8W6I7;P09651;P09651-2	1.38731e+06	1.50084e+06	2.61173e+06
F8VS64;P19013	Filtered	349370	Filtered
F8VS78;F8VWE0;Q12999	Filtered	Filtered	Filtered
F8VSL3;P25208	Filtered	Filtered	Filtered
F8VSZ4;Q9UIW2	Filtered	7617.97	85120.6
F8VU39;Q9UIF9;Q9UIF9-2;Q9UIF9-3	22478.2	28670.5	33076.6
F8VUJ3;Q8N4A0	115841	Filtered	Filtered
F8VUJ7	2.09136e+06	2.29029e+06	3161561
F8VV52;Q9NZN8	Filtered	Filtered	Filtered
F8VV69;F8W8P3;G3V1N7;Q6N075;Q6N075-2	Filtered	Filtered	Filtered
F8VVA7;P61923	46095.2	74560.2	77878.9
F8VVN7;F8VWX5;F8W098;F8W120;H0YIA4;Q9BVX2;Q9BVX2-2	Filtered	Filtered	Filtered
F8VW96;Q16527	42002.1	41179.3	32344
F8VW99;Q9H0K6	Filtered	Filtered	Filtered
F8VWT9	Filtered	Filtered	Filtered
F8VWZ8;Q52LW3	Filtered	Filtered	Filtered
F8VX04;Q9H2H9	Filtered	Filtered	Filtered
F8VXB4;P05787	175640	150270	234811
F8VXG7;Q99590;Q99590-2	Filtered	26210.7	25798
F8VXI9;Q14161;Q14161-3;Q14161-4	67723	5355.11	29295.8
F8VXZ4	148372	233863	151911
F8VY86;Q12888;Q12888-2	93210	24378.7	25255
F8VYA6;Q9NRL3	Filtered	3359.21	8359.26
F8VYE8;F8W0W8;P36873;P36873-2	183712	309377	227016
F8VZX2	865811	786131	1.13554e+06
F8W1H5;P51148	476054	226446	440786
F8W1S1;Q7RTS7	42643	Filtered	14157.5
F8W1T6;Q15434	Filtered	Filtered	Filtered
F8W682;P04920;P04920-2	30896.3	20983	Filtered
F8W6M3;Q9NYG2;Q9NYG2-2	Filtered	Filtered	Filtered
F8W6N3;Q92560	Filtered	Filtered	Filtered
F8W6N6;P10244	Filtered	Filtered	19776.6
F8W6V6;Q9H2D6;Q9H2D6-2;Q9H2D6-3;Q9H2D6-5	Filtered	64576.8	50298.1
F8W6X9;Q7Z5N4;Q7Z5N4-3	Filtered	Filtered	Filtered
F8W717;O00423;O00423-3	Filtered	Filtered	Filtered
F8W726	Filtered	Filtered	Filtered
F8W727;P62910	156596	126183	178694
F8W733;Q9NXR7;Q9NXR7-1;Q9NXR7-3;Q9NXR7-4	Filtered	7627.73	10703.7
F8W752;Q5R372;Q5R372-3;Q5R372-4	Filtered	Filtered	13710.9
F8W7K3	27294.4	Filtered	23994.5
F8W7M4;O14678	19284.8	14099.5	27627.9
F8W7P9;Q9H903;Q9H903-1	73422.4	65056.4	65206.8
F8W7Q4;Q96A26	7504360	3.5365e+06	4744204
F8W7S1;Q8NAN2	111643	55310.3	83453.6
F8W7U2;Q02487;Q02487-2	Filtered	Filtered	40442.5
F8W7X5;H7BYT3;O75928;O75928-2;O75928-3	23017.7	Filtered	33227.2
F8W839;O60333;O60333-2;O60333-3;O60333-4	13428.7	6153.86	8907.64
F8W840;Q9BYJ9	29722.2	42352.2	55585.4
F8W842;Q6UUV7;Q6UUV7-3	Filtered	Filtered	Filtered
F8W892;H0Y3N5;Q5HYY5;Q96T21;Q96T21-2	25780.2	29296.1	48276.5
F8W8I6;H0YGW6;P31483	41179.1	67253.4	108696
F8W8K3;Q8N108;Q8N108-12;Q8N108-13;Q8N108-14;Q8N108-15;Q8N108-16;Q8N108-17;Q8N108-18	Filtered	Filtered	Filtered
F8W8Q7;H0Y6I0;Q13439;Q13439-3;Q13439-4	Filtered	Filtered	Filtered
F8W8W7;O43493-6	Filtered	Filtered	Filtered
F8W8Y9;G3V588;G3V5A3;H0YJE5;Q13572;Q13572-2	Filtered	Filtered	Filtered
F8W911;P38571;P38571-2	305433	230896	338306
F8W913;H7BY83;Q5JSH3;Q5JSH3-2;Q5JSH3-3	Filtered	Filtered	Filtered
F8W914	Filtered	106432	Filtered
F8W930;Q9Y6M1;Q9Y6M1-1	234979	133124	163218
F8W955;Q5JVF3;Q5JVF3-2;Q5JVF3-3;Q5JVF3-4	21101.6	41438.7	35513
F8W973;Q5SRE5;Q5SRE5-2	29101.3	37383.9	21566.5
F8W9B5;H9KV59;O43663	95620.4	178760	130683
F8W9C2;Q05086;Q05086-2;Q05086-3	Filtered	Filtered	11279
F8W9C9;Q8WVQ1	Filtered	Filtered	Filtered
F8W9D9;P46734;P46734-2;P46734-3	10523.5	13474	10734.9
F8W9H9;P08651;P08651-5	Filtered	20169.3	18643.5
F8W9I1	91962.2	75230.3	93202.6
F8W9I9;Q13627;Q13627-2;Q13627-3;Q13627-4;Q13627-5	Filtered	13075.4	24169.9
F8W9L4;P22607-4	Filtered	Filtered	Filtered
F8W9R3;P51797;P51797-5	Filtered	Filtered	Filtered
F8W9X7;Q567U6	Filtered	Filtered	47461.4
F8W9Y2;Q96T76	Filtered	21711	21290.5
F8WA39;Q13613	422110	27885.8	26341.2
F8WA59;P52655;P52655-2	Filtered	Filtered	Filtered
F8WAB8	135603	202481	166010
F8WAC3;Q9NWZ5;Q9NWZ5-4	Filtered	Filtered	Filtered
F8WAD8;G5E951;Q9P0K1;Q9P0K1-2;Q9P0K1-3;Q9P0K1-4;Q9P0K1-5	Filtered	Filtered	Filtered
F8WAF2;Q9H9A5;Q9H9A5-2;Q9H9A5-3;Q9H9A5-4	Filtered	31360.3	49386.4
F8WAI1	61465.3	47632.4	58519.3
F8WAJ0;Q9H8H2	Filtered	Filtered	87785.2
F8WAK8;Q8N3U4;Q8N3U4-2	58046.8	169389	188764
F8WAN7;H7C4X9;Q9ULU4-12;Q9ULU4-13;Q9ULU4-14;Q9ULU4-9	45184.3	49693.4	79908.1
F8WB05	Filtered	Filtered	Filtered
F8WBK2;O43493;O43493-2;O43493-3;O43493-5	Filtered	2280.08	5279.54
F8WBK5;Q9NQ50	3.63278e+06	2.33608e+06	3.03528e+06
F8WBS1;Q9H832	Filtered	Filtered	6958.73
F8WBZ9;O75386	Filtered	Filtered	Filtered
F8WC15;P11166	46747.4	21536.3	19007.4
F8WC38;O75818;O75818-2	Filtered	Filtered	Filtered
F8WC68;O77932	Filtered	Filtered	Filtered
F8WCA0;P63027	146987	88150.4	114545
F8WCA3;Q8IX15	Filtered	Filtered	Filtered
F8WCD0;Q8NC42	Filtered	Filtered	Filtered
F8WCG1;O14657	481008	485185	576242
F8WCL7;Q9C086	Filtered	Filtered	Filtered
F8WCS9;Q70Z53;Q70Z53-2;Q70Z53-3;Q70Z53-4;Q70Z53-5	Filtered	Filtered	Filtered
F8WD04;G5E9T1;Q8WXF7	Filtered	Filtered	Filtered
F8WD63;Q70Z35;Q70Z35-2;Q70Z35-3	Filtered	Filtered	19593.5
F8WDL0	Filtered	Filtered	49913.5
F8WDM9;Q9NZM5	Filtered	10514.8	Filtered
F8WDY3;I3L0G8;P28715	Filtered	7229.15	3577.02
F8WE88;Q9Y4I1;Q9Y4I1-2	9191.3	16569.2	14257.6
F8WEC0;Q9H3L0	230836	70430.7	110101
F8WEC9;P02462;P02462-2	159113	38064.7	35672.4
F8WEQ4;P52735;P52735-2;P52735-3	Filtered	Filtered	Filtered
F8WF14;P06276	Filtered	Filtered	Filtered
F8WF48;Q99442	266745	282336	242125
F8WJN3;Q16630;Q16630-2;Q16630-3	56426.4	73953.2	82821.5
G3V0G5;Q8IV38	Filtered	Filtered	Filtered
G3V0I5;P49821;P49821-2	12366118	6.92521e+06	9506022
G3V0I6;Q01804;Q01804-3	33851.5	31926.3	30198.2
G3V117;Q9NPA8	106154	119183	118111
G3V130;Q96E29;Q96E29-2	627576	245108	332213
G3V167;Q9UGN5;Q9UGN5-2	46433	183314	125650
G3V1C4;P30260	20073.7	30092.1	38060.5
G3V1J3;O75027;O75027-2	687170	574199	548848
G3V1K2;Q9Y2B1	Filtered	Filtered	Filtered
G3V1K3	195693	230076	195442
G3V1N1;O15226	15121.9	39331.7	41145.8
G3V1N2	624456	614197	1.13608e+06
G3V1P3;Q969J3	47763.9	46113.3	67989.5
G3V1R9;G5E9U0;Q9NPH2;Q9NPH2-2	13201.9	21042	24482.2
G3V1S2;Q13617	27981.8	32664.9	43600.4
G3V1S4;G3V5S9;Q9Y324	31439.9	65260.5	51652.4
G3V1U1;Q8N118	13842.6	32553.9	Filtered
G3V1U8;P51948	Filtered	Filtered	Filtered
G3V1V0	705264	520363	742880
G3V1V1;Q8TBF4	Filtered	Filtered	Filtered
G3V1X9;P45973	256825	309683	300223
G3V2F7	284355	281551	707406
G3V2T7;H0YFJ8;Q8WXE9	225004	Filtered	Filtered
G3V2U7;P07311	Filtered	5586.87	13140.5
G3V2Y4	387656	220213	300461
G3V325	1.26556e+06	765806	858852
G3V3F1;Q8NHV4	80618.9	90271.2	103030
G3V436	1.00683e+06	767288	936813
G3V4K3;Q9H9C1	Filtered	Filtered	Filtered
G3V4L5;Q9BQT8	849527	865856	622853
G3V529;Q9GZR7	Filtered	16515.3	23286.5
G3V533;Q6ZMZ3;Q6ZMZ3-2	Filtered	20001.1	21798.7
G3V583;Q8N128;Q8N128-2	Filtered	Filtered	Filtered
G3V599;G3XAC5;O15320;O15320-3;O15320-4	30760.6	42564	31428.4
G3V5J8;Q9NUM3;Q9NUM3-2	Filtered	Filtered	Filtered
G3V5L1;P61244;P61244-2	9207	47612.3	27782.6
G3V5P4;Q9Y281	42536.5	37324.9	61820
G3V5Q5;Q9BU02	Filtered	Filtered	106882
G3V5T0	401231	296578	243824
G3V5T9;P24941	122737	156285	242194
G3XA81;Q9BTX1;Q9BTX1-2	83569.1	121692	106935
G3XA93	Filtered	Filtered	Filtered
G3XAA0;Q8NFD5;Q8NFD5-2;Q8NFD5-3	28250.3	43225	26662.2
G3XAB3;Q96AE7	Filtered	484052	679172
G3XAB8;Q9HCJ0;Q9HCJ0-2	Filtered	Filtered	Filtered
G3XAE6;Q8IWU5;Q8IWU5-2	Filtered	Filtered	Filtered
G3XAG2;H0YNH8;Q9BZF9	20920438	6266553	8350040
G3XAI2;P07942	38934.3	45548.9	31700.7
G3XAI9;Q5BKY9	Filtered	Filtered	Filtered
G3XAJ0;Q6JQN1	294740	316756	261746
G3XAN8;Q9Y5J9	7423752	5.4892e+06	5.94287e+06
G3XAP3;H7BY43;Q9NUT2;Q9NUT2-2	499513	531251	388337
G3XCN9;Q86TS9	2.46082e+06	1.51698e+06	1.78827e+06
G5E927	68817.7	195326	177411
G5E933;O95248;O95248-4	20799.5	27132.5	20329.9
G5E934	Filtered	Filtered	Filtered
G5E943;Q14542;Q14542-3	Filtered	Filtered	Filtered
G5E947	1.35185e+06	1.10443e+06	1.13241e+06
G5E948;O95819;O95819-3	55306.6	51836.5	59608
G5E949;P51649	3.51642e+06	3.3226e+06	3.01596e+06
G5E994	9515.98	12855.9	Filtered
G5E9A6;P51784	148979	Filtered	Filtered
G5E9B3;Q9BXB1	Filtered	Filtered	Filtered
G5E9D6;H0YJ86;Q9NS73;Q9NS73-2;Q9NS73-5	Filtered	Filtered	Filtered
G5E9E2;P29372;P29372-2;Q5J9I4	75826.5	86665.5	61718.5
G5E9E7;Q07157-2	276590	215724	269070
G5E9F3;Q9Y6J0	Filtered	Filtered	Filtered
G5E9F4;G5E9M7;G5E9M9;Q14135;Q14135-2;Q14135-4;Q14135-5;Q14135-6	Filtered	Filtered	Filtered
G5E9K7;O95251	44438	78739	64059.8
G5E9M5	125421	192594	249264
G5E9M6;Q9NX61	36256.2	36843.9	21237.8
G5E9M8;P08047	45494.2	52073	77578.7
G5E9N1;Q86VX9;Q86VX9-2;Q86VX9-3	Filtered	Filtered	Filtered
G5E9U1;Q15642;Q15642-2;Q15642-3;Q15642-4	Filtered	Filtered	Filtered
G5E9V1;Q92734	Filtered	42809.4	72646.5
G5E9V5;G5E9W7;P82650	5856611	3.55301e+06	4.79267e+06
G5E9W2;Q9P2E5	Filtered	22736.5	16348.1
G5E9Y2	91306.9	124513	139712
G5EA00;Q8WUR7	540830	244859	350296
G5EA09;O00560-2	490318	280979	404578
G5EA30;Q92879-4	107614	142192	215724
G5EA42;Q9NZR1	Filtered	Filtered	Filtered
G8JL95;Q9Y6X3;Q9Y6X3-2;Q9Y6X3-3	Filtered	Filtered	Filtered
G8JLB6;P31943	650275	772269	1.01317e+06
G8JLC9;Q63HQ2-2;Q63HQ2-4	Filtered	Filtered	Filtered
G8JLD3;G8JLM9;Q8IUD2;Q8IUD2-2;Q8IUD2-3	335161	12584	17266
G8JLD5;O00429-2;O00429-4	28668.1	40333.3	32015.9
G8JLE5;Q9BVW5	10595.9	18103.6	Filtered
G8JLG2;Q15517;Q2L6G8	Filtered	Filtered	Filtered
G8JLI1;Q4LE39;Q4LE39-2;Q4LE39-3	194949	141323	168539
G8JLI4;P02458;P02458-1	Filtered	Filtered	Filtered
G8JLI6;Q8IVL6	78140.8	88395.8	80172.9
G8JLJ6;H3BLT4;O15392;O15392-2;O15392-4;O15392-5	Filtered	10531.4	9692.28
G8JLK4;O75410;O75410-2	81110.6	25590.5	68071.4
G8JLL7;Q9H7P6	Filtered	Filtered	Filtered
H0Y2M7;H0Y599;Q8N1I0;Q8N1I0-3	Filtered	Filtered	Filtered
H0Y2P2;Q96IV0;Q96IV0-2;Q96IV0-3	Filtered	Filtered	Filtered
H0Y2P9;H7C0F2;Q8TBF5;Q8TBF5-2	Filtered	Filtered	Filtered
H0Y2T3;Q6IAN0	421334	359913	354936
H0Y2T7;Q9P2C4	Filtered	Filtered	15502.1
H0Y2Y8;Q15942	46380	35090.7	41973.2
H0Y2Z4	Filtered	19627.9	Filtered
H0Y327	613771	514311	628739
H0Y360;Q01433;Q01433-2	28866	24275.8	21547.9
H0Y3H2;Q99758	Filtered	50303.6	Filtered
H0Y3J5;Q9Y233;Q9Y233-2	47633.1	51503	33886.6
H0Y3R8	45831.8	Filtered	Filtered
H0Y3Y8;Q6NUK4	Filtered	Filtered	Filtered
H0Y449	16922.4	8377.17	9882.14
H0Y465;P21359;P21359-2	17419	13465.4	9903.38
H0Y477	21372.1	23752.1	28315.2
H0Y501;H7C1M5;Q9H147	Filtered	Filtered	Filtered
H0Y5H2;H7BY75;Q9BTV7	Filtered	Filtered	Filtered
H0Y5J5;Q7RTV5	Filtered	Filtered	Filtered
H0Y612;Q9UPN9;Q9UPN9-2	Filtered	Filtered	Filtered
H0Y645	Filtered	Filtered	Filtered
H0Y6C3;Q53H96	Filtered	Filtered	Filtered
H0Y6E6;Q92622;Q92622-3	Filtered	Filtered	Filtered
H0Y6K5;H0Y7L6;Q02447;Q02447-2;Q02447-3;Q02447-4;Q02447-5;Q02447-6	60191.7	61445.7	49948.3
H0Y7A5;Q9BX10;Q9BX10-2;Q9BX10-4	Filtered	23076.4	Filtered
H0Y886;O43674	3.8722e+06	3300804	2464072
H0Y8A7;Q9NV92	14433.6	13310.2	13443.3
H0Y9R1;Q8IYR6;Q8IYR6-2	Filtered	Filtered	Filtered
H0Y9X1;Q96EY4	60759.9	136341	101146
H0YA52;Q9H0N5	431375	283058	312891
H0YAR1;Q9Y4K0	Filtered	Filtered	Filtered
H0YAV1;Q7LG56	Filtered	Filtered	Filtered
H0YAZ3;O60504;O60504-2	Filtered	Filtered	Filtered
H0YB13;O76061	5219.96	5636.57	5580.58
H0YCK3;P55265-2	Filtered	Filtered	32997.3
H0YD93;Q8WXA3;Q8WXA3-2;Q8WXA3-3	Filtered	Filtered	Filtered
H0YDM2;I3L0I1;O94964;O94964-2	Filtered	Filtered	73903.8
H0YDQ8;Q53ET0;Q5T4K5	Filtered	Filtered	Filtered
H0YDU8;P53041	46972.8	49439.1	59681.2
H0YE28;Q8IZQ5	Filtered	Filtered	31004
H0YE66	Filtered	Filtered	Filtered
H0YE88;P28347	79331.1	182977	202978
H0YEB6;O60232	Filtered	Filtered	Filtered
H0YEF7	19288.2	31484.4	32599.8
H0YEL0;O14893;O14893-2;O14893-3	Filtered	Filtered	Filtered
H0YG33;P08107	2.59616e+06	2.45773e+06	3893179
H0YG49;Q01130	196712	197397	288467
H0YGC0;P52756	Filtered	120691	Filtered
H0YGH4;P01023	122555	96878.9	111672
H0YGP4;P31327	1.74834e+06	1.81222e+06	1.77267e+06
H0YGR4;Q9Y3B8	1.59378e+06	1.09531e+06	1331553
H0YH46;Q9NVR0	Filtered	Filtered	Filtered
H0YH67;Q8N8S7-2	116979	90388.2	150068
H0YH94;Q9NPR9	Filtered	Filtered	Filtered
H0YHD9	Filtered	386185	190510
H0YHF1;Q96MF6;Q96MF6-2	Filtered	26813.7	Filtered
H0YI09;Q9H8H3	180245	305585	227238
H0YI46;Q14D22;Q9BY43	Filtered	Filtered	Filtered
H0YIE9;O94952;O94952-1;Q4G104;Q8IUQ5	Filtered	Filtered	Filtered
H0YIV9	1961019	837783	1.18082e+06
H0YK61;H0YNK0;H0YNK8;Q5J8M3;Q5J8M3-2;Q5J8M3-3	114355	109712	85975.8
H0YK72;H0YK83;H0YNG3;P67812	73750	231316	308697
H0YKN5;Q9GZN2	Filtered	Filtered	Filtered
H0YLB5;P14859;P14859-2;P14859-3;P14859-4;P14859-5	65162.5	154735	158705
H0YLH3;Q92696	Filtered	Filtered	Filtered
H0YLN8;Q96QT4	Filtered	Filtered	Filtered
H0YLU8;H0YMD1;P01130;P01130-3;P01130-4	Filtered	Filtered	Filtered
H0YLV5;H0YMB3;H0YNJ6;Q6PKC0;Q86T14;Q9P2T1;Q9P2T1-2	Filtered	Filtered	Filtered
H0YLW2	425620	324454	475780
H0YLY9;Q14442	Filtered	Filtered	Filtered
H0YMV8;Q71UM5	213028	300243	344416
H0YN65;Q8NCH0	43512.7	277221	Filtered
H0YNH6;Q9Y3B6	Filtered	Filtered	Filtered
H0YNP1;O94923	Filtered	Filtered	Filtered
H3BLU6;Q63HN8;Q63HN8-4	Filtered	Filtered	Filtered
H3BLV9;Q96SB4;Q96SB4-3	10868.3	18720.3	58512
H3BLW6;Q5T3F8	Filtered	Filtered	Filtered
H3BLZ8;Q92841	947288	1.01288e+06	1.25429e+06
H3BM14;H3BM74;Q9Y5A7;Q9Y5A7-2	Filtered	Filtered	Filtered
H3BM82;Q6FIF0;Q6FIF0-2	Filtered	Filtered	Filtered
H3BMF4	263231	375553	481232
H3BMJ2;Q6ZRI6;Q6ZRI6-2	Filtered	Filtered	Filtered
H3BMM9;H3BTC0;H3BV80;Q15287	68460.8	365645	254765
H3BMQ0;P49815;P49815-2;P49815-3;P49815-4;P49815-5;P49815-6	Filtered	Filtered	Filtered
H3BMQ5	Filtered	Filtered	Filtered
H3BMU1;H3BUI0;P53990;P53990-2;P53990-3;P53990-4	33562.4	34341.6	37615.1
H3BMX2;H3BQY8;H3BUT6;Q9NTJ4	Filtered	Filtered	Filtered
H3BN51;H3BQA4;H3BR94;H3BS05;H3BUD2;Q9BTE1	14534	12495.4	31637.7
H3BN55;H3BS49;H3BU81;H3BUD9;H3BVH7;P51159;P51159-2	89511.1	110235	66085.2
H3BNP9;Q9Y6N5	117533	177560	109016
H3BNQ7;H3BRN4;P80404	43442.1	Filtered	16899.8
H3BNR7;H3BS25;Q9BY12	Filtered	Filtered	Filtered
H3BNT4;H3BSB3;Q99547	Filtered	79315.6	76466.7
H3BNU3	292101	281176	285947
H3BNY3	423801	Filtered	Filtered
H3BP13;H3BUK6;Q9UL33;Q9UL33-2	Filtered	Filtered	Filtered
H3BP28;Q99807	934635	970429	931889
H3BP91;P42126	7847157	6251682	6175710
H3BPE1;H3BQK9	52441.1	75218.3	72932.6
H3BPG9;Q58EX7;Q58EX7-2	Filtered	Filtered	Filtered
H3BPX2;Q5VST9;Q5VST9-2;Q5VST9-3;Q5VST9-5;Q5VST9-6	21009.6	28866.6	22299.9
H3BQB8;H3BUX2;O43169	392022	361613	299979
H3BQH3;Q8TBB5;Q8TBB5-2;Q8TBB5-3	Filtered	Filtered	Filtered
H3BR50;P27449	152051	155164	99624
H3BRB6;Q8ND25;Q8ND25-2	Filtered	Filtered	Filtered
H3BRL3;O14562	Filtered	48544.1	82390.8
H3BRQ0;Q96CD2;Q96CD2-2	Filtered	Filtered	Filtered
H3BRY3;P31146	Filtered	Filtered	Filtered
H3BS42;Q9H5H4	77634.1	197514	158209
H3BS47;H3BV03;Q68CZ1;Q68CZ1-2	Filtered	Filtered	Filtered
H3BSH7;Q969X6	17658.1	55454.3	94141.5
H3BSM5;P60520	85479.2	36291.2	41543.5
H3BST1;Q9UL45	Filtered	Filtered	Filtered
H3BT11;Q9NVU0;Q9NVU0-2;Q9NVU0-3	8463.96	11005.4	7611.15
H3BTN6;Q9H6L2;Q9H6L2-2;Q9H6L2-3	Filtered	Filtered	Filtered
H3BUA6;Q8N543	Filtered	Filtered	Filtered
H3BUV4;Q9NWW5	68922.5	117774	74261
H3BUV9;Q96S82	Filtered	Filtered	Filtered
H3BV00;Q6EEV4;Q6EEV4-2	Filtered	Filtered	Filtered
H6UMI1;O95166	Filtered	47766.3	63048.9
H7BXC6;Q96RQ1	68080.6	48094	Filtered
H7BXD5;H7C2Z6;P28676	11920.6	9582.95	10425.5
H7BXF4;Q9NXE4-2	47240.8	77003.9	65015.5
H7BXF5;Q9H0E3;Q9H0E3-3	Filtered	40560.9	22377.2
H7BXW3;Q9UNF1;Q9UNF1-2	27611	24334	200452
H7BXY8;O75882;O75882-2;O75882-3	13667.8	12179.6	11725.1
H7BXZ6;Q8IXI2-5	1757964	1.80333e+06	1.46564e+06
H7BY36	Filtered	Filtered	Filtered
H7BY58;P22061-2	4.19007e+06	3.08766e+06	3.40996e+06
H7BY99;Q8IZ21;Q8IZ21-2;Q8IZ21-3	38569.8	Filtered	Filtered
H7BYB2;Q5T8D3	1.24926e+06	881042	1.2032e+06
H7BYG3	2307367	10087953	8552570
H7BYJ1;Q969K3;Q969K3-2	Filtered	Filtered	Filtered
H7BYJ8;P48960;P48960-2;P48960-3	39677.3	22101.3	41238.9
H7BYM7;Q86XZ4	4172.13	3389.94	7186.8
H7BYP5;Q5VUB5	Filtered	Filtered	Filtered
H7BYW0	Filtered	6796.08	Filtered
H7BYY1	31208	14730.2	22833.8
H7BZ14;Q9H2H8	16103.2	16775.6	28401.1
H7BZ59;Q969E2;Q969E2-2	66347.7	87919.3	83677.3
H7BZJ3	2.54662e+06	3557556	3.33454e+06
H7BZK6;P62068;P62068-2;P62068-3;P62068-4	Filtered	Filtered	Filtered
H7BZR0;P18887	148371	240181	255649
H7BZT4;P61956;P61956-2	23412.6	31044.9	41167.5
H7BZY3;H7C4B9;Q9P1T7;Q9P1T7-1	Filtered	Filtered	Filtered
H7BZY9;Q8WTS1	Filtered	Filtered	Filtered
H7C0B3;H7C1G1;Q96K49;Q96K49-2	Filtered	Filtered	Filtered
H7C0S8;O75575	Filtered	Filtered	Filtered
H7C1J4;Q6BDS2	461646	794140	826723
H7C1N3;O15155	63316.8	45952.9	29356.6
H7C1U3;Q5T0F9-2	39946	Filtered	Filtered
H7C1U8;Q9BUR5	2.77244e+06	2.00453e+06	2219858
H7C285;O95858	Filtered	Filtered	Filtered
H7C2Q8;Q99848	44747.1	87081.6	110094
H7C2V5	54829.8	45795.1	43052.5
H7C3B3;H7C4C1;Q9NVV0	Filtered	Filtered	Filtered
H7C3D8;Q7Z7K0	1.46602e+06	1.04241e+06	1.25742e+06
H7C3K3;Q15057	Filtered	Filtered	Filtered
H7C3R6;Q8IWT0;Q8IWT0-2	Filtered	Filtered	Filtered
H7C4C9;Q3B820;Q3B820-2;Q3B820-3	Filtered	Filtered	Filtered
H7C4P8;Q6ZU65;Q6ZU65-2	Filtered	Filtered	Filtered
H7C4T5;Q9NR56-2;Q9NR56-3;Q9NR56-4;Q9NR56-5;Q9NR56-6	44387.4	42145.6	70720.4
H7C4Z8;Q6P1Q9;Q6P1Q9-2	10860.1	8060.71	14809.9
H7C561	Filtered	Filtered	Filtered
H7C5B8;O95178	1.69496e+06	1.3981e+06	1.37311e+06
H7C5E8;P02787	Filtered	Filtered	Filtered
H7C5I4	191914	133474	194603
H9KV30;Q8N9B5;Q8N9B5-2	Filtered	Filtered	Filtered
H9KV44;Q14156;Q14156-2	20231.6	21215.2	8613.08
H9KV46;Q86Y91;Q86Y91-2;Q86Y91-3;Q86Y91-4	Filtered	99127.6	80492.7
H9KV86;Q96JP5;Q96JP5-2	62802.7	116486	100361
H9KVA9;P46736;P46736-2;P46736-3	58072.6	11567.9	24876.7
I3L072;Q9BSJ5-2	470710	307225	314989
I3L085;Q8TCC3;Q8TCC3-2	745430	653448	841203
I3L097;Q6ZSR9	Filtered	Filtered	Filtered
I3L0A4;Q9NQA3	Filtered	Filtered	4886.86
I3L0C1;Q96Q15;Q96Q15-2;Q96Q15-3	98057.7	63498.9	56543.2
I3L0D3;P00738;Q0VAC5	Filtered	Filtered	Filtered
I3L0E3	6.85925e+06	4153531	4.20578e+06
I3L0K7	3186521	1.10472e+06	903728
I3L0L6;Q9H6Y7	95366.8	91320.7	80982.2
I3L0N3;P46459	69776.6	76921.2	144214
I3L0U5;Q6PK04	Filtered	43761.2	21770.3
I3L0X5;O75391	Filtered	Filtered	Filtered
I3L100;I3L2W2;Q96JN8;Q96JN8-2	Filtered	22342.2	Filtered
I3L112;P52429	Filtered	64844.7	Filtered
I3L124;I3L1H1;I3L266;I3L3K8;Q86WA9	9018.74	8233.52	Filtered
I3L1Q2;Q8WUZ0;Q8WUZ0-2	Filtered	74138.8	74268.6
I3L1Y9;Q96CP2	24631.2	22802.4	23448.5
I3L291;Q16625;Q16625-3;Q16625-4	40603.7	33217.2	Filtered
I3L2B0	Filtered	Filtered	Filtered
I3L2C7;P57678	Filtered	20025.1	21737.3
I3L2H2;Q15697;Q15697-2	Filtered	Filtered	Filtered
I3L2J8;Q9UPN4;Q9UPN4-2;Q9UPN4-3	Filtered	Filtered	Filtered
I3L2N2;O14641	384369	148520	34276.6
I3L2Q6;I3L3Q1;Q6ZSZ5;Q6ZSZ5-2;Q6ZSZ5-3	Filtered	Filtered	Filtered
I3L2R9;Q9NXR1;Q9NXR1-2	13809.3	12652.2	14495.8
I3L383;I3L3R1;P17481;P31273	Filtered	Filtered	Filtered
I3L397;I3L504;P63241;P63241-2	511556	479101	650303
I3L3A8;Q8IZL8	30372.6	37145.7	54366.5
I3L416	1.93893e+06	1629546	1.53774e+06
I3L448;Q5TC12	2.08835e+06	724141	1163673
I3L4C2;Q9UQB8;Q9UQB8-2;Q9UQB8-3;Q9UQB8-4;Q9UQB8-5;Q9UQB8-6	Filtered	Filtered	17078.2
I3L4I4;O75674;Q8N749	Filtered	Filtered	Filtered
I3NI00;P35613;P35613-2	1.25627e+06	1.01181e+06	1.23772e+06
O00116	7740755	3463120	5.9638e+06
O00124;O00124-3	Filtered	Filtered	Filtered
O00139-2	82847.1	137208	109399
O00148	157942	280156	277668
O00151	33369.9	22352.4	42864.2
O00154;O00154-4;O00154-6	64234.6	86968.6	88804.7
O00159-2	52557.6	44735.1	48674.7
O00161	116583	95990.7	135464
O00165	1.76188e+06	1.27185e+06	1.50875e+06
O00170	45304.1	30934.5	45003.9
O00178	34318.7	95965.5	92546.4
O00186	260071	433976	409969
O00217	14126346	8169617	10283814
O00231	44139.4	64887.5	47612.1
O00232	57897.7	88687.9	82478.5
O00233	36822.5	35957.3	40060
O00257	Filtered	37156	32663.2
O00264	1.07752e+06	1.2871e+06	1.39445e+06
O00267;O00267-2	16347	26657.9	26449.7
O00268;Q5TBP5	13762.3	29360.7	25752.3
O00273	17378.1	14761.4	19383.2
O00287	Filtered	Filtered	Filtered
O00291	15274.2	21046	19286.9
O00299	205220	187587	251146
O00311	Filtered	8339.19	6341
O00330	7167114	4529758	5295568
O00399	Filtered	Filtered	Filtered
O00400	Filtered	31473.8	39974.1
O00401	4176.09	20689.8	54631.5
O00410;O00410-3	1.13003e+06	1.73779e+06	1.17696e+06
O00411	1.63774e+06	1.09063e+06	853887
O00418	Filtered	Filtered	Filtered
O00422	39646.6	72790.2	75436.2
O00425	117844	142979	162853
O00442	34833.4	56741.7	55290.1
O00443	13395.8	40771.5	11694.4
O00461	11181	28852.3	20173.9
O00462	103906	73751.3	120657
O00468	54714	11880.7	25099.7
O00469-2	213843	256989	258740
O00471	Filtered	Filtered	4186.31
O00479	17097.7	45446.1	41921.5
O00483	24249042	14562194	15704359
O00487	53901.2	131284	261214
O00488	Filtered	Filtered	Filtered
O00505	Filtered	58588.3	66468.6
O00512	483267	307760	422205
O00548	Filtered	Filtered	Filtered
O00560	154560	106768	123123
O00566	26245.2	40809.6	76093.8
O00567	105980	249780	171835
O00571	185011	184667	223103
O00623	269644	185322	229310
O00625	Filtered	Filtered	Filtered
O00629	47041.8	41192.9	46178.3
O00743;O00743-2;O00743-3	20660.8	76731.1	43349.9
O00762	Filtered	Filtered	Filtered
O00764	53807.7	58808.5	73337
O00767	53556.2	61741.2	80537.9
O14494	Filtered	Filtered	Filtered
O14495	Filtered	Filtered	Filtered
[truncated: 4,968 more rows]

## Sheet: SPIONs
Abundances - SPIONs (Superparamagnetic iron oxide nanoparticles)
PG.ProteinAccessions	Replicate 1	Replicate 2	Replicate 3
A0AVT1	60045.9	21784.5	21411.4
A0FGR8-2;H7BXI1	811405	444638	847929
A0JLT2;A0JLT2-2	Filtered	Filtered	Filtered
A0JNW5	Filtered	Filtered	Filtered
A0MZ66;A0MZ66-2;A0MZ66-3;A0MZ66-4;A0MZ66-5;A0MZ66-6;B7Z7Z9	Filtered	Filtered	Filtered
A0PJW6	92849.6	77853.6	73009
A0PJZ3	Filtered	Filtered	Filtered
A0T4C8;E7ETB1;E9PCV4;Q9NRA0;Q9NRA0-2	73607.9	71387	74265.7
A1KXE4;A1KXE4-2;E7EVB9	Filtered	4354.13	5339.26
A1L020	Filtered	Filtered	Filtered
A1L0T0	360006	354912	356787
A1L170;A1L170-2;F8W6W0	51210.1	46894.5	46972.3
A1L188	26858	26329.8	26486.9
A1L443;D3YTH6;E2QRH1;F2Z373;Q5VZR2	Filtered	Filtered	Filtered
A1XBS5;A1XBS5-2;A1XBS5-3;A1XBS5-4;E5RGD0;F5H8I5;F8W7P5;G8JLC7;G8JLK8;H0YC32	84007.8	82798.1	79899.5
A2A2E9;Q86X10;Q86X10-3	19786.7	27381.7	22100.7
A2A2G4;Q9Y672	62388.2	52629.5	49365.8
A2A2L5;A8MSH5;Q9BY42	17288.9	18853.8	10958.7
A2A2Q9;Q9Y312	61871.5	64850.1	Filtered
A2A3N8;E7ENY0;E7EV99;P35611;P35611-2;P35611-3	138832	133884	142979
A2AAT3;B0S7V1;E9PD01;F6QTR8;F6REG0;F6RG32;F6SGB5;F6U8F7;F6UB75;F6UBK4;F6UKM5;F8VZ50;P28068	4480.02	4319.66	Filtered
A2AB90;A2ABB9;A8MUD0;D3YTI9;G5E9H8;O15533;O15533-2;O15533-3	64409.2	17345.3	16949.4
A2ABE9;A3KGM4;A3KGM5;A3KGM6;A3KGM7;B0UXD5;B0UXD6;B0UXD7;E7ENS8;H7C2J4;H7C5D6;O43196;O43196-2;O43196-3;O43196-4;Q5SSQ8;Q5SSR2	25100.3	Filtered	46387.3
A2ABF8;A2ABF9;B0UZY0;B0UZY1;B0UZY3;H0YHA9;H0YIM0;Q96KQ7;Q96KQ7-2	Filtered	9088.5	Filtered
A2AEA2;A2AEA4;F5GXA6;P10321	197427	200089	188542
A2BEU2;F5H135;P04440	98454.1	99194.8	85199.4
A2RRP1	330720	253383	257702
A2RTX5;A2RTX5-2	26846.9	32773	12714.2
A2RU67	82692.7	79352.3	69087.2
A2VCQ3;Q01973	106269	102958	109949
A3KFJ0;O14965	19112.5	19351.9	17698.9
A3KFL4	223137	249244	236442
A3KMH1;A3KMH1-3	42501.1	39543.2	46011.4
A3KMH1-2	Filtered	Filtered	Filtered
A3KN83;A3KN83-2;A3KN83-3	Filtered	Filtered	Filtered
A4D104	240933	238508	255094
A4D1D5;P21439;P21439-2	Filtered	Filtered	Filtered
A4D1E9	107616	99180.2	112369
A4D1P6	257907	249858	234993
A4D1S0;A4D1S0-2	7087.95	8372.09	10445.6
A4D1U4	156810	154619	169922
A4D1W8;Q9UM22	772716	809926	791502
A4D212;Q8N201	30481.2	22365.9	34108.8
A4D2Q0;E9PHI4	31704.2	31482.9	34423.4
A4D7V1;B8ZZU6;E9PBF9;E9PEK8;F5H629;G8JLM5;H7C2N6;P15336;Q8TAR1	Filtered	Filtered	Filtered
A4PB68;B0QZ55;H7BY62;Q3T8J9;Q3T8J9-2;Q3T8J9-3;Q9H869-2;Q9H869-3;Q9H869-5	Filtered	Filtered	Filtered
A5D8V6;F5H3K0;F5H4Q5	165220	174134	198432
A5PLL7;Q5TGE1;Q5TGE2	Filtered	Filtered	Filtered
A5PLN9;A5PLN9-2;A5PLN9-4;A5PLN9-5;A5PLN9-7;F5GXC3	Filtered	Filtered	Filtered
A5YKK6	91553.3	276990	90685.1
A6H8M8;B0UZ83;B0V2C8;F8VSI2;F8VW91;F8VZD8;P0C0L4;P0C0L5;Q5JNX2	91692.6	89819.9	91121.2
A6H8Z7;Q6UWP7	281008	296944	300920
A6NCB2;A6NMG4;Q9BX74	18790.5	14870.7	17350.3
A6NCD9;A6NKJ2;F8W8M4;F8WAB0;F8WAB1;H0Y3K7;O14639;O14639-2;O14639-3;O14639-4;O14639-5;Q5JVV3;Q5T6N2;Q5T6N4	21177	25108.8	40509.5
A6NCE7;H3BTL1;Q9GZQ8	280213	280020	288883
A6NCI0;Q9Y6G3	125205	93256.8	129213
A6NCN2	Filtered	Filtered	Filtered
A6NCZ0;C9JFX6;Q9BUJ0	14392.6	13846.1	13643.3
A6NCZ6;Q9BWM7	60720.5	55132	62859.2
A6NDG6	218366	Filtered	15585.1
A6NDJ8;Q86YS6	252037	174381	190789
A6NDN0;O43617	117641	123773	112421
A6NDS2;Q86WR7;Q86WR7-2	Filtered	Filtered	Filtered
A6NDU8	Filtered	102433	Filtered
A6NDW3;B4DKL4;E9PHD4;Q86X29	56423.1	54256.9	57147.4
A6NDW6;H0YDD3;H0YDQ1;Q9BVK2	148659	155843	225065
A6NDY9	164132	105961	115864
A6NE20;E7EQL6;F8WB49;O43272;O43272-1;O43272-2	Filtered	Filtered	Filtered
A6NED2;G3V2I3	Filtered	Filtered	Filtered
A6NEM2	59430.4	55121	59222.6
A6NEP9;H7BXY6;Q8NG11;Q8NG11-2;Q8NG11-3	36688.5	41521.2	30231
A6NES3;E9PL33;E9PM05;E9PS58;O14681	215474	216088	212096
A6NF48;Q9Y2X9	Filtered	12861.3	12173.2
A6NFN2;F5H1G9;F8WA55;F8WA56;Q8IZP0;Q8IZP0-10;Q8IZP0-2;Q8IZP0-3;Q8IZP0-4;Q8IZP0-5;Q8IZP0-6;Q8IZP0-7;Q8IZP0-8;Q8IZP0-9	198277	185770	200128
A6NFN6;Q9ULL5;Q9ULL5-2;Q9ULL5-3	Filtered	Filtered	Filtered
A6NFQ9;A6NMH6;F6W7K9;F8W8I8;Q92599;Q92599-2	101144	97202.5	100922
A6NFV8;Q96EV8	39994.6	40553.3	40005.5
A6NFX8;Q9UKK9	126919	128088	152540
A6NFY7	23130.8	27270	28285.1
A6NG10;B4DFG2;E7EX86;Q969T9	Filtered	Filtered	Filtered
A6NG79;Q92733	11702.1	29642.7	9408.02
A6NGJ4;Q7Z7H8	200214	199902	216362
A6NGW1;O95070	69863.5	61703.6	71282.7
A6NHB5;A6NHN7;Q14202;Q14202-2	20354.9	15962.5	18817
A6NHF2;B4DLJ9;F8W1Q3;P43251	7543.35	26280.8	32163.4
A6NHR9	31133.5	29713.3	27265.8
A6NHS7	165234	161944	158956
A6NI00;P63092;P63092-2;P63092-3	1117513	1.12043e+06	1.11327e+06
A6NI04;B4E3U2;E9PJM3;E9PL46;Q9UK99;Q9UK99-2;Q9UK99-3	Filtered	Filtered	Filtered
A6NI12;C9JDH3;H7BXQ4;H7BYF2;Q5JRG1;Q9BVL2;Q9BVL2-2	139714	140975	139731
A6NIG5;Q969Y2;Q969Y2-2;Q969Y2-3	138349	143019	144412
A6NIH7	55518.2	35776.9	51683.1
A6NIR2;Q9Y547	Filtered	46263	Filtered
A6NIW1;P14209	171104	153823	141297
A6NIW2;Q5JSL3	28253.9	39124.9	18841.2
A6NJ78	23162.7	24179.7	22901
A6NJD7;Q8IWP9	51422.3	34134.5	Filtered
A6NJF5;Q9UI36;Q9UI36-2	Filtered	Filtered	Filtered
A6NJK7;Q76FK4;Q76FK4-2;Q76FK4-3;Q76FK4-4	45971.6	10375.4	16055.9
A6NJM0;B1AKC9;P29323;P29323-2;P29323-3	75654	28198.3	50614.8
A6NJP5;P32189;P32189-1;P32189-2	123211	117711	120679
A6NJX0;A8K7N4;Q9H4F1	149749	264806	Filtered
A6NJZ6;O75054-2	123193	122233	122596
A6NJZ9;Q8WTT2	22454.6	21873	24125.9
A6NK58	40947.4	37151.3	24364.9
A6NKD9	25865.4	23382.6	26903
A6NKF1;F8WC89	101709	96559	Filtered
A6NKF9;B7ZAQ6;B7ZAQ6-2;B7ZAQ6-3;P0CG08	66061.9	65726.7	203766
A6NLH6;Q9P003	241401	225134	174273
A6NMI8;Q9BX70;Q9BX70-2;Q9H0C5	16046.7	20233.2	15855.2
A6NML8;C9J6U3;F5H7I1;O60879;O60879-2;O60879-3	3259.36	200534	2749.86
A6NMN0;P46020;P46020-2	Filtered	Filtered	16894.6
A6NMQ1;P09884	114640	150543	120284
A6NN50;O75147	143935	142727	141448
A6NNI4;B4DPP0;G8JLH6;P21926	120477	109962	103312
A6NNL5	47010.3	32326.8	30179
A6NNV6;O95229	60553.7	60465.1	65554.4
A6PVM9;F5GYC9;Q9BQI0;Q9BQI0-2;Q9BQI0-3	Filtered	Filtered	Filtered
A6PVN5;Q15257;Q15257-2;Q15257-3	Filtered	Filtered	10135.4
A6PVT6;A8MSQ5;F5GZV0;F5H083;F8WEA4;Q9NR82;Q9NR82-2;Q9NR82-3;Q9NR82-4	55793.5	50900.7	Filtered
A6PW55;Q15906	Filtered	51620.3	68414.8
A6PW57;Q99755-2;Q99755-3	78344.3	76446	77634.4
A6PWM2;Q6UXH1;Q6UXH1-2;Q6UXH1-3;Q6UXH1-4;Q6UXH1-5;Q6UXH1-6	87175.3	79466.2	86086.6
A6QRH6;P98173;Q5HY75	43867.2	37926.7	47377.9
A7E2V4;A7E2V4-3;A7E2V4-4;A7E2V4-5	55138.8	53679	53622.2
A7MAP0;Q9ULV4	588150	598061	566470
A8CG34	65100.4	66497.2	66190.9
A8CTX8;A8CTY3;B4DTM2;E7ERJ0	81701.4	75891.7	91106.6
A8K040	76869.5	74093.6	79504.8
A8K092	9431066	9484185	9698587
A8K1B6	1.70612e+06	1.70336e+06	1784494
A8K1C9;Q96LT9	Filtered	Filtered	Filtered
A8K2U0;F5H2W3	Filtered	Filtered	Filtered
A8K2U1;F5H225;Q5NDL2;Q5NDL2-2;Q5NDL2-3	22226.4	21894.2	24657.5
A8K327;B4E0V4;Q9UQ49	26647.2	27101.9	31490.5
A8K3Z3;P62195	103066	97377.3	102645
A8K7Q2	91547.2	96173.2	106115
A8MPX7;F5GWL7;Q9H5V9	48905.8	69339.4	36165.6
A8MPX9;O75140;O75140-3;O75140-4;O75140-8	86290.5	87087	84903.4
A8MQB8;G3V0J0;Q06787-2	96488.7	57919.3	44767.4
A8MST6;E7ERV6;E9PHX5;Q5JTW2;Q5JTW2-2;Q5JTW2-3	16474.4	30809.5	27235.6
A8MT24;E5RGQ3;Q9H446	27199	Filtered	Filtered
A8MT69;A8MT69-2;A8MT69-3	Filtered	Filtered	Filtered
A8MT70;A8MT70-2;F2Z370	Filtered	Filtered	Filtered
A8MTC3;C9JWB0;Q7Z5J4;Q7Z5J4-2	Filtered	Filtered	Filtered
A8MTG3;E1P660;H0Y3M2;O43670;O43670-2	45672.2	82727.3	44538
A8MTG8;B7Z441;C9JAA7;C9JBY2;F5GWK4;G5E9V6;Q8IUR7;Q8IUR7-2;Q8IUR7-6	522661	523640	518327
A8MTH6;C9J0K6;P30626	1.64597e+06	1.61648e+06	1.65447e+06
A8MTN3;F5H1T9;F5H6S0;P0C7H8;Q9BYR9;Q9BYU5	Filtered	Filtered	Filtered
A8MTT3	63467.1	61348.2	60256.7
A8MTY9;O14972	197238	206151	224318
A8MU17;F5H2B2;F5H6B6;F5H8A0;Q86TN4;Q86TN4-2	32685.7	17101.4	19953.6
A8MU27;A8MUA9;B4DUW4;P55854	594475	494634	618806
A8MU44;Q9UJC3	1611.26	Filtered	1408.23
A8MU99;Q9NRP7;Q9NRP7-2	37986.6	32321	31489
A8MUB1;P68366	152230	159608	161417
A8MUM1;Q53HC9	72274.8	53136	46359
A8MUS2	52410.3	410017	57112.1
A8MUW5	215983	208672	220891
A8MV58;Q16643;Q16643-2	167646	163578	166520
A8MV89;Q5M775;Q5M775-2;Q5M775-3;Q5M775-4;Q5M775-5	108989	73470.2	85761
A8MVZ6;F8W113;Q96G01;Q96G01-3	34779.2	40660.7	49443.2
A8MWB4;B7Z1T4;O43739;O43739-2;Q15438;Q15438-2;Q99418;Q99418-2	Filtered	Filtered	Filtered
A8MWD3;O15371	398643	411322	414630
A8MWD9;F5H013;P62308;Q49AN9	212868	209446	211697
A8MWK3;P19022	114563	117922	119423
A8MWX0;Q96HR9	89744.7	92079.3	90452.9
A8MWY0	Filtered	Filtered	Filtered
A8MWY4;Q13029;Q13029-2;Q13029-3;Q5THJ1	Filtered	Filtered	Filtered
A8MX09;O94967;O94967-2;O94967-3	Filtered	Filtered	Filtered
A8MXF4;C9JX84;E7ET33;Q06033;Q06033-2	827292	833911	851827
A8MXP7;E9PAJ8;Q6NUT3;Q6NUT3-2	Filtered	Filtered	Filtered
A8MXP9;P43243	159665	164939	175137
A8MXQ1;P53801	848552	969233	982686
A8MXR0;Q9Y608;Q9Y608-2;Q9Y608-4	28675	24135.2	23757.9
A8MXV4	283564	280458	293265
A8MYC7;B1AMF0;Q8N2K1;Q8N2K1-2	42199.9	Filtered	Filtered
A8MYH2;B7WPL9;D6RBU4;D6RFZ8;E9PGM8;F8W9A8;H7BXU5;O43314;O43314-2;Q6PFW1;Q6PFW1-2;Q6PFW1-3;Q6PFW1-4;Q6PFW1-5;Q6PFW1-6;Q6PFW1-7	Filtered	Filtered	Filtered
A8MYQ9;Q9BZG1	55154.7	56145.6	54860.4
A8MYY3;Q9UPQ9-1	18819.6	19247.3	19333.6
A8MZF9;P55039	46844.4	54056.2	58324.9
A9C4B9;B0V3J0;E7EQB3;Q9BSV6	24667.9	17710.1	20438
A9X3U0;Q96GF1	41219.1	50282.2	52798
A9Z1X7;E9PCT1;Q8IYB3;Q8IYB3-2	47821.8	45589.1	21526.4
B0AZR7;Q13303;Q13303-2	88435.7	90249.8	89678
B0AZS3;B7Z5Z0;B7Z8R1;B7Z9U0;Q9UFF9	24649.1	11283.8	20311.8
B0AZS9;H0YBC7;H7BXD2;O60238	16068.1	16381.3	36128.5
B0QXZ6;O95503	Filtered	Filtered	Filtered
B0QXZ8;B0QXZ9;Q9UGU5	Filtered	Filtered	Filtered
B0QY29;Q9NWS6	Filtered	Filtered	Filtered
B0QY62;Q9UH99	41497.5	37277.7	40117.8
B0QY89;Q9Y262	192009	203421	216241
B0QY95;Q9NQG6	58617.9	54160.8	55310.8
B0QYK0;B0QYK1;Q01844;Q01844-3;Q01844-5	172262	164680	164211
B0QYM8;Q9HBI1;Q9HBI1-2	Filtered	Filtered	Filtered
B0QYW5;B4DU97;F5GYD1;O43808	13445.2	10661.8	11557.9
B0QZ44;P41229;P41229-2	Filtered	Filtered	Filtered
B0QZ88;Q9H7B4	25988.1	53270.1	55179.6
B0QZE2;B7Z293;B7Z3Z1;E7ENI9;F5H449;F6UH50;Q15326;Q2LD45;Q5BJG6;Q5VUI0	Filtered	Filtered	Filtered
B0S7Q4;F8VSH7;F8VX15;H7C4U4;H7C5B5;H7C5D3;Q0P5T2;Q5SQH8;Q5SQH8-2;Q5SQH8-3	8347.81	7872.62	9019.5
B0S872;G8JLE1;Q9UMR5	1.88445e+06	1.88872e+06	2.00858e+06
B0S8I7;Q14657	Filtered	Filtered	Filtered
B0UX83;G3V1Z5;P46379;P46379-2;P46379-3	91721.7	87883.7	91866.7
B0UZZ8	115250	25055	43396.1
B0V043;P26640	178813	175778	170612
B0YJ65;Q86UU1;Q86UU1-2;Q86UU1-3	15587.3	Filtered	10935.2
B1AH87;P30536	119513	116751	119224
B1AH89;Q14166	67985.6	68154.2	76291.4
B1AHH4;B1AHH5;B1AHH6;Q9H7Q0;Q9UIA0	Filtered	Filtered	Filtered
B1AHL2;P23142-4	105842	113571	114968
B1AHQ6;Q9NSP4;Q9NSP4-3	Filtered	Filtered	Filtered
B1AHR1;B1AHR2;B7Z686;Q9UH03;Q9UH03-2	Filtered	Filtered	Filtered
B1AJY5;B1AJY7;O75832	57020.7	59544.2	61628.6
B1AK13;P35914	84107	99477.7	161174
B1AK44;Q9UI95	Filtered	Filtered	Filtered
B1AK51	165.402	170.094	Filtered
B1AK64;Q9HAF1;Q9HAF1-2;Q9HAF1-3	Filtered	Filtered	Filtered
B1AK87;B1AK88;E7EQ40;P47756-2	509792	494675	500456
B1AKB1;B1AKB2;B1AKB4;P19484	22035.4	48723.9	43940.6
B1AKC7;F8W755;Q9UJF2	69973.1	74515.5	72467
B1AKD8;Q5TZA2	28896.9	32046.3	27855.7
B1AKJ5;O43847;O43847-2	41700.2	13500.3	46350.5
B1AKN3;Q9P2R6;Q9P2R6-2	Filtered	Filtered	Filtered
B1AKR6;Q9NP97	110112	126079	127262
B1AKT6;Q9Y483	Filtered	46448	Filtered
B1AKU4;B1AKU5;F5H591;Q92845	Filtered	Filtered	Filtered
B1ALH6;O14832	Filtered	Filtered	63644.9
B1ALK7;B7Z6G2;Q14155-1;Q14155-5	128594	133227	133073
B1ALM5;Q9P0T7	346413	338917	345799
B1ALU3;O95490;O95490-2;O95490-5;O95490-6;O95490-7	140409	136777	134079
B1AM27;F5GZ07;F8W8M9;O14795	60443.2	62194.2	67250
B1AMS2;F5H1J5;Q14141;Q14141-2;Q14141-4	129929	121946	134139
B1AMV7	Filtered	Filtered	Filtered
B1AMW1;P19256;P19256-2;P19256-3	47506	44543.8	49059.1
B1AN99;F8W7P3;P35030;P35030-2;P35030-3;P35030-4	53751.9	52207.5	60059.3
B1ANH0;Q16774-2	114539	113761	109728
B1ANR0;Q13310;Q13310-2;Q13310-3	591128	605980	648112
B1AP13;E9PSH2;H3BLV0;P08174;P08174-2;Q14UF4;Q14UF5;Q14UF6	422634	449654	449664
B1AP58;P15169	225300	212607	198960
B1APM4;P35610	317729	323316	320557
B1APS8;Q96S38	Filtered	Filtered	Filtered
B1APY4	28090.8	29769.6	28238
B1AQP1;E9PME6;P22415;Q7Z5Y1	Filtered	Filtered	Filtered
B1AT46;Q9Y692;Q9Y692-2	589614	576322	550652
B1AVT0;P49760;P49760-3	Filtered	Filtered	Filtered
B1AVU8;P07602	21354376	21918822	21895864
B1AZV3;F5H648;Q03518	84503.2	89698.2	50889.3
B1Q2X3;P21675;P21675-2;P21675-3;P21675-4	Filtered	Filtered	Filtered
B2CI53;B5M453;D3K174;E9PDL9	153680	152460	157990
B2R603;P07910	Filtered	Filtered	Filtered
B2RD65;Q5PSV4	Filtered	32320.3	Filtered
B2RXF5	412636	343687	340378
B2WTI4;Q6NYC1;Q6NYC1-2;Q6NYC1-3	13334.3	14510	14199.2
B3KMX7;B4DV65;F5H1A6;H0YKU8;H0YL81;H0YLB7;H0YLG0;H0YMI4;Q6JHV3;Q9Y6I4	Filtered	Filtered	Filtered
B3KNT8;F5H4R6;F8VY35;H0YIV4;P55209	893735	877184	871818
B3KP14;F5H5I6;H0Y8R1;H0YAK1;Q12849	993035	840657	765925
B3KP49;B4DID0;B4DQH9;Q6VN20	12601.5	Filtered	12031.1
B3KP61;C9K000;P31751;Q0VAN0	10561.3	10505.7	9234.36
B3KPJ4;Q8IXK0;Q8IXK0-2;Q8IXK0-4;Q8IXK0-5	Filtered	Filtered	Filtered
B3KPS6	106517	102614	100289
B3KQ29	Filtered	Filtered	Filtered
B3KQW7;I3L1H5;Q9BZG8;Q9BZG8-2;Q9BZG8-3	10232.9	9569.58	8493.91
B3KR41;Q9Y6D9	162489	161354	95393
B3KRD1;B7Z4D2;Q9NX95;Q9NX95-2;Q9NX95-3;Q9NX95-4;Q9NX95-5	Filtered	Filtered	Filtered
B3KRF7;E9PC66;P17029	Filtered	Filtered	Filtered
B3KRJ9;Q8WXA9-2	99656	95292.2	61748.9
B3KRR0;P07992;P07992-3	28702.5	34749.3	Filtered
B3KRS5;Q92769	90019	92148.9	95408.5
B3KRY5;Q6NZI2	42586	48294.7	59595
B3KS61;O60725	57435.6	87903.8	127440
B3KSH1;B4DMT5;O00303	380510	376639	379416
B3KSI9;Q9NQ48	1.65026e+06	249946	895782
B3KSY9;O75925	19775.1	Filtered	Filtered
B3KT25;Q96S55;Q96S55-2	31231.5	37166.6	37029.6
B3KTC7;P49959	108606	104402	93800.4
B3KTH8;P20265;P20265-2;P20265-3	Filtered	Filtered	Filtered
B3KTI1;P04745;P04746;P19961	170228	310344	87930.9
B3KTM8;H0YMJ0;Q9UBU8-2	54822.3	56116.4	48466.2
B3KTR6;Q9BRK3;Q9BRK3-2	74213.7	66907.2	68937.5
B3KU92;Q6P2P2;Q6P2P2-2	Filtered	Filtered	Filtered
B3KUB4;O43570;O43570-2	25427.5	23852.2	25506.9
B3KUV7;P37287;P37287-2;P37287-3	28337.8	27256.6	25649.7
B3KV94;F5H7Y2;Q9UGL1;Q9UGL1-2	Filtered	Filtered	Filtered
B3KVH8;I3L4Q4;Q9BUL5	Filtered	Filtered	Filtered
B3KVR1;E7ENP4;P14678;P14678-2;P14678-3;P63162	565549	554136	566744
B3KVU0;H7BZK4;Q8WUM9	53857.1	43927.4	45884.2
B3KVZ3;H0Y9E6;Q9H3R5	23346.6	Filtered	Filtered
B3KXE0;P32780	55787.9	52827.5	Filtered
B3KXK7;F8VZA2;Q6P1Q0	92116.1	59211.2	55070.4
B3KXS5;P36776	1.01781e+06	982983	956528
B3KXW5;O43747;O43747-2	110488	110909	109899
B3KXX3;Q9UHW9;Q9UHW9-2;Q9UHW9-3;Q9UHW9-4;Q9UHW9-5;Q9UHW9-6	24852.7	24807.4	21117.9
B3KY39;Q8TCG2	90662	91517.8	95706.2
B3KY94;H3BTV1;O14735	125626	64684.6	71318.9
B3KYA7;Q13188	100551	83957.8	83642.1
B3V0L1;F8WCT1;Q66PJ3;Q66PJ3-2;Q66PJ3-3	268216	253617	243520
B4DDD1;Q8IZ73	Filtered	13702.2	Filtered
B4DDF4;B4DUT8;Q99439;Q99439-2	Filtered	Filtered	Filtered
B4DDF7	433041	423681	431743
B4DDG0;B4DEA5;B4DEB8;B4E171;P41732	90725.2	95014.2	108599
B4DDG7;Q9BXS5;Q9BXS5-2	182598	141393	135628
B4DDK9;Q10469	116155	117774	119420
B4DDP2;E7EV43;Q6NW29	23866.4	Filtered	Filtered
B4DDR3	Filtered	Filtered	29459.6
B4DDT2;O75191	Filtered	Filtered	Filtered
B4DDT7;F8VYY9;F8W9D1;H0YHF8;P54619	52683.4	45952.7	46720.7
B4DDV1;Q13325	20986.7	20172.8	23524.7
B4DDV3;Q8N6T7;Q8N6T7-2;Q8N6T7-4	Filtered	Filtered	Filtered
B4DDV7;B7ZM03;C9J121;C9J2P9;Q75N03	Filtered	Filtered	Filtered
B4DDY7;B4DNN0;Q5T4K2;Q5T4K3;Q5T4K4;Q9NY26	Filtered	Filtered	18675.7
B4DE11;E7EW45;P78381;P78381-2	Filtered	7835.32	Filtered
B4DE98	27233.2	23676.4	23424.6
B4DEH8;G3V4T2	Filtered	Filtered	Filtered
B4DEI4;B4DKT0;Q9H8Y8	46310.2	40570.6	38461.5
B4DEN4;E7EV05;E9PFU9;Q8WV99;Q8WV99-2	280625	272061	246390
B4DEX5;C9JA75;E9PDK8;H0Y4B0;O43414;O43414-2;O43414-3	38338.8	76788.7	45848.5
B4DF08;B4DJB7;B7WPA5;B8ZZN1;Q96CS7;Q96CS7-2;Q96CS7-3	345045	271911	508124
B4DF14;P43003;P43003-2	283348	244159	251685
B4DF64;Q68CZ6	17169.2	19880.9	15059.8
B4DFH6	Filtered	217967	211404
B4DFI4;E9PQZ8;H0YEM7;O75143;O75143-2;O75143-3	Filtered	8378.05	Filtered
B4DFQ6;B4DHT5;Q96CM8	65189.8	69906.1	72799.3
B4DFR4;B4DGM3;C0IMW5;Q969G3;Q969G3-2	24437	20850.6	17933.9
B4DFT0;H3BPN6;H3BT78;Q6PHR2;Q6PHR2-2;Q6PHR2-3	Filtered	Filtered	Filtered
B4DFW2;P16035	Filtered	Filtered	Filtered
B4DG42;C9J5M0;C9JC07;C9JJV6;C9JZL8;Q96S97	46325.9	40802.6	52207.7
B4DG62;P19367	868198	970681	1.00721e+06
B4DGI9;E9PGY0;F5H6Z6;Q99081;Q99081-3	3599.49	3205	Filtered
B4DGM2;Q9H875	Filtered	Filtered	Filtered
B4DGM4;Q9NX70	Filtered	1536.46	Filtered
B4DGR6;Q8NEZ3	31691.6	22813.8	21511.2
B4DGU4;P35222	298968	318076	343234
B4DGX2;P48426	44120	40213.9	40584.7
B4DH44;P45985;P45985-2	Filtered	Filtered	Filtered
B4DH52;P78347;P78347-2;P78347-3;P78347-4	891532	874897	863808
B4DH53;Q66K74	42321	41077.2	44505.3
B4DH70;Q9UKB1;Q9UKB1-2;Q9UKB1-3	60083.6	60685.8	54957.1
B4DHE8;Q96DH6;Q96DH6-2	67114.8	62663.8	70910.8
B4DHJ7;Q12983	11646.5	13468.3	Filtered
B4DHN0;P28482	75022.9	74495.9	71392.3
B4DHP5	551996	781372	441908
B4DHY4;B4DT77;P20073;P20073-2	1.664e+06	1.60632e+06	1.58215e+06
B4DI13;B7Z821;E9PCU2;H0Y3I0;H0Y818;P40692	Filtered	Filtered	Filtered
B4DI41;Q9UIS9;Q9UIS9-4;Q9UIS9-5;Q9UIS9-7;Q9UIS9-8;Q9UIS9-9	44328	Filtered	40268.4
B4DI61;O00622	109746	104664	107408
B4DII8;P05067;P05067-8	378046	394069	399763
B4DIJ9;Q59FJ7	83309.6	94177.6	96352.6
B4DIQ0;O60942	39712.2	35654.6	35647.6
B4DIR7;Q99504	Filtered	919.719	Filtered
B4DIV9;B7Z3B1;Q9Y2E8;Q9Y2E8-2	Filtered	Filtered	Filtered
B4DJJ3;Q6NXT6;Q6NXT6-2	14537.9	27664.9	30815.4
B4DJL6;B4DVD5;B4DVT3;H3BRY6;Q96SY0;Q96SY0-3	6301.19	7518.94	7859.42
B4DJN2;B4DMK1;O95258;O95258-2	36268	27810	23904.7
B4DJP7;P62318	300935	347576	420195
B4DJU2;D3DWC4;H7C1W3;Q86VZ5;Q86VZ5-2	Filtered	16196.5	Filtered
B4DJV2;O75390	4977455	4682617	4.56421e+06
B4DK30;Q15029	252521	260854	260125
B4DK60;Q8TDN4;Q8TDN4-2	27429.1	Filtered	Filtered
B4DK95;Q9C0D3	Filtered	Filtered	Filtered
B4DKB9;E7EWT6;Q9P1Z2;Q9P1Z2-2;Q9P1Z2-3;Q9P1Z2-4	Filtered	Filtered	11927.1
B4DKC2;Q7L099;Q7L099-2;Q7L099-3;Q7L099-4	65043.5	61048.6	66337.1
B4DKJ1;Q14CX5	Filtered	Filtered	Filtered
B4DKK6	284476	291044	276425
B4DKR6;O15234	14411.4	18602.6	10535.1
B4DKX7;Q8IW45;Q8IW45-2	19905.1	20751.1	19544.2
B4DKY1;P49589;P49589-2;P49589-3	62689.3	81595.3	50694.5
B4DL13;Q9UL03;Q9UL03-3	Filtered	Filtered	Filtered
B4DL14	15017.4	14825.4	11751.9
B4DL54;B4E1A0;H0YHI0;P49356	Filtered	Filtered	105023
B4DLC0	86571.4	104104	108840
B4DLE8	7423.93	Filtered	Filtered
B4DLH4;Q9H910	30838.8	33467.4	39266.5
B4DLP8;B4DV66;Q9BWT1;Q9BWT1-2;Q9BWT1-3	Filtered	Filtered	Filtered
B4DLP9;Q7KYR7	138880	140488	130657
B4DLT4;F6UYM1;P23443;P23443-2	29716	22925.6	26903.7
B4DLX8;C9J453;O15344;O15344-2	Filtered	34425.4	Filtered
B4DLZ9;F8WB55;Q5TDE7;Q5TDE8;Q5VTB9	Filtered	Filtered	Filtered
B4DM24;C9J9E2;E7ETR1;Q8NCB2;Q8NCB2-2;Q8NCB2-3	Filtered	21180.7	25835.6
B4DMI6;Q5MNZ6	43924.7	46270.1	47650.5
B4DMU0;P32322	136771	144413	145242
B4DMV3;H7C5G1;Q2TAA2	Filtered	Filtered	Filtered
B4DN34;Q96GC5	338634	322802	314581
B4DN50;P17302	109097	109055	117179
B4DN67;Q5W0F9;Q5W0G0;Q96J84;Q96J84-2;Q96J84-3	7739.46	12157.7	27351.2
B4DN88;E7ETU5;P29558;P29558-2	34206.7	74855.8	31045.2
B4DNH5;P58317	Filtered	Filtered	Filtered
B4DNI1;C9K0U0;Q7Z422;Q7Z422-2;Q7Z422-3;Q7Z422-4	Filtered	Filtered	Filtered
B4DNJ6;Q9Y3F4	116881	116996	114486
B4DNR3;F8W9U3;Q96IU4	7704.8	7058.86	Filtered
B4DNX9;Q14592	Filtered	Filtered	Filtered
B4DP11;Q15185	392953	376526	392114
B4DP24;Q9BW60	23563.4	24117.4	23251.4
B4DP27;Q15363	149734	140785	144890
B4DP36;E7ENK0;E9PBE5;Q13137	55543.2	89013.7	56954.7
B4DPC1;F5H869;H0Y6D8;P20226	Filtered	Filtered	Filtered
B4DPR4;C9J494;Q9H000	74790.7	72127	74252.2
B4DPR9;Q99551	34985.3	40647.8	43023.3
B4DPV8;Q8NC54	117830	123134	188704
B4DPW7;E7EQF4;E9PDG2;G3XAB1;H7C3C0;Q9HBG6;Q9HBG6-2;Q9HBG6-3;Q9HBG6-4	371139	73397.8	78134.5
B4DPY8;F6TTN0;O94842	10352.5	9923.68	10252.1
B4DQ14;Q9BY44	133471	131327	135772
B4DQ19	77301.2	73062.1	47164.7
B4DQ42;E7ENF4;Q9HC62	30577.9	32203.3	289003
B4DQ47	Filtered	Filtered	Filtered
B4DQE4;P10588	Filtered	Filtered	Filtered
B4DQI6;B4DUA9;Q13595	57731.1	59234.5	55708.9
B4DQJ8;P52209	134326	139346	144358
B4DQK0;Q96BI3	179821	168949	175083
B4DQL2;Q9HD23;Q9HD23-2	27503.5	17218.5	22902.4
B4DQM7;Q15036	Filtered	Filtered	Filtered
B4DQQ4	Filtered	Filtered	Filtered
B4DR12;E9PB19;O60291;O60291-2;O60291-3;O60291-4	2511.77	2621.89	2501.63
B4DR21;Q14703	Filtered	Filtered	13393.2
B4DR31	39694.3	37011.2	35275.5
B4DR61;P61619	139364	138287	141887
B4DR70;P35637;P35637-2	500001	485843	485396
B4DR80;Q9Y6E0;Q9Y6E0-2	168737	158644	161376
B4DR87;Q02809	383996	390277	447820
B4DRD7	Filtered	Filtered	Filtered
B4DRF9;P18846	381010	361259	Filtered
B4DRL5;Q5JVZ5;Q96JJ3	46784.1	56778.1	40487.1
B4DRL9;P24386	Filtered	Filtered	Filtered
B4DRN7;F5H2A1;Q86YS7;Q86YS7-2	185262	201269	203203
B4DRN8;Q2TB82;Q5W0Z9;Q5W0Z9-3	126646	121714	131550
B4DRT2;Q92552	256906	249233	257843
B4DRY3;Q7L9L4;Q9H8S9	50077.7	57042.3	51933.2
B4DS44;Q8N1B4	54373.4	59814.1	53972
B4DS52;C9JY70;H0Y997;Q96J42;Q96J42-2	161662	108010	118022
B4DS80;F5GZN7;Q86V97;Q8WVZ9	Filtered	Filtered	Filtered
B4DS82;Q14457	116024	116102	151017
B4DSD4;Q5T8U9;Q5T8V1;Q8N4J0	Filtered	Filtered	7312.56
B4DSM5;G3XAG1;Q96ME7	Filtered	Filtered	16516.2
B4DSN4;E7EML5;E7ET57;Q8NHM5;Q8NHM5-2;Q8NHM5-3;Q8NHM5-4	Filtered	Filtered	Filtered
B4DSS3;F5H5A3;Q8IVH8;Q8IVH8-2;Q8IVH8-3	34727.7	40646.4	41680.1
B4DST0;O43463	Filtered	76241.1	Filtered
B4DT16;F5H2Y4;Q9H165;Q9H165-2;Q9H165-6	Filtered	Filtered	Filtered
B4DT31	Filtered	Filtered	Filtered
B4DT35;Q7Z3B4	122350	117486	119649
B4DT67;Q9NUQ6;Q9NUQ6-2	27832	46364.7	29555.5
B4DT74;I3L295;O75352;Q1HDL3;Q96K24;Q9H3L2	114204	121337	128102
B4DTA3;Q96AG3	20016	18603.4	18294.9
B4DTC3;H7BXN2;Q14103-2;Q14103-4	31.2373	23.1453	Filtered
B4DTE8;C9J7K9;O15162	212936	209833	195857
B4DTG2;P26641	1.88839e+06	1.90677e+06	2.01142e+06
B4DTG6;Q8ND56;Q8ND56-2	50499	47511.4	51162.4
B4DTU0;Q13740;Q13740-2	231934	245068	247318
B4DTZ6;P19634;Q5TBB2;Q5TBB3	26143.7	27253.5	29217.7
B4DTZ7;Q68DH5	43313.1	43498	31294.6
B4DUB1;H0Y3K1;Q9BWU1;Q9BWU1-2	61059	60482.4	71274.4
B4DUD5;E7EWR4;P33240;P33240-2	99984.1	99070.1	57171.1
B4DUE9;F5GY47;Q13530	51608.8	58382.3	57583.7
B4DUS5;Q96B01;Q96B01-2;Q96B01-3	Filtered	Filtered	Filtered
B4DV38;E9PC61;H3BQM0;Q8NDF8	Filtered	Filtered	Filtered
B4DV79;F8W8C8;P55884;P55884-2	369174	360679	341285
B4DVE7;E9PDK5;P50995	2.04879e+06	2.05689e+06	2.02211e+06
B4DVN1;O75190	157449	154997	165294
B4DVP2;Q9Y478	22894.5	19167.1	19443.8
B4DVQ4;Q86Y37;Q86Y37-4	Filtered	Filtered	Filtered
B4DVQ5;Q99613	211366	237043	237954
B4DVZ5;Q92791	144697	152074	162911
B4DW92;Q86WQ0	Filtered	Filtered	Filtered
B4DWD7;Q53TN4	54620	Filtered	Filtered
B4DWI1;Q9UJ83	332988	335338	328471
B4DWS0;C9JGX3;Q96F24;Q96F24-2	Filtered	58841.1	Filtered
B4DWT2;Q5JW54;Q5JW58;Q9H410;Q9H410-2;Q9H410-3	Filtered	Filtered	Filtered
B4DWW1;P40616	91457.3	86128.4	87097.4
B4DX32;F5GXB3;O60870	14045.8	Filtered	11658.4
B4DX68;Q96KB5	22611	Filtered	26388.5
B4DXA1;I3L3Y9;I3L4X7;Q13227	217639	223194	260429
B4DXL3;H3BPM8;Q13286;Q13286-2;Q13286-3;Q13286-4	161565	212958	314080
B4DXP5	62119.9	63471.1	64094.9
B4DXR9;B4E159;D6RB60;D6RGC2;D6RIY0;E5RGH0;E9PN20;F5H663;Q15928;Q3SXZ3;Q8IYB9;Q8TB69	Filtered	Filtered	Filtered
B4DY08	2.56372e+06	2.38262e+06	2.54727e+06
B4DY26;F8W1R9;P36897;P36897-2;P36897-3	54449.2	67323	66187.4
B4DY38;E7EPF0;Q9NP64;Q9NP64-2	Filtered	Filtered	Filtered
B4DY81;Q9UNS2	38632.5	38888.3	34866.9
B4DYB4;Q8NFH5	124111	123368	119192
B4DYM7;Q6UVJ0	76457.1	56630.2	338856
B4DZC3;Q9H0D6;Q9H0D6-2	50817.3	47743.8	50381.9
B4DZI8;P35606	406401	412743	445830
B4DZM7;E7ERJ8;E9PFK9;H7BYE7;Q3HKR1;Q9UJ41;Q9UJ41-2;Q9UJ41-3	92246.1	91053	125564
B4DZV1;C9K053;F5H175;G5E9H3;Q49AM3;Q49AM3-2	76225.4	68481.9	66627.1
B4DZX6;G8JLA9;H7BYZ6;Q9Y575;Q9Y575-2	14101.8	Filtered	Filtered
B4E040;P11234	194261	187683	188756
B4E0K5;Q16539	18072.8	69959.6	19016.2
B4E0K9;G5E928;O00754	3.22902e+06	3.13447e+06	3.24514e+06
B4E0P8;Q04323	39016.2	40810.9	42149.8
B4E0T7;Q96II8;Q96II8-2	35972.7	37858.9	35442.1
B4E0X8	60705.1	59384.6	62188.3
B4E0X9;P48553	12709	Filtered	12042.5
B4E0Y9;Q8NBY1;Q9P289	164588	144538	163100
B4E1D3;P02675	344498	218308	222851
B4E1G1;Q9BUN8;Q9BUN8-2	303091	302656	311016
B4E1J0;F5H2F6;F5H6Z1;Q96AQ6;Q96AQ6-2;Q96AQ6-3	40425.8	39534.3	47186.8
B4E1K0	46855.3	43382.3	41412.3
B4E1N7;P01106	10210.5	Filtered	Filtered
B4E1S6;P31431	82921.8	124981	121767
B4E1W4;E7EU88;Q9P2N6;Q9P2N6-2;Q9P2N6-3;Q9P2N6-4;Q9P2N6-5;Q9P2N6-6	Filtered	Filtered	Filtered
B4E241;P84103	1.13871e+06	1.10098e+06	1.17068e+06
B4E2D5;E7ER46;F5GX46;Q8NEM7;Q8NEM7-2	16965.5	17631.6	1.38146e+06
B4E2G8;F6XBD8;P35221;P35221-2	11779026	11747241	11665331
B4E2J0;Q6P2Q0;Q9NP78;Q9NP78-2	104042	102790	101270
B4E2N0;Q8WZA0	98339.1	Filtered	8224.83
B4E2P0;G3V4A5;O75586	Filtered	Filtered	Filtered
B4E2P2;C9JA28;Q9UNL2	107506	102974	107914
B4E2S7;P13473-2	18296592	18109090	18815722
B4E2V5;P27105	1.83936e+06	1.81118e+06	2182938
B4E2X3;Q8N6R0	1.42683e+06	43716.4	Filtered
B4E3E5;Q92997	115656	140258	149530
B4E3J8;F5H277;H0YGN4;Q15208;Q9Y2H1	Filtered	Filtered	Filtered
B4E3T4;F5H357;Q93062;Q93062-2;Q93062-3;Q93062-4;Q93062-5	Filtered	Filtered	Filtered
B4E3W0;G5E9D4;Q96EB1;Q96EB1-2	Filtered	8095.96	Filtered
B5B2M6;E7EMS4;E7EP33;O95644;O95644-2;O95644-3;O95644-4;O95644-5;O95644-6;O95644-8	50103.6	64524.6	50964.7
B5MBW9;H0YBG0;Q8WYQ3	137292	117142	136493
B5MBX0;Q96FF9	Filtered	Filtered	Filtered
B5MBZ0;Q9HC35	614838	36319.8	34324.9
B5MBZ5;Q9HCN4;Q9HCN4-2;Q9HCN4-3	12809.3	10871.3	14191.6
B5MC00	79742	73571.4	71044.6
B5MC02;G5E9C6;Q8NFT2;Q8NFT2-2	290079	223455	141476
B5MC40;Q86YP4;Q86YP4-2	11329	11460.3	12262.6
B5MC53;B5MCF8;P39210	23970.1	Filtered	62760.5
B5MC72;Q96DZ1	97617.7	92974.3	87746.4
B5MCA1;Q96G28;Q96G28-2	Filtered	Filtered	Filtered
B5MCD7;O43759;O43759-2	150979	151234	162322
B5MCF9;O00541	52174.5	49264.7	104761
B5MCG1;P84101	27411.9	26626.6	24914.2
B5MCQ5;B7Z254;F8WA83;Q15084;Q15084-2	6240463	6.18059e+06	6179893
B5MCW3;H7C127;H7C128;H7C179;Q9H0E9;Q9H0E9-2;Q9H0E9-4	Filtered	Filtered	Filtered
B5MDE0;Q96AA3	63671.1	56789.5	77272.2
B5MDF5;P62826	746535	755053	909467
B5MDL5;F6TXG5;P53778	Filtered	Filtered	Filtered
B5MDQ0;Q2NKX8	Filtered	29439	Filtered
B5MDU6;Q9H6V9;Q9H6V9-2	98577.4	103381	99788.9
B5ME50;E7EMY0;E7EP16;E7ERA9;Q71SY5;Q71SY5-2;Q71SY5-3;Q71SY5-4;Q71SY5-5	Filtered	Filtered	Filtered
B5ME91;Q53EL6	126795	121293	116765
B5ME97;E7EW69;E7EX04;Q9P0V9;Q9P0V9-2	58283.5	62767.3	61825.4
B5MEB7;Q8WXE1;Q8WXE1-2;Q8WXE1-3	36503.8	37907.9	149168
B5MEC7;Q9BZL4;Q9BZL4-2;Q9BZL4-3;Q9BZL4-4	Filtered	10487.9	11608.8
B5MEE5;C9JLZ9;C9JM97;C9K0L0;F8W9P9;Q8WXG6;Q8WXG6-2;Q8WXG6-3;Q8WXG6-4;Q8WXG6-5;Q8WXG6-6;Q8WXG6-7	4086.69	3701.87	4791.78
B5MEG5;E7EN22;E7EST9;E7ETS0;E9PEG8	49526.2	46409.7	44441
B6ZDS1;C9J4X5;Q9H160	Filtered	Filtered	Filtered
B7WNP8;Q7Z392;Q7Z392-3;Q7Z392-4	24867.3	23005.7	27672.1
B7WNT5;D4PHA3;E2GH20;E9PDK3;F8W742;F8W7T5;G8JLE2;H0YAR8;H0YBC8;H0YBP2;H0YEE5;P36402;P36402-10;P36402-11;P36402-12;P36402-13;P36402-14;P36402-15;P36402-16;P36402-2;P36402-3;P36402-4;P36402-5;P36402-6;P36402-7;P36402-8;P36402-9;Q5JRY3;Q5JRY4;Q5JRY5;Q9NQB0;Q9NQB0-10;Q9NQB0-2;Q9NQB0-3;Q9NQB0-4;Q9NQB0-5;Q9NQB0-6;Q9NQB0-7;Q9NQB0-8;Q9NQB0-9;Q9UJU2;Q9UJU2-3;Q9UJU2-5;Q9UJU2-6	Filtered	Filtered	Filtered
B7WP27;Q9HCG8	51617.5	49144.1	46295.7
B7WPG3;C9J9G0;Q5JB52;Q8WVV9;Q8WVV9-4	114856	110469	94828.3
B7Z1I8;O75461	Filtered	Filtered	Filtered
B7Z1J2;D6RAC5;D6RH18;E9PB74;E9PDA8;P81877;Q9BWW4;Q9BWW4-2;Q9BWW4-3	Filtered	Filtered	Filtered
B7Z1J9;Q8NB37	100303	90463.1	98776.2
B7Z1T1;H7BYE5;O00258;O00258-2	49918.4	53627.5	50862.7
B7Z1T6;E5RHV0;E5RHY8;E5RI52;Q6NTE8;Q6NTE8-2	Filtered	Filtered	Filtered
B7Z1Y4;B8ZZV9;B8ZZX2;Q9H8M1	5407.43	5780.27	6575.4
B7Z202;E9PEY4;F5GZG4;G5E9F6;O60941	85374	83862.8	82075.7
B7Z287;Q9NP50	15104.8	16182.5	14633.8
B7Z2A4;P18433;P18433-2;P18433-3;P18433-4	50992.9	15153.8	66948.6
B7Z2A7	32384.8	80653	30667.8
B7Z2D6;P35520;P35520-2	65928.9	63817.1	41044.9
B7Z2I1;C9J3K0;F5H6X3;Q96JH8;Q96JH8-1	Filtered	Filtered	Filtered
B7Z2L7;B7Z2U2;F5GXH5;F5H3S6;Q6ZVM7;Q6ZVM7-2;Q6ZVM7-3;Q6ZVM7-4	84973.4	128968	127627
B7Z2R4;E9PEH6;G5E9K6;O43556	Filtered	Filtered	34191.2
B7Z2S5;E7ESI6;Q16881;Q16881-3;Q16881-4	56253.2	51779.3	59846.6
B7Z2T7;O15075;O15075-2;Q5VZY9	8934.79	8910.62	9388.92
B7Z2Y2;B7Z7N2;F5H1E5;Q14746;Q14746-2	42123	41230.2	48872.2
B7Z2Y5;O75582	Filtered	Filtered	23683.8
B7Z355;C9IZI7;C9J7Z4;G5E9Q3;Q8NCE0;Q8NCE0-2;Q8NCE0-3	Filtered	Filtered	Filtered
B7Z367;D6RJ07;Q9UL40	20814.6	14504.7	13942
B7Z382;P49902	11143.6	Filtered	14177.9
B7Z3K8;Q9Y2Z9	69704.6	66259.4	63613.5
B7Z3N3;Q6P1A2	Filtered	Filtered	Filtered
B7Z3P9;B7Z4N7;F5H2Q9;F5H7Q0;G5E9G3;Q8IXQ5;Q8IXQ5-2	Filtered	Filtered	Filtered
B7Z468;B7Z574;E7ES10;E7ESM9;E7EVY3;E9PCH5;G5E946;G5E9D3;P20810;P20810-2;P20810-3;P20810-4;P20810-5;P20810-6;P20810-7	Filtered	Filtered	Filtered
B7Z473;F5GYS0;H0YGC8;Q8NCS7;Q8NCS7-2;Q8NCS7-3	Filtered	Filtered	Filtered
B7Z4B9;Q86SQ9;Q86SQ9-2;Q86SQ9-3	42255.4	39001	40296.8
B7Z4K6;O00115	4429099	4222304	4413634
B7Z4L1;B7Z4U3;C9JU30;E7EPD9;H7BXS2;Q9NRC1;Q9NRC1-4	97776.1	83300.4	78869.7
B7Z4M2;O75554	Filtered	Filtered	Filtered
B7Z4Q3	171341	169117	191792
B7Z4R5;E7EPF7;Q99571	399825	398475	430219
B7Z4S8;Q99538	2.90642e+06	2.81075e+06	2.9134e+06
B7Z4U0;Q969M1	Filtered	Filtered	Filtered
B7Z4V2;P38646	5.28429e+06	5.50433e+06	5.70282e+06
B7Z4V9;Q9BT40;Q9BT40-2	74805.4	76269.9	72801.6
B7Z4X2;E7EQB2;E7ER44;P02788	146185	153576	158584
B7Z4Y6;P05186;P05186-2	Filtered	Filtered	Filtered
B7Z549;F5H7E1;P19827	106228	101392	108480
B7Z560;Q9NV88;Q9NV88-2	11994.9	14397.5	13641.4
B7Z5B0;E7EMV7;E7EPY1;E7ERB0;E7ET96;E7EW15;F5GYD7;F5H4X3;Q15025;Q15025-2;Q6N077	Filtered	Filtered	Filtered
B7Z5J4;Q9UI42;Q9UI42-2	Filtered	Filtered	Filtered
B7Z5N6;B7ZBU3;E7EQG4;E9PDG7;H0Y6Y1;Q5T1V6;Q5T1V6-2;Q5T1W1	Filtered	Filtered	Filtered
B7Z5R1;G3V2I6;G3V3X1;P31749	Filtered	10649.7	10501.9
B7Z5U5;Q9H4Z3	Filtered	Filtered	Filtered
B7Z5W1;Q9Y624	91919.7	94370.1	96818.4
B7Z5Z2;P62070	335732	323183	394626
B7Z660;C9JS40;Q5VZ89;Q5VZ89-2;Q5VZ89-3;Q5VZ89-5;Q5VZ89-6	Filtered	Filtered	Filtered
B7Z6B8;Q16698	113599	124663	146442
B7Z6C0;H0YFA4;P52943	Filtered	Filtered	Filtered
B7Z6F5;C9JFB2;Q9Y548	Filtered	Filtered	Filtered
B7Z729;Q92484	671020	694955	688550
B7Z765;Q9UL01	44367.7	47097.4	47091.1
B7Z7D3;Q9BXW6	Filtered	Filtered	Filtered
B7Z7P8;P62495;Q96CG1	162226	158705	156258
B7Z7V7;F5GYW7;G5E9F1;Q96RG2;Q96RG2-2	Filtered	Filtered	Filtered
B7Z7X8;Q8NHH9	241678	231985	233694
B7Z800;P55263;P55263-2	5562.43	4777.82	14011.4
B7Z806;P13807;P13807-2	131515	121198	50961
B7Z817;Q15392	269545	255964	252460
B7Z831;D2DFB0;F5H4A4;Q9NZH0	66871.2	67539.3	66626.4
B7Z8C9;Q5TAQ9	34047.3	34676.7	29796.6
B7Z8G2;Q13451	Filtered	Filtered	Filtered
B7Z8R4;E9PCX3;Q15723;Q15723-1;Q15723-2;Q15723-3	Filtered	Filtered	Filtered
B7Z8T0;F5H203;Q00536	86338.4	49245.9	55115.2
B7Z8V9;B7Z929;Q9H336	24420.6	30166.7	32473.2
B7Z8Y7;O94762	106619	94754.9	85171.3
B7Z976;O60704	15690.2	16346.3	Filtered
B7Z984;F8VPI1;F8VPZ7;F8VQQ5;F8VQW0;F8VR05;F8VSI7;F8VVJ4;F8VX73;F8W086;F8W1G3;F8W201;P55061	48975.3	49998.1	36457.1
B7Z9G5;Q5VW32	75314.2	70534.1	75789.3
B7Z9I3;O75787	116076	113901	126430
B7Z9L2	Filtered	Filtered	Filtered
B7ZAA0;E7EQE2;E9PC65;E9PH88;P54277;P54277-3;Q3BDU3	Filtered	Filtered	Filtered
B7ZAS8;F5H2X7;H0Y5D5;Q5SYW2;Q9BTG3;Q9ULV3;Q9ULV3-2	Filtered	Filtered	Filtered
B7ZAX5;Q01415;Q01415-2	Filtered	Filtered	Filtered
B7ZB80;P21953	294693	305736	309305
B7ZC38;Q9NR46	43563.3	43744.3	41778
B7ZKJ8;E9PGN5;F5H194;Q14624;Q14624-2	175760	171457	182222
B7ZKK9;Q16537	43225.3	37589.4	37311.4
B7ZKM0;Q15020	60660.3	52954.6	48107.6
B7ZKM8;O95487;O95487-2	66190.2	70554.5	58533.3
B7ZKN0;Q92859;Q92859-2;Q92859-3	60516.6	57763.9	68723.3
B7ZKQ9;Q8WTV0-2;Q8WTV0-4	1.03744e+06	1.07459e+06	1.10988e+06
B7ZKS7;Q86UV5	20889.6	Filtered	23533.2
B7ZKT7;Q9BQS8	668719	654494	688668
B7ZKZ4;E7EWY8;P43694	5394.78	4857.88	Filtered
B7ZL00;D6REX3;H7C2W3;O94979;O94979-2;O94979-3;O94979-4;O94979-6;O94979-8	116456	110710	105159
B7ZL11;C9JY66;Q9BZ95;Q9BZ95-2;Q9BZ95-4	74852.9	140878	Filtered
B7ZL31;F8WBF5;P49759;P49759-3;Q9HAZ1	Filtered	Filtered	Filtered
B7ZL88;Q8N8Q8	12758.1	38844.5	12719.9
B7ZLE7;P53355;P53355-3	23660.4	20860.8	Filtered
B7ZLM8;H0YNM1;P30047	Filtered	Filtered	Filtered
B7ZLN5;Q17RB6;Q9ULD4	Filtered	Filtered	Filtered
B7ZLQ8;E5RJM0;Q17RY0;Q17RY0-2	27096	Filtered	Filtered
B7ZLX3;E7EUA5;F5GWS0;Q7Z460-2;Q7Z460-3	49530.7	45408.9	46267.2
B7ZLZ2;Q9BZQ6	65721.7	79182	63138.6
B7ZM82	Filtered	Filtered	Filtered
B7ZMG0;E9PGC5;F5GXI4;Q15262;Q15262-2;Q15262-3;Q5TG12	26385.8	26180.6	27223.1
B7ZMI4;E7EPZ1;F5H1U9;O75970;O75970-2;O75970-3	Filtered	Filtered	Filtered
B8QGS9;Q99959;Q99959-2	49111.6	50562.3	56386.3
B8ZZ87;H7C173;Q6NZ67	201686	130794	129866
B8ZZA1;B8ZZQ6;B8ZZW7;H7C2N1;P06454;P06454-2	3148.44	1939.12	3909.9
B8ZZC8;B8ZZE3;B8ZZY8;E7EMN2;F5GXZ1;F5H4E8;Q9NRN9	Filtered	Filtered	Filtered
B8ZZD4;E7ENV2;Q86VP1;Q86VP1-2	2587.3	7934.39	7007.72
B8ZZF6;C9J128;C9J173;C9J2Z6;E7ENF2;E7ET59;E7EUX4;P49441	Filtered	Filtered	Filtered
B8ZZJ1	67298.1	72944.9	69385.2
B8ZZJ9	189598	144526	127125
B8ZZN6;P63165	621952	565321	598194
B8ZZT7;Q9UK76;Q9UK76-2	25513.6	16029.5	18847
B8ZZV6;B8ZZY4;Q8WV83;Q8WV83-2	Filtered	Filtered	Filtered
B8ZZW9;Q8N3F0;Q8N3F0-2	Filtered	Filtered	Filtered
B9A018;Q53GS9	96219.1	88580.8	84568.7
B9A054;Q8TEB9;Q8TEB9-2	117414	112353	115658
B9EG97;E9PEP7;P08048;P08048-2;P08048-3;P17010;P17010-2	Filtered	Filtered	Filtered
B9EGA3;Q92925;Q92925-2;Q92925-3	26700.7	22128.4	17965.6
B9EGP5;F8VWA6;F8W1Z6;Q7Z3U7;Q7Z3U7-2;Q7Z3U7-3;Q7Z3U7-4	14978	12386.7	Filtered
B9EK38;E7EQJ8;Q6GYQ0;Q6GYQ0-2;Q6GYQ0-4;Q6GYQ0-5;Q6GYQ0-6	Filtered	21911.2	Filtered
B9ZVR8;C9JV64;Q70CQ2;Q70CQ2-2;Q70CQ2-3	60799.7	65360.8	61947.5
B9ZVV8;E7EN68;Q53H47	Filtered	Filtered	Filtered
C0H5Y7;Q16611	112233	96229.8	109722
C4AM86;Q92764	91483.3	99767.6	Filtered
C4AMA3;I3L2N9;O76011	Filtered	Filtered	Filtered
C4AMC7;Q6VEQ5	388740	378521	384144
C4P093;C4P0B0;E2QRA4;F5H1F1;Q5T409;Q9NRI5;Q9NRI5-2;Q9NRI5-3;Q9NRI5-4;Q9NRI5-5;Q9NRI5-6;Q9NRI5-7;Q9NRI5-8	Filtered	Filtered	Filtered
C6GKU9;Q96HR3	Filtered	Filtered	Filtered
C9EI59;Q9H7T9	Filtered	Filtered	Filtered
C9IY53;F8W8D3;Q14493	Filtered	6422.92	6334.43
C9IYG0;H7C1Z7;H7C270;Q9GZU7;Q9GZU7-2	84726.2	78701.9	74037.8
C9IYL4;P29083	20294.3	17145.9	16565.4
C9IYN9;E2QRN5;F8WEJ9;Q6GMV2	Filtered	Filtered	Filtered
C9IZI4;H7BXR8;H7C5Z9;Q14CB8;Q14CB8-2;Q14CB8-3;Q14CB8-5;Q14CB8-6;Q14CB8-7;Q8NA01	16770.6	18349.3	20136.4
C9IZU6;Q969T4;Q96LR5	Filtered	Filtered	49927.1
C9J016;Q9H977	Filtered	Filtered	Filtered
C9J066;Q8N4C6;Q8N4C6-10;Q8N4C6-2;Q8N4C6-4;Q8N4C6-7	646000	653281	693744
C9J0E4;P01040	66503.4	63231.2	59468
C9J0F0;E7ETP1;E9PFD3;F5GYL1;G5E965;G5E9V8;H0Y882;Q8NAN6;Q9H334;Q9H334-2;Q9H334-3;Q9H334-4	Filtered	Filtered	Filtered
C9J0I9;Q86WB0;Q86WB0-2	Filtered	Filtered	Filtered
C9J0J0;Q96EE4	Filtered	9918.14	Filtered
C9J0J7;G5E9Q6;P35080-2	81793.1	74999.5	80759.1
C9J0Q5;C9J239;C9J7T7;C9JE98;C9JFD3;C9JJF6;Q9Y618;Q9Y618-3;Q9Y618-4;Q9Y618-5	Filtered	Filtered	Filtered
C9J0W7;C9JNM5;F8W782;Q96A54	Filtered	Filtered	62516.8
C9J114;C9JV08;P17181;P17181-2;P17181-3	Filtered	Filtered	Filtered
C9J154;F2Z3A6;F8W8C2;Q9HBM0	77593.6	51088.4	49540
C9J164;C9K0J5;Q70E73;Q70E73-2;Q70E73-3;Q70E73-4;Q70E73-5;Q70E73-6;Q70E73-7;Q70E73-8;Q70E73-9	10389.6	9131.31	9670.49
C9J1C6;C9J391;F8WBU5;H7C426;Q9P0P0	Filtered	346426	5619.42
C9J2F8;Q5JS54	Filtered	Filtered	Filtered
C9J2G7;C9JCG1;C9JRS3;C9JTC5;E7EN86;E7ER34;E9PJF2;E9PLN4;E9PLS7;E9PMY8;E9PPB0;E9PS81;P52747;P52747-2	11481.9	9135.65	Filtered
C9J2K4;Q16864	612588	618010	625520
C9J2P0;C9J8K2;H7C061;P51965	Filtered	Filtered	Filtered
C9J2U4	209759	235304	238895
C9J2Y9;P30876	58446.1	67067.2	69267.6
C9J384;E9PHS3;Q9BQ75	87593.1	85384.5	83839.9
C9J3D7;E7EQF2;Q9UKG9	Filtered	21199.6	52486.9
C9J3F9;C9JW41;Q9NQ55;Q9NQ55-2	90741.8	87631.8	96249.8
C9J3L7;C9J7N1;C9JYJ8;C9JZE3;E7EVL6;Q9BWE0	Filtered	Filtered	Filtered
C9J3Q3;C9J6N5;C9J6Y8;C9JP05;C9JQ40;C9JW51;C9JYP1;Q9H098;Q9H098-2	Filtered	Filtered	Filtered
C9J406	Filtered	Filtered	Filtered
C9J412;Q7Z736;Q7Z736-2;Q7Z736-3;Q7Z736-4	53463.8	Filtered	66086.8
C9J436;G3XAL7;Q96M27;Q96M27-2;Q96M27-3	127416	129053	135896
C9J4G0;F8W038;Q8IXM2	Filtered	Filtered	Filtered
C9J4K5;C9JSP0;F8W8A5;F8WD19;H7C006;H7C1C1;H7C1M7;H7C304;Q9NYP3;Q9NYP3-2;Q9NYP3-3	Filtered	Filtered	16422.3
C9J4P6;E7EUS0;Q6E0U4;Q6E0U4-2;Q6E0U4-3;Q6E0U4-4;Q6E0U4-5;Q6E0U4-6;Q6E0U4-7	12656.4	8152.68	8886.19
C9J502;D0UFD1;D0UFD3;D3YTI0;P55327;P55327-2;P55327-3;P55327-4	13352.8	15512.9	10330.7
C9J5C7;C9JU06;C9JZ00;F8WC44;Q86W33;Q86W33-2;Q86W33-3	Filtered	Filtered	Filtered
C9J5J4;H0Y322;H7C4T7;Q5TKA1;Q5TKA1-2;Q5TKA1-3	Filtered	Filtered	Filtered
C9J5N1;Q9BTE6;Q9BTE6-2;Q9BTE6-3	Filtered	37855	24706.6
C9J5X1;P08069	155721	152163	168641
C9J6I6;C9JMV9;Q03154	Filtered	Filtered	Filtered
C9J6P4	304335	302537	258620
C9J6W2;Q96Q89;Q96Q89-2;Q96Q89-3	55414916	53119428	57611940
C9J712;P35080	92821.5	89654.3	86786.6
C9J7E5;Q9Y5L0;Q9Y5L0-1	29292.7	34125	26885.6
C9J7E8;Q9UL63;Q9UL63-2	21362.7	19513	18485.2
C9J7M1;O95749	Filtered	Filtered	Filtered
C9J8D0;C9JA69;F8W9C0;Q8WY36;Q8WY36-2	Filtered	Filtered	Filtered
C9J8E1;Q16644	Filtered	Filtered	Filtered
C9J8U1;F5H1H6;F8WAN1;H0Y3Q3;Q69YQ0	32490.9	20236.1	18177.8
C9J959	Filtered	Filtered	Filtered
C9J9I1;Q9C0D9	4489.67	5933.81	4546.95
C9J9K3;P08865	4314195	4125472	4.41869e+06
C9J9V6;O75414	107640	103672	108843
C9JA05;D6RD17;D6RHJ6;P01591	Filtered	Filtered	Filtered
C9JA08;Q96D46	103063	99263.7	107474
C9JA65;O00458	5798.45	10548.8	13702
C9JA77;P13646-2	48689.5	46934.2	55540
C9JAB2;G5E9M3;Q16629;Q16629-2;Q16629-3	449585	444530	486325
C9JAK5	95122.5	95225.8	121877
C9JAL9;Q9BZE9;Q9BZE9-2;Q9BZE9-3;Q9BZE9-4	Filtered	Filtered	Filtered
C9JAX1;Q16595	42100.8	37318.6	34276.5
C9JB30;Q9UPY8;Q9UPY8-2	Filtered	Filtered	Filtered
C9JBG5;Q8NBJ9;Q8NBJ9-2	721627	681253	471551
C9JBL1;Q9Y6A9	111935	157015	163659
C9JBY7;F5H3P2;Q9Y291	254806	252501	265462
C9JBZ4;Q9BT25;Q9BT25-2	30659.6	29921.1	40065.9
C9JC60;G5E977;Q6XQN6;Q6XQN6-2	Filtered	Filtered	Filtered
C9JC84;C9JEU5;P02679;P02679-2	57135.2	53011.9	41708.7
C9JCC6;E9PNC7;Q14919;Q14919-2	30395	48036.4	57231.6
C9JCW7;C9JE12;Q9BVT8	120299	122018	109774
C9JD84;E7EV71;Q14766;Q14766-2;Q14766-3;Q14766-4;Q14766-5	39024.4	45622.3	52190.4
C9JDG0;Q9NSV4	56340.8	60750.3	66842
C9JDM9;H0Y7R9;Q9NYQ6;Q9NYQ6-2	59677.2	62352.6	63646.5
C9JE15;H7C4I2;Q7Z695	Filtered	Filtered	Filtered
C9JEH3;C9JG97;Q13685	77615.3	67903.4	70381.8
C9JEJ2;P49585	70207.6	70289.3	70824.8
C9JF17;P05090	33763.3	25564.9	105227
C9JF58;H7C0S2;Q8WVF1;Q8WVF1-2;Q8WVF1-3	Filtered	Filtered	Filtered
C9JFM0;P23471;P23471-2	Filtered	Filtered	Filtered
C9JGP9;E7ESZ7;O95299	978601	1.01496e+06	1.08609e+06
C9JHX9;Q2TB10	Filtered	Filtered	Filtered
C9JI34;C9JSK7;E5RHG5;E7EW39;Q7Z2H8	67601.9	62172.3	64372.6
C9JIE4;O15061;O15061-2;O15061-3	Filtered	Filtered	Filtered
C9JIF9;P13798	162289	160330	165491
C9JIQ2;Q6IQ49;Q6IQ49-2	40543.1	32825.2	39647.7
C9JIZ8;O15119;O15119-2;O15119-3	Filtered	Filtered	Filtered
C9JJ19;P82930	1066974	1.04045e+06	1.07779e+06
C9JJ91;Q5T2R2;Q5T2R2-3	27579.2	34492.5	Filtered
C9JJN9;Q8N3P4;Q8N3P4-2;Q8N3P4-3	85260.2	89716.9	68790.8
C9JJV1;Q9Y5U2;Q9Y5U2-2	Filtered	47205.8	223638
C9JJX6;E9PDC3;O00192;O00192-2	Filtered	54850.2	57089.7
C9JK10;G5E9H1;P23229;P23229-2;P23229-3;P23229-4;P23229-5;P23229-6;P23229-9	51623.9	53709.2	61155
C9JKA9;H7BYN9;Q9NS87;Q9NS87-2;Q9NS87-4	Filtered	Filtered	201798
C9JKC4;Q969T7	Filtered	Filtered	Filtered
C9JKL2;C9JPX5;O95772	258730	271829	315297
C9JKU3;Q9P1Q0;Q9P1Q0-2;Q9P1Q0-4	16390.8	65905.5	40699.8
C9JKX0;F8VVB8;I1E4Y4;Q9Y4F3;Q9Y4F3-3;Q9Y4F3-4;Q9Y4F3-5	Filtered	Filtered	Filtered
C9JL12	67756.8	64034.8	61297.5
C9JL36;Q8WUT9;Q8WUT9-2	Filtered	Filtered	Filtered
C9JL75;Q12767;Q12767-2	Filtered	135511	Filtered
C9JLE3;P51654	370727	353553	337413
C9JLU1;P52434	68849.7	69596.8	77010.4
C9JLW8;I3L2L5;I3L4Q0	79928.9	76154.8	87308.3
C9JLX3;E7EM89;O60266	56836.8	76640.5	74485.3
C9JLZ0;O95104;O95104-2	43953.1	Filtered	Filtered
C9JMG9;E9PG60;H7C107;Q5JU85;Q5JU85-2;Q5JU85-3;Q6DN90;Q6DN90-2	31149.5	33739.5	35597.8
C9JMP5;C9JT95;F8WAF5;H7C0W4;Q96AH0;Q96AH0-2;Q96AH0-3;Q9BQ15	Filtered	Filtered	Filtered
C9JMZ0;D6R942;D6R9J8;D6RAH2;D6RB91;D6RC63;D6RCM6;D6RG14;D6RG21;D6RJA7;D6RJG6;F8W7V7;F8W966;H0YM62;Q02078;Q02078-2;Q02078-3;Q02078-4;Q02078-5;Q02078-6;Q05BX2;Q06413;Q06413-2;Q06413-3;Q06413-4;Q14814;Q14814-2;Q14814-3;Q14814-4;Q14814-5;Q14814-6;Q5T9U4	Filtered	Filtered	Filtered
C9JN85;Q13309	34344.2	60223.8	52121.4
C9JNE2;Q9Y530	46932.4	44595.6	43780.7
C9JNE5;P58340;P58340-2;P58340-3;P58340-4;Q2TLE3	884.231	1266.23	Filtered
C9JNZ0;C9JRY4;Q96IW7	106505	76514.9	82119.7
C9JP00;Q9NR56	Filtered	Filtered	Filtered
C9JP52;Q92609	65155.3	58822.8	63852.2
C9JP84;E9PB45;F8VUW5;Q15038	59250.5	26152.8	54591.1
C9JP85;Q16656;Q16656-2;Q96AN2	Filtered	Filtered	Filtered
C9JPG0;Q12765	Filtered	9964.73	9919.05
C9JPL0;Q9UK58;Q9UK58-4	Filtered	Filtered	Filtered
C9JPP2;H7BXP1;Q9NYR9;Q9NYR9-2;Q9NYR9-3	96505.9	47686.8	46996.4
C9JQ25;Q0VFZ6	71124.4	66755.6	68056.1
C9JQ41;H7C525;Q4VC31	488326	496979	514275
C9JQV6;E9PB63;E9PE62;E9PEE0;F5H096;F5H211;F5H4C0;F5H7N7;G3V3R7;G3V4U9;P54252;P54252-2	7449.28	Filtered	Filtered
C9JQW2;F8WE30;F8WF93;H7BZZ2;H7C0X4;Q92685	57477.2	52825.4	53984.9
C9JR56;Q3ZB87;Q9UPW6	Filtered	Filtered	Filtered
C9JR60;Q8IX18;Q8IX18-3	37562.8	35811	35285
C9JRD2;C9JXB9;P25686;P25686-2	Filtered	Filtered	Filtered
C9JRJ5;Q9UGP4	Filtered	Filtered	Filtered
C9JRS0;P42575;P42575-2	Filtered	Filtered	Filtered
C9JRZ6;Q9NX63	814531	824873	819122
C9JS35;Q92890;Q92890-1	485428	489429	502941
C9JS86	1.1307e+06	2.22661e+06	2.50414e+06
C9JSC3;H7C2K2;Q9NZQ3;Q9NZQ3-2;Q9NZQ3-3;Q9NZQ3-4;Q9NZQ3-5	21372.9	Filtered	15180.2
C9JSZ2;Q96NT5;Q96NT5-2	123775	119554	110000
C9JTE9;G5E9L4;H7C5E2;Q9UHQ4	20678.9	21777.5	20458.2
C9JU26;F5H4H2;P56134;P56134-2	13892.4	17686.6	21850.9
C9JU51;Q93063;Q93063-2	71753	70103	70581.8
C9JUF4;O43768;O43768-3;O43768-5;O43768-7	32063.1	29915.8	29807.9
C9JUT4;Q93052	Filtered	Filtered	Filtered
C9JUU1;F5H6I7;Q6DD88	8060.16	4926.85	2168.73
C9JV30;E7EQS0;P20839;P20839-3	218502	221859	212468
C9JV86;F8VV56;F8VWK8;F8VZE2;F8W022;P08962;Q8N6Z9	170905	160784	179049
C9JVM4;E5RHU8;E5RIL0;E5RJS9;E9PHP8;H0YBC1;O95214	Filtered	Filtered	Filtered
C9JVN5;E9PD49;F8WAA2;Q9Y6N7;Q9Y6N7-2;Q9Y6N7-3;Q9Y6N7-4;Q9Y6N7-5	125164	126921	133443
C9JW63;Q9BSB7;Q9Y2D2;Q9Y2D2-2	41505.9	35531.4	31996.3
C9JWD3;Q9BQE9	Filtered	Filtered	Filtered
C9JWJ8;F8W8H9;Q14938;Q14938-2;Q14938-3;Q14938-5	50307.6	45361.3	Filtered
C9JWM7;P59998	259999	242921	222454
C9JWR9;E9PER6;O15530;O15530-3	62051.5	62965.7	61087.2
C9JWV4;H7C0G7;Q9H9Q4;Q9H9Q4-2	30219.9	27374.9	20106.1
C9JX01;Q9UM00;Q9UM00-2	375937	395337	400305
C9JX46;O95905	31653.4	34003.3	40179.3
C9JXA2;P29320	79934.2	80023.3	83931.7
C9JY04;Q9BU79	211144	222314	229221
C9JYJ4;Q8IUH4	72888.1	72064	74055
C9JYM0;O75817	10096.2	12888.2	Filtered
C9JYQ9;H0Y8C2;Q6P5R6	64767.9	58464.6	52725.5
C9JYS5;Q96ET8-3;Q9NYZ1	70146.6	69273.3	60498.7
C9JYY6;E9PDA4;F5GYD3;F8W774;F8W775;Q92823;Q92823-2;Q92823-3;Q92823-4;Q92823-5	24377.5	23737.1	23289.6
C9JZI4;Q9NP80	29320.7	24195.5	24149.5
C9JZR4;E9PB03;Q9NP61	19386.9	18563.1	8930.85
C9K005;Q9H330;Q9H330-2;Q9H330-4	68630.2	71339.9	68632.3
C9K0X5;H3BQR0;H3BRI5;H3BSK1;H3BTA6;O95149	6382.65	Filtered	Filtered
D3DNV8;Q8IVL5	5396.21	9449.56	9683.84
D3DU85;Q15599;Q15599-2	76820	77691.7	78337.7
D3YTA9;F6U1T9;P63098	Filtered	Filtered	Filtered
D3YTB5;P51617;P51617-2;P51617-3	35181.2	27895.6	36128.6
D6R933;D6R980;D6R9F6;D6RGD0;D6RIZ3	Filtered	Filtered	Filtered
D6R938;E9PBG7;E9PF82;Q13557;Q13557-10;Q13557-11;Q13557-6;Q13557-8	271776	279831	287089
D6R9E3;D6RCT6;D6RIA0;Q9BWT6	13217.8	Filtered	Filtered
D6R9L8;D6RD98;D6RDG6;Q6ZTZ1	Filtered	Filtered	Filtered
D6R9M8;D6RAE5;Q5Q9G5;Q5Q9G7;Q5Q9G8;Q9UBT6;Q9UBT6-2;Q9UBT6-4	73838.1	86828.6	93506.9
D6R9Q4;D6RAY6;Q96MT8;Q96MT8-2;Q96MT8-3;Q96MT8-4	24300.8	19400.7	23360.4
D6R9Q7;E7ESU6;Q8NBW4;Q8NBW4-2	841811	853686	839826
D6R9S7;D6RDB0;D6RDM3;D6RHE3;E7ENY4;E7ES98;Q96GZ6;Q96GZ6-2;Q96GZ6-5;Q96GZ6-6;Q96GZ6-7;Q96GZ6-8	Filtered	Filtered	Filtered
D6R9S8;D6RA76;D6RAZ7;D6RC11;D6RCE6;D6RCR8;D6RD48;D6RDI6;D6RDP6;D6RDY1;D6RFX6;D6RHI6;D6RHU6;D6RIU2;H0Y8T9;Q9NY35;Q9NY35-2	68357.5	61664.6	61801.6
D6R9W2;H9KV97;Q8NEC7	Filtered	Filtered	Filtered
D6RA47;D6RE79;D6RIZ4;Q14728	Filtered	Filtered	Filtered
D6RAD4;P50613	Filtered	Filtered	Filtered
D6RAK8;D6RBJ7;D6RF35;P02774;P02774-2	50142.6	40741.6	Filtered
D6RAU4;Q9H8E8	Filtered	Filtered	Filtered
D6RB01;Q9Y6X4	Filtered	Filtered	Filtered
D6RB59;Q6P2E8	72034.4	72570	286041
D6RB81;F8W9N1;Q9UHK6	10559	Filtered	Filtered
D6RBB0;O60683	40779.5	43361.1	39807.8
D6RBB5;Q99735	204732	486572	468435
D6RBI1;D6RFY6;D6RJ86;H0Y8S5;Q96H20;Q96H20-2	79122.7	72473.5	67491.6
D6RBN9;Q8IUW5	49751.5	46670.9	48401.4
D6RBR7;Q9Y3S2	953.072	4594.55	5283.51
D6RBS5;Q8IZ81	163488	165788	165339
D6RBW1;P06730;P06730-2;P06730-3	138044	137810	143926
D6RC10	82048.7	75134.8	Filtered
D6RC82;D6RFZ2;Q0IIM8;Q0IIM8-2;Q0IIM8-3	Filtered	Filtered	Filtered
D6RCD0;Q8NBQ5	105489	95369.9	101365
D6RD20;D6RJC2;G3V1P6;P30307;P30307-2	Filtered	Filtered	Filtered
D6RD25;Q9Y255	Filtered	Filtered	Filtered
D6RDI3;H0Y8R4;H0Y919;Q9BVS4	Filtered	Filtered	Filtered
D6RDY7;Q9UJT9	1.58633e+06	1.58472e+06	53307.6
D6REA1;Q9H173	34015.8	45615.4	43514
D6REA6;F6TF62;F6VM53;H3BMF3;H3BNB2;H3BNT3;H3BQ55;H3BRT2;H3BS73;Q96S19;Q96S19-2;Q96S19-3	Filtered	Filtered	Filtered
D6REB5;P35475	165522	164954	170425
D6REN6;P12081	751625	804965	59581.4
D6REQ6	224231	256739	271694
D6RER5;D6RGI3;Q9NVA2;Q9NVA2-2	184590	179256	183283
D6REX7;D6RHD2;O43609	Filtered	9337.4	Filtered
D6RF48;Q9P2W9	177045	176907	183914
D6RFI3;D6RGI4;E7EQR8;Q9GZM5	99116.6	92387.2	80125.9
D6RFI4;Q99697;Q99697-2;Q99697-3	Filtered	3660.87	399270
D6RG18;D6RHI7;P51946	Filtered	Filtered	Filtered
D6RGG3;Q99715;Q99715-4	78320.5	79972.5	87406.1
D6RGK9;H0Y9C1;H0Y9Z5;Q96LI5;Q9ULM6	30732.5	33722.2	52861.7
D6RGV5;D6RIE3;P14406	3272616	3223648	3.39456e+06
D6RHE1	30383.9	27676.8	28244.3
D6RHG7;H7BXS5;Q86VE9;Q86VE9-2;Q86VE9-3;Q86VE9-4	72591.9	71925.1	76882.4
D6RHI9	8696784	8766970	8863128
D6RI04;Q53HV7	Filtered	Filtered	Filtered
D6RIA1;E9PH99;Q9Y4E5;Q9Y4E5-2	Filtered	Filtered	Filtered
D6RIW7	9062.33	8432.51	9537.85
D6RJ90;Q9Y6G5	107550	115084	123260
D6RJG9;Q9Y5W7;Q9Y5W7-2;Q9Y5W7-3;Q9Y5W7-4	62631.5	65519.6	72731.9
D7UEQ6;H7BXT2;Q9BSW2;Q9BSW2-2	Filtered	16750	15699.7
D7UEQ7;D9N155;F8W7N8;H0Y8B3;Q96HN2;Q96HN2-2;Q96HN2-3	28191.9	65327.5	43091.8
E0CX11	29244.1	24799.5	25362.8
E1B6X0;P43007	103497	99236.9	91601.1
E2QC23;O75600	36157	37188.7	38155.8
E2QRD4;Q6ZRQ5	Filtered	Filtered	Filtered
E2QRD5	56684.9	42310.2	23090.4
E2QRF9;O75496	Filtered	Filtered	Filtered
E2QRH7;F6SH78;Q5TGH5;Q9NYP7	137147	136125	138439
E3W978;F8WCW5;O75330;O75330-2;O75330-3;O75330-4	35050.7	31824.4	Filtered
E5KQS6;E9PK26;E9PMW6;Q9NRS6;Q9NRS6-2	Filtered	Filtered	Filtered
E5RFG5;E5RFT3;E5RGA0;E5RGW5;E5RIW0;E5RJH2;G3V105;O14920;O14920-3	Filtered	Filtered	Filtered
E5RFJ1;Q96MF7	62816.7	81917.6	83056.5
E5RFY4;E5RGP2;E5RIV2;G3V140;G5E992;Q5T6A0;Q8IYX8	Filtered	21127.9	21621.8
E5RG17;Q6P1N9	171807	85607.3	163990
E5RGN3;E5RIM7;O00244	47540.6	7545.97	9086.27
E5RGS2;E5RJV5;Q9H6H4	171827	179444	186770
E5RGT2;Q96MH6;Q96MH6-2	58058.8	55137.2	91346.4
E5RGZ2;H0YC02;H0YKJ1;Q6NT76;Q6NT76-2;Q6NT76-3;Q6NT76-5	Filtered	Filtered	Filtered
E5RH35;E5RJA8;E5RJP8;E5RJZ7;Q9Y646	70115.6	59040.4	61069.6
E5RHG8;Q15369	108755	107927	113451
E5RI87;Q86XS8	37578.1	33455.1	Filtered
E5RIA9;E5RJK1;H0YAN3;Q9UJ68;Q9UJ68-2;Q9UJ68-3;Q9UJ68-4;Q9UJ68-5	Filtered	32579	Filtered
E5RIE8;O43513	Filtered	Filtered	Filtered
E5RIH5;E5RIZ0;Q6NXR4	16644.9	Filtered	Filtered
E5RIQ5;Q9BX73;Q9BX73-2	79761.4	79396.2	90463.8
E5RIW6;F5H8H8;Q5SVS4	Filtered	385044	Filtered
E5RJ26;P49810;P49810-3	144036	142996	147508
E5RJ52;P53677	104411	101784	92145.7
E5RJ68;O00203	342933	344165	348474
E5RJ99;Q8TCF1	Filtered	Filtered	Filtered
E5RJD8;O75347	92624.5	110731	115850
E5RJF8;E5RK82;O15182	114092	108248	116470
E5RJN7;E7EPX0;E7ER74;E7EVJ4;E9PEI3;E9PF26;E9PF50;E9PH62;F8VPI7;G5EA18;Q9NUL3;Q9NUL3-2;Q9NUL3-3;Q9NUL3-4	39253.9	19378.5	19459
E5RJR5;P63208	368973	355141	429691
E5RJS5;Q15390	41654.5	38076.7	35909.9
E7EM48;P33991	62212.9	67600.6	60930
E7EM60;P51398;P51398-2	302002	306137	300627
E7EM64;Q7L5N1	52047.2	19311.3	Filtered
E7EM77;H0Y861;H0Y870;Q5SSC2;Q9H0R3	36730.7	31134.9	33793.1
E7EM99	Filtered	Filtered	6322.73
E7EMB1;Q9UH65	Filtered	Filtered	Filtered
E7EMB3;E7ETZ0;H0Y7A7;P62158	836291	841156	1.32353e+06
E7EMC3;E9PBC1;E9PBC2;F6PQP6;O95208;O95208-2	57947.4	49407.3	45368.8
E7EMF1;E7ESP4	84941.8	87723.5	86051.7
E7EMN6;P41236	Filtered	Filtered	295063
E7EMP9;H0Y2N2;Q9NRR4;Q9NRR4-2	4273.3	3059.17	4512.51
E7EMR3;E7EN28;E7ENK1;E7ES20;E7ESV6;E7ETE3;E7EUP0;E7EUW2;E7EVD6;E7EW95;E7EX52;E9PBG4;E9PCJ6;E9PE04;H0Y9K5;Q9HAR2;Q9HAR2-2	48880.1	50264.4	49646.6
E7EMS2;G3V3D1;G3V3E8;P61916	3611487	3.47737e+06	3.59419e+06
E7EMT1;E9PE96;Q9Y6V0;Q9Y6V0-2;Q9Y6V0-5;Q9Y6V0-6	394065	383195	387832
E7EMX7;E9PED3;Q9P0K7;Q9P0K7-2;Q9P0K7-3	99592	97908.7	3.44826e+06
E7EN32;O00255;O00255-2	Filtered	Filtered	Filtered
E7EN46;Q8TB03;Q8TB03-3	Filtered	Filtered	Filtered
E7EN60;E7EPS3;Q9H2P9;Q9H2P9-2;Q9H2P9-3;Q9H2P9-4;Q9H2P9-5	Filtered	Filtered	Filtered
E7EN63;E9PBF2;Q9UBC3;Q9UBC3-2;Q9UBC3-3;Q9UBC3-6	Filtered	Filtered	Filtered
E7EN73;Q8IZA0;Q8IZA0-2	92794.1	84250.9	85204
E7EN96;E9PGW7;Q15528;Q15528-2;Q5T8T7;Q5T8T8	91124.1	109460	108097
E7END2;E9PHV5;P28290;P28290-2;P28290-3	78319	63692.7	47140.2
E7END7	302994	304930	295143
E7ENF1;F5H7W8;Q96C57	Filtered	Filtered	Filtered
E7ENH9;P53396	270427	272512	277546
E7ENI0;F5H7K2;Q8IWI9	66289.2	Filtered	29596.6
E7ENN3;E7EQI5;E9PEL9;Q8NF91;Q8NF91-2;Q8NF91-4;Q8NF91-8	1.85745e+06	1.80421e+06	1720095
E7ENR5;H0Y714;Q96G21	58161.2	27081.1	47155.1
E7ENU4;P55265;P55265-4	47988.6	40384.2	53141.7
E7EP00;P53992	60505.7	61975.7	63225.1
E7EP23;E9PCX0;Q6IA86;Q6IA86-3	Filtered	21824.2	30968.7
E7EP65;E7EW77;Q9NYB9;Q9NYB9-2;Q9NYB9-4	142451	151606	158320
E7EP74	211915	205857	186315
E7EP77;E7EQX0;E7ESC9;H0YAG1;Q8IZU2	19823.1	19688.6	21275.7
E7EP97;H3BR29;H3BSM7;Q96GQ5	285824	279398	302182
E7EPA5;P10643	34530.2	40235.7	39718.2
E7EPA7;P29401	69760.1	65579.4	60618.2
E7EPC6;P16070;P16070-10;P16070-11;P16070-12;P16070-13;P16070-14;P16070-16;P16070-17;P16070-18;P16070-3;P16070-4;P16070-5;P16070-6;P16070-7;P16070-8	1.55923e+06	1.5047e+06	1500981
E7EPC9;E7EX17;P23588	52791.7	54113.6	67524.1
E7EPD1;P08572	368134	365924	364409
E7EPD8;G3V2F4;Q86TV8;Q9NUW8	Filtered	Filtered	Filtered
E7EPH0;F8W7B9;O60512	13495.2	39270	15621.1
E7EPI0;Q9P2D0	Filtered	Filtered	Filtered
E7EPK6;E7ETK0;P62847;P62847-2;P62847-3	915470	875091	934704
E7EPL3;Q7Z401	81379.8	106673	86765.7
E7EPL4;H3BNZ1;Q6P996	111048	8387.32	5894.11
E7EPN9;Q9Y520;Q9Y520-4;Q9Y520-5;Q9Y520-7	121049	128762	139290
E7EPP7;Q6ZWJ1	Filtered	Filtered	Filtered
E7EPT4;P19404	527634	533141	536857
E7EPV7;P37840;P37840-2	Filtered	Filtered	Filtered
E7EPX7;E7EVP7;G5E9P1;Q14643;Q14643-2;Q14643-3;Q14643-4;Q14643-5;Q14643-6;Q14643-7;Q14643-8	80852	83313.2	90822.2
E7EPZ3;O60784	305254	299859	301763
E7EPZ8;H3BNF5;H3BPV6;H3BSB6;H3BUA4;H3BUR2	89410	91772.9	89846
E7EQ34;O14653;O14653-2	57472.5	56753.4	56750
E7EQ45;Q9H0R1	177945	180948	200610
E7EQ64;P07477	91614.7	72889.2	498580
E7EQ67;F8W8D6;H7BY63;Q8NB25;Q8NB25-2;Q8NB25-3	Filtered	Filtered	Filtered
E7EQ69;Q9GZZ1	27142	17601.1	26815.5
E7EQ81;F6UBB5;Q7Z412	22538.1	24566.4	16169.8
E7EQC1;P22570	637155	646273	680114
E7EQD5;F5GXG3;Q15833;Q15833-2	70165	104519	73493.6
E7EQJ0	Filtered	Filtered	Filtered
E7EQN6;Q9GZR1;Q9GZR1-2	14444.9	13237.3	12852.4
E7EQT4	41921.2	40486.1	41669.4
E7EQU1;E7ES08;O15347	447251	397595	401132
E7EQW9;E9PCR8;Q96RT1;Q96RT1-2;Q96RT1-3;Q96RT1-4;Q96RT1-5;Q96RT1-6	153760	156874	166606
E7EQY4;E7EV10;F8W8M8;Q9BTC8;Q9BTC8-2	Filtered	44738.3	Filtered
E7EQZ4;Q16637;Q16637-3	135700	137305	132222
E7ER53;E7EVZ1;G3V138;Q86UP3;Q86UP3-2;Q86UP3-4	26097.9	Filtered	Filtered
E7ER66;O94986	68432.9	62543	70571.2
E7ER89;H0Y373;O95340;O95340-2	Filtered	73308.3	Filtered
E7ER97;F5GXH4;O95671;O95671-2	10635.1	5669.77	9286.8
E7ERH6;Q9UBN7	Filtered	Filtered	Filtered
E7ERJ4;E7EWI9;P51991-2	557011	541847	535075
E7ERK9;Q9UI10	65337.3	57860.6	54040.2
E7ERS3;Q86VM9	Filtered	Filtered	Filtered
E7ERU2;E9PEB9;F8W9J4;Q03001	38946	35281.5	38551.5
E7ERZ2;F8WDS5;F8WDV1;Q9Y535;Q9Y535-2	Filtered	Filtered	Filtered
E7ES19;P35443	150384	144565	149847
E7ES32	Filtered	Filtered	Filtered
E7ES43;O95757	64100.7	67012.5	67919.1
E7ES96;P49768;P49768-2	198218	207578	213248
E7ESA6;H0YBP1;Q05397;Q05397-5;Q8IYN9	22578.4	Filtered	Filtered
E7ESC0;H3BRP3;Q9UBI4;Q9UBI4-2	28369.4	24642.9	22816.9
E7ESC6;E9PEN8;Q9UIA9	29843.8	17366.7	35285.6
E7ESD5;E9PLN6;F2Z2Y1;O95677;O95677-2;O95677-4;O95677-5	Filtered	Filtered	Filtered
E7ESG3;Q96I15	Filtered	Filtered	Filtered
E7ESG6;F5H0B5;Q92504	17319.2	11519.7	13355.1
E7ESJ0;Q92743	50014.3	68943.7	61480.7
E7ESJ3;Q9UPS8;Q9UPS8-3	86447.6	81566.5	72744.9
E7ESK6;E9PBI9;F5H0S6;P34741	271220	267999	280014
E7ESL0;Q9NWU5	199534	228027	272852
E7ESM6;Q7KZF4	5160188	5.09845e+06	5198085
E7ESS3;Q71RG4;Q71RG4-2;Q71RG4-3	Filtered	Filtered	Filtered
E7EST0;F6YA60;H0YFM4;Q969R8	67208.4	61936.2	67331.7
E7ESU5;P02768	3849502	3777682	3837764
E7ESZ5;Q9BV35;Q9BV35-2;Q9BV35-3;Q9BV35-4	Filtered	Filtered	Filtered
E7ET15	Filtered	Filtered	Filtered
E7ET21;Q9NVC6	Filtered	Filtered	Filtered
E7ET38;F8VQP3;O95628-4;O95628-8	Filtered	Filtered	Filtered
E7ET49;Q8NCG7;Q8NCG7-2;Q8NCG7-4	180003	189758	183381
E7ET55;F5H748;P35670;P35670-2;P35670-4	129941	122720	124650
E7ETA6	114573	111525	109874
E7ETB3;Q9ULA0	Filtered	Filtered	Filtered
E7ETE0	24998.5	13850.8	27597.7
E7ETP2;Q96GG9	Filtered	Filtered	Filtered
E7ETP9;Q9UQV4	92120	107093	105336
E7ETR5;H3BSM0;Q53FZ2	Filtered	Filtered	Filtered
E7ETS7;Q12959;Q12959-3;Q12959-5;Q12959-6;Q12959-7	301422	294656	316064
E7ETU7;H0Y9G6;P09001	436106	437442	439285
E7ETX0;Q8NHX9	143521	144028	139198
E7ETY2;Q13428-7	204938	193586	196841
E7ETY3;Q8IWA5;Q8IWA5-2;Q8IWA5-3	Filtered	Filtered	Filtered
E7ETY4;E9PC69;Q7KZI7;Q7KZI7-10;Q7KZI7-11;Q7KZI7-12;Q7KZI7-13;Q7KZI7-14;Q7KZI7-15;Q7KZI7-16;Q7KZI7-2;Q7KZI7-3;Q7KZI7-4;Q7KZI7-5;Q7KZI7-6;Q7KZI7-7;Q7KZI7-8;Q7KZI7-9	81151.4	83546.9	82774
E7ETY7;Q8TED1	122620	125110	136858
E7ETZ3;Q9BVC6	1.09459e+06	1.07661e+06	1.12936e+06
E7ETZ4;Q9Y6E2	333283	311775	326427
E7EU09;P11362;P11362-14;P11362-19;P11362-2;P11362-20;P11362-21;P11362-3;P11362-4;P11362-5;P11362-6;P11362-7	68024.8	73024	75418.2
E7EU13;Q96P48;Q96P48-1;Q96P48-2;Q96P48-3;Q96P48-4;Q96P48-5;Q96P48-7	20990	19091.8	17156.2
E7EU23;P50395	370042	356413	364016
E7EU28;Q86U06;Q86U06-2;Q86U06-3;Q86U06-4;Q86U06-5	Filtered	Filtered	10760.8
E7EU54	300577	276573	305107
E7EU78;Q9Y6K9;Q9Y6K9-2	Filtered	Filtered	Filtered
E7EU81	Filtered	Filtered	Filtered
E7EU96;P68400;Q5U5J2	334072	329311	320877
E7EUC3;O43657	227521	222001	232192
E7EUC7;Q16851;Q16851-2	Filtered	Filtered	9668.36
E7EUE1;P28288	801794	706874	751180
E7EUG5;H7C5V1;Q9BTF0;Q9BTF0-2	Filtered	Filtered	3368.11
E7EUH9;H0Y6U5;Q86XI2;Q86XI2-2	Filtered	Filtered	21706.3
E7EUJ4;Q504U3	Filtered	Filtered	Filtered
E7EUL4;H7C3D5;Q8NC44	59361.8	61484.1	56481.8
E7EUN2;Q9UPQ3;Q9UPQ3-2	164883	155371	162574
E7EUN9;Q9NX74	40177.4	29433.9	28631.7
E7EUS2;Q8TBZ0;Q8TBZ0-2	5514.91	Filtered	Filtered
E7EUT4	9725486	9516430	9349412
E7EUU4	335889	329162	332519
E7EUY8;Q8TBZ3;Q8TBZ3-2	86679.5	82219.5	68764
E7EV41;F5GZV3;F5H5B3;F6VPY9;P32418;P32418-2;P32418-3;P32418-4	Filtered	Filtered	Filtered
E7EV80;E7EX01;Q14168;Q14168-2;Q14168-3	116958	108776	124953
E7EVA0	194479	260282	223959
E7EVC7;Q676U5;Q676U5-2;Q676U5-3	Filtered	Filtered	Filtered
E7EVF4;E7EVJ5;Q96F07-2	20781.5	19032.3	24406.9
E7EVF6;Q9Y4P8;Q9Y4P8-2;Q9Y4P8-3;Q9Y4P8-4;Q9Y4P8-5;Q9Y4P8-6	38977.1	36312.3	39944.2
E7EVG1;Q8TAD8	26050.7	Filtered	225020
E7EVH7	140167	135994	143093
E7EVH9;E9PAV8;F5H6B0;Q08623;Q08623-3	Filtered	Filtered	Filtered
E7EVR7;H7BXU9;P21802;P21802-10;P21802-11;P21802-12;P21802-13;P21802-15;P21802-16;P21802-17;P21802-18;P21802-2;P21802-20;P21802-21;P21802-22;P21802-23;P21802-3;P21802-4;P21802-5;P21802-6;P21802-7;P21802-8;P21802-9	53697.1	70768.1	75806.3
E7EW05;Q9NVU7	26736.1	28628.1	56692.1
E7EW18;P06746	38460	34993	35978.9
E7EW20;Q9UM54-6	114890	110321	118894
E7EW67;Q6PII3	Filtered	Filtered	Filtered
E7EW84;E9PHI3;F2Z2Q3;Q8TAG9	14871.9	5328.69	15227.8
E7EW90;Q70EL1;Q70EL1-10;Q70EL1-7;Q70EL1-8;Q70EL1-9	56833.1	24705	Filtered
E7EW96;O14656	165702	179058	174346
E7EWC2;Q13576	46967.7	51154.9	36388.7
E7EWE9;Q8NBT2	20851.1	18012.8	22763.5
E7EWM1;Q15596	Filtered	Filtered	Filtered
E7EWN2;H0Y5J3;O15550	Filtered	Filtered	Filtered
E7EWQ8;O75093;O75093-2;Q5T0V0;Q5T0V2;Q5T0V3;Q5T0V4	101671	Filtered	Filtered
E7EWR0;Q13616	116372	109392	115544
E7EWT3	52651.3	60183.9	54753.4
E7EWW0;F5H7K1;G5E9I3;Q7Z3J2	152756	151612	154676
E7EWX6;E7EXB6;Q8IXJ6;Q8IXJ6-2;Q8IXJ6-3;Q8IXJ6-4	Filtered	Filtered	Filtered
E7EWZ6;P06756;P06756-2	162153	166815	166013
E7EWZ9;P60983	56682.7	60642.2	60842.9
E7EX51;Q96ST2;Q96ST2-2;Q96ST2-3	16187.4	21486.5	19467.3
E7EX90;E9PFS5;E9PGE1	40095.7	36415.3	38935.7
E9PAL6;Q86XN8;Q86XN8-2	2.22133e+06	2.32433e+06	2.38335e+06
E9PAL9	372672	353729	348598
E9PAM1;F5H0M7;H0YGN7;Q2M296;Q2M296-2	Filtered	Filtered	Filtered
E9PAT7;Q15013	Filtered	Filtered	Filtered
E9PAU2	88200.8	96833.3	94770.9
E9PAV3;F8VU71;F8VZJ2;H0YHX9;Q13765	115210	129958	111333
E9PAX8;F8W0Q9;Q8NEY8-2;Q8NEY8-8	48315.9	36271.6	Filtered
E9PAZ2;Q96HR8	63057.8	61116.1	59787
E9PB02;P78346	223191	Filtered	Filtered
E9PB12;Q96RT8	17889.3	18215.3	9256.62
E9PB30;Q4KMQ2;Q4KMQ2-2	129507	128481	126766
E9PB61	265776	271475	317825
E9PBB0;Q6Y7W6	295445	300830	304817
E9PBB3;P40855;P40855-5;Q5QNY5	39570.4	41704.1	39855
E9PBD4;H0Y368;O60762;Q5QPK2	379775	375027	392715
E9PBJ6;Q12772	22654	14134.2	21408.4
E9PBL7;Q14393;Q14393-2;Q14393-3;Q14393-4	49316.5	41372.5	38617.4
E9PBL8;Q8WTW3	13329.4	12971.4	15457
E9PBP2;P09668	394812	403140	418101
E9PBQ3;Q8N511	139800	138790	142379
E9PBQ9	67749.8	Filtered	Filtered
E9PBR4;Q96NL0;Q96NL0-2;Q96NL0-3;Q96NL0-4	23676.4	19486.4	Filtered
E9PBR6;Q5SNT2;Q5SNT2-2	89891.5	88745.6	87332.1
E9PBR7;H2N333;H3BT57;P29590;P29590-10;P29590-11;P29590-12;P29590-13;P29590-14;P29590-2;P29590-3;P29590-4;P29590-5;P29590-8;P29590-9	Filtered	Filtered	Filtered
E9PBS3;H0Y442;Q6ZS17;Q6ZS17-2;Q6ZS17-3	Filtered	Filtered	Filtered
E9PBV3	10645.3	10960.5	11558.8
E9PBV5;Q96FV2	Filtered	Filtered	Filtered
E9PBY3	11323.2	11048.5	13721
E9PBZ4;Q6P4H8	Filtered	Filtered	Filtered
E9PC49;Q96EB6	Filtered	Filtered	Filtered
E9PC62;O95319;O95319-2;O95319-3;O95319-4;O95319-5;Q5VZZ6	Filtered	Filtered	Filtered
E9PC67	31.4768	37.3387	35.6528
E9PC74;Q13144	173413	182871	75133.5
E9PC87;O94876	11663.1	Filtered	Filtered
E9PC97;Q8IWS0	185771	181964	181936
E9PCA6;Q9P2E7	8663.62	9473.05	10309.3
E9PCH4	8224.19	10307.2	Filtered
E9PCI3;P08243	70025.2	53510.4	59775
E9PCI9;P14324	66513	68626	72878.8
E9PCK7;Q5JTH9;Q5JTH9-2	29209.8	33384.2	32509.2
E9PCL5;E9PCV2;F5GXA2;F5GXV6;F5H7Z0;F8WA69;P56945;P56945-2	Filtered	Filtered	Filtered
E9PCM7;F5H2R1;F5H4I8;F5H838;F5H8J0;G3V1R3;P37275;Q2KJ05;Q5VZ84	Filtered	Filtered	Filtered
E9PCR4;Q9UJX5	8391.99	Filtered	2529.02
E9PCW1;O95249	116591	112372	109137
E9PD27;Q8TCZ2;Q8TCZ2-2;Q8TCZ2-3;Q8TCZ2-5	128857	68301.9	130469
E9PD44;H0YH69;Q9HBU6	244064	259168	276825
E9PD50;E9PEH2;Q92540;Q92540-2;Q92540-4	28224.9	36879.2	30546.7
E9PD64	41403.9	17239.3	43540.1
E9PD83;F5GZ53;Q13009	Filtered	Filtered	9539.07
E9PDB5;Q8N2G8	72639.9	68189.5	79059.7
E9PDC5;F8W846;F8W9T5;G8JL96;Q13332;Q13332-2;Q13332-3;Q13332-4;Q13332-6	39783.1	40664.7	40653.3
E9PDF6;O43795;O43795-2	162279	159206	163840
E9PDH4;Q9Y2I7	8340.96	8148.92	Filtered
E9PDM9;F5H170;Q8WW22;Q8WW22-2	841313	918673	1.00591e+06
E9PDN5;F5GZT3;F5H6K1;H0YFQ3;P11532;P11532-4	63577.4	35812.5	65801.4
E9PDP9;Q8WV44	14584.9	56019.8	Filtered
E9PDR0;P05166	118860	121811	125217
E9PDV0;P32929	Filtered	Filtered	Filtered
E9PDW0;Q9ULJ7	58862.5	53877	55669.2
E9PDY5;Q96MM7;Q96MM7-2;Q96MM7-3	88508.3	92968.4	90421.1
E9PE68;Q9BZF1;Q9BZF1-2	444259	450649	452605
E9PE75;O43933;Q96S70	Filtered	14139.2	13929.8
E9PEC0;Q16186	53997.5	52354.8	52652.8
E9PEH8;F5H5C1;Q9Y4J8-2	109407	110899	103319
E9PEI0;Q69YH5	Filtered	29666.6	Filtered
E9PEJ6;P98196	79510.9	92160.5	89717.3
E9PEP6;O14786	138252	133697	147458
E9PER1;Q14689	90968.2	87858.3	64859.7
E9PES4;F5H1C2;Q9Y496	Filtered	Filtered	Filtered
E9PET8;O60282	869961	853635	893303
E9PEZ3;H9KV28;O60610	77690.8	72686.4	74521.9
E9PF17;P13611;P13611-2;P13611-3;P13611-4;P13611-5	344172	346537	351145
E9PF19;Q9Y4P3	431837	390723	418725
E9PF74;Q9HC21	177362	177832	176381
E9PFA8;H0Y5K5;H7BXI5;Q9Y282;Q9Y282-3	141885	155517	155262
E9PFA9;Q86Y07;Q86Y07-2;Q86Y07-3;Q86Y07-4;Q86Y07-5	96593.4	95926.7	100359
E9PFM7;Q8IXQ6;Q8IXQ6-2	32762.8	57985.3	56556.6
E9PFP2;O43719	25101.6	29678.8	13979.6
E9PFR0	55651.4	54823.6	54570.1
E9PFR3;Q14738;Q14738-2	68264	64603.6	59719.5
E9PFU1	1.35845e+06	1.39281e+06	1.41471e+06
E9PFY5;F8W9I4	87139.2	73021.3	86257.1
E9PFZ1;Q5JPI3;Q5JPI3-2	Filtered	Filtered	Filtered
E9PFZ5;Q13308	563603	577281	571949
E9PFZ9;Q6SZW1;Q6SZW1-2	32561.9	Filtered	Filtered
E9PG19;O94868;O94868-2	50371.8	45874	49831.3
E9PG22;Q8IW35;Q8IW35-2	39884.7	Filtered	Filtered
E9PG71;P54764	508783	Filtered	Filtered
E9PG73;Q13427	73941.2	232634	81535.3
E9PG89;Q12873;Q12873-2	Filtered	Filtered	Filtered
E9PGD0;F5GXJ4;H0Y860;H7C5A5;Q9P246	23054.1	18619.2	36570.8
E9PGG4	Filtered	Filtered	Filtered
E9PGI2;H0YKJ9;O60637;O60637-2;O60637-3	5.01979e+06	4433308	4.37661e+06
E9PGL0;F5GXA0;F5GXF1;Q8NBK3;Q8NBK3-2;Q8NBK3-3	35358.6	55612.8	35745.2
E9PGM9;P78332	Filtered	Filtered	98439.1
E9PGP2;P03951;P03951-2	2.21101e+06	2081398	2.18748e+06
E9PGQ0;Q96H78	Filtered	11824.5	Filtered
E9PGR1;Q9Y251	247598	256086	263053
E9PGT1;Q15631	21086.9	22241.8	71834.2
E9PGT3;E9PRI4;Q15418;Q15418-2	141808	Filtered	Filtered
E9PGT6;Q99627	39158.8	39152.5	46628.7
E9PGZ0;G5E9Q2;O75534;O75534-2	94169.2	104306	101725
E9PH08;H3BP77;O00142;O00142-2	Filtered	Filtered	Filtered
E9PH29;P30048	8830562	9184029	8704003
E9PH43;Q14376;Q5QPP4;Q5QPP9	Filtered	Filtered	Filtered
E9PHA2;Q15003	34822.6	33575.7	38372.5
E9PHH9;Q9BUI4	Filtered	13707	Filtered
E9PHI5;P51674	Filtered	2626.84	Filtered
E9PHK9;Q13428;Q13428-4	61101.6	62143.5	68856.1
E9PHQ3;F5GZL3;Q9HAU0;Q9HAU0-2;Q9HAU0-4;Q9HAU0-5	27197.8	65483.6	16857.9
E9PHR3;F5H1V8;G5E9I6;Q15555	40236.7	39022.5	39512.8
E9PHX2;H0YIY6	Filtered	Filtered	2387.18
E9PHX7;F5GYJ2;P52594;P52594-2;P52594-3	128917	127833	128871
E9PHY5	21580.1	22134.5	17558.4
E9PI08;E9PKA7;Q9Y256	19226	22536.9	21282.9
E9PI34;Q9UPV0;Q9UPV0-2	8565.22	6798.69	32122.5
E9PI87;Q9BUP3;Q9BUP3-3	37140.6	39703.5	13969.5
E9PI88;O60547	Filtered	Filtered	Filtered
E9PIC0;O14521	125594	122102	127142
E9PIE4	77777.8	79620	85995.6
E9PIK4;E9PIN5;E9PKN9;E9PKZ4;E9PMW4;E9PMY0;E9PN66;E9PNB3;E9PPM1;E9PQ46;E9PS55;O14683	28771.4	39853.2	53344.5
E9PIT3;P00734	349669	342422	340630
E9PJ24;F8WEF5;Q9P1Y6;Q9P1Y6-2;Q9P1Y6-3	Filtered	Filtered	Filtered
E9PJ42;E9PP29;Q5BJD5;Q5BJD5-2	19953.4	17423.7	15302.4
E9PJ64;F8WAP3;Q5VU43;Q5VU43-3;Q5VU43-4	Filtered	Filtered	Filtered
E9PJB8;E9PN30;Q6GYA4;Q9BQE4	46008.3	38814.8	43124
E9PJE5;E9PNH3;G3V151;Q17R31;Q17R31-2	Filtered	3433.99	3315.96
E9PK25;G3V1A4;P23528	1.50131e+06	1458854	1.47981e+06
E9PK59;E9PS17;Q96KG9;Q96KG9-2;Q96KG9-3;Q96KG9-4	62799.6	57039.6	62766.9
E9PK91;Q9NYF8-3	Filtered	6599.9	Filtered
E9PK95;F8VNP5;F8VZR5;P28702;Q5STQ1	Filtered	Filtered	Filtered
E9PKA8;E9PLE3;E9PQL5;E9PSC8;Q6ZUT1;Q6ZUT1-2;Q6ZUT1-3	Filtered	Filtered	7418.83
E9PKB9;Q92543	36644.3	31067.2	30917.8
E9PKD1	340871	354293	323209
E9PKE4;F5GXA8;Q9HAB3	115229	102806	99525
E9PKF6;G8JLI3;H7BXH2;Q5H9R7;Q5H9R7-2;Q5H9R7-4;Q5H9R7-5;Q5H9R7-6	42412.1	44269.7	47667.8
E9PKG1;G5E9B6;H7C2I1;Q99873;Q99873-2;Q99873-3	86556.7	84889.8	86830.1
E9PKP7;P17480-2	900486	891066	943366
E9PKS3;P17405	478735	479172	470038
E9PKT4;Q8N131;Q8N131-2	1.20461e+06	1.16938e+06	1.2566e+06
E9PKU7	11254.3	Filtered	Filtered
E9PL01;Q15005	542554	529444	540366
E9PL17;Q92989	Filtered	Filtered	35008
E9PL22;F5H4Z5;Q9Y4L1	1389738	1.27911e+06	1.36731e+06
E9PL47;F8W860;Q9UBF8;Q9UBF8-2;Q9UBF8-3	Filtered	13345.5	11557
E9PL71	23792.7	31939.4	43184.4
E9PL82;E9PMR4;P48509	759180	750972	896149
E9PLD3;E9PRG8	Filtered	58044.9	99627
E9PLE4;E9PS47;Q9BVG9	130409	129468	167543
E9PLI6;E9PQD0;E9PRR8;E9PS30;E9PS76;Q8N9N8	Filtered	Filtered	Filtered
E9PLJ2;Q5VUV5;Q9BZP6;Q9BZP6-2;Q9BZP6-3	49304.2	Filtered	52212
E9PLK3;P55786	116280	105185	105801
E9PLM6;E9PPJ5;P21741	45630.6	43692.7	42289.4
E9PLN8;F8W9H0;I3L3B4;Q9BQB6;Q9BQB6-2;Q9BQB6-3	351701	638143	356888
E9PLY5	Filtered	Filtered	51099.6
E9PM19;F5H7K8;P29597	31074.2	34465.3	25398.4
E9PM46;Q96K76	Filtered	Filtered	Filtered
E9PM92;O00193	14112.2	18482.4	18767.2
E9PM96;P18074;P18074-2	32922.7	35367.9	24360.1
E9PMA3;Q8IZM9;Q8IZM9-2	70544.8	64295.6	68329.8
E9PMI6;P54105	58573.9	51979.6	51638.8
E9PML2;Q96CM3	26936.1	33045.3	26795.9
E9PML7;E9PPM8;Q9Y315	Filtered	Filtered	Filtered
E9PMM3;Q9Y5Y5;Q9Y5Y5-2	25556.6	25050.2	27646.4
E9PMQ6;Q00613;Q00613-2	Filtered	Filtered	Filtered
E9PMR6;Q9NZN5;Q9NZN5-2	Filtered	Filtered	4905.28
E9PMU7	13487.7	14080.9	15985.4
E9PN10;E9PND3;O00559;Q5Y8C7	Filtered	Filtered	Filtered
E9PN11;P08134;Q5JR08	127961	135296	133680
E9PN47;G5EA34;Q8NDH3;Q8NDH3-2	100280	103807	108778
E9PN65;Q13444;Q13444-2;Q13444-3;Q13444-4;Q13444-5;Q13444-6;Q13444-7;Q13444-8	29821.6	30931.8	31349.8
E9PNK6	Filtered	15117.9	Filtered
E9PNP3;E9PR47;Q9H7C9	Filtered	Filtered	Filtered
E9PNW4;E9PR17;P13987	458950	428586	446783
E9PNW5	2.12719e+06	2.05185e+06	2.10444e+06
E9PP15;Q14114;Q14114-2;Q14114-3;Q14114-4	30450.6	33335.1	19093.7
E9PP21;P21291	Filtered	Filtered	Filtered
E9PP28	44256.7	43799.7	38763
E9PPG8;Q53FT3	Filtered	Filtered	Filtered
E9PPN1;F2Z3M0;H0YCV5;Q8WW01;Q8WW01-2	Filtered	Filtered	Filtered
E9PPU0	Filtered	7402.96	Filtered
E9PPX7;F8W8H2;H0Y6L7;H3BQV1;Q0D2I5;Q0D2I5-4;Q0D2I5-5;Q0D2I5-7;Q5TF58	21958	19646.3	18337.3
E9PPZ9;O43292	204138	196653	201426
E9PQC4;Q9BZD4	Filtered	18703.6	11943.7
E9PQG7;Q03164;Q03164-2	7162.83	9506.32	Filtered
E9PQR4;P50607;P50607-2	100827	97488	99250.7
E9PQZ2;Q11206;Q11206-2;Q11206-3;Q11206-4;Q11206-5;Q8N6A6	12658.6	11628.7	13497.4
E9PR30;P62861	973844	1.01808e+06	992449
E9PR71;Q9P2Y5	83661.1	83897.5	80922.8
E9PRT4;Q4G0F5	214524	199070	211143
E9PRV2;F5H202;P46937;P46937-2;P46937-3	16660.5	Filtered	13439.3
E9PRW7	Filtered	Filtered	Filtered
E9PRY8;P29692-2	1.34014e+06	1.30609e+06	1.28001e+06
E9PSA5;Q96Q83	Filtered	Filtered	Filtered
E9PSI1	72397.7	69157.5	65153.6
F2Z2D5;Q8WVV4;Q8WVV4-1;Q8WVV4-3	Filtered	Filtered	Filtered
F2Z2E1;F5GY05;F5GZX9;Q96EK7;Q96EK7-2	Filtered	Filtered	Filtered
F2Z2E2;Q86VI3	62649.5	45958	50114.5
F2Z2T6;Q9HAH7;Q9HAH7-1	Filtered	Filtered	Filtered
F2Z2T8;F8VQY2;Q96RL1;Q96RL1-2;Q96RL1-3	Filtered	Filtered	Filtered
F2Z2U4;Q9Y4A5;Q9Y4A5-2	17775.5	22704.3	21317.3
F2Z2W7;Q8IZ69	33688	36097.5	48017.5
F2Z2X0;O00746;Q4TT34	91241.3	89308.6	92821.4
F2Z2X4;Q9C0E2	Filtered	Filtered	Filtered
F2Z317;Q9BYW2	Filtered	95473.6	Filtered
F2Z329;Q96Q45;Q96Q45-2;Q96Q45-3;Q96Q45-5	4385.9	Filtered	Filtered
F2Z384;Q96GJ1;Q96GJ1-2;Q96GJ1-3	279444	160662	23215.6
F5GWD1;Q9Y385	39723.2	40008.6	42467.1
F5GWD3;F5GWI8;F5GX35;F5GXG6;F5H4K7;F5H6X0;Q13889	Filtered	Filtered	Filtered
F5GWD7;Q8WVC0	132913	126111	132117
F5GWE0;Q15170;Q15170-2	Filtered	Filtered	Filtered
F5GWE5;Q00169	Filtered	165848	Filtered
F5GWF1;Q8TDJ6;Q8TDJ6-2	69548.1	72141.2	68853.9
F5GWG9	Filtered	Filtered	Filtered
F5GWH5;P61165	757321	532794	536468
F5GWI9;F5GXZ7;F5GZ97;Q9Y3C0	423138	418524	423560
F5GWJ1;O60245;O60245-2	20312.1	18842.6	16011.8
F5GWM1;Q14642;Q5T1B5	11532.5	12319.6	11525.4
F5GWM7	7313.37	Filtered	Filtered
F5GWP1;Q92575	355620	362149	381089
F5GWP3;H0YJ75;Q13362;Q13362-2;Q13362-3;Q13362-4	99386.5	96770.2	119498
F5GWR2	179421	176131	214024
F5GWR5;Q13642-1;Q13642-4;Q13642-5	35046.6	38443.8	34521.7
F5GWS3;Q6P9B6	55350.1	56548.6	60171.4
F5GWT4;F5H2M7;Q9H4A3;Q9H4A3-2;Q9H4A3-5;Q9H4A3-6	27167.1	24885.1	25796
F5GWU3;Q86YB7;Q86YB7-2	Filtered	Filtered	Filtered
F5GWU7;Q99717	102783	108012	105027
F5GWW1;Q8N283	72139.8	67362.4	76934.8
F5GWX3;P25445;P25445-6	99871.5	44882	81526
F5GWX5;F5H2G1;Q14839;Q14839-2	82635.9	81621.3	85395.5
F5GWY5;F5H3W1;O00592;O00592-2	132132	121587	122921
F5GX09;Q5HYJ3	121809	143875	152543
F5GX28;O94953	Filtered	Filtered	Filtered
F5GX30;P78364	Filtered	Filtered	Filtered
F5GX42	26949.8	25743.9	28715.8
F5GX65;Q8N2F6-5	21271.5	21374.2	22034.2
F5GX74;G3V1U0;Q6VMQ6	Filtered	Filtered	Filtered
F5GX82;O94915	42753.8	70144.8	67660.3
F5GXC8;Q9P2R7;Q9P2R7-2	468855	446094	445999
F5GXD5;G3V180;G3V1D3;Q9NY33	26888.1	36971.9	31571.5
F5GXE2;Q9NZ09;Q9NZ09-2	Filtered	Filtered	Filtered
F5GXE9;Q9Y3X0	Filtered	Filtered	Filtered
F5GXG0;Q96T88	73784.2	71386.5	72338.3
F5GXI9;F5GZ86;F5H5X3;H0YJH6;P42226;P42226-2	Filtered	Filtered	Filtered
F5GXJ0;F8W0W3;I3L0B9;Q5ST30	83070.4	82550.1	86728.7
F5GXK1;P20585	45680.5	44568.3	40932.4
F5GXK8;P0DJ07	Filtered	Filtered	25685.9
F5GXL7;I3L4X2;P33527;P33527-9	102106	101923	104514
F5GXL8;P09110	449951	433555	432499
F5GXM6;Q5THR1;Q9H5Z1	Filtered	Filtered	Filtered
F5GXP4;F5GY14;H3BPJ2;Q15041	495803	485170	248156
F5GXU2;O60678	19514.7	23287.6	24233.4
F5GXW6;O95415	97910	87606.1	84365.2
F5GXX5;P61803	111507	98052.1	103051
F5GY30;P04156;P04156-2	175885	164907	189848
F5GY80;F5H7G1;P07358	31790.2	30855.8	34560.1
F5GYA4;O14519	19498	19661.5	20819.6
F5GYD8;P04062;P04062-2	6083051	6.08866e+06	6.05818e+06
F5GYE6;P04035	64666.2	63658.6	66447
F5GYH6;Q9Y217;Q9Y217-2	Filtered	Filtered	Filtered
F5GYJ5;Q9NX18	58909.4	62386.4	60277
F5GYN4;Q96FW1	52980	75824.4	56037.3
F5GYQ1;P61421	2.04162e+06	1842653	1.93918e+06
F5GYQ4;P00367	1.90714e+06	1.98758e+06	2.17518e+06
F5GYQ5;Q5TBB1	277348	272533	21431.7
F5GYQ8	83598.1	284955	82778
F5GYX5;F5H445;O14513;O14513-2;O14513-3	2.56872e+06	2.48913e+06	2.39623e+06
F5GYX8;F5H4W7;Q9NW81	57808.9	62252.2	69390.8
F5GZ02;Q96CP6;Q96CP6-2;Q96CP6-3	85786.5	82296.1	80729.1
F5GZ16;Q13200	90696	89940.8	84397.9
F5GZ28;P18858	Filtered	Filtered	Filtered
F5GZ51;Q8N5G0;Q8N5G0-2	216125	132200	111361
F5GZ78;F5H854;P49023;P49023-2;P49023-3;P49023-4	Filtered	39764.5	47594.7
F5GZ90;Q9NZJ0	8672.69	8340.51	7098.4
F5GZA2;F8WDA7;P39060;P39060-1;P39060-2	755207	773928	822007
F5GZB3;F8W891;H0YEW1;Q38SD2	185790	182653	182436
F5GZK1;Q9UBQ6	55658.9	58073.4	61009.2
F5GZL5;Q5VT94;Q9H3K2	69838.1	66726.5	61627.7
F5GZN0;Q7Z7A1;Q7Z7A1-2;Q7Z7A1-5	Filtered	11643.3	Filtered
F5GZS0;Q9H2U1;Q9H2U1-2	67835.8	67886.5	75731.9
F5GZS6;P08195;P08195-3;P08195-4	863117	891043	922044
F5GZX4;Q9H9Y6	55435.6	56604.6	55311.8
F5GZZ6;F5H5T2;F8VWA9;F8VXJ0;Q5BKT4;Q5I7T1	64500.3	77373.8	70367.2
F5H025;F5H1H0;G3XAF4;P32004;P32004-2	60967.9	56903.1	58099
F5H039;F8W7D6;Q9NQX3;Q9NQX3-2	44942.5	46248	50212.6
F5H055;Q5T0B9	Filtered	Filtered	Filtered
F5H066;F5H0S9;Q9UP95;Q9UP95-2	49531.1	49775.2	48213.6
F5H070;F5H4E6;Q9Y4C1	Filtered	Filtered	Filtered
F5H098;P40925	249721	258863	266833
F5H0C3;F5H219;F8W762;F8WCP6;Q7Z4S6;Q7Z4S6-2;Q7Z4S6-3;Q7Z4S6-4	16065.6	15483	15761.9
F5H0C4;Q9BRP4;Q9BRP4-2	26174.3	23820.9	27901.9
F5H0F5;Q8WU90	190886	182155	192196
F5H0F9;Q9UJX4	38848.2	14458.6	35738.5
F5H0G2;Q14849;Q14849-2	432133	423171	446860
F5H0H0	Filtered	Filtered	110052
F5H0H3;F5H1L1;Q15424	84862.1	82921.7	86155.4
F5H0J4;H0YGA7;H3BM05;Q9BY67	193433	193474	214697
F5H0J6	87490.4	81096.8	92032.8
F5H0K1;F8W9R9;O75448;O75448-2	9859.33	9176.53	8522.69
F5H0K8;F8WEA9	Filtered	Filtered	Filtered
F5H0L8;Q9Y6Y8	57549.4	57547.7	58176.2
F5H0N5;Q8ND04;Q8ND04-2	22285.6	48885.7	48200.6
F5H0Q5;P02765	433028	432633	441381
F5H0Q6;F8WAG9;Q8N2M8;Q8N2M8-3	Filtered	Filtered	Filtered
F5H0R0	Filtered	Filtered	Filtered
F5H0W0;H3BV55;O15305	91575.5	93066.6	76299
F5H0W2;Q8N428;Q8N428-2	Filtered	Filtered	Filtered
F5H0X5	82076.9	14564.1	244320
F5H0Z5;I3L172;Q9BUT9;Q9BUT9-2	Filtered	Filtered	13116.2
F5H1A8;F8WA45;P06396;P06396-2;P06396-3	378380	386489	381967
F5H1F7;P29375;P29375-2	Filtered	Filtered	Filtered
F5H1G4;F5H2X3;O60462;O60462-2;O60462-3;O60462-4;O60462-5	60348.5	64287.5	64170.8
F5H1L4;F5H2M2;F5H2V0	297369	307737	330411
F5H1L8;H7C0T2;Q6GPH6;Q6GPH6-2	38339.7	39453.2	34715
F5H1N7;F5H2I6;Q6ZU35	4712.12	5221.57	5066.53
F5H1R5;P31323	44305.6	85144.1	34983.9
F5H1U5;P42357	Filtered	Filtered	Filtered
F5H1W0	66688.7	63057.8	65947.5
F5H1X8	21418.4	20254.3	22941.9
F5H1Y4;Q9HD26;Q9HD26-2	26572.7	34356.3	46910.9
F5H213;O00308	8088.43	6445.44	6167.89
F5H293;H7BXQ6;Q6UXD5-3	118716	102078	103553
F5H2A9;G3V1M7;P49748	172376	178165	181978
F5H2J3;Q96GC9	112855	191801	112823
F5H2M5;Q13129	Filtered	Filtered	Filtered
F5H2Q4;P43378	29232.8	29574.5	Filtered
F5H2Q7;F5H2Y7;Q9C0E8;Q9C0E8-2	483616	482997	503479
F5H2S2;Q8TF71	25201.2	25407.7	25929.1
F5H2S7;Q13561;Q13561-2;Q13561-3	85218.7	86220.2	88446.7
F5H2T1;Q5VUJ6	27973.8	27791.9	27917.7
F5H2U2;Q13523	23788.1	26136.7	22500.2
F5H2Y9;F5H3R1;H0YMG7;O94788;O94788-2	91449.1	83091.8	91406.2
F5H315;Q9HCS7	132814	64014.6	58609.5
F5H364;F5H7Q6	40246.8	44281.3	40413.2
F5H365;Q15436	91775	101191	108189
F5H398;P78563;P78563-3	Filtered	Filtered	Filtered
F5H3A1;P05023	5775139	5.63098e+06	5730704
F5H3E4;O95551;O95551-2;O95551-3	Filtered	Filtered	Filtered
F5H3H6;Q9BQ39	430765	445301	418716
F5H3J3;O43529	4378.69	Filtered	47072.2
F5H3N4;Q16850	528332	517749	547395
F5H3P9;Q969M3;Q969M3-3	88590.8	84037.9	94040.1
F5H3X5;Q99996;Q99996-2;Q99996-3;Q99996-5;Q99996-6	29322.7	26834	27298.9
F5H3Y1;H0Y7P1;Q93074;Q93074-2;Q93074-3	33485.2	27527.1	28247.4
F5H442;Q99816	428527	409257	406002
F5H476;Q5VTE6	14945267	14824798	26553490
F5H4C2;Q9H6Z4;Q9H6Z4-2;Q9H6Z4-3	Filtered	Filtered	Filtered
F5H4D0;Q2KHT3	Filtered	Filtered	Filtered
F5H4D7;G3V1L0;P78539;P78539-2;P78539-3	74997.2	77318.1	80471.5
F5H4E4;I3L2G3;Q9HA64	Filtered	Filtered	Filtered
F5H4F7;Q96JJ7	370642	350074	378589
F5H4G5;Q9UBV7	Filtered	Filtered	Filtered
F5H4I0;P09622	1.54791e+06	1.5088e+06	1550629
F5H4K0;Q5T9L3-2	75603.5	74900.6	79121.5
F5H4L0;Q9BSJ2	200000	187793	199483
F5H4M2;P54198	Filtered	Filtered	Filtered
F5H4P2;Q6GQQ9	5824.81	6206.72	7928.97
F5H4R0;Q59FE7	Filtered	70736.4	Filtered
F5H4U5;P04899-4	407359	390737	383878
F5H4U9;F8WA05;H0YKH1;H0YLF5;P40424;P40424-2	Filtered	Filtered	Filtered
F5H4V4;P46013	12355.6	11821.4	40742.9
F5H4W8;Q969U7	Filtered	Filtered	Filtered
F5H4Z4;H0Y6I6;Q96ME1;Q96ME1-2;Q96ME1-4	Filtered	Filtered	Filtered
F5H538;Q9Y6R4;Q9Y6R4-2	Filtered	Filtered	Filtered
F5H569;Q93050;Q93050-1	1.82105e+06	1.78197e+06	1.89925e+06
F5H5D3	263477	271656	267669
F5H5E4;P54687;P54687-4	20488.3	17560	18262.5
F5H5H1;Q8NCL4	Filtered	Filtered	Filtered
F5H5I8;G3XAH6;P51003	26371	19688.5	32003.9
F5H5K9;Q8IY17;Q8IY17-2;Q8IY17-3	98187.9	95530.3	48185.7
F5H5M2;Q06828	39804.5	56019	54841.3
F5H5M6;Q14520	173790	88655.4	158680
F5H5M7;P15260	156990	156560	157763
F5H5M9;F5H865;Q9UKE5;Q9UKE5-2;Q9UKE5-3;Q9UKE5-4;Q9UKE5-5;Q9UKE5-6;Q9UKE5-7;Q9UKE5-8	13912.7	14222	11041
F5H5N0;Q5VT25;Q5VT25-2;Q5VT25-4;Q5VT25-5;Q5VT25-6	66991.1	65942.5	64723.1
F5H5N4;F8VVB6;F8W1A2;Q99435;Q99435-2;Q99435-3;Q99435-4	Filtered	Filtered	Filtered
F5H5P2;P12694	245022	235366	274543
F5H5R8;P18440	Filtered	Filtered	Filtered
F5H5S2;F5H5X2;Q6NS38	Filtered	Filtered	Filtered
F5H5T5;Q7Z3V4;Q7Z3V4-2	7946.73	Filtered	4792.09
F5H5V5;Q01167;Q01167-2	Filtered	Filtered	Filtered
F5H604	115915	118662	120699
F5H620;Q96HP4	193561	136460	166629
F5H647;Q15572;Q15572-4;Q15572-5;Q15572-6	24905.9	Filtered	22549.9
F5H656;Q8WXF1	514473	511259	531155
F5H668	80905.6	73322	78590.2
F5H669;Q8N684;Q8N684-2;Q8N684-3	74994.6	78573.6	60273
F5H685;H7BYY3;Q5JWT2;Q9ULK4;Q9ULK4-2;Q9ULK4-3;Q9ULK4-4;Q9ULK4-5	16850.8	Filtered	14149
F5H6B8;Q12872	248492	Filtered	Filtered
F5H6D1;H0YH47;H7C0U7	86542.7	83349.4	95792.1
F5H6K0;O43143	275205	261617	256333
F5H6L9;Q9NR20;Q9NR20-2	276013	265259	260186
F5H6R1;Q9Y388	Filtered	Filtered	Filtered
F5H6T3;O95873	47712.8	41944.4	44394.9
F5H6Z0;Q00537;Q00537-2	Filtered	13098	Filtered
F5H711;Q8N5M9	42912	39043.2	36659.8
F5H715;Q96BJ3	27597.5	29813.6	30060.7
F5H721;Q9Y2W2	15883.8	29109.3	26897.2
F5H7D3;O43567	393061	375357	384760
F5H7D6	Filtered	Filtered	Filtered
F5H7E9;O14802	43197	9338.74	52202.6
F5H7J9;O75581	79376.8	80160.4	80128
F5H7K4;Q6PIU2;Q6PIU2-2	67520.7	56092.2	59408.3
F5H7L1	Filtered	Filtered	Filtered
F5H7S4;O14757	121948	142577	34413.2
F5H7U7;O60507	10454.9	10526.6	11862.9
F5H816;P06737	82172.6	89682.6	42250.2
F5H843;O60669	34455.8	34021.9	34530.4
F5H872;Q13503	Filtered	Filtered	Filtered
F5H897;Q12931	2.48969e+06	2.5924e+06	2.82538e+06
F5H8F7;Q9UBL3;Q9UBL3-3	Filtered	Filtered	Filtered
F5H8I7;Q9Y5A9	129493	117874	105042
F5H8J3;O96005	243502	249181	260518
F5H8K4;O43242	57728.9	54568.8	58863.6
F5H8L2;Q6NTF9;Q9UDT1	34121.8	Filtered	39305.7
F5H8L9;Q5JRV4;Q92562	Filtered	Filtered	Filtered
F5HFY4;Q99733	225720	211895	153056
F5HGG6;P53634	7074324	6665375	6897519
F6Q3Q2;F6SR56;F6TEP1;F6UCG7;F6UHJ8;F6V754;F6X9C6;F6XM29;F6Y981;H0Y4N7;H0Y4Q1;H0Y4V1;H0Y504;H0Y5A5;H0Y640;H0Y652;H0Y6F8;P20036	39619	42107.1	34238.7
F6S0T5;O60341;O60341-2	15541.2	18407.1	13508.9
F6TQG2;P28370;P28370-2	Filtered	Filtered	Filtered
F6VZ39;Q9H0Z9	Filtered	Filtered	Filtered
F6XS94;F8W7C5;Q08E86;Q14667;Q14667-2	14750.7	15426.2	15153
F6XY72	Filtered	Filtered	Filtered
F8VNW9;F8VSK3;F8VWH6;H0YI03;P40425	Filtered	Filtered	Filtered
F8VPD4;P27708	242224	257134	252997
F8VPF7;F8WCH5;Q96D96;Q96D96-3	Filtered	Filtered	Filtered
F8VPG7;Q13492;Q13492-2	68870	67262.6	59663.7
F8VQ10;Q13838;Q13838-2	383715	384656	409427
F8VQD4;Q8TAD7	22611.4	23255.7	25175.5
F8VQD9;Q9BSB4	13507.5	13227.4	13381
F8VR31;P51530;P51530-2;P51530-3	45277.6	44988.5	41690.6
F8VRJ2	28987.4	Filtered	23721.5
F8VRQ1;F8VXY0;F8W6I7;P09651;P09651-2	946239	954020	963206
F8VS64;P19013	142020	145698	119906
F8VS78;F8VWE0;Q12999	21309.9	20968.6	20185.4
F8VSL3;P25208	Filtered	Filtered	Filtered
F8VSZ4;Q9UIW2	71979.6	73732.6	61689.6
F8VU39;Q9UIF9;Q9UIF9-2;Q9UIF9-3	Filtered	Filtered	Filtered
F8VUJ3;Q8N4A0	15444.4	33451.9	34266.4
F8VUJ7	2549638	2516181	2565016
F8VV52;Q9NZN8	80106.4	61848.9	75733.2
F8VV69;F8W8P3;G3V1N7;Q6N075;Q6N075-2	Filtered	Filtered	Filtered
F8VVA7;P61923	159183	151519	164912
F8VVN7;F8VWX5;F8W098;F8W120;H0YIA4;Q9BVX2;Q9BVX2-2	9726.07	7677.91	4169.34
F8VW96;Q16527	52772.8	54880.1	51231.9
F8VW99;Q9H0K6	Filtered	Filtered	Filtered
F8VWT9	Filtered	Filtered	Filtered
F8VWZ8;Q52LW3	Filtered	Filtered	Filtered
F8VX04;Q9H2H9	78827.7	18789.5	4084.22
F8VXB4;P05787	1.02472e+06	1.01851e+06	1.08976e+06
F8VXG7;Q99590;Q99590-2	Filtered	6537.15	17226.4
F8VXI9;Q14161;Q14161-3;Q14161-4	73795.2	77750.2	79789.2
F8VXZ4	77139.1	64070.1	73348.2
F8VY86;Q12888;Q12888-2	Filtered	Filtered	Filtered
F8VYA6;Q9NRL3	97930	47437	51354.3
F8VYE8;F8W0W8;P36873;P36873-2	150826	140181	166446
F8VZX2	1.43792e+06	1.44577e+06	1.45312e+06
F8W1H5;P51148	276704	289688	287318
F8W1S1;Q7RTS7	66853.8	66776.4	73176.3
F8W1T6;Q15434	Filtered	Filtered	32289.6
F8W682;P04920;P04920-2	133314	161655	159402
F8W6M3;Q9NYG2;Q9NYG2-2	32383.2	31792.6	34422.3
F8W6N3;Q92560	Filtered	Filtered	Filtered
F8W6N6;P10244	Filtered	Filtered	Filtered
F8W6V6;Q9H2D6;Q9H2D6-2;Q9H2D6-3;Q9H2D6-5	60866.2	26244.9	43927.5
F8W6X9;Q7Z5N4;Q7Z5N4-3	65143.4	83863.3	55447.9
F8W717;O00423;O00423-3	Filtered	Filtered	Filtered
F8W726	Filtered	Filtered	Filtered
F8W727;P62910	501457	539730	631740
F8W733;Q9NXR7;Q9NXR7-1;Q9NXR7-3;Q9NXR7-4	46048.9	93011.5	104817
F8W752;Q5R372;Q5R372-3;Q5R372-4	15766.2	17121.1	Filtered
F8W7K3	73591.5	76217.8	76746.9
F8W7M4;O14678	129816	137412	147026
F8W7P9;Q9H903;Q9H903-1	Filtered	89000.2	Filtered
F8W7Q4;Q96A26	517996	551573	575896
F8W7S1;Q8NAN2	43234.6	32070.9	48467.6
F8W7U2;Q02487;Q02487-2	86925.6	79169.8	73722
F8W7X5;H7BYT3;O75928;O75928-2;O75928-3	Filtered	Filtered	Filtered
F8W839;O60333;O60333-2;O60333-3;O60333-4	61270.9	57688.5	57102.5
F8W840;Q9BYJ9	145343	143284	144471
F8W842;Q6UUV7;Q6UUV7-3	Filtered	Filtered	Filtered
F8W892;H0Y3N5;Q5HYY5;Q96T21;Q96T21-2	20057.3	17183	18882.3
F8W8I6;H0YGW6;P31483	87335.4	91987.9	98304.9
F8W8K3;Q8N108;Q8N108-12;Q8N108-13;Q8N108-14;Q8N108-15;Q8N108-16;Q8N108-17;Q8N108-18	Filtered	Filtered	Filtered
F8W8Q7;H0Y6I0;Q13439;Q13439-3;Q13439-4	21378	27707	33537.5
F8W8W7;O43493-6	Filtered	Filtered	Filtered
F8W8Y9;G3V588;G3V5A3;H0YJE5;Q13572;Q13572-2	Filtered	Filtered	Filtered
F8W911;P38571;P38571-2	2.41572e+06	2.4461e+06	2.43355e+06
F8W913;H7BY83;Q5JSH3;Q5JSH3-2;Q5JSH3-3	Filtered	Filtered	Filtered
F8W914	73174.8	61461.8	59220
F8W930;Q9Y6M1;Q9Y6M1-1	404856	412693	412067
F8W955;Q5JVF3;Q5JVF3-2;Q5JVF3-3;Q5JVF3-4	63993.8	57465.2	47086.2
F8W973;Q5SRE5;Q5SRE5-2	116405	112659	112796
F8W9B5;H9KV59;O43663	148415	145419	148846
F8W9C2;Q05086;Q05086-2;Q05086-3	4140.31	4524.59	4261.89
F8W9C9;Q8WVQ1	77297.6	99420.6	80728.5
F8W9D9;P46734;P46734-2;P46734-3	24945.4	26024.2	17916.4
F8W9H9;P08651;P08651-5	Filtered	Filtered	Filtered
F8W9I1	Filtered	Filtered	Filtered
F8W9I9;Q13627;Q13627-2;Q13627-3;Q13627-4;Q13627-5	34927.6	16565.3	46974.9
F8W9L4;P22607-4	88590.8	87283.8	150410
F8W9R3;P51797;P51797-5	80647	82154.2	82124.4
F8W9X7;Q567U6	246470	246167	259290
F8W9Y2;Q96T76	25356.7	24285.5	26271.1
F8WA39;Q13613	119744	126670	129320
F8WA59;P52655;P52655-2	Filtered	Filtered	Filtered
F8WAB8	44492.3	Filtered	Filtered
F8WAC3;Q9NWZ5;Q9NWZ5-4	77977	Filtered	Filtered
F8WAD8;G5E951;Q9P0K1;Q9P0K1-2;Q9P0K1-3;Q9P0K1-4;Q9P0K1-5	41164	46442.4	37990.9
F8WAF2;Q9H9A5;Q9H9A5-2;Q9H9A5-3;Q9H9A5-4	69305.1	66189.5	57903.1
F8WAI1	Filtered	Filtered	Filtered
F8WAJ0;Q9H8H2	22147.8	Filtered	Filtered
F8WAK8;Q8N3U4;Q8N3U4-2	49105.4	56334.4	27903
F8WAN7;H7C4X9;Q9ULU4-12;Q9ULU4-13;Q9ULU4-14;Q9ULU4-9	41873.2	36975	45379.7
F8WB05	Filtered	407054	Filtered
F8WBK2;O43493;O43493-2;O43493-3;O43493-5	9768.01	12702.5	11865.9
F8WBK5;Q9NQ50	357554	323902	354252
F8WBS1;Q9H832	11050	10401.8	9953.48
F8WBZ9;O75386	40259.4	11018.7	31130.2
F8WC15;P11166	179427	174061	173685
F8WC38;O75818;O75818-2	Filtered	Filtered	Filtered
F8WC68;O77932	Filtered	Filtered	Filtered
F8WCA0;P63027	371732	361816	364407
F8WCA3;Q8IX15	Filtered	Filtered	Filtered
F8WCD0;Q8NC42	202950	203901	211183
F8WCG1;O14657	32180.9	190149	Filtered
F8WCL7;Q9C086	Filtered	Filtered	Filtered
F8WCS9;Q70Z53;Q70Z53-2;Q70Z53-3;Q70Z53-4;Q70Z53-5	Filtered	Filtered	Filtered
F8WD04;G5E9T1;Q8WXF7	Filtered	Filtered	Filtered
F8WD63;Q70Z35;Q70Z35-2;Q70Z35-3	Filtered	Filtered	Filtered
F8WDL0	185863	195829	203473
F8WDM9;Q9NZM5	Filtered	43204.4	Filtered
F8WDY3;I3L0G8;P28715	11623.8	Filtered	10417.1
F8WE88;Q9Y4I1;Q9Y4I1-2	50340.5	56322.7	52018
F8WEC0;Q9H3L0	24411.2	24462.1	Filtered
F8WEC9;P02462;P02462-2	146885	135785	138346
F8WEQ4;P52735;P52735-2;P52735-3	345108	256673	45442.4
F8WF14;P06276	94603.2	84076.6	85390.2
F8WF48;Q99442	478091	518255	589263
F8WJN3;Q16630;Q16630-2;Q16630-3	55011.8	55775.1	53494.9
G3V0G5;Q8IV38	Filtered	Filtered	Filtered
G3V0I5;P49821;P49821-2	819611	797914	806618
G3V0I6;Q01804;Q01804-3	72705.9	43727.7	70499.6
G3V117;Q9NPA8	77380.8	80408.1	79018.1
G3V130;Q96E29;Q96E29-2	35387.5	35056.3	42283.1
G3V167;Q9UGN5;Q9UGN5-2	181602	174846	207374
G3V1C4;P30260	19552.6	29931.5	28251.3
G3V1J3;O75027;O75027-2	53244.3	54481.1	54466
G3V1K2;Q9Y2B1	35112.8	Filtered	Filtered
G3V1K3	253534	262778	252296
G3V1N1;O15226	44829.1	48555.1	43591.7
G3V1N2	4910378	5.20806e+06	5.05094e+06
G3V1P3;Q969J3	703450	695091	748987
G3V1R9;G5E9U0;Q9NPH2;Q9NPH2-2	26235	25343	29353
G3V1S2;Q13617	88581.6	84028.2	81917.2
G3V1S4;G3V5S9;Q9Y324	Filtered	Filtered	85148.4
G3V1U1;Q8N118	46337.7	40562.8	40421.6
G3V1U8;P51948	Filtered	Filtered	Filtered
G3V1V0	672673	661439	670153
G3V1V1;Q8TBF4	Filtered	Filtered	Filtered
G3V1X9;P45973	76198.9	79547.5	73267.4
G3V2F7	121338	104535	154408
G3V2T7;H0YFJ8;Q8WXE9	79830.2	78895.7	63163.6
G3V2U7;P07311	Filtered	Filtered	Filtered
G3V2Y4	Filtered	Filtered	45720.6
G3V325	118181	113026	115515
G3V3F1;Q8NHV4	492481	477489	475064
G3V436	112524	129999	132930
G3V4K3;Q9H9C1	43140.8	44468.4	38704.6
G3V4L5;Q9BQT8	79517	57363.7	55900.2
G3V529;Q9GZR7	31188.9	28193.7	31278.8
G3V533;Q6ZMZ3;Q6ZMZ3-2	Filtered	5167.6	810050
G3V583;Q8N128;Q8N128-2	56174	55581.5	64979.2
G3V599;G3XAC5;O15320;O15320-3;O15320-4	70029.9	71387.1	88069.9
G3V5J8;Q9NUM3;Q9NUM3-2	Filtered	Filtered	Filtered
G3V5L1;P61244;P61244-2	22284.5	22655.2	20087.3
G3V5P4;Q9Y281	458618	78691.4	84867
G3V5Q5;Q9BU02	Filtered	Filtered	Filtered
G3V5T0	34264.2	32026.4	33339.2
G3V5T9;P24941	169785	146743	185266
G3XA81;Q9BTX1;Q9BTX1-2	232625	221746	231158
G3XA93	25281.4	15188.4	21700.1
G3XAA0;Q8NFD5;Q8NFD5-2;Q8NFD5-3	Filtered	Filtered	Filtered
G3XAB3;Q96AE7	60574.8	64951.2	74897.2
G3XAB8;Q9HCJ0;Q9HCJ0-2	Filtered	Filtered	Filtered
G3XAE6;Q8IWU5;Q8IWU5-2	39360.8	24041.3	40991.2
G3XAG2;H0YNH8;Q9BZF9	10509786	20625718	9361906
G3XAI2;P07942	409920	412659	408748
G3XAI9;Q5BKY9	212611	200177	223345
G3XAJ0;Q6JQN1	28194	28908.2	30435
G3XAN8;Q9Y5J9	1.20479e+06	1.21665e+06	1.17286e+06
G3XAP3;H7BY43;Q9NUT2;Q9NUT2-2	86484.4	83459.2	87976.8
G3XCN9;Q86TS9	258645	257841	256225
G5E927	91094.8	88576.1	78997.7
G5E933;O95248;O95248-4	113622	106107	109823
G5E934	91702.6	53210.6	70569.9
G5E943;Q14542;Q14542-3	12716.8	13473.9	14311.5
G5E947	99467.8	103572	98564.4
G5E948;O95819;O95819-3	312512	316095	316847
G5E949;P51649	256825	255368	261032
G5E994	38944.9	28514.3	24935.6
G5E9A6;P51784	35956.7	Filtered	19640.8
G5E9B3;Q9BXB1	Filtered	Filtered	Filtered
G5E9D6;H0YJ86;Q9NS73;Q9NS73-2;Q9NS73-5	Filtered	Filtered	Filtered
G5E9E2;P29372;P29372-2;Q5J9I4	42752.8	26520.8	29469.6
G5E9E7;Q07157-2	322749	301959	304606
G5E9F3;Q9Y6J0	Filtered	Filtered	Filtered
G5E9F4;G5E9M7;G5E9M9;Q14135;Q14135-2;Q14135-4;Q14135-5;Q14135-6	Filtered	Filtered	Filtered
G5E9K7;O95251	Filtered	Filtered	11885.6
G5E9M5	160863	178366	203831
G5E9M6;Q9NX61	57653.8	51740.1	49151.9
G5E9M8;P08047	Filtered	Filtered	Filtered
G5E9N1;Q86VX9;Q86VX9-2;Q86VX9-3	66356.5	69562.2	76198.8
G5E9U1;Q15642;Q15642-2;Q15642-3;Q15642-4	10940.1	10882.1	Filtered
G5E9V1;Q92734	58924.1	52981	82772.4
G5E9V5;G5E9W7;P82650	683477	707891	661519
G5E9W2;Q9P2E5	57913.1	68390.2	60527.1
G5E9Y2	156476	153123	164927
G5EA00;Q8WUR7	20356.4	234257	Filtered
G5EA09;O00560-2	2397680	2.30005e+06	2.34944e+06
G5EA30;Q92879-4	115096	115648	112781
G5EA42;Q9NZR1	63492.9	63427.3	63873.8
G8JL95;Q9Y6X3;Q9Y6X3-2;Q9Y6X3-3	Filtered	Filtered	Filtered
G8JLB6;P31943	741138	734239	736132
G8JLC9;Q63HQ2-2;Q63HQ2-4	61080.2	65855.1	67725.3
G8JLD3;G8JLM9;Q8IUD2;Q8IUD2-2;Q8IUD2-3	71651.5	70581.9	68490.2
G8JLD5;O00429-2;O00429-4	40061.4	40396.4	39801.6
G8JLE5;Q9BVW5	Filtered	Filtered	Filtered
G8JLG2;Q15517;Q2L6G8	79559.6	79430.3	90575.8
G8JLI1;Q4LE39;Q4LE39-2;Q4LE39-3	47767	55501.7	49631.2
G8JLI4;P02458;P02458-1	32569.6	27848.1	29897.2
G8JLI6;Q8IVL6	220206	220946	227268
G8JLJ6;H3BLT4;O15392;O15392-2;O15392-4;O15392-5	Filtered	Filtered	Filtered
G8JLK4;O75410;O75410-2	70354	156094	110841
G8JLL7;Q9H7P6	89744.5	88520.2	88344.9
H0Y2M7;H0Y599;Q8N1I0;Q8N1I0-3	88547.8	42865.1	42705.8
H0Y2P2;Q96IV0;Q96IV0-2;Q96IV0-3	Filtered	Filtered	Filtered
H0Y2P9;H7C0F2;Q8TBF5;Q8TBF5-2	21353.6	20094.8	4751.23
H0Y2T3;Q6IAN0	171358	174389	175379
H0Y2T7;Q9P2C4	237703	233615	249021
H0Y2Y8;Q15942	35329.8	33656.1	49837.8
H0Y2Z4	Filtered	Filtered	Filtered
H0Y327	68932.1	68473.9	67375
H0Y360;Q01433;Q01433-2	66411.5	88052.3	97698.3
H0Y3H2;Q99758	102474	105759	106164
H0Y3J5;Q9Y233;Q9Y233-2	Filtered	Filtered	Filtered
H0Y3R8	Filtered	Filtered	Filtered
H0Y3Y8;Q6NUK4	84331.1	85222.6	79630.6
H0Y449	44652	29525.4	31810.4
H0Y465;P21359;P21359-2	29513.8	11895.7	15603
H0Y477	Filtered	Filtered	Filtered
H0Y501;H7C1M5;Q9H147	Filtered	Filtered	Filtered
H0Y5H2;H7BY75;Q9BTV7	51366.3	60218.3	Filtered
H0Y5J5;Q7RTV5	Filtered	Filtered	Filtered
H0Y612;Q9UPN9;Q9UPN9-2	22098.4	16449.8	22004.8
H0Y645	Filtered	Filtered	Filtered
H0Y6C3;Q53H96	23254	Filtered	Filtered
H0Y6E6;Q92622;Q92622-3	71679.8	80140.3	71477.1
H0Y6K5;H0Y7L6;Q02447;Q02447-2;Q02447-3;Q02447-4;Q02447-5;Q02447-6	Filtered	7306.58	5786.17
H0Y7A5;Q9BX10;Q9BX10-2;Q9BX10-4	Filtered	Filtered	81654.7
H0Y886;O43674	404965	421405	415608
H0Y8A7;Q9NV92	115616	117813	141024
H0Y9R1;Q8IYR6;Q8IYR6-2	71181.7	79694.1	98653.3
H0Y9X1;Q96EY4	65374.7	63912.3	62890.9
H0YA52;Q9H0N5	50332.1	54672.6	67379.9
H0YAR1;Q9Y4K0	65872.6	75624.4	79563.7
H0YAV1;Q7LG56	Filtered	Filtered	Filtered
H0YAZ3;O60504;O60504-2	97305	Filtered	Filtered
H0YB13;O76061	18172	Filtered	19580.3
H0YCK3;P55265-2	Filtered	Filtered	Filtered
H0YD93;Q8WXA3;Q8WXA3-2;Q8WXA3-3	70376.6	72724	78685.9
H0YDM2;I3L0I1;O94964;O94964-2	56470.7	46900.4	60717.3
H0YDQ8;Q53ET0;Q5T4K5	Filtered	Filtered	Filtered
H0YDU8;P53041	60323.5	60478.1	61362.4
H0YE28;Q8IZQ5	Filtered	Filtered	Filtered
H0YE66	Filtered	Filtered	Filtered
H0YE88;P28347	Filtered	34186.6	Filtered
H0YEB6;O60232	63879.7	60293.1	61146.8
H0YEF7	105770	109411	113231
H0YEL0;O14893;O14893-2;O14893-3	285913	238050	185362
H0YG33;P08107	7068580	6.9793e+06	7191337
H0YG49;Q01130	547860	579964	591410
H0YGC0;P52756	Filtered	Filtered	Filtered
H0YGH4;P01023	261185	248696	259470
H0YGP4;P31327	186434	190419	187933
H0YGR4;Q9Y3B8	124344	101246	92423.8
H0YH46;Q9NVR0	Filtered	Filtered	Filtered
H0YH67;Q8N8S7-2	192913	177260	176463
H0YH94;Q9NPR9	35850.9	44049.8	50776.1
H0YHD9	816504	729573	764615
H0YHF1;Q96MF6;Q96MF6-2	Filtered	Filtered	Filtered
H0YI09;Q9H8H3	525427	542670	551011
H0YI46;Q14D22;Q9BY43	Filtered	Filtered	Filtered
H0YIE9;O94952;O94952-1;Q4G104;Q8IUQ5	Filtered	Filtered	Filtered
H0YIV9	264776	261567	266000
H0YK61;H0YNK0;H0YNK8;Q5J8M3;Q5J8M3-2;Q5J8M3-3	177088	186819	133027
H0YK72;H0YK83;H0YNG3;P67812	110100	105268	265683
H0YKN5;Q9GZN2	Filtered	Filtered	Filtered
H0YLB5;P14859;P14859-2;P14859-3;P14859-4;P14859-5	Filtered	Filtered	187182
H0YLH3;Q92696	Filtered	Filtered	Filtered
H0YLN8;Q96QT4	Filtered	Filtered	Filtered
H0YLU8;H0YMD1;P01130;P01130-3;P01130-4	98856	102175	106513
H0YLV5;H0YMB3;H0YNJ6;Q6PKC0;Q86T14;Q9P2T1;Q9P2T1-2	18345.7	24610.5	29728.6
H0YLW2	Filtered	Filtered	Filtered
H0YLY9;Q14442	34415.7	20318.9	10356.6
H0YMV8;Q71UM5	1032041	970872	1.0224e+06
H0YN65;Q8NCH0	47771	44347.9	59850.1
H0YNH6;Q9Y3B6	134727	133208	132990
H0YNP1;O94923	55875	106371	91741.1
H3BLU6;Q63HN8;Q63HN8-4	Filtered	Filtered	Filtered
H3BLV9;Q96SB4;Q96SB4-3	74861.5	80439	79811.2
H3BLW6;Q5T3F8	38157.1	41863.1	45043.7
H3BLZ8;Q92841	1.01385e+06	991628	999296
H3BM14;H3BM74;Q9Y5A7;Q9Y5A7-2	Filtered	55811	Filtered
H3BM82;Q6FIF0;Q6FIF0-2	Filtered	Filtered	Filtered
H3BMF4	3.3868e+06	3.46572e+06	3392785
H3BMJ2;Q6ZRI6;Q6ZRI6-2	37082.9	26693.7	Filtered
H3BMM9;H3BTC0;H3BV80;Q15287	606174	563616	582678
H3BMQ0;P49815;P49815-2;P49815-3;P49815-4;P49815-5;P49815-6	69838.3	111810	75645.6
H3BMQ5	Filtered	Filtered	Filtered
H3BMU1;H3BUI0;P53990;P53990-2;P53990-3;P53990-4	259713	262787	260706
H3BMX2;H3BQY8;H3BUT6;Q9NTJ4	88826.9	96681.5	80920.5
H3BN51;H3BQA4;H3BR94;H3BS05;H3BUD2;Q9BTE1	35116.2	37280.9	33583.5
H3BN55;H3BS49;H3BU81;H3BUD9;H3BVH7;P51159;P51159-2	94167.4	104210	96795.2
H3BNP9;Q9Y6N5	Filtered	Filtered	Filtered
H3BNQ7;H3BRN4;P80404	Filtered	Filtered	Filtered
H3BNR7;H3BS25;Q9BY12	818.192	Filtered	Filtered
H3BNT4;H3BSB3;Q99547	63795.6	58085.8	74805.5
H3BNU3	30066.6	34621.8	32144.7
H3BNY3	842914	695612	738126
H3BP13;H3BUK6;Q9UL33;Q9UL33-2	54906.6	68109.3	90144.1
H3BP28;Q99807	85027.1	87231.4	88052.4
H3BP91;P42126	800227	727424	604526
H3BPE1;H3BQK9	119950	129664	124536
H3BPG9;Q58EX7;Q58EX7-2	Filtered	93280.7	Filtered
H3BPX2;Q5VST9;Q5VST9-2;Q5VST9-3;Q5VST9-5;Q5VST9-6	114470	113604	128702
H3BQB8;H3BUX2;O43169	217099	232302	242205
H3BQH3;Q8TBB5;Q8TBB5-2;Q8TBB5-3	13822.3	22389	17159.9
H3BR50;P27449	186713	Filtered	Filtered
H3BRB6;Q8ND25;Q8ND25-2	Filtered	Filtered	Filtered
H3BRL3;O14562	Filtered	Filtered	37616.6
H3BRQ0;Q96CD2;Q96CD2-2	7944.17	Filtered	6179.58
H3BRY3;P31146	38985.1	39149.6	39628.8
H3BS42;Q9H5H4	Filtered	Filtered	Filtered
H3BS47;H3BV03;Q68CZ1;Q68CZ1-2	Filtered	Filtered	Filtered
H3BSH7;Q969X6	50342.7	51020.6	54180.6
H3BSM5;P60520	74070.3	76338.8	78887.4
H3BST1;Q9UL45	Filtered	Filtered	Filtered
H3BT11;Q9NVU0;Q9NVU0-2;Q9NVU0-3	18443.7	20899.5	53865.7
H3BTN6;Q9H6L2;Q9H6L2-2;Q9H6L2-3	8055.34	3472.09	5692.81
H3BUA6;Q8N543	Filtered	Filtered	Filtered
H3BUV4;Q9NWW5	160539	177745	175720
H3BUV9;Q96S82	Filtered	Filtered	Filtered
H3BV00;Q6EEV4;Q6EEV4-2	Filtered	Filtered	Filtered
H6UMI1;O95166	42774.2	38905.1	Filtered
H7BXC6;Q96RQ1	82142.4	80608.4	72163
H7BXD5;H7C2Z6;P28676	57180.8	58480.1	60864.6
H7BXF4;Q9NXE4-2	75841.8	77620.1	79254
H7BXF5;Q9H0E3;Q9H0E3-3	29689.5	Filtered	Filtered
H7BXW3;Q9UNF1;Q9UNF1-2	41015.7	39093.4	44527.4
H7BXY8;O75882;O75882-2;O75882-3	50085.9	53267.9	50373
H7BXZ6;Q8IXI2-5	192068	190296	201700
H7BY36	Filtered	Filtered	Filtered
H7BY58;P22061-2	892216	923641	906082
H7BY99;Q8IZ21;Q8IZ21-2;Q8IZ21-3	28662.9	Filtered	24168.2
H7BYB2;Q5T8D3	116700	113788	115286
H7BYG3	536060	518066	516084
H7BYJ1;Q969K3;Q969K3-2	Filtered	Filtered	Filtered
H7BYJ8;P48960;P48960-2;P48960-3	125303	124117	137477
H7BYM7;Q86XZ4	10771	10116	7838.57
H7BYP5;Q5VUB5	50339.6	61360.1	63397.5
H7BYW0	39632.4	37976.3	42183.9
H7BYY1	49174.2	51087.1	51044.1
H7BZ14;Q9H2H8	16889.8	19443.7	21987.3
H7BZ59;Q969E2;Q969E2-2	311303	301858	340097
H7BZJ3	6.81293e+06	6.39827e+06	6451538
H7BZK6;P62068;P62068-2;P62068-3;P62068-4	13823.1	9798.25	Filtered
H7BZR0;P18887	349333	348841	345043
H7BZT4;P61956;P61956-2	12279.2	11739.9	13376.4
H7BZY3;H7C4B9;Q9P1T7;Q9P1T7-1	13056.2	13002.4	12211.7
H7BZY9;Q8WTS1	Filtered	Filtered	Filtered
H7C0B3;H7C1G1;Q96K49;Q96K49-2	36041.5	166668	5274.8
H7C0S8;O75575	Filtered	Filtered	Filtered
H7C1J4;Q6BDS2	114097	107456	102254
H7C1N3;O15155	94003	93986.1	96947.7
H7C1U3;Q5T0F9-2	147942	186662	170191
H7C1U8;Q9BUR5	190664	183173	194620
H7C285;O95858	25250.7	Filtered	27785.4
H7C2Q8;Q99848	55476.3	55566.4	57949.7
H7C2V5	70694.5	71074.1	73405.3
H7C3B3;H7C4C1;Q9NVV0	28376	28446.8	29121.3
H7C3D8;Q7Z7K0	100848	89516.1	91145.5
H7C3K3;Q15057	Filtered	Filtered	Filtered
H7C3R6;Q8IWT0;Q8IWT0-2	Filtered	Filtered	Filtered
H7C4C9;Q3B820;Q3B820-2;Q3B820-3	Filtered	Filtered	48134.6
H7C4P8;Q6ZU65;Q6ZU65-2	Filtered	Filtered	Filtered
H7C4T5;Q9NR56-2;Q9NR56-3;Q9NR56-4;Q9NR56-5;Q9NR56-6	Filtered	7679.24	30738.9
H7C4Z8;Q6P1Q9;Q6P1Q9-2	30802.2	29108.9	35266
H7C561	Filtered	Filtered	Filtered
H7C5B8;O95178	113314	122532	146570
H7C5E8;P02787	Filtered	Filtered	Filtered
H7C5I4	Filtered	Filtered	Filtered
H9KV30;Q8N9B5;Q8N9B5-2	34866	Filtered	22382.7
H9KV44;Q14156;Q14156-2	78226.7	77250.5	79202.3
H9KV46;Q86Y91;Q86Y91-2;Q86Y91-3;Q86Y91-4	Filtered	Filtered	16552.9
H9KV86;Q96JP5;Q96JP5-2	Filtered	Filtered	Filtered
H9KVA9;P46736;P46736-2;P46736-3	46610.8	38880.1	43197.1
I3L072;Q9BSJ5-2	39284.5	53158.3	51114.3
I3L085;Q8TCC3;Q8TCC3-2	123794	120482	118760
I3L097;Q6ZSR9	70487.6	63920.8	62706.8
I3L0A4;Q9NQA3	72682.6	71525.7	74098.3
I3L0C1;Q96Q15;Q96Q15-2;Q96Q15-3	163124	163430	213342
I3L0D3;P00738;Q0VAC5	Filtered	Filtered	Filtered
I3L0E3	500406	489872	496606
I3L0K7	101367	99340.3	92949.3
I3L0L6;Q9H6Y7	603248	589762	623019
I3L0N3;P46459	633879	625189	641392
I3L0U5;Q6PK04	26896.3	23182.9	Filtered
I3L0X5;O75391	Filtered	Filtered	301929
I3L100;I3L2W2;Q96JN8;Q96JN8-2	71124.5	69366.4	54709.4
I3L112;P52429	93314.6	95147.6	97733.5
I3L124;I3L1H1;I3L266;I3L3K8;Q86WA9	69716	61762.4	70744.8
I3L1Q2;Q8WUZ0;Q8WUZ0-2	Filtered	Filtered	Filtered
I3L1Y9;Q96CP2	Filtered	Filtered	Filtered
I3L291;Q16625;Q16625-3;Q16625-4	96786.5	94233.4	94987.7
I3L2B0	Filtered	Filtered	Filtered
I3L2C7;P57678	33852.8	31273.1	29068.3
I3L2H2;Q15697;Q15697-2	Filtered	Filtered	Filtered
I3L2J8;Q9UPN4;Q9UPN4-2;Q9UPN4-3	32456.3	36772.7	43352.3
I3L2N2;O14641	236876	241882	245521
I3L2Q6;I3L3Q1;Q6ZSZ5;Q6ZSZ5-2;Q6ZSZ5-3	Filtered	Filtered	Filtered
I3L2R9;Q9NXR1;Q9NXR1-2	64845.8	75120.5	73536
I3L383;I3L3R1;P17481;P31273	Filtered	Filtered	Filtered
I3L397;I3L504;P63241;P63241-2	449981	453300	485097
I3L3A8;Q8IZL8	25808.1	21229.3	23590.2
I3L416	160362	151517	164381
I3L448;Q5TC12	131463	127011	124108
I3L4C2;Q9UQB8;Q9UQB8-2;Q9UQB8-3;Q9UQB8-4;Q9UQB8-5;Q9UQB8-6	65100.9	80018.7	69099.2
I3L4I4;O75674;Q8N749	83086	76756	82451.4
I3NI00;P35613;P35613-2	5337601	4.88984e+06	3.96047e+06
O00116	616340	600006	613453
O00124;O00124-3	48618.4	32908.5	51398.1
O00139-2	412027	413752	419828
O00148	44853.2	50487	28671.7
O00151	35163.4	34857.6	39118.9
O00154;O00154-4;O00154-6	50648.5	51145.3	53070.6
O00159-2	98906.4	96076.5	104339
O00161	442904	450014	443026
O00165	270427	274058	280324
O00170	54553.8	54291.5	56604.8
O00178	100004	97303.1	100476
O00186	568405	566746	591050
O00217	1.31747e+06	1.26447e+06	1.26374e+06
O00231	62505	62319.7	62067.6
O00232	73372.8	70504.8	72813.9
O00233	19707.8	22848.9	22421.4
O00257	17712.5	18823.6	34351.7
O00264	3.42869e+06	3.31572e+06	3.48942e+06
O00267;O00267-2	25722.7	25797.9	25259
O00268;Q5TBP5	5389.43	6681.85	7255.6
O00273	Filtered	8510.65	9166.25
O00287	55689.5	Filtered	48234.8
O00291	113940	104321	111590
O00299	176850	161609	151562
O00311	18167.4	16990.7	20056.1
O00330	428648	417688	443404
O00399	38872.7	35093.8	31474.5
O00400	73396.8	64147.5	57743.1
O00401	71397.1	47711	48135.9
O00410;O00410-3	409817	407808	387585
O00411	152266	146144	133796
O00418	225925	Filtered	Filtered
O00422	53913	51500.4	48310.1
O00425	346548	330999	372509
O00442	39388.8	37425.5	33350.8
O00443	88891.3	84925.7	88265.7
O00461	82455.9	75205.9	82255
O00462	379540	375028	381280
O00468	536280	490368	478742
O00469-2	521554	515800	507553
O00471	55407	53402.1	55882.2
O00479	6379.84	5668.07	4494.29
O00483	1.45606e+06	1.43833e+06	1.54832e+06
O00487	146588	155527	162779
O00488	Filtered	Filtered	Filtered
O00505	85355.4	87672.5	90758.3
O00512	47003.1	43168.2	47143.7
O00548	Filtered	Filtered	Filtered
O00560	482793	489982	512752
O00566	34029.1	35808.7	41085.5
O00567	47202.4	39843.1	36525.3
O00571	675510	674458	693713
O00623	39801	53836.5	38653.4
O00625	Filtered	Filtered	Filtered
O00629	50298.3	50490	54136.6
O00743;O00743-2;O00743-3	45366.2	44267.2	43974.2
O00762	Filtered	Filtered	991506
O00764	10492.7	13641.8	37362.8
O00767	211177	198305	247853
O14494	31111.6	22926.9	19823.3
O14495	150.047	164.008	186.548
[truncated: 4,968 more rows]

## Sheet: TMEM-IP
Abundances - TMEM-IP (TMEM192-3xHA immunoprecipitation)
PG.ProteinAccessions	Replicate 1	Replicate 2	Replicate 3
A0AVT1	195846	97329.4	202800
A0FGR8-2;H7BXI1	671827	601273	542826
A0JLT2;A0JLT2-2	87433.8	78551.4	91645.3
A0JNW5	52654.8	41430.1	39227.3
A0MZ66;A0MZ66-2;A0MZ66-3;A0MZ66-4;A0MZ66-5;A0MZ66-6;B7Z7Z9	27800.3	15880.9	Filtered
A0PJW6	74338	59637.8	44799.9
A0PJZ3	70170.7	57305.2	51456.6
A0T4C8;E7ETB1;E9PCV4;Q9NRA0;Q9NRA0-2	49785.3	51700.2	57272.6
A1KXE4;A1KXE4-2;E7EVB9	148642	193485	196331
A1L020	Filtered	42671.6	31807.5
A1L0T0	248001	266476	228037
A1L170;A1L170-2;F8W6W0	Filtered	Filtered	Filtered
A1L188	Filtered	10449.8	9158.88
A1L443;D3YTH6;E2QRH1;F2Z373;Q5VZR2	257660	251285	257791
A1XBS5;A1XBS5-2;A1XBS5-3;A1XBS5-4;E5RGD0;F5H8I5;F8W7P5;G8JLC7;G8JLK8;H0YC32	Filtered	Filtered	38523.6
A2A2E9;Q86X10;Q86X10-3	85605	90079	100981
A2A2G4;Q9Y672	80760.8	92517.3	83753
A2A2L5;A8MSH5;Q9BY42	10246.1	12937.6	10533.9
A2A2Q9;Q9Y312	10272.6	29748.1	52786.2
A2A3N8;E7ENY0;E7EV99;P35611;P35611-2;P35611-3	112844	110197	94396.3
A2AAT3;B0S7V1;E9PD01;F6QTR8;F6REG0;F6RG32;F6SGB5;F6U8F7;F6UB75;F6UBK4;F6UKM5;F8VZ50;P28068	9537.93	9690.23	5348.53
A2AB90;A2ABB9;A8MUD0;D3YTI9;G5E9H8;O15533;O15533-2;O15533-3	18390.3	46145.6	34742.4
A2ABE9;A3KGM4;A3KGM5;A3KGM6;A3KGM7;B0UXD5;B0UXD6;B0UXD7;E7ENS8;H7C2J4;H7C5D6;O43196;O43196-2;O43196-3;O43196-4;Q5SSQ8;Q5SSR2	55279.2	55181	39757.6
A2ABF8;A2ABF9;B0UZY0;B0UZY1;B0UZY3;H0YHA9;H0YIM0;Q96KQ7;Q96KQ7-2	Filtered	Filtered	Filtered
A2AEA2;A2AEA4;F5GXA6;P10321	242190	223304	219826
A2BEU2;F5H135;P04440	162424	163968	163507
A2RRP1	156329	211182	265887
A2RTX5;A2RTX5-2	39575	302092	Filtered
A2RU67	208693	205119	201304
A2VCQ3;Q01973	49167.1	55680	52386.2
A3KFJ0;O14965	24178.3	Filtered	Filtered
A3KFL4	70466.5	91297.5	68659.7
A3KMH1;A3KMH1-3	30989.1	30107.4	532208
A3KMH1-2	Filtered	Filtered	Filtered
A3KN83;A3KN83-2;A3KN83-3	96133.1	85104.7	88390.3
A4D104	Filtered	Filtered	Filtered
A4D1D5;P21439;P21439-2	85280	184786	244902
A4D1E9	75157.3	81003	39742.7
A4D1P6	91205.5	109601	110577
A4D1S0;A4D1S0-2	28080.4	23095.5	23889
A4D1U4	179629	207013	230229
A4D1W8;Q9UM22	1210081	986663	1.07924e+06
A4D212;Q8N201	Filtered	Filtered	Filtered
A4D2Q0;E9PHI4	12161.6	13899.4	10141.9
A4D7V1;B8ZZU6;E9PBF9;E9PEK8;F5H629;G8JLM5;H7C2N6;P15336;Q8TAR1	Filtered	Filtered	Filtered
A4PB68;B0QZ55;H7BY62;Q3T8J9;Q3T8J9-2;Q3T8J9-3;Q9H869-2;Q9H869-3;Q9H869-5	Filtered	Filtered	Filtered
A5D8V6;F5H3K0;F5H4Q5	16032.5	51772.3	48001.4
A5PLL7;Q5TGE1;Q5TGE2	95153.5	225947	210018
A5PLN9;A5PLN9-2;A5PLN9-4;A5PLN9-5;A5PLN9-7;F5GXC3	Filtered	94482.2	Filtered
A5YKK6	159589	132728	175271
A6H8M8;B0UZ83;B0V2C8;F8VSI2;F8VW91;F8VZD8;P0C0L4;P0C0L5;Q5JNX2	102148	81926.7	107299
A6H8Z7;Q6UWP7	391867	365005	286774
A6NCB2;A6NMG4;Q9BX74	Filtered	37952.5	32369.2
A6NCD9;A6NKJ2;F8W8M4;F8WAB0;F8WAB1;H0Y3K7;O14639;O14639-2;O14639-3;O14639-4;O14639-5;Q5JVV3;Q5T6N2;Q5T6N4	58439.9	45230.7	24952.3
A6NCE7;H3BTL1;Q9GZQ8	475523	477054	599715
A6NCI0;Q9Y6G3	106320	110277	78976.3
A6NCN2	44860.7	3.94188e+06	8360477
A6NCZ0;C9JFX6;Q9BUJ0	55559.2	43028.8	45384
A6NCZ6;Q9BWM7	144648	32484.8	Filtered
A6NDG6	51175.3	54152.3	46677.1
A6NDJ8;Q86YS6	96556.1	79642	90538.8
A6NDN0;O43617	276762	303058	320173
A6NDS2;Q86WR7;Q86WR7-2	91861.2	85584.9	118602
A6NDU8	35903.4	38586.6	31945.4
A6NDW3;B4DKL4;E9PHD4;Q86X29	70191.7	71619.5	63828
A6NDW6;H0YDD3;H0YDQ1;Q9BVK2	267186	302239	230640
A6NDY9	147524	90160.1	86103.8
A6NE20;E7EQL6;F8WB49;O43272;O43272-1;O43272-2	Filtered	Filtered	Filtered
A6NED2;G3V2I3	18865.8	16817	Filtered
A6NEM2	173115	234168	202940
A6NEP9;H7BXY6;Q8NG11;Q8NG11-2;Q8NG11-3	32341.6	34262.6	31678.4
A6NES3;E9PL33;E9PM05;E9PS58;O14681	170070	251782	422304
A6NF48;Q9Y2X9	54621.3	59105	57051.2
A6NFN2;F5H1G9;F8WA55;F8WA56;Q8IZP0;Q8IZP0-10;Q8IZP0-2;Q8IZP0-3;Q8IZP0-4;Q8IZP0-5;Q8IZP0-6;Q8IZP0-7;Q8IZP0-8;Q8IZP0-9	119958	183228	163334
A6NFN6;Q9ULL5;Q9ULL5-2;Q9ULL5-3	Filtered	35391	Filtered
A6NFQ9;A6NMH6;F6W7K9;F8W8I8;Q92599;Q92599-2	118877	118627	124703
A6NFV8;Q96EV8	112524	127728	129323
A6NFX8;Q9UKK9	215822	266945	319342
A6NFY7	Filtered	Filtered	Filtered
A6NG10;B4DFG2;E7EX86;Q969T9	29752.9	25083.6	34134.7
A6NG79;Q92733	327031	301372	365886
A6NGJ4;Q7Z7H8	120213	124666	129126
A6NGW1;O95070	365879	297760	337106
A6NHB5;A6NHN7;Q14202;Q14202-2	Filtered	Filtered	Filtered
A6NHF2;B4DLJ9;F8W1Q3;P43251	15359.7	14433.6	15061.1
A6NHR9	28200.5	34528.6	22862.4
A6NHS7	143908	100553	163502
A6NI00;P63092;P63092-2;P63092-3	654033	710125	726791
A6NI04;B4E3U2;E9PJM3;E9PL46;Q9UK99;Q9UK99-2;Q9UK99-3	Filtered	Filtered	Filtered
A6NI12;C9JDH3;H7BXQ4;H7BYF2;Q5JRG1;Q9BVL2;Q9BVL2-2	129729	352038	297338
A6NIG5;Q969Y2;Q969Y2-2;Q969Y2-3	111158	87807.5	71272.8
A6NIH7	115976	78581.9	78773.8
A6NIR2;Q9Y547	65779.6	86491.8	98745.4
A6NIW1;P14209	47543.6	76723.6	73821.7
A6NIW2;Q5JSL3	8633.32	6688.26	9550.54
A6NJ78	15160.3	161243	1.16532e+06
A6NJD7;Q8IWP9	70104.9	70251.6	153612
A6NJF5;Q9UI36;Q9UI36-2	39217.6	5154.04	22241.2
A6NJK7;Q76FK4;Q76FK4-2;Q76FK4-3;Q76FK4-4	Filtered	Filtered	Filtered
A6NJM0;B1AKC9;P29323;P29323-2;P29323-3	Filtered	Filtered	Filtered
A6NJP5;P32189;P32189-1;P32189-2	13137.9	40757.3	32443.2
A6NJX0;A8K7N4;Q9H4F1	136396	127555	136206
A6NJZ6;O75054-2	118261	110544	97899.8
A6NJZ9;Q8WTT2	Filtered	Filtered	Filtered
A6NK58	Filtered	Filtered	Filtered
A6NKD9	35978	40471.7	29542.8
A6NKF1;F8WC89	Filtered	Filtered	Filtered
A6NKF9;B7ZAQ6;B7ZAQ6-2;B7ZAQ6-3;P0CG08	645026	592125	323984
A6NLH6;Q9P003	1099472	1.15536e+06	1.07179e+06
A6NMI8;Q9BX70;Q9BX70-2;Q9H0C5	Filtered	Filtered	Filtered
A6NML8;C9J6U3;F5H7I1;O60879;O60879-2;O60879-3	2183.55	4509.42	4004.62
A6NMN0;P46020;P46020-2	39713.8	23289.3	30271.4
A6NMQ1;P09884	116506	118053	125292
A6NN50;O75147	28972.3	Filtered	11054.6
A6NNI4;B4DPP0;G8JLH6;P21926	51086.8	35518.8	53420.8
A6NNL5	Filtered	Filtered	123847
A6NNV6;O95229	52271.7	63166.4	63719.4
A6PVM9;F5GYC9;Q9BQI0;Q9BQI0-2;Q9BQI0-3	37114.5	46292.3	36548.6
A6PVN5;Q15257;Q15257-2;Q15257-3	36031.1	38068.2	44183.7
A6PVT6;A8MSQ5;F5GZV0;F5H083;F8WEA4;Q9NR82;Q9NR82-2;Q9NR82-3;Q9NR82-4	Filtered	Filtered	Filtered
A6PW55;Q15906	Filtered	66866.1	60003.4
A6PW57;Q99755-2;Q99755-3	102654	107124	92448.5
A6PWM2;Q6UXH1;Q6UXH1-2;Q6UXH1-3;Q6UXH1-4;Q6UXH1-5;Q6UXH1-6	Filtered	Filtered	Filtered
A6QRH6;P98173;Q5HY75	514709	449593	454015
A7E2V4;A7E2V4-3;A7E2V4-4;A7E2V4-5	Filtered	23182.8	Filtered
A7MAP0;Q9ULV4	307771	243225	211902
A8CG34	38106.4	46920.9	76136.1
A8CTX8;A8CTY3;B4DTM2;E7ERJ0	129169	117556	119685
A8K040	83941.2	95830.8	92252.3
A8K092	5.38752e+06	4.27051e+06	3.61939e+06
A8K1B6	814043	762744	791678
A8K1C9;Q96LT9	Filtered	Filtered	Filtered
A8K2U0;F5H2W3	65648.5	Filtered	Filtered
A8K2U1;F5H225;Q5NDL2;Q5NDL2-2;Q5NDL2-3	13874.9	16913.5	33746
A8K327;B4E0V4;Q9UQ49	11439.2	11862.5	13341.6
A8K3Z3;P62195	199370	234189	195865
A8K7Q2	46299.1	71207.2	78326.7
A8MPX7;F5GWL7;Q9H5V9	83341.6	73636.4	72087.2
A8MPX9;O75140;O75140-3;O75140-4;O75140-8	15594	26709.5	Filtered
A8MQB8;G3V0J0;Q06787-2	13117.5	61987.2	16812.5
A8MST6;E7ERV6;E9PHX5;Q5JTW2;Q5JTW2-2;Q5JTW2-3	Filtered	21000.3	Filtered
A8MT24;E5RGQ3;Q9H446	64875.2	90561.1	102158
A8MT69;A8MT69-2;A8MT69-3	Filtered	Filtered	Filtered
A8MT70;A8MT70-2;F2Z370	Filtered	Filtered	Filtered
A8MTC3;C9JWB0;Q7Z5J4;Q7Z5J4-2	Filtered	1991.93	Filtered
A8MTG3;E1P660;H0Y3M2;O43670;O43670-2	256404	245745	291770
A8MTG8;B7Z441;C9JAA7;C9JBY2;F5GWK4;G5E9V6;Q8IUR7;Q8IUR7-2;Q8IUR7-6	50013.2	29615.3	20904.7
A8MTH6;C9J0K6;P30626	670279	752188	775909
A8MTN3;F5H1T9;F5H6S0;P0C7H8;Q9BYR9;Q9BYU5	Filtered	561443	1.30458e+06
A8MTT3	53762.2	31280.9	60590.3
A8MTY9;O14972	69272.1	89000.8	131551
A8MU17;F5H2B2;F5H6B6;F5H8A0;Q86TN4;Q86TN4-2	Filtered	Filtered	Filtered
A8MU27;A8MUA9;B4DUW4;P55854	1074484	1.21249e+06	1.35331e+06
A8MU44;Q9UJC3	1539.26	2669.64	Filtered
A8MU99;Q9NRP7;Q9NRP7-2	46935.4	52336.4	49611.2
A8MUB1;P68366	Filtered	55113.5	139624
A8MUM1;Q53HC9	120389	61743.3	68421
A8MUS2	276447	429067	Filtered
A8MUW5	149238	146715	140992
A8MV58;Q16643;Q16643-2	100497	123825	102889
A8MV89;Q5M775;Q5M775-2;Q5M775-3;Q5M775-4;Q5M775-5	50792.2	37494.1	93091.2
A8MVZ6;F8W113;Q96G01;Q96G01-3	96367.2	88527.1	90896.9
A8MWB4;B7Z1T4;O43739;O43739-2;Q15438;Q15438-2;Q99418;Q99418-2	Filtered	Filtered	Filtered
A8MWD3;O15371	735672	786976	647488
A8MWD9;F5H013;P62308;Q49AN9	222287	379164	354954
A8MWK3;P19022	147293	142595	114307
A8MWX0;Q96HR9	131415	117210	113472
A8MWY0	91793.7	105858	95979.7
A8MWY4;Q13029;Q13029-2;Q13029-3;Q5THJ1	Filtered	Filtered	Filtered
A8MX09;O94967;O94967-2;O94967-3	7318.6	6462.64	7863.36
A8MXF4;C9JX84;E7ET33;Q06033;Q06033-2	170163	152966	225440
A8MXP7;E9PAJ8;Q6NUT3;Q6NUT3-2	Filtered	228689	289258
A8MXP9;P43243	105427	154529	98472.7
A8MXQ1;P53801	539340	624993	692448
A8MXR0;Q9Y608;Q9Y608-2;Q9Y608-4	31133	23567.8	Filtered
A8MXV4	209537	165028	141076
A8MYC7;B1AMF0;Q8N2K1;Q8N2K1-2	34643.2	38358.8	32069.6
A8MYH2;B7WPL9;D6RBU4;D6RFZ8;E9PGM8;F8W9A8;H7BXU5;O43314;O43314-2;Q6PFW1;Q6PFW1-2;Q6PFW1-3;Q6PFW1-4;Q6PFW1-5;Q6PFW1-6;Q6PFW1-7	Filtered	53119.4	48538.1
A8MYQ9;Q9BZG1	179686	85030.6	93078
A8MYY3;Q9UPQ9-1	30198.3	37159.1	40454.5
A8MZF9;P55039	59803	62650.7	37095.4
A9C4B9;B0V3J0;E7EQB3;Q9BSV6	26482.7	40646.4	Filtered
A9X3U0;Q96GF1	590242	208503	206642
A9Z1X7;E9PCT1;Q8IYB3;Q8IYB3-2	297764	423784	459876
B0AZR7;Q13303;Q13303-2	55882	35861.4	Filtered
B0AZS3;B7Z5Z0;B7Z8R1;B7Z9U0;Q9UFF9	32450.5	30205.6	28546.3
B0AZS9;H0YBC7;H7BXD2;O60238	28502.5	Filtered	26728.8
[truncated: 6,779 more rows]
